# Supplementary material for: Decoupling climate impact of wastewater infrastructure and water stress alleviation across 300 cities in China is challenging yet plausible by 2030
Source: Research Square preprint supplement (doi:10.21203/rs.3.rs-1937527/v1), 2022-08-24
Supplement: Supplementary file 1 [file d7975e8f85b658435543cab1.xlsx]

## Sheet: #Readme
Supplementary Data for "Decoupling climate impact of wastewater infrastructure and water stress alleviation across 300 cities in China is challenging yet plausible by 2030" by Chen et al.
List of data:
1.1 cities_WWTPs inventory (2006-2030)				1.2uncertainty analysis
	item	unit		uncertainties of W-MRIO
	population	ten thousand		uncertainties of scenario
WWTP dataset	number_wwtps
	wastewater	ten thousand m3
	sludge_disposal	tons
	effluent_river	ten thousand m3
	effluent_sea	ten thousand m3
	effluent_irrigation	ten thousand m3
	effluent_recharge	ten thousand m3
	effluent_others	ten thousand m3
	effluent_I_B	ten thousand m3
	relcaimed_water	ten thousand m3
Water stress alleviation	wsi
	wsi'
	deltawsi	%
Climate impacts of WWTPs	CI_construction	Kt CO2e
	CI_relcaimed_water	Kt CO2e
	CI_wastewater	Kt CO2e
	CI_sludge_disposal	Kt CO2e
	CI_total	Kt CO2e
Climate impacts index of water stress alleviation	CIWSA	Mt CO2e

## Sheet:  cities_WWTPs inventory (2006)
city	province	population	number_wwtps	wastewater	sludge_disposal	effluent_river	effluent_sea	effluent_irrigation	effluent_recharge	effluent_others	effluent_I_B	relcaimed_water	wsi	wsi'	deltawsi	CI_construction	CI_relcaimed_water	CI_wastewater	CI_sludge_disposal	CI_total	CIWSA
Bozhou City	Anhui		2	1168	1600							0	0.009736	0.00973564		1.80391	1.83851	14.4304	5.81575	23.8886
Liuan City	Anhui		1	1460	3500							0	0.008728	0.00872793		2.64112	2.69178	21.1277	8.5149	34.9755
Hefei City	Anhui		1	5	81636							1630	0.210265	0.202103	-3.88188	10.5225	10.7244	84.1751	33.9243	139.346	0.0358966
Anqing City	Anhui															4.06532	4.1433	32.5206	13.1065	53.8357
Xuancheng City	Anhui															2.53886	2.58756	20.3097	8.18521	33.6213
Suzhou City	Anhui		1	920	12500							0	0.0155	0.0154997		4.09529	4.17385	32.7604	13.2031	54.2327
Chaohu City	Anhui		1	1650	150							0	0.010159	0.0101586		2.57568	2.62509	20.6042	8.30391	34.1089
Chizhou City	Anhui															2.00805	2.04657	16.0634	6.47388	26.5919
Huaibei City	Anhui		1	2400	1900							0	0.121926	0.121926		2.13256	2.17347	17.0595	6.87531	28.2408
Huainan City	Anhui		1	3200	13025							0	0.095152	0.0951524		2.91212	2.96798	23.2956	9.3886	38.5643
Chuzhou City	Anhui															3.31151	3.37503	26.4905	10.6762	43.8533
Wuhu City	Anhui		1	660	300							0	0.145704	0.145704		4.90534	4.99944	39.2404	15.8147	64.9598
Bengbu City	Anhui		1	4554	0							0	0.03793	0.0379297		5.82669	5.93846	46.6107	18.7851	77.1609
Tongling City	Anhui		1	1531	24087							0	0.415498	0.415498		1.79475	1.82918	14.3571	5.78622	23.7673
Fuyang City	Anhui		3	2351	17139							0	0.013221	0.0132212		4.30948	4.39215	34.4738	13.8936	57.0691
Maanshan City	Anhui		3	3183	3393							1	0.655972	0.655958		3.78363	3.85621	30.2672	12.1983	50.1054	23.5004
Huangshan City	Anhui		1	876	1928							0	0.003017	0.0030168		2.01627	2.05494	16.1292	6.50039	26.7008
Beijing	Beijing	1350	20	27634	267144							13069	1.55401	1.49479	-3.81055	43.2026	78.0547	193.401	391.105	705.764	0.185213
Sanming City	Fujian	111.67	3	1484	2822							0	0.00296	0.00296031		2.73871	0.917207	55.9223	34.4394	94.0176
Nanping City	Fujian	132.48	2	881	2361							0	0.001517	0.00151682		1.94345	0.65087	39.6837	24.4389	66.717
Xiamen City	Fujian	188.73	8	15328	86349							27	0.127256	0.127122	-0.104724	1.20723	0.404309	24.6508	15.181	41.4434	0.395738
Ningde City	Fujian															2.07691	0.695568	42.409	26.1173	71.2987
Quanzhou City	Fujian	369.12	8	5242	26019							22	0.008689	0.00867315	-0.187986	8.12907	2.72247	165.989	102.224	279.065	1.4845
Zhangzhou City	Fujian	189.27	1	2400	18250							6	0.002465	0.00246218	-0.10735	3.35251	1.12277	68.4558	42.1581	115.089	1.07206
Fuzhou City	Fujian	372.41	7	10455	52225							57	0.019569	0.0195295	-0.203344	7.22023	2.41809	147.432	90.7949	247.865	1.21893
Putian City	Fujian	133.91	0	0	15398							0	0.01153	0.0115296		1.36664	0.457696	27.9058	17.1856	46.9158
Longyan City	Fujian	108.63	1	2278	7885							0	0.001814	0.00181372		0.60036	0.201063	12.2589	7.54956	20.6099
Linxia Hui A.P	Gansu															1.28177	0.0716536	2.42875	7.35988	11.142
Lanzhou City	Gansu		5	6539	48337							377	3.53787	3.5202	-0.499358	5.55363	0.310459	10.5232	31.8887	48.276	0.0966763
Jiayuguan City	Gansu		1	446	50							446	22.8127	22.2374	-2.52177	2.54809	0.142444	4.82822	14.631	22.1498	0.00878344
Tianshui City	Gansu		1	840	765							0	0.091973	0.0919731		1.3168	0.0736117	2.49512	7.56101	11.4465
Dingxi City	Gansu		2	346	806							182	0.014256	0.0120685	-15.3457	1.53183	0.0856324	2.90257	8.79571	13.3157	0.000867718
Pingliang City	Gansu		1	700	0							0	0.066965	0.0669652		1.7619	0.0984939	3.33852	10.1168	15.3157
Qingyang City	Gansu															0.677527	0.0378751	1.2838	3.89033	5.88954
Zhangye City	Gansu		0	0	0							164	0.023949	0.0234604	-2.03828	1.20239	0.0672159	2.27833	6.90406	10.452	0.00512785
Wuwei City	Gansu		2	2427	4552							0	0.08517	0.0851695		2.35128	0.131441	4.45529	13.501	20.439
Gannan Zang A.P	Gansu															0.239078	0.013365	0.453014	1.37278	2.07823
Baiyin City	Gansu		1	634	3744							31	0.458425	0.457016	-0.307357	0.815146	0.0455683	1.54457	4.68053	7.08581	0.023054
Jiuquan City	Gansu		1	558	0							0	0.049316	0.0493156		2.39357	0.133806	4.53543	13.7438	20.8066
Jinchang City	Gansu		1	93	0							118	1.16804	1.15543	-1.0792	1.66488	0.0930701	3.15467	9.55966	14.4723	0.0134102
Longnan City	Gansu															1.28635	0.0719093	2.43741	7.38614	11.1818
Dongguan City	Guangdong	583.428	8	14123	36673							68	0.516394	0.516181	-0.0411508	27.4556	12.8743	384.304	95.3719	520.006	12.6366
ZhongShan City	Guangdong	214.694	1	1071	18591							0	0.038045	0.038045		32.9943	15.4715	461.832	114.612	624.909
Yunfu City	Guangdong	116.846	2	1526	1479							0	0.003124	0.00312394		2.65944	1.24705	37.2251	9.23807	50.3697
Foshan City	Guangdong	549.33	15	16811	79553							65	0.168695	0.168524	-0.101398	39.1652	18.3652	548.209	136.048	741.787	7.31561
Guangzhou City	Guangdong	817.66	8	15045	240892							171	0.184039	0.183857	-0.0988457	19.0599	8.93748	266.788	66.2081	360.993	3.65209
Huizhou City	Guangdong	237.195	1	3650	5480							44	0.009633	0.0096087	-0.248251	20.2341	9.48809	283.224	70.287	383.233	1.54373
Jieyang City	Guangdong															8.5386	4.00388	119.518	29.6604	161.72
Meizhou City	Guangdong	192.193	1	595	103							0	0.017483	0.0174834		5.156	2.41772	72.1702	17.9103	97.6542
Shantou City	Guangdong	350.033	1	4951	17300							35	0.076241	0.0761312	-0.14346	8.48528	3.97887	118.771	29.4752	160.711	1.12024
Shanwei City	Guangdong															3.47125	1.62772	48.5882	12.058	65.7452
Jiangmen City	Guangdong	202.261	4	4663	8872							20	0.016964	0.0169475	-0.0982483	17.8396	8.36524	249.706	61.969	337.88	3.43911
Heyuan City	Guangdong	112.926	2	1048	1770							75	0.00175	0.00171394	-2.06046	7.5018	3.51771	105.005	26.0589	142.084	0.0689579
Shenzhen City	Guangdong	871.1	11	20785	232113							362	0.605113	0.603604	-0.249265	59.9306	28.1024	838.868	208.18	1135.08	4.55371
Qingyuan City	Guangdong	124.457	0	0	2729							0	0.001998	0.00199751		6.73668	3.15893	94.2956	23.4011	127.592
Zhanjiang City	Guangdong	269.182	1	1655	8395							0	0.013486	0.0134857		6.12792	2.87347	85.7745	21.2864	116.062
Chaozhou City	Guangdong	159.646	0	0	14293							0	0.01216	0.0121596		2.19012	1.02698	30.6559	7.60779	41.4808
Zhuhai City	Guangdong	122.903	4	7434	14809							0	0.151194	0.151194		13.763	6.45366	192.645	47.8082	260.67
Zhaoqing City	Guangdong	168.416	3	4529	13267							10	0.004295	0.00428941	-0.136941	11.5332	5.40808	161.434	40.0626	218.438	1.59503
Maoming City	Guangdong	220.142	1	2349	2920							0	0.013161	0.0131612		7.92028	3.71394	110.863	27.5126	150.01
Yangjiang City	Guangdong	104.13	1	733	2504							0	0.005754	0.00575395		3.42392	1.60553	47.9258	11.8936	64.8488
Shaoguan City	Guangdong	134.56	3	481	896							0	0.002421	0.00242134		2.91353	1.3662	40.7816	10.1207	55.182
Beihai City	Guangxi		82	1335	521							0	0.469154	0.469154		3.98674	0.187858	19.4794	2.02465	25.6786
Nanning	Guangxi															5.41041	0.254942	26.4355	2.74765	34.8484
Nanning City	Guangxi		1	3696	8788							3	0.372772	0.372769		1.74025	0.0820018	8.50293	0.883777	11.209	12.3485
Liuzhou	Guangxi															4.88166	0.230027	23.852	2.47913	31.4428
Liuzhou City	Guangxi		1	2147	8071							2	0.13603	0.136029		3.89152	0.183371	19.0141	1.97629	25.0653	32.0334
Guilin City	Guangxi		3	1778	2482							100	0.16345	0.163421	-0.0178886	5.88397	0.277257	28.7493	2.98815	37.8987	2.11854
Wuzhou City	Guangxi															4.35381	0.205154	21.2729	2.21106	28.0429
Hechi City	Guangxi															4.86362	0.229177	23.7638	2.46997	31.3266
Yulin City	Guangxi															6.77386	0.319189	33.0973	3.44007	43.6305
Baise City	Guangxi		1	177	75							0	0.131201	0.131201		6.42243	0.30263	31.3802	3.2616	41.3669
Guigang City	Guangxi															2.50263	0.117926	12.228	1.27095	16.1195
Hezhou City	Guangxi															1.91143	0.090068	9.33933	0.970712	12.3115
Qinzhou City	Guangxi															2.90564	0.136916	14.1971	1.47561	18.7152
Fangchenggang City	Guangxi															2.81425	0.132609	13.7505	1.4292	18.1266
Liupanshui City	Guizhou															5.37356	0.84003	98.9668	11.8128	116.993
Anshun City	Guizhou															1.56349	0.244416	28.7954	3.43706	34.0404
Bijie City	Guizhou															6.71716	1.05007	123.712	14.7665	146.246
Guiyang City	Guizhou		7	5390	16671							112	0.410353	0.410029	-0.0789289	20.8849	3.26486	384.644	45.9116	454.705	5.76095
Zunyi City	Guizhou		2	1600	9232							0	0.195695	0.195695		9.01624	1.40948	166.055	19.8206	196.302
Tongren City	Guizhou															7.0294	1.09888	129.463	15.4529	153.044
Southeast Guizhou Miao & Dong A.P	Guizhou															5.88918	0.920636	108.463	12.9463	128.219
South Guizhou Buyi & Miao A.P	Guizhou															3.06485	0.479118	56.4465	6.73753	66.728
Southwest Guizhou Buyi & Miao A.P	Guizhou															3.46234	0.541255	63.7671	7.61131	75.382
Wanning City	Hainan		1	164	0							0	0	0		0.88444	0.370672	2.22295	0.417303	3.89536
Sanya City	Hainan		0	0	755							26	0.076588	0.0762256	-0.472813	2.58645	1.08399	6.50077	1.22036	11.3916	0.0240932
Dongfang City	Hainan															0.611885	0.256444	1.53791	0.288704	2.69494
Lingao County	Hainan															0.25889	0.108502	0.650693	0.122152	1.14024
Ledong Li Autonomous County	Hainan															0.183935	0.0770881	0.462302	0.0867858	0.810111
Wuzhishan City	Hainan															0.321147	0.134594	0.80717	0.151526	1.41444
Baoting Li & Miao Autonomous County	Hainan															0.164375	0.0688901	0.413139	0.0775566	0.72396
Danzhou City	Hainan															0.0208756	0.00874905	0.0524686	0.00984969	0.0919429
Anding County	Hainan															0.478454	0.200522	1.20254	0.225748	2.10727
Tunchang County	Hainan															0.16232	0.068029	0.407974	0.0765871	0.714911
Wenchang City	Hainan															0.661418	0.277203	1.6624	0.312075	2.9131
Chartgjiang Li Autonomous County	Hainan															0.416896	0.174723	1.04782	0.196703	1.83614
Haikou City	Hainan		1	8033	12143							0	0.101157	0.101157		2.90729	1.21845	7.30715	1.37174	12.8046
Chengmai County	Hainan															0.230125	0.0964462	0.578394	0.108579	1.01354
Qiongzhong Li & Miao Autonomous County	Hainan															0.154882	0.0649117	0.38928	0.0730777	0.682151
Qionghai City	Hainan															0.610272	0.255767	1.53385	0.287943	2.68784
Baisha Li Autonomous County	Hainan															0.227099	0.0951781	0.570789	0.107152	1.00022
Lingshui Li Autonomous County	Hainan															0.252069	0.105643	0.633548	0.118933	1.11019
Baoding City	Hebei		4	5587	9582							51	2.66994	2.66952	-0.0158519	32.5231	9.79759	120.327	81.3926	244.04	15.395
Tangshan City	Hebei		8	14691	94303							1881	2.07407	2.06077	-0.64138	27.0924	8.16157	100.234	67.8015	203.29	0.316957
Langfang City	Hebei		0	0	6624							0	0	0		10.886	3.2794	40.2751	27.2433	81.6838
Zhangjiakou City	Hebei		1	897	2220							0	1.73848	1.73848		16.0704	4.84122	59.4561	40.218	120.586
Chengde City	Hebei		1	270	1141							0	0	0		11.1116	3.34737	41.1099	27.808	83.3768
Cangzhou City	Hebei		1	823	37500							0	0	0		18.1353	5.46327	67.0957	45.3856	136.08
Shyiazhuang City	Hebei		10	14105	28751							400	2.28362	2.28088	-0.119727	28.9791	8.72996	107.215	72.5233	217.447	1.81619
Qinhuangdao City	Hebei		4	7675	47057							240	1.37526	1.37154	-0.270981	9.97316	3.00442	36.8979	24.9589	74.8344	0.276161
Hengshui City	Hebei		1	1980	1500							100	6.20621	6.20266	-0.057138	9.34387	2.81484	34.5697	23.384	70.1125	1.22707
Xingtai City	Hebei		4	2781	3058							765	1.87556	1.86807	-0.399488	13.6761	4.11991	50.5976	34.2258	102.619	0.256877
Handan City	Hebei		4	5925	25741							394	2.40413	2.39896	-0.21479	14.8635	4.47763	54.9908	37.1975	111.529	0.519248
Sanmenxia City	Henan	132	4	1325	37940							0	0.326135	0.326135		1.25594	2.43449	20.2952	8.58439	32.57
Xinyang City	Henan	561	1	2429	894							0	0.333252	0.333252		5.46263	10.5887	88.2726	37.3373	141.661
Nanyang City	Henan	739	2	1992	26212							0	0.471033	0.471033		2.50169	4.84923	40.4257	17.0992	64.8758
Zhoukou City	Henan	851	2	1030	7801							0	0.609785	0.609785		4.17647	8.09558	67.489	28.5463	108.307
Shangqiu City	Henan	590	2	2157	3593							0	0.922821	0.922821		5.01569	9.72231	81.0503	34.2824	130.071
Anyang City	Henan	353	2	2076	58844							1	1.60106	1.60106		2.76822	5.36586	44.7326	18.9209	71.7876	125.269
Pingdingshan City	Henan	312	2	1024	19420							1825	0.724978	0.712492	-1.72219	4.4452	8.61648	71.8315	30.3831	115.276	0.066936
Kaifeng City	Henan	316	1	1132	800							0	1.27892	1.27892		6.27588	12.165	101.414	42.8959	162.751
Xinxiang City	Henan	358	2	4132	3437							0	1.31112	1.31113		6.88808	13.3517	111.307	47.0803	178.627
Luoyang City	Henan	390	2	6120	8193							0	0.694054	0.694054		4.83945	9.3807	78.2025	33.0778	125.5
Luohe City	Henan	170	1	2889	8000							0	0.795055	0.795055		3.66437	7.10294	59.2138	25.0461	95.0272
Puyang City	Henan	250	2	3336	11294							0	3.21891	3.21891		3.63926	7.05427	58.8081	24.8745	94.3761
Jiaozuo City	Henan	200	2	4122	9738							35	1.60651	1.60614	-0.0232512	10.1965	19.7646	164.768	69.6931	264.422	11.3724
Xuchang City	Henan	299	4	6404	51322							19	0.918116	0.917915	-0.02195	4.4542	8.63393	71.977	30.4446	115.51	5.26238
Zhengzhou City	Henan	261	8	4630	30981							1461	1.53131	1.51743	-0.906496	2.86776	5.55881	46.3411	19.6012	74.3689	0.08204
Zhumadian City	Henan	667	1	2372	10600							0	0.201175	0.201175		4.10216	7.95155	66.2883	28.0384	106.38
Hebi City	Henan	81	2	1611	1067							9	1.50378	1.50352	-0.0173879	1.8597	3.6048	30.0515	12.7111	48.2271	2.77359
Qitaihe City	Heilongjiang		1	146	15							0	0.067615	0.0676154		1.869	4.42519	62.5204	5.7085	74.5231
Yichun City	Heilongjiang															1.53352	3.63087	51.298	4.68383	61.1462
Jiamusi City	Heilongjiang		1	168	48							0	0.023907	0.0239069		5.70345	13.5039	190.787	17.4201	227.415
Shuangyashan City	Heilongjiang															1.19694	2.83396	40.0391	3.65582	47.7258
Harbin City	Heilongjiang		2	12272	36000							405	0.040685	0.0402397	-1.09451	22.8718	54.153	765.089	69.8574	911.971	0.833226
Daxing'anling Prefecture	Heilongjiang															0.962224	2.27823	32.1876	2.93893	38.367
Daqing City	Heilongjiang		3	2546	46115							200	0.244217	0.243141	-0.440529	21.9078	51.8707	732.844	66.9133	873.536	1.98293
Mudanjiang City	Heilongjiang															9.40715	22.2731	314.681	28.7323	375.093
Suihua City	Heilongjiang															6.50412	15.3997	217.571	19.8656	259.34
Jixi City	Heilongjiang															3.28103	7.76842	109.755	10.0213	130.825
Hegang City	Heilongjiang
Heihe City	Heilongjiang															6.45728	15.2888	216.004	19.7225	257.473
Qiqihar City	Heilongjiang		1	1155	2135							0	0.021313	0.0213131		7.74265	18.3321	259.001	23.6484	308.724
Shiyan City	Hubei		2	2985	4622							0	0.163374	0.163374		9.52743	6.05213	88.7161	28.6415	132.937
Xianning City	Hubei															3.85901	2.45137	35.9338	11.601	53.8452
Xiaogan City	Hubei															5.79433	3.68074	53.9547	17.419	80.8488
Yichang City	Hubei		5	1996	11021							0	0.175594	0.175594		6.93963	4.40827	64.6194	20.862	96.8293
Enshi Tujia & Miao A.P	Hubei		1	1168	17762							0	0	0		4.83511	3.07141	45.0228	14.5354	67.4647
Wuhan City	Hubei		8	31293	66192							23	1.61038	1.61028	-0.00623137	24.1132	15.3175	224.534	72.4895	336.454	53.9935
Administrative units directly under the Jurisdiction	Hubei		0	0	500							0	0	0		4.98132	3.16429	46.3843	14.9749	69.5048
Jingzhou City	Hubei		3	1125	524							0	0.502208	0.502208		4.29989	2.73143	40.0391	12.9264	59.9968
Jingmen City	Hubei		1	1800	2190							0	0.568348	0.568348		3.53165	2.24342	32.8855	10.6169	49.2774
Xiangyang City	Hubei		3	5258	13429							0	0.628091	0.628091		4.75436	3.02012	44.271	14.2927	66.3381
Ezhou City	Hubei		1	1642	0							0	1.26306	1.26306		1.61888	1.02837	15.0745	4.86671	22.5884
Suizhou City	Hubei		1	37	0							0	0.627566	0.627566		1.12302	0.713376	10.4571	3.37603	15.6696
Huanggang City	Hubei															4.07906	2.59115	37.9827	12.2625	56.9155
Huangshi City	Hubei		2	3289	3086							0	0.570396	0.570396		3.64681	2.31657	33.9578	10.9631	50.8842
Loudi City	Hunan															7.60281	4.32805	61.2698	15.7863	88.9869
Yueyang City	Hunan	232.31	2	3140	2192							0	0.3698	0.3698		10.3706	5.90368	83.5749	21.5332	121.382
Changde City	Hunan	212.98	0	0	493							0	0.379937	0.379937		10.5218	5.98973	84.7932	21.8471	123.152
Zhangjiajie City	Hunan	55.05	3	531	15							230	0.093427	0.0930317	-0.423573	2.74995	1.56546	22.1614	5.70992	32.1867	0.0759886
Huaihua City	Hunan															12.4066	7.0627	99.9826	25.7607	145.213
Zhuzhou City	Hunan	174.34	2	4501	10197							0	0.196126	0.196126		10.9785	6.24971	88.4736	22.7954	128.497
Yongzhou City	Hunan	174.41	1	702	2056							0	0.115091	0.115091		8.02523	4.56852	64.6739	16.6634	93.9311
Xiangtan City	Hunan	132.7	2	2346	300							270	0.419726	0.41914	-0.139751	4.12255	2.34684	33.2229	8.55995	48.2523	0.345272
West Hunan Tujia & Miao A.P	Hunan	82.26	2	912	2737							0	0	0		6.02693	3.43095	48.57	12.5141	70.542
Yiyang City	Hunan	162.05	1	1656	8640							0	0.202775	0.202775		5.98164	3.40517	48.205	12.4201	70.0119
Hengyang City	Hunan															12.5114	7.12234	100.827	25.9782	146.439
Shaoyang City	Hunan															7.18948	4.09276	57.9388	14.928	84.1491
Chenzhou City	Hunan	179.68	1	1432	0							0	0.098521	0.0985209		7.11819	4.05217	57.3642	14.78	83.3146
Changsha City	Hunan	355.27	4	11123	31926							58	0.330716	0.330658	-0.0174331	13.0242	7.41428	104.96	27.0431	152.441	8.74435
Jilin City	Jilin		2	5528	38797							0	0.115986	0.115986		13.6252	24.1031	331.133	45.4956	414.357
Siping City	Jilin		0	0	0							0	0.016037	0.0160371		5.80041	10.261	140.968	19.3681	176.397
Yanbian Korean A.P	Jilin															4.5281	8.01025	110.047	15.1197	137.705
Songyuan City	Jilin		1	528	9675							0	0.033757	0.0337573		6.31831	11.1772	153.554	21.0974	192.147
Baicheng City	Jilin															2.78833	4.93259	67.765	9.31047	84.7964
Baishan City	Jilin															1.49446	2.64372	36.32	4.99013	45.4483
Liaoyuan City	Jilin		1	558	0							0	0.032238	0.0322384		4.74613	8.39597	115.346	15.8477	144.335
Tonghua City	Jilin															4.8631	8.60288	118.188	16.2383	147.893
Changchun City	Jilin		3	10209	12196							0	0.089874	0.0898741		3.88038	6.86444	94.3051	12.9569	118.007
Nanjing City	Jiangsu	549.22	9	11462	79375							61	0.478623	0.478375	-0.051869	9.69133	0.404688	102.061	39.5016	151.658	2.92387
Nantong City	Jiangsu	339.99	10	8231	30036							5	0.054503	0.0544849	-0.0336732	20.8723	0.871581	219.809	85.075	326.628	9.69955
Suqian City	Jiangsu	158.1	1	126	2994							0	0.008996	0.00899555		4.85797	0.202858	51.1599	19.801	76.0217
Changzhou City	Jiangsu	257.54	17	13083	81288							35	0.196805	0.196581	-0.113992	22.1592	0.925319	233.362	90.3204	346.766	3.04203
Xuzhou City	Jiangsu	392.66	18	10477	66120							240	0.046497	0.045786	-1.52876	12.9396	0.540331	136.269	52.7417	202.491	0.132454
Yangzhou City	Jiangsu	219.39	4	3894	7243							0	0.038343	0.0383433		7.77054	0.324481	81.8327	31.6726	121.6
Wuxi City	Jiangsu	391.98	40	21157	237071							223	0.150591	0.149453	-0.755702	38.3893	1.60305	404.283	156.474	600.749	0.794955
Taizhou City	Jiangsu	213.65	2	440	4701							2	0.025113	0.0251032	-0.0383628	9.37978	0.391679	98.7798	38.2318	146.783	3.8259
Huai'an City	Jiangsu	188.85	4	3812	12126							10	0.012697	0.0126801	-0.133299	6.01753	0.251279	63.3714	24.5273	94.1675	0.706445
Yancheng City	Jiangsu	326.71	4	2128	8711							14	0.012081	0.0120643	-0.142433	10.1426	0.423532	106.813	41.3409	158.72	1.11433
Suzhou City	Jiangsu	527.06	58	24446	336906							861	0.152621	0.14913	-2.28776	59.7558	2.49527	629.297	243.563	935.111	0.408744
Lianyungang City	Jiangsu	175.7	4	3853	14749							0	0.033822	0.033822		5.80534	0.242418	61.1368	23.6624	90.847
Zhenjiang City	Jiangsu	177.34	5	6141	5142							2	0.100955	0.100941	-0.0141478	10.8349	0.452442	114.104	44.1629	169.554	11.9849
Shangrao City	Jiangxi		0	0	43							2	0.00137	0.00136954	-0.0665475	6.63373	3.38257	57.0906	0.682167	67.7891	1.01955
Jiujiang City	Jiangxi		1	1625	0							0	0.019468	0.0194679		8.95581	4.56661	77.0746	0.920952	91.5179
Nanchang City	Jiangxi		2	9790	20502							0	0.053042	0.0530423		14.3589	7.32168	123.574	1.47657	146.732
Jian City	Jiangxi															6.02395	3.07164	51.8428	0.619461	61.5578
Yichun City	Jiangxi															14.6902	7.49059	126.425	1.51063	150.117
Fuzhou City	Jiangxi															5.46862	2.78847	47.0635	0.562355	55.883
Xinyu City	Jiangxi															3.30377	1.6846	28.4325	0.339736	33.7607
Jingdezhen City	Jiangxi															2.10038	1.07099	18.0761	0.215988	21.4634
Pingxiang City	Jiangxi															1.60227	0.817006	13.7893	0.164766	16.3734
Ganzhou City	Jiangxi															9.79673	4.9954	84.3117	1.00743	100.111
Yingtan City	Jiangxi															1.99649	1.01802	17.182	0.205305	20.4018
Dandong City	Liaoning															3.57494	1.37621	15.49	20.37	40.8111
Dalian City	Liaoning		6	10113	60972							1197	0	0		9.31963	3.58771	40.3814	53.1033	106.392
Fushun City	Liaoning		1	4225	23260							0	0	0		3.26762	1.25791	14.1584	18.6189	37.3028
Chaoyang City	Liaoning															3.15731	1.21544	13.6804	17.9904	36.0436
Benxi City	Liaoning		1	3324	18944							3324	0	0		3.54244	1.36371	15.3492	20.1849	40.4402
Shenyang City	Liaoning		8	18907	55878							5000	0	0		16.7466	6.44679	72.5619	95.422	191.177
Panjin City	Liaoning		1	1722	7100							0	0	0		6.39253	2.46088	27.6985	36.4247	72.9765
Yingkou City	Liaoning		0	0	1570							0	0.096219	0.096219		6.49465	2.50019	28.1409	37.0066	74.1423
Huludao City	Liaoning		2	1932	720							473	0	0		2.23546	0.860568	9.68612	12.7377	25.5198
Liaoyang City	Liaoning		1	2934	20822							0	0	0		1.50272	0.57849	6.51119	8.5625	17.1549
Tieling City	Liaoning		1	1277	0							1277	0	0		2.04461	0.787097	8.85917	11.6502	23.3411
Jinzhou City	Liaoning		1	3217	13072							0	0	0		5.33625	2.05425	23.1217	30.406	60.9182
Fuxin City	Liaoning															1.13409	0.43658	4.91392	6.46202	12.9466
Anshan City	Liaoning		2	1789	200							0	0.044358	0.0443575		4.61056	1.77489	19.9773	26.271	52.6337
Ulanqab City	Inner Mongolia		1	101	20							0	0.593716	0.593716		3.48912	3.20247	45.1448	9.81448	61.6509
Wuhai City	Inner Mongolia		1	1107	10800							0	11.56	11.56		2.31224	2.12228	29.9175	6.50407	40.8561
Xingan League	Inner Mongolia		1	1061	300							0	0	0		2.71788	2.49459	35.166	7.64508	48.0235
Baotou City	Inner Mongolia		4	3575	12211							529	1.28986	1.28347	-0.495318	16.9217	15.5315	218.946	47.5988	298.998	0.603648
Hulunbuir City	Inner Mongolia		3	2400	6321							0	0.029308	0.0293078		4.8159	4.42025	62.3117	13.5466	85.0945
Hohhot City	Inner Mongolia		3	3876	23300							247	0.930676	0.928536	-0.229981	9.38897	8.61763	121.482	26.4101	165.898	0.721355
Bayannur City	Inner Mongolia		1	1209	550							0	12.1593	12.1593		6.78597	6.22848	87.8021	19.0882	119.905
Chifeng City	Inner Mongolia		2	2346	4566							0	0.744825	0.744825		8.58826	7.8827	111.121	24.1578	151.75
Tongliao City	Inner Mongolia		2	2027	34000							0	1.09388	1.09388		5.89608	5.4117	76.288	16.585	104.181
Erdos City	Inner Mongolia		3	1398	32870							134	0.934196	0.933474	-0.0773671	11.7792	10.8115	152.408	33.1334	208.132	2.69018
Xilingol League	Inner Mongolia		1	180	240							0	0	0		1.7414	1.59834	22.5315	4.89835	30.7696
Alxa League	Inner Mongolia		1	75	1							74	2.58333	2.58105	-0.088411	3.1669	2.90672	40.9757	8.90812	55.9574	0.632924
Wuzhong City	Ningxia		3	1951	4320							0	23.4542	23.4542		3.30088	0.20174	18.3646	6.48714	28.3543
Guyuan City	Ningxia															0.808555	0.0494165	4.49843	1.58903	6.94543
Shizuishan City	Ningxia		2	2081	16183							100	7.08269	7.07714	-0.0783515	1.4729	0.0900193	8.19454	2.89466	12.6521	0.161479
Yinchuan City	Ningxia		3	5582	6429							78	12.8658	12.8619	-0.0302372	4.21467	0.257588	23.4485	8.283	36.2038	1.19732
Haidong City	Qinghai															2.22673	0.0701924	3.07162	1.16778	6.53633
Haibei Zang A.P	Qinghai															0.236496	0.00745498	0.32623	0.124028	0.694209
Hainan Zang A.P	Qinghai															0.441709	0.0139239	0.609308	0.23165	1.29659
Haixi Mongolian & Zang A.P	Qinghai															2.30465	0.0726486	3.17911	1.20865	6.76505
Xining City	Qinghai		1	2600	2817							0	0.730959	0.730959		8.27054	0.26071	11.4087	4.3374	24.2773
Dongying City	Shandong		2	2206	3511							596	0.403379	0.384577	-4.66095	7.94166	3.99971	100.977	23.4357	136.354	0.0292545
Linyi City	Shandong		5	5444	14764							0	0	0		13.6625	6.88095	173.716	40.3179	234.578
Weihai City	Shandong		8	5141	32991							16	0.055556	0.0554229	-0.238806	5.95798	3.00065	75.7544	17.5819	102.295	0.42836
Dezhou City	Shandong		6	4420	20229							612	0.064761	0.0568645	-12.1937	9.02867	4.54716	114.798	26.6435	155.017	0.0127129
Rizhao City	Shandong		2	3224	4260							5	0.111207	0.111121	-0.0775195	7.39385	3.72381	94.0112	21.8191	126.948	1.63763
Zaozhuang City	Shandong		2	4596	3027							0	0	0		6.51145	3.2794	82.7917	19.2152	111.798
Taian City	Shandong		7	5638	8878							837	0.049283	0.0422194	-14.3322	7.50829	3.78145	95.4663	22.1568	128.913	0.00899464
Jinan City	Shandong		5	14126	64821							125	0.283306	0.282364	-0.332244	15.0218	7.5655	190.998	44.3289	257.915	0.776282
Jining City	Shandong		9	9544	48475							346	0.040123	0.0386551	-3.65867	13.3174	6.7071	169.327	39.2993	228.651	0.0624957
Zibo City	Shandong		8	15329	96758							781	0.377978	0.365832	-3.21346	11.6473	5.866	148.093	34.371	199.977	0.062231
Binzhou City	Shandong		5	5298	34732							0	0	0		8.46874	4.26516	107.678	24.9911	145.403
Weifang City	Shandong		10	13809	117821							0	0	0		14.3855	7.24507	182.909	42.4514	246.991
Yantai City	Shandong		10	13755	92615							493	0.071126	0.0675436	-5.03729	10.9856	5.53274	139.679	32.4183	188.616	0.0374439
Liaocheng City	Shandong		4	5085	4690							238	0.114732	0.10942	-4.63035	8.4055	4.23331	106.874	24.8045	144.317	0.0311677
Laiwu City	Shandong		1	2336	949							365	0.214012	0.202918	-5.18392	1.42191	0.716126	18.0793	4.19604	24.4134	0.00470944
Heze City	Shandong		1	1820	2553							0	0	0		5.80081	2.9215	73.7561	17.1181	99.5965
Qingdao City	Shandong		14	19307	107560							741	0.433379	0.423201	-2.34865	33.4367	16.8399	425.141	98.6712	574.089	0.244433
Linfen City	Shanxi	148.31	2	2638	12360	2638						0	0.025064	0.025064		13.1644	8.42826	135.423	21.0766	178.093
Luliang City	Shanxi															15.168	9.71103	156.035	24.2844	205.198
Datong City	Shanxi	154.18	3	3349	8839	3349					692	2809	0.199917	0.149428	-25.255	11.7406	7.51668	120.776	18.797	158.831	0.00628908
Taiyuan City	Shanxi	279.06	6	9513	82069	9513					657	478	0.724699	0.698689	-3.58909	19.3582	12.3937	199.139	30.993	261.884	0.0729668
Xinzhou City	Shanxi															10.4546	6.69335	107.547	16.7381	141.433
Jinzhong City	Shanxi	125.75	1	1073	0	1073						0	0.03658	0.0365803		6.95926	4.45553	71.5905	11.142	94.1473
Jincheng City	Shanxi	93.45	2	2615	2565	2100				515		420	0.026724	0.0224007	-16.1787	9.72785	6.22807	100.071	15.5746	131.602	0.00813425
Shuozhou City	Shanxi	65.05	0	0	3694							273	0.20668	0.20096	-2.76764	3.8118	2.44043	39.2123	6.1028	51.5674	0.0186323
Yuncheng City	Shanxi															14.1289	9.04578	145.346	22.6208	191.141
Changzhi City	Shanxi	125.06	2	3207	13976	3207					2847	356	0.083844	0.0781208	-6.8257	10.4996	6.72215	108.01	16.8101	142.042	0.0208099
Yangquan City	Shanxi	73.56	1	2045	14015					2045		560	0.159778	0.141807	-11.2472	6.30063	4.03386	64.8152	10.0875	85.2372	0.0075785
Xianyang City	Shaanxi		4	1842	3761							20	0.211698	0.211321	-0.178253	5.51461	17.7328	70.1794	13.8726	107.299	0.60195
Shangluo City	Shaanxi															0.417252	1.34172	5.30998	1.04964	8.11859
Ankang City	Shaanxi															0.733352	2.35817	9.3327	1.84482	14.269
Baoji City	Shaanxi		1	2417	23725							562	0.011178	0.00894925	-19.9361	2.76693	8.89734	35.2122	6.9605	53.8369	0.00270047
Yan'an City	Shaanxi		1	775	730							0	0.013775	0.0137748		4.88776	15.7171	62.2021	12.2957	95.1027
Yulin City	Shaanxi															6.24866	20.0932	79.521	15.7192	121.582
Hanzhong City	Shaanxi		1	959	6643							0	0.002791	0.00279072		0.404608	1.30106	5.14907	1.01783	7.87257
Weinan City	Shaanxi		1	1409	11592							1	0.016316	0.0163059	-0.0608613	4.22562	13.5879	53.7756	10.63	82.2192	1.35086
Xi'an City	Shaanxi		2	9113	50845							365	0.164354	0.162269	-1.26904	7.52395	24.194	95.7505	18.9273	146.396	0.11536
Tongchuan City	Shaanxi		1	320	900							0	0.041211	0.0412109		2.32945	7.49057	29.6447	5.85997	45.3247
Shanghai	Shanghai	1742	35	36322	315178							424	4.28973	4.28819	-0.0357601	64.8987	14.9951	361.563	591.749	1033.21	28.8927
Leshan City	Sichuan		1	1638	60							0	0.153528	0.153528		2.20601	0.64501	12.5597	12.5242	27.9349
Neijiang City	Sichuan		1	980	948							37	0.567518	0.567181	-0.0594855	2.83073	0.827671	16.1165	16.071	35.8459	0.602598
Liangshan Yi A.P	Sichuan		1	274	298							274	0.048414	0.0483179	-0.197548	1.40165	0.409825	7.98016	7.95762	17.7493	0.0898475
Nanchong City	Sichuan		1	604	730							0	0.486185	0.486185		3.56703	1.04296	20.3086	20.2512	45.1698
Yibin City	Sichuan															2.75082	0.804308	15.6616	15.6173	34.834
Bazhong City	Sichuan		1	930	6600							5	0.068049	0.0680366	-0.017921	1.28774	0.376519	7.33161	7.3109	16.3068	0.909918
Guangyuan City	Sichuan		1	1387	10							0	0.101344	0.101344		1.30701	0.382154	7.44134	7.42032	16.5508
Guangan City	Sichuan		1	301	0							101	0.60403	0.603587	-0.0732414	2.50847	0.733446	14.2817	14.2414	31.765	0.433703
Deyang City	Sichuan		1	2880	1800							0	0.971556	0.971556		3.40642	0.995997	19.3942	19.3394	43.1359
Chengdu City	Sichuan		13	19648	143648							1661	0.791735	0.789001	-0.345394	36.325	10.621	206.813	206.229	459.988	1.33178
Panzhihua City	Sichuan		2	1245	655							0	0.183952	0.183952		2.37047	0.693097	13.4961	13.4579	30.0176
Luzhou City	Sichuan		1	1013	47450							15	0.139842	0.13981	-0.0228658	5.65695	1.65403	32.2074	32.1164	71.6347	3.13283
Ganzi Zang A.P	Sichuan															0.283252	0.0828197	1.61267	1.60812	3.58686
Meishan City	Sichuan		1	720	970							0	0.108701	0.108701		1.73528	0.507374	9.87964	9.85173	21.974
Mianyang City	Sichuan		3	475	27796							54	0.256281	0.2562	-0.0313223	3.31187	0.968351	18.8558	18.8026	41.9386	1.33893
Zigong City	Sichuan		1	1997	2875							1997	0.775388	0.751529	-3.07704	1.58013	0.462012	8.99635	8.97093	20.0094	0.00650281
Ziyang City	Sichuan															2.44137	0.713828	13.8997	13.8605	30.9154
Dazhou City	Sichuan		1	1440	1260							0	0.114565	0.114565		2.96885	0.868057	16.9029	16.8551	37.5949
Suining City	Sichuan		2	1695	5660							0	0.826546	0.826546		0.960975	0.280978	5.47122	5.45577	12.1689
Aba Zang & Qiang A.P	Sichuan		1	60	300							0	0	0		1.69041	0.494256	9.6242	9.59701	21.4059
Yaan City	Sichuan		1	1013	10950							0	0.043962	0.0439618		1.54904	0.45292	8.81931	8.79439	19.6157
Tianjin	Tianjin	814	11	24012	109584							682	2.27102	2.26427	-0.297038	25.8542	4.49222	169.593	208.777	408.717	1.37597
Urumqi City	Xinjiang	196.67	4	7338	3757							840	0.968487	0.959664	-0.911063	9.01801	1.61589	49.0613	43.0179	102.713	0.11274
Ili	Xinjiang	243.15	2	1533	45625							0	0	0		1.64607	0.294952	8.95524	7.85214	18.7484
Karamay City	Xinjiang	26.22	2	1650	5003							516	11.1667	11.0438	-1.10021	2.23594	0.400647	12.1643	10.6659	25.4668	0.0231471
Bortala Mongolian A.P	Xinjiang															0.296164	0.0530683	1.61124	1.41277	3.37324
Turpan Prefecture	Xinjiang	42.51	0	0	334							130	1.4578	1.45614	-0.114035	1.34593	0.24117	7.32232	6.42036	15.3298	0.13443
Hotan Prefecture	Xinjiang	59.34	0	0	0							0	0	0		1.74397	0.312494	9.48785	8.31914	19.8635
Hami Prefecture	Xinjiang	47.67	1	390	180							390	0.823485	0.82053	-0.358786	1.33625	0.239436	7.26968	6.3742	15.2196	0.0424197
Kashi Prefecture	Xinjiang															1.41195	0.253001	7.68152	6.73532	16.0818
Tacheng Prefecture	Xinjiang	72.58	1	219	7230							36	0.323259	0.323203	-0.0170857	1.02291	0.183291	5.56503	4.87953	11.6508	0.681893
Bayingolin Mongolian A.P	Xinjiang	91.99	2	659	7882							1150	0.296283	0.295483	-0.270143	1.87597	0.336147	10.206	8.9488	21.3669	0.0790947
Changji Hui A.P	Xinjiang	136.16	0	0	255							0	0	0		2.73337	0.48978	14.8705	13.0388	31.1325
Aksu Prefecture	Xinjiang	151.35	1	1531	180							0	0	0		1.48642	0.266344	8.08666	7.09054	16.93
Altay Prefecture	Xinjiang	35.27	0	0	14							0	0	0		0.283263	0.0507565	1.54105	1.35123	3.2263
Lincang City	Yunnan															1.16753	0.699307	98.4625	5.3224	105.652
Lijiang City	Yunnan	32.9	1	758	4800							0	0.004449	0.00444915		4.01378	2.4041	338.497	18.2975	363.213
Baoshan City	Yunnan	55.1	1	622	0							622	0.00252	0.0019604	-22.2143	1.03369	0.619138	87.1746	4.71223	93.5397	0.00421079
Dali Bai A.P	Yunnan	92.4	3	796	7051							4	0	0		3.70587	2.21967	312.53	16.8938	335.35
Dehong Dai & Jingpo A.P	Yunnan															2.40404	1.43993	202.742	10.9592	217.545
Wenshan Zhuang & Miao A.P	Yunnan	74.6	1	70	0							0	0	0		0.177719	0.106447	14.9877	0.810163	16.0821
Kunming City	Yunnan	363	9	17597	108877							8681	0.1136	0.096238	-15.2835	34.9044	20.9064	2943.62	159.117	3158.55	0.206664
Zhaotong City	Yunnan	88	1	764	4482							53	0.003715	0.00366047	-1.47221	2.81718	1.68738	237.583	12.8426	254.93	0.17316
Pu'er City	Yunnan
Qujing City	Yunnan	165.2	2	2087	7060							18	0.008927	0.00890873	-0.202245	4.31748	2.586	364.109	19.6819	390.695	1.93177
Chuxiong Yi A.P	Yunnan	72.1	1	1170	10198							0	0	0		2.3004	1.37785	194.001	10.4867	208.166
Yuxi City	Yunnan	76.3	6	1304	1932							189	0.028693	0.0281563	-1.87129	3.4844	2.08702	293.853	15.8842	315.308	0.168498
Honghe Hani & Yi A.P	Yunnan	134.7	4	1729	5113							9	0	0		3.96291	2.37363	334.207	18.0656	358.609
Xishuangbanna Dai A.P	Yunnan	35	1	667	253							0	0	0		1.59579	0.955814	134.579	7.27466	144.405
Diqing Zang A.P	Yunnan	7.9	1	52	0							0	0	0		0.703505	0.421372	59.3292	3.20704	63.6611
Lishui City	Zhejiang	88.764	1	1188	7035	1188					1188	0	0.037761	0.0377411	-0.0533774	6.41955	4.33908	84.2716	16.4786	111.509	2.08909
Taizhou City	Zhejiang	290.841	6	7082	65982	4176	2906				2778	611	0.177998	0.176726	-0.714621	15.8556	10.717	208.141	40.7002	275.414	0.385399
Jiaxing City	Zhejiang	196.207	7	14476	52612	787	11970		1719			11	1.75242	1.75233		13.3682	9.03577	175.489	34.3153	232.208	49.7558
Ningbo City	Zhejiang	423.847	19	13980	52131	7445	5805		730		3475	1220	0.367565	0.363078	-1.22071	27.6194	18.6684	362.569	70.8973	479.755	0.393014
Hangzhou City	Zhejiang	532.511	12	21310	134501	21310					5943	1016	0.443726	0.440418	-0.745619	44.5855	30.136	585.289	114.448	774.458	1.03868
Wenzhou City	Zhejiang	469.836	3	5508	17308	1800	3708				720	0	0.102431	0.102389	-0.0413701	20.2322	13.6752	265.594	51.9347	351.436	8.49509
Huzhou City	Zhejiang	132.816	10	5951	69546	5951					3347	0	0.656654	0.649066	-1.15554	18.4607	12.4779	242.34	47.3875	320.666	0.277502
Shaoxing City	Zhejiang	251.888	2	4088	20230	1387	2701				1387	15	0.480085	0.478476	-0.335134	6.57124	4.4416	86.2629	16.868	114.144	0.340591
Zhoushan City	Zhejiang	62.8108	1	601	8962		601					0	0.245455	0.245455		4.39019	2.9674	57.6315	11.2693	76.2585
Quzhou City	Zhejiang	85.8089	1	912	3000	912						0	0.166778	0.166778		7.31237	4.94254	95.9919	18.7704	127.017
Jinhua City	Zhejiang	282.606	6	6961	35013	6961					2502	1460	0.252533	0.249789	-1.08649	16.9612	11.4643	222.655	43.5383	294.619	0.271166
Chongqing	Chongqing	1311	35	14236	114133							126	0.19247	0.192437	-0.0172131	43.7904	2.08317	95.0749	201.761	342.709	19.9098

## Sheet:  cities_WWTPs inventory (2010)
city	province	population	number_wwtps	wastewater	sludge_disposal	effluent_river	effluent_sea	effluent_irrigation	effluent_recharge	effluent_others	effluent_I_B	relcaimed_water	wsi	wsi'	deltawsi	CI_construction	CI_relcaimed_water	CI_wastewater	CI_sludge_disposal	CI_total	CIWSA
Bozhou City	Anhui	141.455	4	4308	24187	4623.1					1445.5	0	0.009982	0.00991957	-0.629995	14.6353	2.35998	28.1949	17.5492	62.7394	0.0995868
Liuan City	Anhui	201.686	7	5098	32008	4799.27					2700.69	0	0.002604	0.00259897	-0.207114	21.4277	3.45526	41.2805	25.6939	91.8574	0.44349
Hefei City	Anhui	390.998	7	14338	149474	14324.7		200.75			14324.7	0	0.083153	0.0793949	-4.5199	85.3702	13.7662	164.466	102.367	365.97	0.0809685
Anqing City	Anhui	195.673	1	4680	4283	5278.46					5071.94	0	0.004352	0.00433691	-0.343394	32.9823	5.31848	63.5406	39.5491	141.391	0.411736
Xuancheng City	Anhui	109.738	5	2727	10762	2547.35					2826.4	0	0.001821	0.00181638	-0.249598	20.598	3.32148	39.6822	24.6991	88.3008	0.353786
Suzhou City	Anhui	168.367	5	5387	27747	4518.7			476.575		518.425	0	0.025257	0.0252053	-0.204491	33.2255	5.3577	64.0091	39.8407	142.433	0.696521
Chaohu City	Anhui	158.051	5	5165	18195	4460.98					914	2	0.007018	0.00700315	-0.205271	20.8967	3.36965	40.2576	25.0573	89.5813	0.436411
Chizhou City	Anhui	62.4335	5	1406	3844	1810.2					726.085	0	0.001575	0.00157347	-0.0703682	16.2915	2.62704	31.3856	19.5351	69.8392	0.991895
Huaibei City	Anhui	115.377	3	4592	18900	4800.88					1995.77	0	0.085059	0.0823071	-3.23486	17.3017	2.78993	33.3317	20.7464	74.1697	0.0229283
Huainan City	Anhui	146.997	3	5511	28919	5372.3					5326.12	0	0.11543	0.107191	-7.13708	23.6263	3.8098	45.5162	28.3303	101.283	0.0141911
Chuzhou City	Anhui	163.964	4	4203	23643	6252.48					4965.88	0	0.005223	0.00516692	-1.07424	26.8666	4.33231	51.7586	32.2158	115.173	0.107213
Wuhu City	Anhui	148.518	5	5032	32612	6682.07					6027.38	0	0.042162	0.0413158	-2.00627	39.7975	6.41745	76.6701	47.7212	170.606	0.0850367
Bengbu City	Anhui	142.605	5	10756	52725	10197.1					5468.05	0	0.083343	0.0807458	-3.11627	47.2725	7.6228	91.0706	56.6844	202.65	0.0650299
Tongling City	Anhui	53.214	2	2564	3643	1892.21					706.71	0	0.147239	0.146057	-0.803018	14.561	2.34799	28.0518	17.4601	62.4208	0.0777327
Fuyang City	Anhui	242.887	6	6561	43677	6981.62					4369.12	0	0.018247	0.0179783	-1.47123	34.9633	5.63791	67.3568	41.9244	149.882	0.101875
Maanshan City	Anhui	94.3914	4	8785	45882	7069.95					4234.95	3052	0.198185	0.160234	-19.1493	30.697	4.94996	59.1378	36.8087	131.593	0.00687199
Huangshan City	Anhui	55.844	4	2585	12312	2224.35				219.5	1321.69	0	0.001737	0.00173494	-0.0943236	16.3582	2.63779	31.5141	19.6151	70.1251	0.743128
Beijing	Beijing	1686	79	45433	316761	38802.3			34.6	299.3	30672.8	26451	1.52498	1.24493	-18.3644	274.205	651.47	573.238	960.956	2459.87	0.133948
Sanming City	Fujian	127.98	7	3008	9327	3400.88					2643.99	0	0.040603	0.0405707	-0.0801709	21.6732	2.7939	155.889	54.1264	234.482	2.92478
Nanping City	Fujian	134.23	10	3769	12330	2984.99				65.5	2517.11	0	0.038211	0.0381896	-0.0552463	15.3798	1.98261	110.622	38.4093	166.394	3.01189
Xiamen City	Fujian	311.91	10	19927	114535	0	19604.5		34.675		0	26	0.124108	0.123923	-0.149426	9.55365	1.23156	68.7163	23.8592	103.361	0.691722
Ningde City	Fujian	135.23	14	3161	33320	2182.13	1468.1			6.5	821.25	44	0.045969	0.0459263	-0.0922302	16.436	2.11877	118.219	41.0471	177.821	1.92799
Quanzhou City	Fujian	474.95	22	25215	146468	10327.7	10995.4		1673.53	33	9920.53	20	0.080641	0.0799657	-0.837592	64.3308	8.29289	462.711	160.659	695.993	0.830945
Zhangzhou City	Fujian	224.76	11	5357	23714	5071.59	286.457				4482.11	9	0.101516	0.101149	-0.361502	26.5307	3.42008	190.827	66.2574	287.035	0.794006
Fuzhou City	Fujian	440.81	14	12262	126874	15896.3	1180.11				15773.7	82	0.087481	0.0863916	-1.24544	57.1385	7.36574	410.979	142.697	618.181	0.496354
Putian City	Fujian	141.1	3	4653	20104	3146.28	1552.5				2894.6	0	0.119102	0.118318	-0.658619	10.8152	1.39419	77.7901	27.0097	117.009	0.177658
Longyan City	Fujian	115.22	4	4465	15510	4874.31					2508.62	0	0.047401	0.0473505	-0.105492	4.75105	0.612458	34.1728	11.8652	51.4015	0.487254
Linxia Hui A.P	Gansu	47.3	2	670	4333	553.5					553.5	0	0.670439	0.663733	-1.00032	9.58356	1.21962	22.5919	16.2276	49.6227	0.049607
Lanzhou City	Gansu	275.86	4	11011	57100	9880.09					2644.78	66	15.442	12.2972	-20.3651	41.5234	5.28435	97.8858	70.3108	215.004	0.0105575
Jiayuguan City	Gansu	21.64	1	584	4272	0			2148.45		0	0	21.4255	21.4255		19.0516	2.42454	44.9115	32.2597	98.6473
Tianshui City	Gansu	92.53	1	1241	16309	1205					0	10	0.293599	0.293526	-0.0246081	9.84546	1.25295	23.2093	16.6711	50.9788	2.07163
Dingxi City	Gansu	63.19	3	698	5052	511.51		146			0	0	0.816707	0.813007	-0.453009	11.4532	1.45756	26.9993	19.3935	59.3036	0.13091
Pingliang City	Gansu	60.15	1	602	1223	485.5					0	0	0.518042	0.518042		13.1734	1.67647	31.0545	22.3063	68.2106
Qingyang City	Gansu	52.61	1	298	890	349.8					0	0	0.438491	0.438491		5.06574	0.644676	11.9418	8.57771	26.2299
Zhangye City	Gansu	41.79	1	1097	2989	1239.85					0	0	0.679863	0.679863		8.99002	1.14409	21.1927	15.2226	46.5494
Wuwei City	Gansu	50.03	2	1279	8942	1342.67					0	7	1.80822	1.80815		17.5801	2.23728	41.4426	29.768	91.028	22.9799
Gannan Zang A.P	Gansu	16.86	1	146	820	131.5					0	0	0.007069	0.00706851		1.78754	0.227486	4.21388	3.02681	9.25572
Baiyin City	Gansu	67.46	1	949	13353	916.8					0	26	4.7103	4.70896	-0.0285247	6.09469	0.775622	14.3674	10.32	31.5577	1.10633
Jiuquan City	Gansu	54.85	4	1021	2835	729.27			182.5		729.27	0	0.854608	0.852618	-0.232905	17.8963	2.27752	42.188	30.3034	92.6652	0.397867
Jinchang City	Gansu	28.82	1	1254	3678	0		1195.5			0	1064	7.80565	7.67502	-1.67356	12.448	1.58415	29.3444	21.0779	64.4544	0.0385133
Longnan City	Gansu	50.59	2	476	1320	388					0	0	0.038376	0.0383759		9.61775	1.22397	22.6725	16.2855	49.7998
Dongguan City	Guangdong	727.566	15	40965	84601	36025.7			10501		32263.5	46	0.807972	0.718896	-11.0247	256.117	42.9628	778.22	160.509	1237.81	0.112276
ZhongShan City	Guangdong	274.236	14	20331	78717	20177.1	344.85			18	16827	0	1.03038	0.94557	-8.2313	307.785	51.6299	935.214	192.889	1487.52	0.180715
Yunfu City	Guangdong	87.3328	5	4019	9188	2903.34			356		2725.33	9	0.239192	0.238208	-0.411628	24.8085	4.16153	75.3812	15.5475	119.899	0.291279
Foshan City	Guangdong	677.363	33	44566	126503	43138.4	3968.5				30512.8	53	1.14008	1.0432	-8.49784	365.351	61.2863	1110.13	228.965	1765.73	0.207786
Guangzhou City	Guangdong	1064.81	20	41293	193713	34687.5				1190.56	24794.1	1169	0.920173	0.891374	-3.12977	177.799	29.8252	540.248	111.427	859.299	0.274557
Huizhou City	Guangdong	284.532	17	17444	80151	16012.8	1004.71				15641.4	0	0.188495	0.185978	-1.335	188.753	31.6626	573.531	118.291	912.238	0.683324
Jieyang City	Guangdong	278.325	6	2891	1165	1917.74	208.05	1.5			987.98	20	0.250297	0.249901	-0.158114	79.6518	13.3613	242.024	49.9178	384.955	2.43466
Meizhou City	Guangdong	182.56	7	2862	4454	3220.22					1984.01	0	0.160222	0.160015	-0.129632	48.0974	8.06817	146.145	30.1426	232.453	1.79317
Shantou City	Guangdong	369.424	5	13405	60264	1022	12593.8				0	129	0.727582	0.72601	-0.216151	79.1544	13.2779	240.513	49.6061	382.551	1.76983
Shanwei City	Guangdong	159.235	2	1550	8662	76.5	869.045				0	0	0.186295	0.186272	-0.0123911	32.3813	5.43185	98.3915	20.2934	156.498	12.6298
Jiangmen City	Guangdong	277.285	15	12407	24174	12391.9	175.15				10077.6	20	0.215045	0.213486	-0.724775	166.415	27.9156	505.658	104.292	804.281	1.1097
Heyuan City	Guangdong	118.446	8	4444	18453	4427.13					3045.35	6	0.110466	0.110257	-0.189033	69.9801	11.7389	212.636	43.8565	338.212	1.78917
Shenzhen City	Guangdong	1037.2	24	59833	277040	44997.3	14001.6		828.5	91.5	20295	1074	1.01444	0.90994	-10.3011	559.059	93.7802	1698.72	350.362	2701.92	0.262293
Qingyuan City	Guangdong	176.079	11	6179	12659	4741.69					4242.64	8	0.07556	0.0754389	-0.160894	62.8427	10.5417	190.949	39.3836	303.717	1.8877
Zhanjiang City	Guangdong	256.899	3	7502	30805	1489.95	6294.49				1168.25	0	0.288049	0.287699	-0.121469	57.1639	9.58905	173.694	35.8246	276.272	2.27442
Chaozhou City	Guangdong	167.674	3	4298	14956	3958.1			328.5		3958.1	10	0.246938	0.244157	-1.12618	20.4304	3.42713	62.0784	12.8037	98.7397	0.0876766
Zhuhai City	Guangdong	136.874	7	13253	77401	2392.91	11861.2				1000.35	131	0.256851	0.254778	-0.807253	128.387	21.5365	390.108	80.4602	620.491	0.768645
Zhaoqing City	Guangdong	166.262	16	10576	33883	8709.74			56	242.68	8418.93	114	0.137689	0.136808	-0.639605	107.587	18.0473	326.905	67.4245	519.963	0.812944
Maoming City	Guangdong	204.274	5	4409	15679	3824.55	278.315				1798.22	0	0.212938	0.212664	-0.128803	73.8839	12.3938	224.498	46.303	357.079	2.77228
Yangjiang City	Guangdong	113.528	4	3100	3873	3411.01	136.875				3177.41	0	0.105299	0.105044	-0.243092	31.9398	5.3578	97.0501	20.0167	154.364	0.635002
Shaoguan City	Guangdong	148.67	11	5647	1961	5663.32					1712.83	0	0.107886	0.107795	-0.0841925	27.1786	4.55912	82.5831	17.0329	131.354	1.56016
Beihai City	Guangxi	74.82	2	2770	23430	622.325	2810.47				0	0	0.608791	0.608791		26.9248	0.214496	27.0112	9.97483	64.1253
Nanning	Guangxi	350.52	8	442	7	1624.74			61.364		605.785	15	0.129157	0.129048	-0.0844748	36.5397	0.291093	36.6569	13.5368	87.0245	1.03019
Nanning City	Guangxi	350.52	1	218	150						0	0	0.334347	0.334248	-0.0295448	11.7529	0.0936296	11.7906	4.35411	27.9913	0.947415
Liuzhou	Guangxi	206.91	10	1555	12833	1946.63			54.75		672.823	0	0.216547	0.216417	-0.0601448	32.9687	0.262645	33.0745	12.2139	78.5198	1.30551
Liuzhou City	Guangxi	206.91	5	10609	15307	11599.5					6428.1	196	0.123024	0.122456	-0.461145	26.2817	0.209373	26.366	9.73659	62.5937	0.135735
Guilin City	Guangxi	184.02	16	4805	7528	5763.54					3576.27	316	0.145278	0.145013	-0.182667	39.7379	0.316572	39.8654	14.7217	94.6416	0.51811
Wuzhou City	Guangxi	123.87	6	1979	7301	2501.43					1911.34	48	0.116298	0.116099	-0.17115	29.4038	0.234245	29.4981	10.8932	70.0295	0.409169
Hechi City	Guangxi	92.14	11	3273	2464	3178.47					1197.2	98	0.067829	0.0677628	-0.0979901	32.8469	0.261674	32.9522	12.1688	78.2296	0.798343
Yulin City	Guangxi	217.32	7	6006	19933	4817.05					1316.02	2	0.208851	0.208616	-0.11269	45.7479	0.36445	45.8946	16.9482	108.955	0.966853
Baise City	Guangxi	92.23	12	1693	71	2863.32			207.19		2863.32	105	0.137281	0.136947	-0.243687	43.3745	0.345542	43.5136	16.0689	103.303	0.423915
Guigang City	Guangxi	165.65	3	1450	3486						1635.55	0	0.481103	0.480021	-0.225085	16.9018	0.134648	16.956	6.26159	40.254	0.178839
Hezhou City	Guangxi	68.95	5	1282	667						0	0	0.120833	0.120803	-0.0251561	12.909	0.10284	12.9504	4.78241	30.7447	1.22214
Qinzhou City	Guangxi	94.57	3	2121	8230	1899.84					1808.59	10	0.227093	0.226454	-0.281208	19.6235	0.15633	19.6864	7.26992	46.7362	0.166198
Fangchenggang City	Guangxi	41.85	3	383	251						1000.1	56	0.091085	0.0908665	-0.239601	19.0063	0.151413	19.0672	7.04125	45.2662	0.188923
Liupanshui City	Guizhou		6	2181	7398	752	1276.69				752	0	0.205357	0.205013	-0.167576	23.224	0.328476	44.1913	23.9438	91.6876	0.547141
Anshun City	Guizhou		5	548	2436	817.6					689.85	92	0.137083	0.136755	-0.238898	6.75727	0.0955736	12.8579	6.9667	26.6775	0.111669
Bijie City	Guizhou		11	3014	12357	1978.03			156.1		1978.03	36	0.098833	0.0986528	-0.181999	29.0309	0.410608	55.2409	29.9307	114.613	0.629747
Guiyang City	Guizhou		15	18252	52604	13853.1			361.25	84.5	12900.8	2979	0.371025	0.344781	-7.07328	90.2623	1.27666	171.754	93.0599	356.353	0.0503801
Zunyi City	Guizhou		14	3206	14493	4493.08			169.925		1400.34	1060	0.126847	0.126086	-0.600273	38.9673	0.551147	74.1482	40.175	153.842	0.256286
Tongren City	Guizhou		7	788	4025	1733.45					546.03	0	0.069261	0.0692313	-0.0424743	30.3804	0.429695	57.8087	31.322	119.941	2.82383
Southeast Guizhou Miao & Dong A.P	Guizhou		13	1949	5575	2150.41					0	6	0.084848	0.0848257	-0.0268809	25.4525	0.359995	48.4317	26.2413	100.486	3.73827
South Guizhou Buyi & Miao A.P	Guizhou		13	2535	2542	2087.22			156		1366	0	0.07027	0.0702127	-0.0819749	13.246	0.187349	25.2049	13.6565	52.2948	0.637938
Southwest Guizhou Buyi & Miao A.P	Guizhou		5	416	636	614.59			285.955	51.5	0	50	0.081522	0.0814674	-0.0666669	14.9639	0.211646	28.4737	15.4277	59.0769	0.886153
Wanning City	Hainan		7	559	18	307.1	120.45	7.3	119.25		0	52	0	0		5.17305	0.737384	10.7225	1.07577	17.7087
Sanya City	Hainan		5	3156	7827	0	2667.5		250.575	153	0	471	0.03505	0.0330875	-5.59914	15.128	2.1564	31.3568	3.14597	51.7872	0.00924913
Dongfang City	Hainan		2	162	67	0	244.3	10.975			0	11	0	0		3.57889	0.510147	7.41819	0.744254	12.2515
Lingao County	Hainan										0					1.51424	0.215844	3.13866	0.314896	5.18363
Ledong Li Autonomous County	Hainan		2	315	225	146.25					0	0	0	0		1.07583	0.153352	2.22994	0.223726	3.68285
Wuzhishan City	Hainan										0					1.87837	0.26775	3.89343	0.390621	6.43018
Baoting Li & Miao Autonomous County	Hainan										0					0.96142	0.137044	1.9928	0.199934	3.2912
Danzhou City	Hainan		0	0	63	219					0	0	0	0		0.1221	0.0174046	0.253085	0.0253916	0.417982
Anding County	Hainan										0					2.79845	0.398901	5.80054	0.581958	9.57985
Tunchang County	Hainan										0					0.949402	0.135331	1.96789	0.197435	3.25006
Wenchang City	Hainan										0					3.8686	0.551444	8.0187	0.804502	13.2432
Chartgjiang Li Autonomous County	Hainan		2	324	305						664.3	0	0	0		2.4384	0.347578	5.05424	0.507082	8.3473
Haikou City	Hainan		4	10499	28059	123.7	8047.93				0	37	0.039899	0.0398116	-0.219148	17.0046	2.42389	35.2465	3.53622	58.2112	0.265627
Chengmai County	Hainan										0					1.34599	0.191862	2.78992	0.279907	4.60768
Qiongzhong Li & Miao Autonomous County	Hainan		1	118	92	75.74					0	0	0	0		0.905898	0.12913	1.87771	0.188388	3.10113
Qionghai City	Hainan		1	227	19						799.39	0	0	0		3.56945	0.508802	7.39863	0.742292	12.2192
Baisha Li Autonomous County	Hainan		1	104	81						0	0	0	0		1.32829	0.189339	2.75324	0.276227	4.54709
Lingshui Li Autonomous County	Hainan		2	175	92	109.7					0	0	0	0		1.47434	0.210157	3.05596	0.306599	5.04705
Baoding City	Hebei		32	25433	168736	17407.6	134	1426.42	4391.7	364.613	6055.71	489	0.091352	0.0859367	-5.92793	230.563	15.1847	171.725	320.69	738.163	0.124523
Tangshan City	Hebei		12	21714	222852	19807	2099.5		1405.36	990	10699	6456	0.58992	0.516585	-12.4313	192.064	12.6491	143.05	267.141	614.903	0.049464
Langfang City	Hebei		13	6889	42750	6853.53			1955	46	3038.45	0	0.416066	0.391678	-5.86139	77.1731	5.08255	57.4789	107.34	247.074	0.0421529
Zhangjiakou City	Hebei		14	8518	86502	7713.12		139.475	1875.16		4114.69	404	0.089424	0.0849928	-4.95509	113.927	7.50311	84.8532	158.461	364.744	0.0736098
Chengde City	Hebei		8	6183	47507	5626.1				476.14	1048.1	630	0.070819	0.0670701	-5.29364	78.7726	5.18789	58.6702	109.565	252.195	0.0476412
Cangzhou City	Hebei		13	8502	29768	5418.56	319.1		2722.21		1871.4	682	0.072202	0.0644176	-10.7812	128.565	8.46719	95.756	178.821	411.61	0.0381786
Shyiazhuang City	Hebei		22	25644	217346	28124.1	282		1091.5	386.887	3692.45	1088	0.28304	0.268828	-5.02119	205.439	13.53	153.012	285.745	657.726	0.13099
Qinhuangdao City	Hebei		14	12696	57447	5375.6	5273.01		145.5		1480.79	720	0.111645	0.105563	-5.44702	70.7019	4.65636	52.6591	98.3391	226.356	0.041556
Hengshui City	Hebei		13	8024	45742	2878.92		359	3802.27	471.5	1406.52	1343	0.307757	0.267585	-13.0532	66.2407	4.36255	49.3364	92.1341	212.074	0.0162469
Xingtai City	Hebei		28	9922	29190	5808.81		577.215	2232.4	164	854.485	1973	0.11528	0.0939802	-18.4766	96.9525	6.3852	72.2107	134.851	310.399	0.0167996
Handan City	Hebei		21	15339	100536	11935.6			3187.6	576.475	3616.83	757	0.219855	0.20324	-7.55753	105.37	6.9396	78.4804	146.56	337.35	0.0446376
Sanmenxia City	Henan	99	6	4963	10960	4423.99					1247	0	0.21758	0.216249	-0.612034	10.4343	12.0039	82.5513	27.1267	132.116	0.215864
Xinyang City	Henan	210	10	9208	50880	8479.65					1701.5	1825	0.171312	0.169209	-1.22722	45.3835	52.2103	359.052	117.986	574.632	0.468237
Nanyang City	Henan	339	12	8283	49844	7185.45			741.05		657	0	0.150699	0.150633	-0.0434676	20.784	23.9105	164.433	54.0334	263.161	6.05425
Zhoukou City	Henan	266	7	6386	34140	5705.27		351.82	586	518.7	2059.5	0	0.709573	0.704399	-0.729183	34.698	39.9175	274.514	90.2065	439.336	0.602504
Shangqiu City	Henan	219	13	9242	50295	9627.85					3479.47	311	0.790784	0.774413	-2.07022	41.6703	47.9385	329.675	108.333	527.616	0.25486
Anyang City	Henan	200	8	10348	78682	6782.02		171.675	1698.5		0	3397	1.04792	1.02088	-2.58033	22.9983	26.4578	181.951	59.7901	291.198	0.112853
Pingdingshan City	Henan	203	6	11986	66263	11667.8			281		5116.5	365	0.270399	0.265772	-1.71096	36.9306	42.4859	292.177	96.0107	467.604	0.273299
Kaifeng City	Henan	168	6	5888	20559	6375.95					531	300	1.17141	1.16388	-0.642737	52.14	59.9831	412.506	135.551	660.18	1.02714
Xinxiang City	Henan	235	9	14358	68475	12156.4			1832.28		3444.48	727	1.16795	1.13643	-2.6988	57.2261	65.8343	452.745	148.774	724.579	0.268482
Luoyang City	Henan	291	13	14856	109311	15843.8			262		8290.32	955	0.312419	0.304897	-2.40767	40.2061	46.2541	318.091	104.526	509.078	0.21144
Luohe City	Henan	100	4	7814	43043	6820.77					4082.38	0	0.617496	0.58168	-5.80028	30.4435	35.023	240.854	79.1458	385.467	0.0664565
Puyang City	Henan	113	7	5326	15549	4777.21					2844.29	0	1.73178	1.67936	-3.02699	30.2349	34.783	239.204	78.6035	382.825	0.126471
Jiaozuo City	Henan	167	10	12738	77277	16600.4			329.895		4882.43	3546	1.74384	1.59373	-8.60799	84.712	97.4548	670.2	220.231	1072.6	0.124605
Xuchang City	Henan	169	7	10379	88366	9615.02			113.15	1148.84	6753.38	782	0.71987	0.669088	-7.0543	37.0054	42.572	292.769	96.2052	468.551	0.0664207
Zhengzhou City	Henan	551	8	8259	45127	13537.9					7317.14	2663	1.54205	1.42712	-7.45305	23.8253	27.4092	188.494	61.94	301.669	0.0404759
Zhumadian City	Henan	215	10	8849	31308	7908.27					3499.5	0	0.27542	0.273131	-0.831078	34.0807	39.2073	269.63	88.6016	431.52	0.519229
Hebi City	Henan	75	4	4364	24822	2976.78			1250.5		1287.62	31	1.22267	1.1807	-3.43284	15.4503	17.7745	122.236	40.1672	195.628	0.0569871
Qitaihe City	Heilongjiang		1	180	152	90					0	0	0.053462	0.0534617		10.6901	2.03751	103.565	13.0706	129.363
Yichun City	Heilongjiang		2	1048	1526						0	0	0.005174	0.00517266	-0.030903	8.77119	1.67178	84.9749	10.7244	106.142	3.43607
Jiamusi City	Heilongjiang		4	2509	16037	2694.85		14.6			1622.85	0	0.013103	0.0130677	-0.27171	32.6218	6.21768	316.039	39.8863	394.764	1.45289
Shuangyashan City	Heilongjiang		0	0	0						0	0	0.007258	0.00725848		6.84609	1.30486	66.3246	8.37064	82.8462
Harbin City	Heilongjiang		6	7324	89759	12932.4	152.5			21.9	1742.85	25	0.02415	0.0241067	-0.177982	130.819	24.9339	1267.37	159.951	1583.07	8.89448
Daxing'anling Prefecture	Heilongjiang		1	708	3981						0	0	0	0		5.50359	1.04898	53.3186	6.72919	66.6004
Daqing City	Heilongjiang		8	6977	57281	1631.55			3374.38		1631.55	639	0.214295	0.206923	-3.43996	125.305	23.8831	1213.95	153.21	1516.35	0.440805
Mudanjiang City	Heilongjiang		3	4630	54272	5473.9					838.95	0	0.03949	0.0394598	-0.0759437	53.8057	10.2553	521.268	65.7877	651.116	8.57382
Suihua City	Heilongjiang		2	1317	13011						1095	0	0.00269	0.0026843	-0.214381	37.2014	7.09054	360.405	45.4857	450.183	2.09981
Jixi City	Heilongjiang		2	1072	15254						0	0	0.018118	0.0181181		18.7664	3.57685	181.808	22.9455	227.097
Hegang City	Heilongjiang		1	1525	3300						0	0	0.011438	0.0114385
Heihe City	Heilongjiang		3	1362	12866	1224.47					573.045	65	0.000728	0.00065583	-9.92054	36.9335	7.03948	357.81	45.1582	446.941	0.0450525
Qiqihar City	Heilongjiang		4	3709	14882	3397.87					0	0	0.023137	0.0231177	-0.0853853	44.2853	8.44073	429.034	54.1472	535.908	6.27632
Shiyan City	Hubei		9	8953	15069	6463.8					1533.16	108	0.100136	0.099899	-0.236989	61.3442	6.32982	133.094	56.9681	257.736	1.08755
Xianning City	Hubei		3	3854	7686	4184.6					3309.6	0	0.11508	0.114799	-0.244177	24.847	2.56385	53.9087	23.0745	104.394	0.427534
Xiaogan City	Hubei		6	3847	8316	4507.33					2139.83	310	0.600838	0.597334	-0.583251	37.3079	3.84963	80.9442	34.6465	156.748	0.268749
Yichang City	Hubei		20	10775	26780	10768.8			386.9		2402.25	2	0.117088	0.116874	-0.18349	44.6821	4.61054	96.9435	41.4946	187.731	1.02311
Enshi Tujia & Miao A.P	Hubei		5	2635	3195	2913.3			16.5		793.5	0	0.022343	0.0223341	-0.0380305	31.1318	3.21234	67.5443	28.9109	130.799	3.43935
Wuhan City	Hubei		15	42781	183689	41417.5				132.89	14297.5	99	0.512268	0.502758	-1.85661	155.257	16.0203	336.851	144.182	652.31	0.351345
Administrative units directly under the Jurisdiction	Hubei		5	6123	16216	3421.94			1843		1411.48	0	0.355812	0.355089	-0.203408	32.0732	3.30948	69.5868	29.7852	134.755	0.662483
Jingzhou City	Hubei		9	8205	34254	7111.19			237.6		2825.95	0	0.300193	0.299482	-0.236734	27.6857	2.85676	60.0676	25.7107	116.321	0.491357
Jingmen City	Hubei		5	5662	14439	4696.49			214		2902.62	1	0.523472	0.519781	-0.70515	22.7392	2.34635	49.3356	21.1171	95.5382	0.135486
Xiangyang City	Hubei		10	15119	81223	13114.1				87.6	7635.04	289	0.59457	0.586062	-1.43094	30.6119	3.1587	66.4164	28.4281	128.615	0.0898813
Ezhou City	Hubei		3	2787	5552	2582.22					1183	0	0.489395	0.486418	-0.608279	10.4235	1.07555	22.6151	9.6799	43.794	0.0719965
Suizhou City	Hubei		1	1864	5259	1862.5					669.5	5	0.284722	0.284133	-0.207027	7.23076	0.746109	15.6881	6.71494	30.3799	0.146743
Huanggang City	Hubei		8	4416	7308	4051.82					2029.23	74	0.176025	0.175764	-0.148199	26.2638	2.71004	56.9826	24.3902	110.347	0.744586
Huangshi City	Hubei		4	5982	25082	5759.25					3542.05	2	0.276545	0.274879	-0.602245	23.4807	2.42286	50.9443	21.8056	98.6534	0.163809
Loudi City	Hunan	132.34	6	5128	10224	3221.05					2280.72	603	0.208289	0.20702	-0.609497	47.9677	3.73583	78.5073	60.0038	190.215	0.312084
Yueyang City	Hunan	251.96	8	7984	7748	5843.95					2872.5	4	0.228549	0.228035	-0.224925	65.4303	5.09585	107.088	81.8481	259.462	1.15355
Changde City	Hunan	222.13	9	6288	65077	5393.48					2797.72	50	0.241084	0.240612	-0.195927	66.3841	5.17013	108.649	83.0412	263.244	1.34358
Zhangjiajie City	Hunan	53.49	6	1391	2202	1364.15	281				0	0	0.052784	0.0527718	-0.0240317	17.35	1.35125	28.3962	21.7035	68.8009	2.86281
Huaihua City	Hunan	171.13	13	5793	8677	5116.25					1454	13	0.081962	0.0819005	-0.074919	78.2758	6.09628	128.112	97.9167	310.4	4.14311
Zhuzhou City	Hunan	213.99	9	10225	43517	9153.47					7289.52	268	0.179023	0.177846	-0.657041	69.2654	5.39454	113.365	86.6455	274.67	0.418041
Yongzhou City	Hunan	183.79	11	4532	8751	4022.85					857.25	0	0.118333	0.118286	-0.039471	50.6328	3.94339	82.8693	63.3376	200.783	5.08687
Xiangtan City	Hunan	137.91	5	7793	26243	6693.16					6455.97	156	0.383218	0.377918	-1.38297	26.01	2.02572	42.5698	32.5365	103.142	0.0745803
West Hunan Tujia & Miao A.P	Hunan	88.52	8	3088	1210	2362.17					1277.27	488	0.055431	0.0550636	-0.663101	38.0251	2.96148	62.2346	47.5664	150.788	0.227398
Yiyang City	Hunan	171.71	6	5623	7528	4405.22					1893.4	529	0.165177	0.164468	-0.428997	37.7394	2.93922	61.767	47.209	149.655	0.348848
Hengyang City	Hunan	318.1	9	9050	37859	7375.22					4176.47	101	0.283745	0.282654	-0.384372	78.9367	6.14776	129.193	98.7435	313.021	0.814372
Shaoyang City	Hunan	232.23	10	7227	12402	6120.73					2516.31	4	0.164022	0.16377	-0.153654	45.3599	3.53273	74.2393	56.7416	179.874	1.17064
Chenzhou City	Hunan	191.13	7	5022	9484	4693.03		324	19.5		4544.03	252	0.143384	0.142839	-0.379716	44.9101	3.49769	73.503	56.1789	178.09	0.469008
Changsha City	Hunan	476.58	12	32110	161859	30757.7					23756.6	114	0.351852	0.344176	-2.1817	82.1723	6.39975	134.489	102.791	325.852	0.149357
Jilin City	Jilin		7	7925	77548	11402.3				282.875	0	135	0.017443	0.0173504	-0.530867	93.8075	0.596972	335.225	134.308	563.937	1.0623
Siping City	Jilin		5	5114	27150	5334.06					0	0	0.007769	0.00776457	-0.0599673	39.9351	0.254139	142.71	57.1766	240.075	4.00366
Yanbian Korean A.P	Jilin		2	4376	2350	4298.36					0	0	0	0		31.1754	0.198394	111.406	44.6349	187.415
Songyuan City	Jilin		5	2178	5860	2131.74					1284.05	0	0.034067	0.0337591	-0.90309	43.5008	0.27683	155.452	62.2817	261.511	0.289574
Baicheng City	Jilin		4	947	721						0	0	0.019557	0.0195569		19.1973	0.122168	68.6023	27.4855	115.407
Baishan City	Jilin		2	647	0						0	0	0.001716	0.00171606		10.2892	0.0654782	36.7688	14.7314	61.8548
Liaoyuan City	Jilin		1	1898	17424	1811.14					0	0	0.009141	0.00913945	-0.0114873	32.6766	0.207947	116.771	46.7842	196.439	17.0965
Tonghua City	Jilin		4	699	6						0	0	0.003915	0.00391504		33.4819	0.213072	119.649	47.9372	201.281
Changchun City	Jilin		11	6026	70583	6620.43					2541	120	0.070609	0.0699375	-0.950699	26.7159	0.170015	95.4703	38.2502	160.606	0.168935
Nanjing City	Jiangsu	628.6	42	20045	141664	19536.2					16561	933	0.302195	0.286902	-5.06063	86.6065	3.88118	115.49	63.9527	269.931	0.0533393
Nantong City	Jiangsu	407.78	68	26954	240755	23417.8	526.02				2138.5	887	0.055051	0.0524547	-4.71553	186.525	8.35893	248.732	137.736	581.352	0.123284
Suqian City	Jiangsu	227.97	12	5980	33385	4809.05			331.5		0	0	0.014289	0.0142799	-0.0636996	43.4132	1.94552	57.8917	32.0575	135.308	2.12418
Changzhou City	Jiangsu	293.74	34	19550	268934	18283.7				485	14203.5	0	0.16843	0.156002	-7.37829	198.025	8.8743	264.068	146.228	617.195	0.0836501
Xuzhou City	Jiangsu	462.56	23	20184	94391	19651.9		122.39	371.95	115.675	10677.8	1740	0.062778	0.055442	-11.6851	115.635	5.18207	154.2	85.3883	360.405	0.0308431
Yangzhou City	Jiangsu	253.06	11	15211	54895	14511.9					11391.4	133	0.051623	0.0487861	-5.49497	69.4414	3.11195	92.6005	51.2775	216.431	0.0393872
Wuxi City	Jiangsu	452.35	72	49665	565243	49244.5			22.515	130.065	44543.9	1438	0.195432	0.159134	-18.5733	343.065	15.3741	457.479	253.329	1069.25	0.0575691
Taizhou City	Jiangsu	257.18	8	4719	16473	4468.42			565.75		2117.39	17	0.03025	0.0297948	-1.50512	83.8223	3.75641	111.778	61.8969	261.253	0.173577
Huai'an City	Jiangsu	244	12	10801	48941	10043.9					7141.3	5	0.048031	0.0470522	-2.03785	53.7756	2.4099	71.71	39.7094	167.605	0.082246
Yancheng City	Jiangsu	381.36	14	10127	56725	8842.42	373.012			350.5	4699.52	18	0.012734	0.0125858	-1.16483	90.639	4.0619	120.868	66.9305	282.499	0.242523
Suzhou City	Jiangsu	738.51	115	70211	628284	68139.6				66.5	55713.3	1281	0.20353	0.163199	-19.8161	534.007	23.931	712.101	394.326	1664.37	0.0839905
Lianyungang City	Jiangsu	227.55	13	7711	13767	6276.51	1097.58				1064.68	112	0.037539	0.0369616	-1.53829	51.8793	2.32492	69.1814	38.3092	161.695	0.105113
Zhenjiang City	Jiangsu	192.97	17	10973	44609	9865.12					8046.81	247	0.088617	0.0837198	-5.52627	96.8262	4.33917	129.118	71.4992	301.783	0.0546087
Shangrao City	Jiangxi	276.466	6	5423	25891	4954.74					3466.12	0	0.00083	0.0008294	-0.0899841	29.6105	2.75239	53.3571	6.12366	91.8437	1.01977
Jiujiang City	Jiangxi	211.368	9	5528	15570	7039.18			97.5		5978.92	7	0.003999	0.0039846	-0.355156	39.9753	3.71584	72.0343	8.26719	123.993	0.349126
Nanchang City	Jiangxi	342.184	4	11329	66890	9923.12			1496.5		5564.38	0	0.039505	0.0392944	-0.533055	64.0928	5.95764	115.493	13.2549	198.799	0.372942
Jian City	Jiangxi	191.875	4	1884	8988	2590.08					2017.68	0	0.000946	0.00094519	-0.0628052	26.8886	2.49939	48.4525	5.56077	83.4013	1.32815
Yichun City	Jiangxi	208.242	5	4857	9947	5579.93					4973.98	11	0.001384	0.00137673	-0.525216	65.5714	6.09507	118.158	13.5606	203.385	0.387218
Fuzhou City	Jiangxi	152.865	7	3268	19349	2819.27					1189.05	0	0.001135	0.00113502	-0.0360217	24.4099	2.26898	43.9858	5.04814	75.7128	2.10432
Xinyu City	Jiangxi	72.9265	2	2808	13318	3351.82					1587.75	0	0.011425	0.0113806	-0.392048	14.7468	1.37076	26.5732	3.04974	45.7404	0.11667
Jingdezhen City	Jiangxi	92.7039	1	2178	10861	2735.95					2592.8	34	0.007253	0.00719091	-0.858246	9.37529	0.871464	16.894	1.93888	29.0796	0.0338827
Pingxiang City	Jiangxi	113.489	1	1883	8159	2142.36					883.365	0	0.009417	0.00940101	-0.173011	7.15193	0.664796	12.8876	1.47907	22.1834	0.128219
Ganzhou City	Jiangxi	331.548	6	3718	17356	4787.76					3354.62	0	0.001145	0.00114405	-0.0785186	43.7289	4.06474	78.7981	9.04346	135.635	1.72713
Yingtan City	Jiangxi	56.0636	2	1640	500	1659.89					782.5	0	0.002543	0.00254049	-0.110997	8.91157	0.82836	16.0584	1.84298	27.6413	0.24903
Dandong City	Liaoning	147.5	2	724	35						1646.4	18	0.011382	0.0112744	-0.94378	27.0588	2.42046	53.6437	55.4123	138.535	0.146787
Dalian City	Liaoning	497.9	17	25758	191544	2923.32	20901.9				2907.47	2313	0.043734	0.0411219	-5.97241	70.5407	6.30998	139.846	144.456	361.153	0.0604702
Fushun City	Liaoning	153.2	2	8929	51295	8597.98					8369	326	0.054101	0.0515556	-4.70419	24.7327	2.21238	49.0322	50.6487	126.626	0.0269177
Chaoyang City	Liaoning	116.1	2	3464	2257	3045.06			456.25		1187.06	0	0.00719	0.00717039	-0.279258	23.8978	2.1377	47.377	48.939	122.351	0.438135
Benxi City	Liaoning	127.1	5	8504	9421	6928.84					6928.84	0	0.095686	0.0929798	-2.82835	26.8129	2.39846	53.1561	54.9086	137.276	0.0485357
Shenyang City	Liaoning	624.8	13	14853	107150	16763.2			345.3		0	2904	0.126932	0.119765	-5.64626	126.755	11.3385	251.29	259.575	648.96	0.114936
Panjin City	Liaoning	91.8	2	4184	10236	6233.77					3366.43	0	0.037383	0.0367442	-1.70757	48.3853	4.32815	95.923	99.0855	247.722	0.145073
Yingkou City	Liaoning	142.9	3	4292	31403	3878.35	295.65				0	793	0.029867	0.0274873	-7.96671	49.1583	4.39729	97.4554	100.668	251.679	0.0315914
Huludao City	Liaoning	109	5	4754	15639	2958.32	1088				1054.85	594	0.015385	0.0137194	-10.8269	16.9203	1.51355	33.5442	34.6501	86.6281	0.00800119
Liaoyang City	Liaoning	103.9	2	1352	10586	6280.3			445.5	1049.38	1633.3	628	0.061231	0.0584353	-4.56546	11.3741	1.01744	22.549	23.2925	58.2331	0.0127551
Tieling City	Liaoning	114.6	5	4870	30134	5129.24					0	180	0.010587	0.0101117	-4.49326	15.4757	1.38433	30.6804	31.6919	79.2323	0.0176336
Jinzhou City	Liaoning	149.6	8	5424	45588	6213.31	42.6				3211.47	131	0.034589	0.0340365	-1.59652	40.3903	3.61298	80.0731	82.713	206.789	0.129526
Fuxin City	Liaoning	95.5	4	3477	7990	2007.9					0	0	0.030823	0.0308227		8.58394	0.767847	17.0175	17.5786	43.9478
Anshan City	Liaoning	244.9	4	5848	42032	4973.01					3111.7	0	0.061331	0.060957	-0.609336	34.8975	3.12164	69.1837	71.4647	178.668	0.293217
Ulanqab City	Inner Mongolia		2	661	5966	634.78			72	361.5	0	512	0.67723	0.671221	-0.887348	25.2876	5.04847	34.3588	13.2147	77.9096	0.0878005
Wuhai City	Inner Mongolia		4	2030	19096	1078.8			1025.88		0	721	10.5385	10.2612	-2.63139	16.7581	3.34563	22.7696	8.75741	51.6308	0.0196211
Xingan League	Inner Mongolia		1	958	1087	1070.4					547.5	0	0.528142	0.526921	-0.231161	19.698	3.93255	26.7641	10.2937	60.6884	0.262537
Baotou City	Inner Mongolia		7	7414	9909	7005.27			145.5		0	1959	1.17483	1.15008	-2.10657	122.641	24.4843	166.635	64.0894	377.85	0.179368
Hulunbuir City	Inner Mongolia		8	6249	25725	4975.75			237.9		2350.5	401	0.060156	0.0599157	-0.400172	34.9035	6.96822	47.4242	18.2398	107.536	0.268724
Hohhot City	Inner Mongolia		7	7792	41648	6760.85		256.5	110.25	45.75	0	484	0.822049	0.817847	-0.511088	68.0472	13.5851	92.4572	35.5599	209.649	0.410202
Bayannur City	Inner Mongolia		5	2469	4687	0			2492.59		0	800	11.7108	11.6916	-0.164609	49.1818	9.81876	66.8244	25.7013	151.526	0.920522
Chifeng City	Inner Mongolia		11	8741	9355	7205.6			210.5	133	0	0	0.836425	0.836425		62.244	12.4265	84.5722	32.5273	191.77
Tongliao City	Inner Mongolia		10	5287	9920	4245.75			7.5		1928	27	0.863382	0.858672	-0.545564	42.7323	8.53116	58.0613	22.3309	131.656	0.24132
Erdos City	Inner Mongolia		10	3373	5140	1037.85			512.1	875.95	718.845	1958	0.784889	0.772793	-1.54109	85.3702	17.0435	115.994	44.6125	263.021	0.170672
Xilingol League	Inner Mongolia		2	787	1826	0		128.5	297.5		0	88	0.162478	0.162097	-0.234666	12.6209	2.51966	17.1483	6.59539	38.8842	0.1657
Alxa League	Inner Mongolia		4	407	1149	0			269.45		0	178	2.6039	2.59812	-0.221945	22.9523	4.58225	31.1858	11.9943	70.7147	0.318613
Wuzhong City	Ningxia		5	2956	15328	2168.38			509.88	173.5	0	226	17.5463	17.5262	-0.114797	27.155	3.45386	67.6586	19.4484	117.716	1.02543
Guyuan City	Ningxia		1	360	2257	205.79			158.93		0	0	0.267346	0.267346		6.65166	0.846028	16.5731	4.76392	28.8347
Shizuishan City	Ningxia		3	2661	16168	999.52			584	1156.88	540	112	10.3139	9.86006	-4.39983	12.117	1.54116	30.1902	8.67816	52.5265	0.0119383
Yinchuan City	Ningxia		6	8744	48053	10232.3				136.95	1728	1126	14.8025	13.3212	-10.007	34.6725	4.41	86.3887	24.8324	150.304	0.0150198
Haidong City	Qinghai		2	69	404						0	0	0.418947	0.418947		48.7722	13.4114	45.6792	16.3295	124.192
Haibei Zang A.P	Qinghai		1	22	172						0	0	0.043955	0.0439549		5.17999	1.42439	4.85149	1.73432	13.1902
Hainan Zang A.P	Qinghai		1	60	450						0	0	0.097694	0.0976516	-0.0435963	9.67479	2.66037	9.06125	3.23923	24.6356	0.565079
Haixi Mongolian & Zang A.P	Qinghai		1	1057	5635	0			1184.5		0	0	0.089072	0.0890715		50.4788	13.8807	47.2777	16.9009	128.538
Xining City	Qinghai		6	4372	33853	5174.66					693	0	0.568005	0.564917	-0.543559	181.15	49.8127	169.662	60.6512	461.277	0.848622
Dongying City	Shandong	80.875	9	7698	11376	8090.9	46		146		2452.5	0	1.44599	1.39326	-3.6467	81.2468	2.08419	132.797	46.0674	262.195	0.0718992
Linyi City	Shandong	330.178	20	22078	104536	20370.5					13538.8	730	0.454276	0.436369	-3.94176	139.774	3.58556	228.459	79.2527	451.071	0.114434
Weihai City	Shandong	129.96	8	9197	60136	3231.47	6186.94				1915.87	982	0.147775	0.141142	-4.48893	60.9529	1.5636	99.6265	34.5606	196.704	0.0438198
Dezhou City	Shandong	168.311	12	9152	32425	7920.51	231		333.975	146	4992.47	94	0.820924	0.805216	-1.9135	92.3674	2.36946	150.973	52.3729	298.083	0.155779
Rizhao City	Shandong	101.574	9	6275	13393	4425.4	2120.25				3628.45	91	0.432677	0.419434	-3.06052	75.6425	1.94042	123.637	42.8897	244.109	0.0797606
Zaozhuang City	Shandong	135.971	8	9338	53635	9577.98					7123.12	81	0.634361	0.587389	-7.4046	66.6151	1.70885	108.881	37.7712	214.977	0.0290329
Taian City	Shandong	189.867	7	9790	34359	9680			693.5		7286.85	789	1.16379	1.0808	-7.13137	76.8133	1.97045	125.55	43.5536	247.887	0.0347601
Jinan City	Shandong	430.997	17	21871	107271	20964.1			132.5		18116.8	1374	0.828671	0.753611	-9.05788	153.679	3.94227	251.187	87.1371	495.946	0.054753
Jining City	Shandong	266.136	15	18406	136503	15808.2			146		9720.88	1789	1.25445	1.19019	-5.12221	136.243	3.49497	222.687	77.2504	439.675	0.0858369
Zibo City	Shandong	182.242	14	23299	125527	21774.8			1026		11402.9	1560	1.03564	0.90709	-12.4124	119.157	3.05668	194.761	67.5628	384.537	0.0309801
Binzhou City	Shandong	120.474	12	10681	10852	10175.4	261		823.86		3928.32	0	0.995446	0.970638	-2.49214	86.6391	2.22251	141.61	49.1248	279.597	0.112191
Weifang City	Shandong	451.387	23	32308	122800	30233.3			3425.3		10412.4	0	1.06358	0.996915	-6.2683	147.171	3.77529	240.548	83.4465	474.94	0.0757686
Yantai City	Shandong	323.356	19	22985	80314	4565.36	17071.6		132.25		3688.46	556	0.1625	0.159252	-1.99894	112.388	2.88303	183.696	63.7245	362.691	0.181442
Liaocheng City	Shandong	185.404	11	13010	14869	12041.4			788.1		7394.1	685	0.758739	0.735474	-3.06619	85.9921	2.20591	140.553	48.758	277.509	0.0905062
Laiwu City	Shandong	58.2206	3	2749	13549	2852.25					2620.47	822	0.779621	0.7157	-8.199	14.5468	0.373162	23.7765	8.24812	46.9446	0.00572565
Heze City	Shandong	203.793	9	9758	26040	9850.48					7682.38	0	0.717877	0.699124	-2.61232	59.345	1.52235	96.9985	33.649	191.515	0.0733121
Qingdao City	Shandong	479.894	30	38270	309187	14830	21013.2		1044	568.07	10005.2	1025	0.734724	0.67664	-7.90562	342.073	8.77504	559.113	193.957	1103.92	0.139637
Linfen City	Shanxi	176.195	6	3921	38634	3025.11			307	597.225	674.155	314	0.028466	0.0240973	-15.346	62.9274	12.0483	242.509	46.6982	364.183	0.0237315
Luliang City	Shanxi	141.439	5	1423	31882	1645.82			192.92		0	114	0.011929	0.0107789	-9.63857	72.5049	13.882	279.419	53.8056	419.611	0.0435346
Datong City	Shanxi	182.366	12	5936	29607	5137.46				473	1841.88	1045	0.120659	0.102197	-15.3007	56.1214	10.7451	216.28	41.6474	324.794	0.0212274
Taiyuan City	Shanxi	347.053	12	14480	64639	13218.1			1884.17		4380.34	2691	0.837966	0.678049	-19.084	92.5344	17.7169	356.608	68.6694	535.529	0.0280617
Xinzhou City	Shanxi	116.221	14	3342	19073	971.46			2712.89		0	620	0.013683	0.00955827	-30.144	49.9742	9.56818	192.59	37.0856	289.218	0.00959455
Jinzhong City	Shanxi	143.493	12	4125	20715	986.94			2767.64	41	0	380	0.028397	0.0242378	-14.6465	33.2661	6.36921	128.201	24.6866	192.522	0.0131446
Jincheng City	Shanxi	116.395	12	4477	22656	4326.18			8	218.825	518.275	711	0.018007	0.0101614	-43.5685	46.5003	8.90307	179.202	34.5077	269.113	0.00617679
Shuozhou City	Shanxi	79.4354	7	2817	31748	752.275	310	144.4	309.95	958.415	0	231	0.049137	0.0443744	-9.69292	18.2209	3.48861	70.2194	13.5216	105.45	0.0108791
Yuncheng City	Shanxi	193.05	11	6148	33505	3406.28			2198.75	105.315	522.2	1053	0.013495	0.00534882	-60.3655	67.538	12.931	260.277	50.1196	390.866	0.00647499
Changzhi City	Shanxi	139.623	12	5835	29217	5802.77			65.16		4915.69	1839	0.091674	0.0671377	-26.7649	50.1892	9.60936	193.419	37.2452	290.462	0.0108524
Yangquan City	Shanxi	82.1644	4	4073	23468	3304.74			463.5		514.42	772	0.201146	0.173715	-13.6378	30.1178	5.76643	116.068	22.3503	174.302	0.0127808
Xianyang City	Shaanxi		13	9498	62905	7458.38			65.55		3258.55	500	1.74962	1.65943	-5.15474	37.3589	80.6721	96.4044	104.38	318.815	0.0618489
Shangluo City	Shaanxi		1	565	8421	443.498					0	0	0.03976	0.0397404	-0.049967	2.82669	6.10389	7.29424	7.89769	24.1225	0.482764
Ankang City	Shaanxi		1	704	69075	814.65					814.65	0	0.045119	0.0450929	-0.0583099	4.96812	10.7281	12.8202	13.8808	42.3971	0.727106
Baoji City	Shaanxi		8	6316	26272	6102.49					4000.22	6	0.165572	0.163833	-1.04979	18.7447	40.4768	48.3704	52.3721	159.964	0.152377
Yan'an City	Shaanxi		5	1803	18327	927.01			557.5		0	4	0.237255	0.237209	-0.0194694	33.1123	71.5021	85.4461	92.515	282.576	14.5137
Yulin City	Shaanxi		3	1321	7788	1616.62				398.65	0	0	0.386808	0.386449	-0.0929822	42.3318	91.4104	109.237	118.274	361.253	3.88518
Hanzhong City	Shaanxi		0	0	15200	2747.11					960	4	0.087976	0.087927	-0.0554301	2.74103	5.91893	7.0732	7.65837	23.3915	0.422006
Weinan City	Shaanxi		8	2734	28805	2801.77			87.12		1818.67	0	1.09909	1.08418	-1.35703	28.6266	61.8158	73.8708	79.9821	244.295	0.180023
Xi'an City	Shaanxi		20	23115	140642	21636.9			140		14166.7	407	0.554963	0.526957	-5.04632	50.9713	110.066	131.531	142.412	434.981	0.0861977
Tongchuan City	Shaanxi		3	763	5338	824.03					0	0	0.163317	0.163317		15.7809	34.077	40.7225	44.0915	134.672
Shanghai	Shanghai	2056	50	72466	616634	42186.2	12846.7		121	1246.47	28830.3	1255	3.43081	3.17846	-7.35546	462.734	53.8343	1226.06	1210.03	2952.66	0.401424
Leshan City	Sichuan	127.757	6	3512	4900	2641.55					2560.3	0	0.148377	0.147993	-0.258287	12.9976	1.61188	33.2079	18.9801	66.7974	0.258617
Neijiang City	Sichuan	145.75	2	2185	10660	2808.21					1649.52	101	0.301567	0.298981	-0.857398	16.6784	2.06835	42.612	24.3552	85.7139	0.0999698
Liangshan Yi A.P	Sichuan	124.748	2	1483	7858	1554.51			151.5		1554.51	15	0.041561	0.0415408	-0.0485503	8.25837	1.02415	21.0996	12.0596	42.4416	0.87416
Nanchong City	Sichuan	225.479	7	4110	15906	5088.28					1180.53	41	0.17013	0.169738	-0.230325	21.0166	2.60635	53.6959	30.6902	108.009	0.468943
Yibin City	Sichuan	169.936	8	1526	9143	2933.04					0	54	0.141414	0.14134	-0.0521235	16.2076	2.00996	41.4092	23.6677	83.2944	1.59802
Bazhong City	Sichuan	96.254	8	1688	20049	1612.92					0	5	0.041676	0.0416702	-0.0127869	7.58721	0.940919	19.3848	11.0795	38.9924	3.04921
Guangyuan City	Sichuan	81.9223	3	2139	3372	1888					1643.5	14	0.05003	0.0499339	-0.192133	7.70076	0.955001	19.6749	11.2453	39.576	0.205983
Guangan City	Sichuan	93.1693	5	2841	13127	2302.29					1599.94	3	0.241481	0.240048	-0.593654	14.7796	1.83288	37.7609	21.5825	75.9559	0.127946
Deyang City	Sichuan	149.413	4	5769	15706	5702.73					3779.88	0	0.587784	0.581761	-1.02469	20.0703	2.48899	51.2782	29.3083	103.146	0.10066
Chengdu City	Sichuan	920.284	87	28582	215612	32042.8	4	948.5	327		25638.7	3736	0.493244	0.477023	-3.28862	214.023	26.5418	546.814	312.534	1099.91	0.334461
Panzhihua City	Sichuan	72.9614	6	1727	2135	2126.16					1844.71	0	0.100896	0.100582	-0.310795	13.9666	1.73205	35.6836	20.3952	71.7774	0.230947
Luzhou City	Sichuan	163.658	0	0	0	1555.85					977.45	0	0.094825	0.0946913	-0.141091	33.3302	4.13341	85.1563	48.6716	171.291	1.21405
Ganzi Zang A.P	Sichuan	22.4188	0	0	113						0	0	0.004301	0.00430141		1.66889	0.206966	4.26391	2.43706	8.57683
Meishan City	Sichuan	100.624	3	2383	8907	1945.61					801.335	0	0.206164	0.205938	-0.109652	10.2241	1.26793	26.1218	14.93	52.5438	0.479189
Mianyang City	Sichuan	183.868	5	7072	29033	6995.39					6948.39	3	0.151619	0.150693	-0.611218	19.5132	2.41991	49.8548	28.4948	100.283	0.16407
Zigong City	Sichuan	109.893	4	3401	16302	3376.26					2146.21	5	0.393839	0.389217	-1.17366	9.30998	1.15457	23.7864	13.5952	47.8461	0.0407665
Ziyang City	Sichuan	119.955	4	2972	14684	2816.43					2254.28	0	0.339544	0.336658	-0.849854	14.3843	1.78385	36.7509	21.0052	73.9242	0.0869846
Dazhou City	Sichuan	178.858	1	1283	1715	1807.66					1807.66	0	0.095693	0.0954991	-0.202855	17.4922	2.16927	44.6913	25.5435	89.8963	0.443154
Suining City	Sichuan	124.812	5	4684	10412	4884.74					4822.74	12	0.372574	0.361579	-2.95093	5.66196	0.702162	14.4659	8.26808	29.0981	0.00986066
Aba Zang & Qiang A.P	Sichuan	27.0599	0	0	0	226.569			29.5		0	0	0.003517	0.00351657		9.95972	1.23514	25.4464	14.544	51.1853	12.2789
Yaan City	Sichuan	52.1723	1	27	2031	764.843					642	0	0.041469	0.0414531	-0.0380719	9.12677	1.13185	23.3183	13.3277	46.9045	1.23197
Tianjin	Tianjin	1034	37	17666	130982	14098.1	3481.34	86.92	3859.32	459.275	6144.25	395	2.44409	2.28705	-6.42509	164.178	24.7605	316.188	214.162	719.288	0.11195
Urumqi City	Xinjiang		5	12743	37737	1149.2			988.325	68	0	591	1.16415	1.15797	-0.531475	52.8434	5.81281	25.4599	19.6459	103.762	0.195234
Ili	Xinjiang		3	1739	2454	1628.03					0	0	0.23086	0.23086		9.64559	1.06102	4.64724	3.58601	18.9399
Karamay City	Xinjiang		1	414	5067	0		4056	519.75		0	0	6.03683	6.03683		13.102	1.44123	6.31256	4.87103	25.7269
Bortala Mongolian A.P	Xinjiang		2	390	528	0				358.475	0	10	0.477939	0.477907	-0.00673852	1.73545	0.190901	0.83614	0.6452	3.40769	0.505701
Turpan Prefecture	Xinjiang		1	6	175	0			307.07		0	0	1.59422	1.59422		7.88679	0.867554	3.79986	2.93213	15.4863
Hotan Prefecture	Xinjiang		1	809	800	0		20	268.5		0	0	0.303864	0.303864		10.2193	1.12413	4.92364	3.79928	20.0663
Hami Prefecture	Xinjiang		1	1041	562	0			534.5		0	0	0.62133	0.62133		7.8301	0.861317	3.77254	2.91105	15.375
Kashi Prefecture	Xinjiang		1	402	500	1222.62			193.76		0	0	1.25778	1.25778		8.27369	0.910112	3.98626	3.07596	16.246
Tacheng Prefecture	Xinjiang		4	780	1147	359.74		475.95	296.5		0	0	0.200888	0.200888		5.99403	0.659348	2.88792	2.22844	11.7697
Bayingolin Mongolian A.P	Xinjiang		2	138	635	144.275			6.5		0	0	0.340541	0.340541		10.9927	1.20921	5.2963	4.08685	21.5851
Changji Hui A.P	Xinjiang		6	1748	3659	627.6		125.87	238.805	584.5	0	0	0.941098	0.941098		16.0169	1.76187	7.71694	5.95471	31.4504
Aksu Prefecture	Xinjiang		5	2988	4197	578.5		62.6	729.425		0	0	1.20423	1.20423		8.71005	0.958112	4.1965	3.23819	17.1029
Altay Prefecture	Xinjiang		1	450	179	225		146			0	0	0.262748	0.262748		1.65985	0.182585	0.799716	0.617094	3.25925
Lincang City	Yunnan	70.7	1	184	50			493			0	0	0.07791	0.0779098		6.23292	0.648322	92.3689	9.09935	108.349
Lijiang City	Yunnan	34	3	1219	1366	1036.56					967.5	703	0.086284	0.0851759	-1.28393	21.4277	2.22882	317.548	31.282	372.487	0.290114
Baoshan City	Yunnan	55.9	1	783	799	748.575					0	0	0.06322	0.0632047	-0.0241506	5.51837	0.573997	81.7796	8.05618	95.9281	3.97211
Dali Bai A.P	Yunnan	110.2	4	2201	3674	2266.59		22.395		32	996.88	3	0.138757	0.138607	-0.108142	19.784	2.05784	293.188	28.8823	343.912	3.18018
Dehong Dai & Jingpo A.P	Yunnan	40.8	2	840	563	494.685			72		0	0	0.048981	0.0489782	-0.00622484	12.8341	1.33494	190.195	18.7362	223.1	35.846
Wenshan Zhuang & Miao A.P	Yunnan	97	2	814	3217	876.775					0	122	0.053141	0.053042	-0.185444	0.948761	0.098686	14.0602	1.38508	16.4927	0.0889362
Kunming City	Yunnan	409.5	15	27249	192429	25864.3			174	104.5	25809.8	11655	0.448567	0.401328	-10.531	186.338	19.3821	2761.44	272.032	3239.2	0.307586
Zhaotong City	Yunnan	106.7	1	1795	4254	1527.53		60.315	39.215		1527.53	0	0.071767	0.0716662	-0.141132	15.0396	1.56436	222.88	21.9561	261.44	1.85245
Puer City	Yunnan	77	1	603	1545	535.5					0	0	0.043351	0.0433456	-0.0114047
Qujing City	Yunnan	207.8	3	3385	5599	3250.7					2012.7	70	0.138791	0.138414	-0.271742	23.049	2.39746	341.575	33.6489	400.671	1.47445
Chuxiong Yi A.P	Yunnan	84.6	2	1558	11370	1781.7					0	0	0.227409	0.227409		12.2808	1.27739	181.995	17.9285	213.482
Yuxi City	Yunnan	87.1	7	3038	10675	1875.06			753		1691.85	51	0.262155	0.260401	-0.668952	18.6016	1.93486	275.667	27.1562	323.36	0.483382
Honghe Hani & Yi A.P	Yunnan	158.8	4	2582	3582	2697.46		2.5			1499.4	65	0.10641	0.106259	-0.142321	21.1562	2.20057	313.524	30.8855	367.766	2.58407
Xishuangbanna Dai A.P	Yunnan	40.6	1	766	3186	476.325		10.3	374.5		0	0	0.094722	0.0947216		8.51917	0.886127	126.25	12.437	148.092
Diqing Zang A.P	Yunnan	9.8	1	226	226						0	0	0.010698	0.010698		3.75569	0.39065	55.6574	5.48287	65.2867
Lishui City	Zhejiang	102.511	9	3443	14222	3875.77				16.85	2551.45	0	0.028146	0.0281223	-0.083824	41.2842	1.53951	93.9317	35.28	172.035	2.05236
Taizhou City	Zhejiang	331.557	9	13362	85847	7487.68	3891.26			2115.65	3269.58	732	0.13988	0.13903	-0.607561	101.967	3.80241	232.001	87.1375	424.908	0.699365
Jiaxing City	Zhejiang	240.117	13	12647	179573	5302.69	6445.98		1779	210	3641.84	228	0.661451	0.652779	-1.31118	85.9709	3.2059	195.605	73.4676	358.249	0.273227
Ningbo City	Zhejiang	519.831	25	30330	222112	18605.8	16716				12604.2	2359	0.22355	0.21824	-2.37552	177.621	6.62356	404.131	151.788	740.163	0.31158
Hangzhou City	Zhejiang	638.076	28	42169	195887	34328.5	9045.59			127.5	21044.8	4701	0.288603	0.283006	-1.93936	286.73	10.6923	652.38	245.029	1194.83	0.616094
Wenzhou City	Zhejiang	602.91	14	19259	120206	16121.3	3831.89		142	38.679	4892.34	6	0.107752	0.107481	-0.251221	130.113	4.85198	296.039	111.19	542.194	2.15824
Huzhou City	Zhejiang	153.093	22	13380	85471	12884.1					8443.28	670	0.379698	0.371476	-2.16523	118.721	4.42716	270.12	101.455	494.722	0.228485
Shaoxing City	Zhejiang	287.902	3	9452	105208	5936.94	3608				4253.52	1	0.296838	0.295182	-0.55773	42.2597	1.57588	96.1512	36.1136	176.1	0.315745
Zhoushan City	Zhejiang	71.2956	9	2522	18575	0	2634.07				0	802	0.181939	0.171288	-5.85401	28.2334	1.05284	64.2378	24.1272	117.651	0.0200975
Quzhou City	Zhejiang	93.6243	8	4677	14013	4194.52	471			3.5	2301.07	15	0.085533	0.0853993	-0.15575	47.0259	1.75362	106.995	40.1866	195.961	1.25817
Jinhua City	Zhejiang	316.594	12	14418	73057	15382.8					8835.8	5	0.12771	0.12697	-0.57967	109.078	4.06755	248.178	93.2136	454.537	0.784131
Chongqing	Chongqing	1529	80	45441	217910	27549.6					34621.7	724	0.186057	0.184525	-0.823345	259.162	5.98678	329.23	383.779	978.158	1.18803

## Sheet:  cities_WWTPs inventory (2015)
city	province	population	number_wwtps	wastewater	sludge_disposal	effluent_river	effluent_sea	effluent_irrigation	effluent_recharge	effluent_others	effluent_I_B	relcaimed_water	wsi	wsi'	deltawsi	CI_construction	CI_relcaimed_water	CI_wastewater	CI_sludge_disposal	CI_total	CIWSA
Bozhou City	Anhui	186.533	9	9550.03	55189.8	9550.03					6182.03	222.24	0.015357	0.0139703	-9.03146	56.7271	0.952558	54.7422	39.9343	152.356	0.0168695
Liuan City	Anhui	202.971	38	9649.17	54176.6						5387.83		0.00449	0.00447027	-0.434121	94.6939	1.59009	91.3805	66.6619	254.326	0.585841
Hefei City	Anhui	548.381	16	32136.9	240610	32136.9					23908.5	899.103	0.089591	0.0836303	-6.653	292.794	4.91657	282.549	206.119	786.377	0.118199
Anqing City	Anhui	210.364	9	10231.2	33744.2	10231.2					10231.2	0	0.007974	0.00790891	-0.821502	43.5148	0.730697	41.9922	30.6332	116.871	0.142265
Xuancheng City	Anhui	131.279	24	7580.52	31024.9						7326.15	7	0.002383	0.00236397	-0.805524	80.591	1.35328	77.7711	56.7338	216.449	0.268706
Suzhou City	Anhui	214.611	14	9983.87	37091				905.15		6560.85	0	0.02092	0.0203245	-2.84684	73.2884	1.23065	70.7241	51.593	196.836	0.069142
Chaohu City	Anhui		9	4882.03	33311.2	4882.03					2400.98	0	0.038058	0.0371758	-2.31839	55.6481	0.934439	53.701	39.1747	149.458	0.0644663
Chizhou City	Anhui	73.4093	7	3687.1	8945.5						2729.91		0.002775	0.00276781	-0.263987	27.3313	0.458945	26.3749	19.2405	73.4056	0.278044
Huaibei City	Anhui	132.384	22	10460.2	32314.8				1587.1		4401.36	5131.66	0.092404	0.00627265		60.5034	1.01597	58.3864	42.5928	162.499
Huainan City	Anhui	208.165	5	7382.34	31136.1						7382.34	0	0.096237	0.0895841	-6.91345	54.2443	0.910867	52.3463	38.1865	145.688	0.0210731
Chuzhou City	Anhui	196.918	19	12875.9	64929.3	11956.9		919			10744	0	0.011231	0.0110152	-1.92185	70.1096	1.17728	67.6564	49.3552	188.298	0.0979778
Wuhu City	Anhui	226.433	8	15389.3	67756.7	15389.3					14241.9	0	0.044415	0.0429355	-3.33033	88.3697	1.4839	85.2776	62.2098	237.341	0.0712664
Bengbu City	Anhui	171.877	8	14835.5	91697.2						6558.39	0	0.082863	0.0803321	-3.05385	46.2539	0.776692	44.6354	32.5615	124.227	0.040679
Tongling City	Anhui	83.9567	3	4840.63	13722.3						4798.63	0	0.070876	0.0673802	-4.93186	29.5757	0.496634	28.5409	20.8205	79.4338	0.0161062
Fuyang City	Anhui	306.657	10	11409.6	52296	11409.6					10501.1	2361.54	0.024042	0.0156988	-34.7032	74.2362	1.24657	71.6387	52.2602	199.382	0.00574533
Maanshan City	Anhui	147.382	8	9112.51	41211.4						7212.4	0	0.066149	0.064063	-3.15348	63.7327	1.0702	61.5027	44.866	171.172	0.0542802
Huangshan City	Anhui	66.3222	8	4636.81	17467.2						4636.81	0	0.002868	0.00285888	-0.30951	39.0376	0.655517	37.6717	27.4814	104.846	0.338754
Beijing	Beijing	1877	147	66327.1	395136	65217.2			356.67		53900.5	18293.1	1.88177	1.41575	-24.7651	650.548	1713.63	638.039	233.964	3236.18	0.130675
Sanming City	Fujian	142.36	32	6685.03	19708						6214.13	0	0.097784	0.0975511	-0.237723	48.0565	0.185566	47.388	26.8142	122.444	0.51507
Nanping City	Fujian	142.5	22	6145.52	20373.4						4972.69	6.086	0.084766	0.0846343	-0.154859	38.4324	0.148403	37.8978	21.4442	97.9228	0.632335
Xiamen City	Fujian	343.11	15	27331.6	147693				244.3		0	281.984	0.512611	0.510519	-0.408081	97.7946	0.377626	96.4343	54.5666	249.173	0.610597
Ningde City	Fujian	153.68	16	9420.88	109306	7849.58					2186.61	0	0.099578	0.0994425	-0.135647	38.9567	0.150428	38.4149	21.7368	99.2588	0.731744
Quanzhou City	Fujian	540.92	72	33226.1	128128		10709.8		7249.15		9013.16	4246.49	0.374485	0.366077	-2.24516	173.785	0.671057	171.368	96.9672	442.791	0.19722
Zhangzhou City	Fujian	273.8	19	11987.7	55099.7	10309.4					9550.8	69.949	0.178192	0.176797	-0.782601	92.0018	0.355257	90.7221	51.3344	234.414	0.299531
Fuzhou City	Fujian	507.38	19	22282.3	100056						16932.4	0	0.315356	0.31055	-1.52416	133.247	0.514521	131.393	74.348	339.503	0.222747
Putian City	Fujian	162.38	6	8396.52	40423.9						8037.43	0	0.298301	0.292161	-2.05804	26.7781	0.103401	26.4056	14.9414	68.2285	0.0331521
Longyan City	Fujian	137.2	12	9882.2	31540.3						3053.1	0	0.115058	0.114882	-0.152498	60.3968	0.233217	59.5567	33.6997	153.887	1.0091
Linxia Hui A.P	Gansu	62.8	8	1695.54	9662.55	1604.36					1604.36		1.19167	1.1407	-4.27711	23.8413	1.20779	13.2584	31.8763	70.1837	0.0164092
Lanzhou City	Gansu	298.96	7	14641.5	180374	14537.5					11939.6	498.408	6.85434	4.12812	-39.7737	139.831	7.08378	77.7614	186.956	411.632	0.0103494
Jiayuguan City	Gansu	22.79	2	4313.17	34065.2				4313.17		0	3586.37	35.3089	29.1888	-17.333	26.1047	1.32246	14.5171	34.9026	76.8469	0.00443356
Tianshui City	Gansu	116.9	12	2959.16	22486.8	2954.6					2504.72		0.564547	0.543797	-3.67548	58.5186	2.96454	32.5429	78.2406	172.267	0.0468691
Dingxi City	Gansu	84.46	6	1056.78	13251.9			407.71			649.07		0.433221	0.430109	-0.718236	37.9842	1.92427	21.1235	50.7857	111.818	0.155684
Pingliang City	Gansu	76.09	6	1377.78	7075.71						869.06		0.464645	0.457623	-1.5112	41.201	2.08723	22.9123	55.0866	121.287	0.080259
Qingyang City	Gansu	74.63	6	1186.45	15170	1186.45					1186.45	0	0.565078	0.549932	-2.68031	38.1565	1.933	21.2192	51.016	112.325	0.0419074
Zhangye City	Gansu	51.46	5	2104.96	9154.79	1878.85			226.11		1878.85	0	0.715431	0.711388	-0.565036	30.5042	1.54533	16.9637	40.7847	89.7979	0.158924
Wuwei City	Gansu	65.25	5	1798.45	22759			238.39	30.16		153.05	0	1.56054	1.55823	-0.148231	37.5907	1.90433	20.9046	50.2595	110.659	0.746532
Gannan Zang A.P	Gansu	21.5	7	425.88	1403.24						108.73	0	0.013252	0.0132499	-0.017084	25.5675	1.29524	14.2184	34.1843	75.2654	4.40623
Baiyin City	Gansu	79.56	9	1377.75	19717.3				228.827		0	0	4.89079	4.89079		31.0729	1.57415	17.28	41.5452	91.4723
Jiuquan City	Gansu	63.43	8	2574.84	22679.6				475.8		1458.54	111.78	1.12354	1.11666	-0.612537	32.8449	1.66392	18.2654	43.9144	96.6887	0.157849
Jinchang City	Gansu	31.98	5	1793.98	15200.5			1254	539.976		0	207.36	9.25374	9.22724	-0.286294	34.2161	1.73338	19.028	45.7477	100.725	0.351824
Longnan City	Gansu	72.96	6	1130.11	4534						825.22	0	0.058597	0.05845	-0.250944	38.3589	1.94325	21.3318	51.2866	112.921	0.449982
Dongguan City	Guangdong	733.129	43	75985.3	222802	75908.5					69764.8	217.031	0.784996	0.606694	-22.7138	426.519	2.21079	670.136	221.495	1320.36	0.0581304
ZhongShan City	Guangdong	282.83	37	31866.2	125735	31866.2					25012.2	11.356	0.980805	0.849213	-13.4167	430.045	2.22907	675.677	223.326	1331.28	0.0992253
Yunfu City	Guangdong	98.9859	10	5346.18	14667.4				103		5243.18	0	0.277806	0.275325	-0.893303	40.948	0.212247	64.3365	21.2647	126.761	0.141902
Foshan City	Guangdong	705.461	72	69346.2	323879	69346.2					28303.8	1309.41	0.864611	0.800368	-7.43034	472.972	2.45157	743.122	245.618	1464.16	0.197052
Guangzhou City	Guangdong	1154.75	30	64527.8	322529	62045.8			2482		59204.6	8957.95	0.744401	0.688445	-7.51694	454.086	2.35368	713.45	235.811	1405.7	0.187004
Huizhou City	Guangdong	324.087	36	33631.4	106159	31651.4					30432.7	22.8	0.165659	0.161725	-2.37488	401.261	2.07987	630.452	208.378	1242.17	0.523045
Jieyang City	Guangdong	308.337	9	8564.4	15442.3	7668.4		423			7153	63.907	0.278079	0.274638	-1.23758	102.423	0.530891	160.924	53.189	317.067	0.256199
Meizhou City	Guangdong	207.447	10	9438.03	10485.4						7254.39	0	0.163636	0.162829	-0.49341	100.766	0.522303	158.321	52.3286	311.938	0.632208
Shantou City	Guangdong	389.868	31	19966.6	91953.9		16292				1147.58	140.203	0.577496	0.573095	-0.762059	131.775	0.683031	207.041	68.4317	407.93	0.535301
Shanwei City	Guangdong	166.279	5	5585	21377.2						435		0.181818	0.181685	-0.0734508	52.5482	0.272375	82.5625	27.2887	162.672	2.21471
Jiangmen City	Guangdong	293.044	36	28668	84137.7	28277.9	390.095				23492.1	281.655	0.233532	0.228786	-2.03245	271.702	1.40832	426.892	141.097	841.101	0.413836
Heyuan City	Guangdong	129.548	13	7190.02	28971.9	7190.02					6288.57	3	0.124453	0.12395	-0.404584	83.9343	0.435059	131.876	43.5878	259.833	0.642222
Shenzhen City	Guangdong	1137.87	40	99723.1	562745	95612.3			9.3		68658.4	7811.1	1.07626	0.754023	-29.9403	548.611	2.84363	861.965	284.899	1698.32	0.0567236
Qingyuan City	Guangdong	188.159	19	12216.2	27112.5	12216.2					8472.14	16.661	0.06447	0.0642725	-0.305823	138.785	0.719371	218.056	72.0725	429.634	1.40484
Zhanjiang City	Guangdong	295.015	10	16927.5	94024		13077.6				3849.91	0	0.339045	0.337455	-0.469015	128.435	0.665723	201.795	66.6976	397.593	0.847721
Chaozhou City	Guangdong	168.464	5	5243.92	16546.5	5138.56		105.364			5127.12	7.3	0.26988	0.265753	-1.52885	41.9433	0.217406	65.9003	21.7815	129.843	0.0849282
Zhuhai City	Guangdong	143.915	13	21531.1	83406.5		2842.09				11573	1059.51	0.34589	0.313762	-9.28847	211.864	1.09816	332.875	110.023	655.859	0.07061
Zhaoqing City	Guangdong	183.332	26	15196.4	46837.3	14542.2			654.13		9837.91	1643.11	0.125153	0.123408	-1.39375	176.732	0.916062	277.678	91.7787	547.105	0.392542
Maoming City	Guangdong	243.354	13	7499.77	28735						1807.63	0	0.235068	0.234705	-0.154445	123.693	0.641143	194.344	64.235	382.913	2.47929
Yangjiang City	Guangdong	125.334	11	7691.79	28040.3		1216.21				6432.47	0	0.141231	0.140345	-0.627354	53.2963	0.276252	83.7379	27.6772	164.988	0.26299
Shaoguan City	Guangdong	159.151	27	10041.1	11303.7						4254.96	24.026	0.104647	0.104425	-0.21202	97.8447	0.507161	153.731	50.8116	302.895	1.42862
Beihai City	Guangxi	89.96	2	6581	20556						1785	29.2	0.304658	0.303095	-0.512792	63.8291	0.207645	34.3472	14.3503	112.734	0.219844
Nanning	Guangxi	414.32	12	4647.05	8026.87				173		4240.05	4.8	0.125588	0.125064	-0.417702	94.2013	0.306449	50.6909	21.1787	166.377	0.398316
Nanning City	Guangxi	414.32	3	1613	5741	1613					1613	0	0.282973	0.282665	-0.108868	35.6589	0.116003	19.1885	8.01696	62.9803	0.578503
Liuzhou	Guangxi	243.64	11	5321.03	7927						3726.01	103.96	0.208467	0.207826	-0.307536	95.7787	0.311581	51.5397	21.5333	169.163	0.550061
Liuzhou City	Guangxi	243.64	7	18571.7	56877.7						17680.1	0	0.078488	0.078014	-0.603895	82.1023	0.26709	44.1803	18.4586	145.008	0.240122
Guilin City	Guangxi	231.29	20	10120.8	10817.4						7688.92	0	0.080984	0.0808619	-0.151128	147.042	0.478347	79.1251	33.0585	259.704	1.71844
Wuzhou City	Guangxi	149.18	5	3128.2	6016.06						2023.99	2.635	0.106715	0.106556	-0.149318	41.479	0.134937	22.3204	9.32546	73.2597	0.490627
Hechi City	Guangxi	121.97	10	4107.08	13903.6	4107.08					2659.43	71.29	0.045893	0.0458354	-0.125283	71.3638	0.232156	38.4017	16.0443	126.042	1.00606
Yulin City	Guangxi	265.45	7	9593.99	31396.5	9593.99					2771.14	22.2	0.202177	0.201709	-0.231816	54.3736	0.176885	29.2591	12.2245	96.0341	0.414268
Baise City	Guangxi	122.66	12	6890.13	6602.84				234.21		4999.46	110.879	0.106373	0.106041	-0.312239	100.86	0.328112	54.2742	22.6758	178.139	0.57052
Guigang City	Guangxi	199.75	4	5610.28	7644.27						3210.35	1.118	0.288548	0.287603	-0.327578	73.2256	0.238213	39.4036	16.4629	129.33	0.394808
Hezhou City	Guangxi	86.36	6	2731	2406.2						1631	0	0.100915	0.100808	-0.106489	35.6693	0.116037	19.1941	8.01931	62.9987	0.591605
Qinzhou City	Guangxi	118.84	5	4739.3	13705.7	4354.3					3945.3	15	0.166372	0.165632	-0.44446	95.6783	0.311254	51.4857	21.5108	168.986	0.380205
Fangchenggang City	Guangxi	50.63	3	2775	3286						1463	0	0.080935	0.0807894	-0.179627	35.6786	0.116067	19.1991	8.02139	63.0151	0.35081
Liupanshui City	Guizhou		28	4415.69	13940.5						3258.86	1291.1	0.073503	0.0720707	-1.94887	86.1473	1.77005	55.1693	65.1035	208.19	0.106826
Anshun City	Guizhou		5	2740.38	9116.76				140.53		2599.85	500.06	0.116827	0.11568	-0.982588	41.4611	0.851894	26.552	31.3331	100.198	0.101974
Bijie City	Guizhou		20	6551.27	52404.8						2041.96	0	0.083406	0.0832728	-0.159212	108.728	2.23402	69.6303	82.1684	262.761	1.65038
Guiyang City	Guizhou		16	25386.3	112857				345.6		23294.3	0	0.217688	0.207669	-4.60275	233.902	4.80595	149.793	176.765	565.266	0.12281
Zunyi City	Guizhou		29	12578.1	45153.4	12076.6			501.56		8954.88	0	0.143654	0.142792	-0.600602	124.344	2.55487	79.6304	93.9692	300.498	0.500329
Tongren City	Guizhou		10	1746.91	13982.9				120.74		1065.93	0	0.070913	0.0708463	-0.0942786	69.6891	1.43189	44.6294	52.6656	168.416	1.78637
Southeast Guizhou Miao & Dong A.P	Guizhou		25	5687.64	24098.7						5559.41	0	0.049337	0.0492357	-0.205962	149.524	3.07225	95.7563	112.999	361.351	1.75447
South Guizhou Buyi & Miao A.P	Guizhou		13	5052.88	22753.9						2626.56	0	0.05092	0.0508589	-0.120237	41.0519	0.843485	26.2899	31.0238	99.209	0.825108
Southwest Guizhou Buyi & Miao A.P	Guizhou		12	3199.75	15799.2				931.12		2268.63	0	0.061957	0.061825	-0.212511	52.0457	1.06937	33.3304	39.3321	125.778	0.59186
Wanning City	Hainan	25.8	6	957.32	1768.5				103.56		320.6	138.09				12.4964	1.41427	7.98221	1.15388	23.0468
Sanya City	Hainan	53.94	10	5005.3	23099				1233.23		0	875.446	0.094933	0.0871376	-8.21167	62.9528	7.12461	40.2117	5.81287	116.102	0.0141387
Sansha City	Hainan	0.06	1	72.269	0						0	44.751				15.9245	1.80224	10.1719	1.47042	29.3692
Dongfang City	Hainan	18.45	0		69.8						0	3				13.6575	1.54567	8.72385	1.26109	25.1881
Lingao County	Hainan	18.59	1	357.531							357.531					1.05735	0.119665	0.675395	0.0976329	1.95005
Ledong Li Autonomous County	Hainan	16.11	1	301.034	35						301.034	0				3.94393	0.44635	2.51922	0.364171	7.27368
Wuzhishan City	Hainan	5.81	1	331.628	0						331.628	0				8.80467	0.996459	5.62406	0.812996	16.2382
Baoting Li & Miao Autonomous County	Hainan	5.55	1	170.948	102.92						170.948	0				4.2911	0.48564	2.74098	0.396227	7.91394
Danzhou City	Hainan	50.12	3	988.2	1065.2						988.2					8.73023	0.988033	5.57651	0.806122	16.1009
Dingan County	Hainan	12.24	0		212						0					11.4547	1.29637	7.31678	1.05769	21.1255
Tunchang County	Hainan	11.57	1	189.974	360						189.974	0				3.51042	0.397287	2.24231	0.324141	6.47416
Wenchang City	Hainan	27.95	2	893.898	882.5	893.898					851.898	0				6.68228	0.756259	4.26837	0.617021	12.3239
Chartgjiang Li Autonomous County	Hainan	11.9	1	681.32	293.9						681.32	0				9.13651	1.03401	5.83603	0.843637	16.8502
Haikou City	Hainan	171.68	9	8020.78	49131.5						201.88	11	0.022348	0.0223313	-0.0731799	99.0984	11.2153	63.3	9.15044	182.764	2.49759
Chengmai County	Hainan	23.02	2	686.149	1381						0	18.03				17.5873	1.99043	11.2341	1.62396	32.4358
Qiongzhong Li & Miao Autonomous County	Hainan	6.12	1	201.47	150.35						201.47					3.07602	0.348125	1.96484	0.28403	5.67301
Qionghai City	Hainan	23.18	1	914.421	878						914.421					0.352713	0.0399179	0.225299	0.0325684	0.650498
Baisha Li Autonomous County	Hainan	5.81	1	148.551							0					0.492551	0.0557439	0.314621	0.0454806	0.908397
Lingshui Li Autonomous County	Hainan	14.14	1	356.336	37.6						0	0				5.50353	0.622856	3.51543	0.508179	10.15
Baoding City	Hebei	539.15	46	37571.6	275932	24389.1		1782.5	10756.5		9802.2	1589.86	0.075372	0.0653048	-13.3572	559.525	6.49978	272.836	419.268	1258.13	0.0941909
Tangshan City	Hebei	454.89	29	33013.1	315348	26610.8	4281.4		2120.82		19575.2	8130.89	0.520684	0.419937	-19.349	529.344	6.14918	258.119	396.653	1190.27	0.0615156
Langfang City	Hebei	250.98	24	15029	106363	12146.6			1922.6		10483.5	1221.93	0.326104	0.261725	-19.7417	248.531	2.88708	121.189	186.231	558.838	0.0283074
Zhangjiakou City	Hebei	230.81	25	13752.9	89804.5			10.9	585.17		7308.54	446.83	0.099647	0.0924518	-7.22109	249.792	2.90173	121.803	187.176	561.673	0.0777824
Chengde City	Hebei	165.21	13	10920.5	49144						3017.3	1071	0.068935	0.0607895	-11.8163	214.36	2.49014	104.526	160.626	482.003	0.0407913
Cangzhou City	Hebei	361.43	29	17047.3	78741.2	14193.5			1984.68		13884	2083.71	0.056843	0.039982	-29.663	321.581	3.73568	156.81	240.97	723.097	0.0243771
Shyiazhuang City	Hebei	623.9	29	44728.2	373286	41407.1			1861.77		25904.9	10372.1	0.758271	0.564507	-25.5534	594.54	6.90653	289.91	445.506	1336.86	0.0523164
Qinhuangdao City	Hebei	166.17	18	16985.9	106783	9354.88			509.1		4783.83	1976.68	0.415355	0.376451	-9.3664	174.495	2.02704	85.0872	130.754	392.363	0.0418905
Hengshui City	Hebei	206.87	21	12324.5	60445.5	6783.59		1288	3800		3077.49	1281.2	0.105044	0.0784696	-25.298	220.368	2.55992	107.456	165.128	495.511	0.0195869
Xingtai City	Hebei	348.16	33	16908	81210.9	11398.1		980.4	4043.5		3802	1584.72	0.278563	0.240741	-13.5775	250.728	2.91261	122.26	187.878	563.779	0.0415232
Handan City	Hebei	484.67	33	23302.4	122866	17619.3			5683.1		3839.4	8898.54	0.228304	0.0929888	-59.2698	281.791	3.27346	137.407	211.154	633.627	0.0106906
Sanmenxia City	Henan	116	13	7794.36	41477.7						6391.33	54.75	0.259587	0.248804	-4.15389	39.6331	7.17749	125.95	51.5155	224.276	0.0539918
Xinyang City	Henan	274	9	10011.6	53752.2						10011.6	0	0.202506	0.199962	-1.25647	63.4161	11.4846	201.53	82.429	358.859	0.285608
Nanyang City	Henan	414	15	15307.9	58734.4	14530.7			777.2		11762	0	0.596891	0.579151	-2.97206	97.7156	17.6962	310.53	127.012	552.953	0.18605
Zhoukou City	Henan	333	12	12776.5	72419.1						12762.4	0	0.93453	0.875039	-6.36585	66.7493	12.0882	212.122	86.7615	377.721	0.0593355
Shangqiu City	Henan	278	13	13921.3	71940.7						11223.9	726	0.889354	0.827747	-6.92709	97.7737	17.7067	310.714	127.087	553.282	0.0798723
Anyang City	Henan	240	13	9226.76	80899.4						2409.59	1175.96	1.60914	1.55364	-3.44872	73.5699	13.3234	233.797	95.627	416.318	0.120716
Pingdingshan City	Henan	244	10	13633.5	60437.6						7560.37	360	1.14898	1.06371	-7.42099	58.2039	10.5406	184.966	75.6541	329.364	0.0443828
Kaifeng City	Henan	201	11	12437.9	67732.3	11652.9			785		11479.9	295	1.52621	1.35616	-11.1417	67.5124	12.2264	214.547	87.7534	382.039	0.0342891
Xinxiang City	Henan	280	12	17468.3	108335	16483.1			985.25		12907.2	1096.4	1.50866	1.34771	-10.6685	113.587	20.5704	360.966	147.641	642.764	0.060249
Luoyang City	Henan	355	20	23425	150393	23425					23059	3354.73	0.828211	0.712213	-14.0059	125.983	22.8153	400.36	163.754	712.912	0.050901
Luohe City	Henan	125	9	11674.2	63589	11674.2					9797.79	617.57	0.806936	0.652149	-19.182	65.7704	11.9109	209.011	85.4891	372.182	0.0194026
Puyang City	Henan	146	11	10507.1	60495.4						8881.79	407.7	3.47033	2.86405	-17.4703	95.437	17.2835	303.288	124.05	540.059	0.030913
Jiaozuo City	Henan	194	58	34862.2	191809	34528.1		47.45	242.8		19140	3804.29	1.81312	1.40464	-22.5291	255.102	46.1986	810.686	331.584	1443.57	0.0640759
Xuchang City	Henan	207	11	12896.6	66833						9850.34	410	1.03355	0.913129	-11.6509	96.7835	17.5273	307.568	125.8	547.679	0.0470073
Zhengzhou City	Henan	667	21	25447.7	144791						13594.1	7128.87	1.98973	1.66455	-16.3428	225.27	40.796	715.883	292.808	1274.76	0.0780011
Zhumadian City	Henan	265	10	11353.2	60547.4						10257.6	1445.63	0.436942	0.413942	-5.26373	79.748	14.4422	253.431	103.657	451.278	0.0857335
Hebi City	Henan	89	6	5642.17	31216.6						4580.02	67.394	2.19816	1.82813	-16.8334	65.3712	11.8386	207.743	84.9702	369.923	0.0219755
Qitaihe City	Heilongjiang		3	2023.21	6200				2003.11		0	0	0.066982	0.0669821		31.3109	1.6373	30.5808	15.4067	78.9357
Yichun City	Heilongjiang		14	2669.39	8334.87	2669.39					0		0.005555	0.00555542		60.8364	3.18124	59.4179	29.9348	153.37
Jiamusi City	Heilongjiang		10	5712.1	12471.4	5697.5		14.6			5592.66	0	0.011866	0.0117367	-1.08681	90.4731	4.73099	88.3635	44.5177	228.085	0.209866
Shuangyashan City	Heilongjiang		6	2174.79	15669						1800.89	0	0.006625	0.00659676	-0.420973	44.8307	2.34428	43.7854	22.0592	113.02	0.268478
Harbin City	Heilongjiang		20	27416.6	140999	27416.6					18354.8	0	0.034753	0.0341905	-1.61951	447.05	23.377	436.626	219.973	1127.03	0.695908
Daxing'anling Prefecture	Heilongjiang		4	1584.02	5691				525.82		810	0				29.5979	1.54773	28.9078	14.5638	74.6172
Daqing City	Heilongjiang		11	9662.98	28057.4				1112.2		7490.19	290.87	0.148456	0.141459	-4.71319	235.151	12.2964	229.668	115.707	592.822	0.125779
Mudanjiang City	Heilongjiang		10	8107.36	42300.4	8107.36					1923.5	0	0.026271	0.0262134	-0.217365	117.647	6.15198	114.904	57.8889	296.592	1.3645
Suihua City	Heilongjiang		12	7082.78	44526.7	7062.77					6126.62	0	0.007739	0.00764921	-1.15788	134.973	7.05799	131.826	66.4143	340.272	0.293876
Jixi City	Heilongjiang		16	3736.27	20548.3	3546.85			189.42		552		0.014205	0.0141859	-0.135774	77.8384	4.0703	76.0234	38.3007	196.233	1.44527
Hegang City	Heilongjiang		7	2996.45	9559.3			68.6			2792.17	0	0.012047	0.0119468	-0.829048	59.8759	3.13101	58.4797	29.4622	150.949	0.182075
Heihe City	Heilongjiang		18	3237.84	18427.2	3035.78					1729.45		0.001265	0.00126194	-0.215471	100.995	5.28118	98.6396	49.6948	254.61	1.18178
Qiqihar City	Heilongjiang		15	7278.17	35993.5	7032.07		10	236.1		5407.53	0	0.02082	0.0205755	-1.17197	138.043	7.21849	134.824	67.9245	348.01	0.296946
Shiyan City	Hubei		21	15352	60781.8						14416.1	6.3	0.15522	0.15184	-2.17782	118.495	0.878677	101.975	58.143	279.492	0.128336
Xianning City	Hubei		10	5823.88	16857.8						4519.97	0	0.139195	0.138605	-0.424163	66.6842	0.494484	57.3874	32.7205	157.287	0.370816
Xiaogan City	Hubei		9	11216.8	41075.6						8926.3	748	0.638611	0.624532	-2.20459	144.334	1.07028	124.212	70.8217	340.437	0.154422
Yichang City	Hubei		37	16227.2	54503.9	15510.4			716.88		6187.71	0	0.167895	0.166894	-0.596585	142.542	1.05699	122.669	69.9424	336.211	0.563559
Enshi Tujia & Miao A.P	Hubei		15	5790.56	21739.9						4596.99	1.2	0.033148	0.0330557	-0.276956	98.3549	0.729333	84.6427	48.2607	231.988	0.837633
Wuhan City	Hubei		24	52675.4	318032	52273.9					43702.7	351.198	0.611801	0.571005	-6.66815	580.328	4.30331	499.421	284.755	1368.81	0.205275
Administrative units directly under the Jurisdiction	Hubei		15	8755.27	18051.6			95.61			2204.45	0	0.404153	0.402735	-0.350913	92.3633	0.684903	79.4864	45.3207	217.855	0.620825
Jingzhou City	Hubei		22	12880.1	39270.5	12880.1					8183.59	0.34	0.335648	0.333055	-0.772654	85.8215	0.636393	73.8566	42.1108	202.425	0.261987
Jingmen City	Hubei		7	8231.38	27710						5142.42	0	0.522846	0.516525	-1.20901	52.2085	0.387142	44.9298	25.6176	123.143	0.101855
Xiangyang City	Hubei		9	10851	78089.5	10679.5					7623.78	24.29	0.774892	0.761607	-1.71438	83.6018	0.619933	71.9464	41.0217	197.19	0.115021
Ezhou City	Hubei		6	4114.72	17653.8						408.71		1.02797	1.02472	-0.316563	29.8915	0.221655	25.7242	14.6672	70.5046	0.222719
Suizhou City	Hubei		3	3774.69	10858.1						3180		0.351759	0.347487	-1.2143	23.5232	0.174432	20.2437	11.5423	55.4836	0.0456919
Huanggang City	Hubei		14	9379.91	25716.8	9379.91					4212.32	33.89	0.216428	0.215738	-0.31857	77.7176	0.5763	66.8825	38.1344	183.311	0.575418
Huangshi City	Hubei		8	8742.28	29101.6						8265.62	10.8	0.478385	0.468336	-2.10059	68.7405	0.509733	59.157	33.7296	162.137	0.0771864
Loudi City	Hunan	169.47	7	8827.84	34713.6						8717.85	38	0.199008	0.196778	-1.12044	123.077	1.78338	124.104	108.083	357.047	0.318668
Yueyang City	Hunan	304.02	13	12427	50446.3						7579.88	0	0.269572	0.268045	-0.566263	145.264	2.10487	146.476	127.567	421.412	0.744198
Changde City	Hunan	278.13	13	12246.4	36997.1						9486.39	31.6	0.278303	0.276345	-0.703557	102.806	1.48965	103.663	90.2816	298.24	0.423903
Zhangjiajie City	Hunan	67.99	10	3017.36	9860.2						500.05	0	0.057121	0.0570886	-0.0558661	35.8828	0.519941	36.1821	31.5114	104.096	1.86334
Huaihua City	Hunan	209.54	13	8482.82	21670.4						7552.02	0	0.075064	0.0748231	-0.320878	108.209	1.56796	109.112	95.0271	313.917	0.978306
Zhuzhou City	Hunan	248.43	19	18462.1	64199.5	18432.7		29.38			15067.6	0	0.189031	0.186639	-1.26505	262.796	3.80791	264.988	230.781	762.372	0.602641
Yongzhou City	Hunan	240.26	12	10066	30642.8						5173.62	0	0.100238	0.100033	-0.205207	117.638	1.70458	118.62	103.307	341.27	1.66306
Xiangtan City	Hunan	164.56	6	14093.1	41495.5						13949.7	50.1	0.506368	0.48887	-3.45557	100.474	1.45587	101.312	88.2338	291.475	0.0843494
West Hunan Tujia & Miao A.P	Hunan	108.36	10	6137.49	22508.5	6137.49					4287.11	0	0.073693	0.0734394	-0.343715	60.6278	0.878497	61.1335	53.242	175.882	0.511708
Yiyang City	Hunan	204.58	8	8154.31	39853						8154.31	0	0.206593	0.204924	-0.808034	70.4082	1.02021	70.9955	61.8309	204.255	0.25278
Hengyang City	Hunan	361.01	15	12662.2	48882.7	12511			151.11		5128.62	0	0.273512	0.272341	-0.428053	223.421	3.23737	225.285	196.203	648.146	1.51417
Shaoyang City	Hunan	304.63	12	10855.4	57013.8						7745.16	0	0.150251	0.149605	-0.429631	114.366	1.65717	115.32	100.434	331.778	0.772238
Chenzhou City	Hunan	238.12	12	8954.33	32115.9			362			8592.33	0	0.118124	0.117633	-0.415774	78.4729	1.13707	79.1275	68.9131	227.651	0.547536
Changsha City	Hunan	552.78	24	43200.3	270147	43200.3					43177.5	0	0.33819	0.325472	-3.76052	231.421	3.35329	233.352	203.229	671.355	0.178527
Jilin City	Jilin		7	13745	120708						971.58	0	0.045703	0.0456192	-0.183257	167.572	7.0363	210.751	112.138	497.497	2.71474
Siping City	Jilin		5	6219.68	24288						332.2	0	0.068497	0.0682006	-0.432371	72.3406	3.03755	90.9806	48.4096	214.768	0.496723
Yanbian Korean A.P	Jilin		9	9376.87	31654.5						3914.47	0				117.475	4.93274	147.745	78.6133	348.766
Songyuan City	Jilin		4	4786.07	20313.3						4335.43		0.039694	0.0384511	-3.13174	91.4448	3.83973	115.008	61.194	271.486	0.0866887
Baicheng City	Jilin		5	2436.52	9130						456.08	0	0.007031	0.00701867	-0.177141	49.2937	2.06982	61.9952	32.9868	146.345	0.826117
Baishan City	Jilin		5	3245.92	13800.3						2144.86	0	0.00858	0.00854593	-0.400116	57.8943	2.43096	72.812	38.7423	171.879	0.429562
Liaoyuan City	Jilin		3	3645.89	20477.5						3172.41	10.22	0.074319	0.0694832	-6.50633	49.8609	2.09364	62.7086	33.3664	148.03	0.0227516
Tonghua City	Jilin		6	5069.08	26156.5						3828.11	0	0.017716	0.0175348	-1.02294	102.72	4.31319	129.189	68.7395	304.962	0.298124
Changchun City	Jilin		15	17590.8	123629	14945.8					5710.99	1196.76	0.108785	0.101516	-6.6819	301.476	12.6588	379.157	201.745	895.036	0.133949
Nanjing City	Jiangsu	670.4	64	36493	238746	36290.2					28363.7	6781.12	0.264944	0.23579	-11.0037	434.305	10.7745	354.722	142.732	942.534	0.0856559
Nantong City	Jiangsu	458.15	97	40082	319522	38381.8	1631.94		68.236		27583.2	880.75	0.035952	0.0331093	-7.908	396.887	9.8462	324.16	130.435	861.329	0.108919
Suqian City	Jiangsu	269.53	21	13797.3	70639.9	13797.3					12018.7	405.769	0.033621	0.0302329	-10.0777	150.814	3.74147	123.178	49.564	327.297	0.0324774
Changzhou City	Jiangsu	329.1	39	21980.9	270123						7881.76	1483.4	0.070972	0.0653889	-7.86674	271.047	6.72429	221.38	89.0781	588.229	0.0747742
Xuzhou City	Jiangsu	529.24	59	32061.6	165481	27007.4			4888.83		21376.4	2137.97	0.0761	0.0657108	-13.6517	264.263	6.55599	215.839	86.8485	573.506	0.0420098
Yangzhou City	Jiangsu	281.53	45	23975.2	127705	23975.2					16857.9	1299.71	0.047548	0.0421992	-11.249	204.212	5.06621	166.792	67.1131	443.183	0.0393975
Wuxi City	Jiangsu	490.93	77	63410.6	564532				35.07		62466.1	4682.05	0.096736	0.0745532	-22.9315	652.718	16.193	533.112	214.512	1416.54	0.0617724
Taizhou City	Jiangsu	285.69	32	11744.1	24826.2	11744.1					7689.52	188.905	0.02482	0.0238228	-4.01913	207.918	5.15814	169.818	68.3309	451.225	0.112269
Huai'an City	Jiangsu	283.31	26	16287.1	88732.6						12110.7	18.469	0.028718	0.0280698	-2.25687	161.559	4.00805	131.955	53.0955	350.618	0.155355
Yancheng City	Jiangsu	434.43	54	17590.6	73019.3	16997.3					9895.07	21.9	0.008734	0.00861437	-1.3706	244.169	6.05749	199.427	80.2449	529.899	0.386618
Suzhou City	Jiangsu	795.14	123	100484	804672						95910.6	4449.45	0.110989	0.0908877	-18.1113	1168.18	28.9809	954.122	383.916	2535.2	0.139979
Lianyungang City	Jiangsu	262.61	42	11924.4	39386.9						7581.62	12.765	0.053864	0.0518257	-3.78475	123.702	3.06887	101.035	40.6539	268.459	0.0709318
Zhenjiang City	Jiangsu	215.78	35	16191.5	77826.1						12317.3	510.11	0.0513	0.0479639	-6.50302	199.092	4.93918	162.609	65.4303	432.07	0.0664415
Shangrao City	Jiangxi	317.895	29	10490.7	40922.8	9943.2			547.5		8836.92	0	0.001163	0.00116029	-0.241167	128.661	7.12627	163.61	111.419	410.816	1.70322
Jiujiang City	Jiangxi	243.993	25	12547.9	42360.5	12311.3			236.61		9503.5	227.66	0.004352	0.00421025	-3.25952	120.609	6.68027	153.371	104.446	385.106	0.118148
Nanchang City	Jiangxi	379.477	22	18705.4	104999	18683.5			21.94		15674.9	0	0.047931	0.0471307	-1.67026	154.205	8.54107	196.092	133.539	492.377	0.294792
Jian City	Jiangxi	226.186	15	6868.54	25091.3						5127.77		0.001269	0.00126639	-0.181918	56.2353	3.11476	71.5109	48.699	179.56	0.987145
Yichun City	Jiangxi	247.047	28	11257.6	36485.5	11199.2		58.37			5791.47	0	0.002032	0.00202686	-0.257518	87.2565	4.83295	110.959	75.5629	278.611	1.08207
Fuzhou City	Jiangxi	179.557	14	7880.65	40579.8						2712.64	0	0.002021	0.00201922	-0.101915	84.2012	4.66373	107.073	72.9171	268.855	2.63828
Xinyu City	Jiangxi	79.861	8	6354.23	24142.2			3.55			6051.63	0	0.016677	0.0163966	-1.68123	32.3053	1.78932	41.0806	27.9759	103.151	0.0613544
Jingdezhen City	Jiangxi	104.222	4	4546.17	17762.2						0	264	0.006262	0.00593853	-5.1623	30.9593	1.71477	39.3689	26.8103	98.8533	0.0191491
Pingxiang City	Jiangxi	125.243	4	3789.89	10630.5						3789.89	30	0.009378	0.00922375	-1.64448	34.735	1.9239	44.1703	30.08	110.909	0.0674433
Ganzhou City	Jiangxi	388.967	22	11069.1	44265.5	11069.1					7927.2	5.5	0.002972	0.00296365	-0.265284	109.288	6.05323	138.975	94.6418	348.958	1.31539
Yingtan City	Jiangxi	64.3317	5	3929.46	5578.9						3929.46		0.003982	0.00395452	-0.694969	28.7633	1.59314	36.5765	24.9086	91.8416	0.132155
Dandong City	Liaoning		4	5446.4	27690						4345	0	0.012443	0.0123199	-0.989644	59.132	0.158165	38.1085	76.0007	173.399	0.175213
Dalian City	Liaoning		22	35977.9	163911		32450.9		340		2175.93	12790.1	0.343646	0.227218	-33.8803	243.297	0.650764	156.796	312.702	713.446	0.0210578
Fushun City	Liaoning		5	14475.2	67764.9						13204		0.109458	0.102476	-6.37862	42.3416	0.113254	27.2877	54.4205	124.163	0.0194655
Chaoyang City	Liaoning		9	9024.16	75577.4				1825		4213.8	1825	0.086873	0.0508437	-41.4734	79.2209	0.211898	51.0551	101.82	232.308	0.00560139
Benxi City	Liaoning		6	10228.3	6829.6						9539.4	0	0.129026	0.12313	-4.57	41.6322	0.111357	26.8305	53.5087	122.083	0.026714
Shenyang City	Liaoning		40	22089.7	165310	20594.8			136.728		2050.59	1277.61	0.377852	0.364468	-3.5421	264.145	0.706528	170.232	339.498	774.581	0.218678
Panjin City	Liaoning		13	7957.98	31920.4						7491.2		0.461974	0.309459	-33.0137	67.8819	0.181569	43.7476	87.2467	199.058	0.00602956
Yingkou City	Liaoning		7	7069.72	33110.5						3804.17	409.71	0.105449	0.0941408	-10.724	139.658	0.373553	90.0047	179.498	409.534	0.0381886
Huludao City	Liaoning		13	6686.86	13097				32.17		6616.25	710.3	0.07413	0.0589334	-20.4997	66.8294	0.178754	43.0692	85.8939	195.971	0.00955972
Liaoyang City	Liaoning		6	8946.32	56309				1450.55		1690.13	150	0.133707	0.129314	-3.28542	53.9148	0.14421	34.7462	69.2951	158.1	0.0481219
Tieling City	Liaoning		8	9565.55	44496						8053.85	888.2	0.029606	0.0214218	-27.6447	53.3324	0.142652	34.3709	68.5466	156.393	0.00565723
Jinzhou City	Liaoning		9	13964.5	54641.7						13605.7	402.641	0.270858	0.210032	-22.4568	87.7501	0.234712	56.5519	112.783	257.319	0.0114584
Fuxin City	Liaoning		5	8034	55988						8034	0	0.172483	0.145593	-15.5897	79.138	0.211676	51.0017	101.714	232.065	0.0148858
Anshan City	Liaoning		10	12511.5	76794.8						9585.91	0	0.174971	0.165825	-5.22718	137.706	0.368332	88.7466	176.989	403.81	0.0772519
Ulanqab City	Inner Mongolia		14	3656	19901				374		0	486	0.751669	0.74518	-0.863233	107.703	19.4049	131.329	58.5506	316.987	0.36721
Wuhai City	Inner Mongolia		4	2679.91	18461.1				1805.33		436.58	578.84	9.10345	7.73881	-14.9903	28.9172	5.21002	35.2604	15.7202	85.1078	0.00567751
Xingan League	Inner Mongolia		6	2742	5550						2553	565	0.242646	0.240437	-0.910298	73.6789	13.2748	89.8409	40.054	216.849	0.238217
Baotou City	Inner Mongolia		12	14901	110146	14585.8			60.16		13442.5	5458	1.8879	1.44512	-23.4534	259.263	46.7115	316.134	140.943	763.051	0.0325348
Hulunbuir City	Inner Mongolia		14	7776.9	33528.8				401.93		2153.54	1140	0.046094	0.0457414	-0.765456	234.194	42.1948	285.566	127.315	689.27	0.90047
Hohhot City	Inner Mongolia		14	10121.3	31009.4			283.18	311		1065.43	577.27	1.20513	1.1837	-1.77797	202.285	36.4457	246.657	109.968	595.355	0.334851
Bayannur City	Inner Mongolia		8	4890.41	35854				4648.88		241.526	584.634	11.0633	10.9926	-0.639358	119.823	21.5886	146.108	65.1395	352.659	0.551583
Chifeng City	Inner Mongolia		15	12740.6	72593.6						3892.31	828.5	0.832527	0.814943	-2.1122	201.063	36.2257	245.168	109.304	591.762	0.280163
Tongliao City	Inner Mongolia		10	8915.25	55344.2	7307					6364	147.6	0.811981	0.796511	-1.90526	116.29	20.9521	141.8	63.2189	342.261	0.17964
Erdos City	Inner Mongolia		18	5955.4	61690.4	3141.61			1490.17		836.37	4479.86	0.864388	0.835838	-3.30289	332.896	59.978	405.919	180.972	979.765	0.296639
Xilingol League	Inner Mongolia		9	2264.08	10357			314	349.08		142	266	0.165411	0.164373	-0.627638	115.152	20.7469	140.411	62.5998	338.909	0.539976
Alxa League	Inner Mongolia		4	1055.83	2546.99				854.63		0	458.163	2.87252	2.85954	-0.451837	80.377	14.4816	98.0084	43.6953	236.562	0.523556
Wuzhong City	Ningxia	62.9933	6	3639.03	32849.6						989.275	389.06	15.1556	13.8988	-8.29253	67.1118	0.0303924	24.3956	47.855	139.393	0.0168094
Guyuan City	Ningxia	39.1976	5	817.04	8733.86						70.44	33.76	0.370655	0.369222	-0.386597	26.7369	0.0121082	9.71905	19.0651	55.5332	0.143646
Shizuishan City	Ningxia	58.0565	4	2960.06	9945	1581.23			1378.83		1014.6	560.88	9.78044	8.92562	-8.74019	72.1558	0.0326767	26.2291	51.4516	149.869	0.0171471
Yinchuan City	Ningxia	164.042	9	14568.8	89971.1	14394.8			173.99		7151.29	505.99	13.8289	8.93263	-35.406	125.147	0.0566746	45.4919	89.238	259.934	0.00734152
Haidong City	Qinghai		5	1050.01	5258.7						625.81		0.429834	0.427613	-0.516661	106.628	0.434538	10.4724	47.8	165.335	0.320007
Haibei Zang A.P	Qinghai		0		1238.97						0		0.029539	0.0295389		58.7081	0.239251	5.76595	26.3181	91.0314
Hainan Zang A.P	Qinghai		5	537.94	3217.7			13.1			483.5	0	0.09269	0.0925441	-0.157602	29.4148	0.119873	2.88894	13.1863	45.6099	0.289398
Haixi Mongolian & Zang A.P	Qinghai		2	1810.14	6072.23				1810.14		0	689.636	0.080356	0.0798165	-0.671016	49.9949	0.203742	4.91019	22.412	77.5209	0.115528
Xining City	Qinghai		11	7418.35	77099.5						936.35	420.731	0.468836	0.461791	-1.50262	224.447	0.914683	22.0438	100.617	348.023	0.23161
Huangnan Zang AP	Qinghai		1	37.01	615.4						37.01		0.029429	0.029423	-0.0193926	16.2662	0.0662891	1.59756	7.29192	25.222	1.30054
Dongying City	Shandong	138.29	14	13171.3	55067.9				1174.2		9372.8		1.99802	1.68471	-15.6807	140.72	1.09135	127.676	66.4634	335.951	0.0214245
Linyi City	Shandong	554.97	28	35130.3	40911.1						35130.3	409.1	0.79694	0.683693	-14.2102	257.547	1.99739	233.673	121.642	614.859	0.0432687
Weihai City	Shandong	177.2	33	13362.6	89270.6	4537.72					1750.72	513.7	0.652733	0.626831	-3.96824	146.843	1.13883	133.23	69.355	350.567	0.0883431
Dezhou City	Shandong	297.04	25	20972.4	90281.2				2308.83		16695.6	14.9	1.54019	1.35784	-11.8397	183.338	1.42186	166.343	86.5919	437.694	0.0369684
Rizhao City	Shandong	157.85	24	11712.2	59739.1				1531.9		8982.23	1740.83	0.757037	0.645368	-14.7508	132.527	1.0278	120.242	62.5936	316.39	0.021449
Zaozhuang City	Shandong	207.33	19	15804.9	83171						9945.76	267.5	1.32898	1.0875	-18.1698	138.865	1.07695	125.992	65.5869	331.521	0.0182457
Taian City	Shandong	319.47	20	17369.2	80474.3						12710.9	1214.3	1.45328	1.23909	-14.7387	112.229	0.870385	101.826	53.0068	267.932	0.0181788
Jinan City	Shandong	484.69	45	32654.7	170897	32054.7			599.955		28805	2408.55	1.35672	1.07468	-20.788	282.984	2.19466	256.752	133.656	675.587	0.0324988
Jining City	Shandong	437.82	47	33495.2	126030				426.12		28422.2	3392.57	1.69176	1.38521	-18.12	278.077	2.15661	252.3	131.338	663.872	0.0366375
Zibo City	Shandong	312.22	16	28205.6	217787						16703	2729.9	1.51847	1.19594	-21.2402	184.645	1.432	167.528	87.2093	440.815	0.0207538
Binzhou City	Shandong	210.79	17	17535.7	161065				511.22		14457.3	115	1.44967	1.27516	-12.0379	159.229	1.23489	144.468	75.2051	380.137	0.0315784
Weifang City	Shandong	517.63	40	51544.5	350715						36864.5	1596.23	1.21949	0.902084	-26.0277	451.683	3.50299	409.812	213.333	1078.33	0.0414301
Yantai City	Shandong	423.31	38	29630.7	179911			36.5	106.99		3042.45	212.515	0.49375	0.484173	-1.93969	205.858	1.59651	186.775	97.2284	491.458	0.25337
Liaocheng City	Shandong	275.54	23	27606.9	113584	22903.6			4329.83		15018.5	3795.46	2.727	2.17668	-20.1803	199.559	1.54766	181.06	94.2532	476.419	0.0236082
Laiwu City	Shandong	79.53	15	4463.21	32088				752.694		3676.7	1818.12	1.53039	1.18851	-22.3391	23.812	0.184672	21.6047	11.2466	56.8479	0.00254478
Heze City	Shandong	383.58	42	19831.9	95811.8						17956.1	795.5	1.07483	0.985021	-8.35562	210.721	1.63423	191.187	99.5253	503.068	0.0602071
Qingdao City	Shandong	636.66	33	50717.5	437502	16604.2					16189.4	179.798	3.05226	1.94746	-36.1962	499.485	3.87371	453.183	235.911	1192.45	0.0329441
Linfen City	Shanxi	215.66	26	6547.15	32183.2	5567.92			962.77		3038.81	572.06	0.922138	0.88234	-4.31578	171.756	0.839658	451.597	76.7526	700.945	0.162414
Luliang City	Shanxi	177.212	28	4223.08	23252.9				1211.6		1250.89	392.06	0.496469	0.487763	-1.75357	162.883	0.796278	428.266	72.7873	664.732	0.379075
Datong City	Shanxi	207.861	18	8954.88	67914.2						5448.55	1368.1	0.849462	0.773081	-8.99173	165.234	0.807775	434.449	73.8383	674.33	0.0749944
Taiyuan City	Shanxi	364.513	14	24760.7	206803	22925.6			1835.15		21181	3001.11	1.75026	1.12251	-35.8658	326.858	1.5979	859.405	146.063	1333.92	0.0371921
Xinzhou City	Shanxi	145.478	17	6312.84	21715.9				2393.58		3578.26	236.08	0.45507	0.442263	-2.81432	112.749	0.551192	296.45	50.3841	460.134	0.163498
Jinzhong City	Shanxi	172.535	21	7261.89	45970.9				5639.5		1574.56	294.819	0.772831	0.757221	-2.01989	163.483	0.799214	429.844	73.0556	667.182	0.330306
Jincheng City	Shanxi	132.927	34	7215.3	27442.5				7.3		709.2	35.88	0.431032	0.427638	-0.787354	147.657	0.721843	388.232	65.9833	602.594	0.76534
Shuozhou City	Shanxi	93.6733	6	3071.95	18231.7				366		1508.89	576.58	0.968723	0.929351	-4.0643	64.1314	0.313517	168.62	28.6584	261.723	0.0643957
Yuncheng City	Shanxi	243.322	17	8879.62	36285.6	8124.75		206.5	548.37		3655.72	811.138	1.38472	1.33604	-3.51552	172.815	0.844832	454.38	77.2256	705.265	0.200615
Changzhi City	Shanxi	171.091	28	10637.4	57449.2				309.128		9608.98	2637.27	0.572389	0.493269	-13.8228	294.712	1.44075	774.884	131.698	1202.73	0.0870111
Yangquan City	Shanxi	92.0917	8	5187.11	26739				306		4780.73	784.409	0.66332	0.547208	-17.5047	33.4401	0.163477	87.9238	14.9434	136.471	0.00779623
Xianyang City	Shaanxi		17	14916.2	128247	14648.4			267.83		9321.26	787	2.07263	1.75358	-15.3932	151.803	21.4571	269.942	148.947	592.15	0.0384683
Shangluo City	Shaanxi		7	2563.89	23568.6				290.9		2082.99	2.83	0.098134	0.0974715	-0.674958	37.1317	5.24847	66.0287	36.433	144.842	0.214594
Ankang City	Shaanxi		11	2911.08	20490.4				105.84		1928.44	0	0.072705	0.0725648	-0.193284	62.9976	8.90457	112.024	61.8123	245.739	1.27139
Baoji City	Shaanxi		16	9535.18	51217.4				9.72		8993.73	72	0.306028	0.295481	-3.44631	60.3822	8.53488	107.374	59.246	235.537	0.0683446
Yan'an City	Shaanxi		18	3275.67	12892.5	3177.08			98.59		320.14	21.03	0.334184	0.332557	-0.486622	47.8231	6.75968	85.0406	46.9233	186.547	0.38335
Yulin City	Shaanxi		17	6892.08	46837.3				1204.78		4574.07	81.97	0.401247	0.391514	-2.42588	105.301	14.884	187.249	103.319	410.754	0.169322
Hanzhong City	Shaanxi		11	7513.73	38640.9				55.4		3111.89	0	0.14922	0.148797	-0.283205	71.9898	10.1756	128.015	70.6352	280.815	0.991561
Weinan City	Shaanxi		14	8680.62	51979				563		7139.95	0	1.56642	1.45595	-7.0525	92.019	13.0067	163.631	90.2876	358.945	0.0508961
Xi'an City	Shaanxi		36	56868.9	389861	56585.9			283		22714.1	812.057	0.809609	0.732031	-9.58215	419.779	59.3348	746.464	411.88	1637.46	0.170886
Tongchuan City	Shaanxi		13	1388.01	7064.59				14.6		1173.23	88.45	0.42723	0.40099	-6.1418	11.0531	1.56233	19.655	10.8452	43.1156	0.00702003
Shanghai	Shanghai	2116	49	65985.9	517797	44923.4					33349.9	180.568	2.24841	2.09937	-6.62837	808.808	41.7378	656.643	907.141	2414.33	0.364242
Leshan City	Sichuan	154.254	34	7422.61	22266.6						7297.44	0	0.137587	0.136582	-0.730185	64.4963	1.97107	119.965	31.518	217.95	0.298486
Neijiang City	Sichuan	170.568	9	5351.1	20637.5	5351.1					5220.75	37.5	0.722855	0.695019	-3.85086	57.4334	1.75522	106.827	28.0665	194.083	0.0503998
Liangshan Yi A.P	Sichuan	151.819	23	2551.5	2479.34	2490.96		18.35	42.19		2445.03	0	0.054945	0.0549081	-0.0672945	32.2326	0.985058	59.9534	15.7514	108.922	1.6186
Nanchong City	Sichuan	278.87	41	9857.35	50575.2	9857.35					8901.06	38.16	0.350941	0.342861	-2.30252	69.0281	2.10956	128.394	33.7327	233.264	0.101308
Yibin City	Sichuan	202.499	49	5558.74	27613.1				12.78		3512.21	0	0.145776	0.145187	-0.403743	45.0643	1.37721	83.8207	22.022	152.284	0.377181
Bazhong City	Sichuan	124.889	21	3346.28	10113.6				28.8		1096.78	0	0.090831	0.0906598	-0.188321	28.0435	0.857035	52.1616	13.7043	94.7664	0.503215
Guangyuan City	Sichuan	107.383	31	6004.93	24807	6004.93					2950.11	0	0.094918	0.0945011	-0.439038	67.7961	2.07191	126.102	33.1306	229.101	0.521826
Guangan City	Sichuan	120.838	22	4750.04	12628.8						4155.69	11.125	0.29648	0.291799	-1.57903	40.2868	1.2312	74.9345	19.6874	136.14	0.0862172
Deyang City	Sichuan	170.285	19	10303.1	35067.3						8896.43	0	0.741909	0.715496	-3.56005	61.6457	1.88395	114.662	30.125	208.317	0.0585153
Chengdu City	Sichuan	1047.57	222	65004.6	306461						54664.4	339.946	1.12813	1.02091	-9.50365	531.775	16.2515	989.113	259.867	1797.01	0.189086
Panzhihua City	Sichuan	79.7921	8	2999.34	15617						2623.56	0	0.170852	0.169853	-0.584802	33.8258	1.03375	62.9167	16.53	114.306	0.195461
Luzhou City	Sichuan	197.462	52	5069.54	14475.9						4809.62	27.715	0.162196	0.160952	-0.766573	59.1855	1.80876	110.086	28.9228	200.003	0.260906
Ganzi Zang A.P	Sichuan	32.6871	1	217.2	292						217.2		0.004398	0.00439754		3.17863	0.097142	5.91233	1.55333	10.7414	2.95766
Meishan City	Sichuan	125.664	15	4222.9	16804.1						4222.9	0	0.310282	0.30731	-0.957741	36.0237	1.10092	67.0049	17.604	121.734	0.127105
Mianyang City	Sichuan	229.051	19	12207.2	28477.1				26.14		12091.6	0	0.236683	0.233124	-1.50338	98.5943	3.01313	183.388	48.181	333.176	0.221618
Zigong City	Sichuan	132.637	44	6851.7	12984.2			23.967			6264.44	0	0.615134	0.5853	-4.84997	51.5663	1.57591	95.9144	25.1994	174.256	0.0359293
Ziyang City	Sichuan	140.987	10	4253.05	9271.75	4253.05					4194.19		0.580779	0.568395	-2.13234	32.1279	0.981859	59.7587	15.7003	108.569	0.0509153
Dazhou City	Sichuan	227.548	12	6195.16	21136.5						6195.16	0	0.154792	0.153521	-0.821318	69.027	2.10953	128.392	33.7321	233.261	0.284008
Suining City	Sichuan	151.044	19	7964.12	20559						7755.41	0	0.6315	0.596631	-5.52162	49.7316	1.51984	92.5019	24.3028	168.056	0.030436
Aba Zang & Qiang A.P	Sichuan	34.1998	11	901.878	1822.66	901.878					901.878	0	0.00787	0.00786765	-0.0269893	26.4773	0.80917	49.2484	12.9389	89.4738	3.31634
Yaan City	Sichuan	65.8163	10	2088.29	10346.6						1730.31	0	0.057048	0.0569575	-0.158959	25.1064	0.767274	46.6985	12.269	84.8411	0.533732
Tianjin	Tianjin	1278	59	42757.3	417305	32052.9	4950.12	216.31	4135.36		29720.9	6624.89	2.25219	1.74035	-22.7263	456.786	65.4979	565.972	570.361	1658.62	0.0729822
Urumqi City	Xinjiang	206.349	13	21448.4	91234.3				13173.5		4146.39	2861.18	0.819069	0.77351	-5.56229	195.908	164.999	123.809	115.003	599.718	0.107819
Kazak A.P	Xinjiang	203.578	0								0					13.6601	11.5049	8.6328	8.01883	41.8166
Ili	Xinjiang	203.578	13	4089.13	25065.8				49.7		886.22	0	0.026746	0.0267309	-0.0552202	74.0012	62.326	46.7669	43.4408	226.535	4.1024
Kizilsu Kirgiz A.P	Xinjiang	12.7315	4	176.47	473.6				23		0		0.178947	0.178947		8.84159	7.44665	5.58766	5.19026	27.0662
Karamay City	Xinjiang	29.6799	5	5135.75	15613.4				5135.75		0	786.1	9.29305	9.1725	-1.29719	25.7437	21.6822	16.2694	15.1123	78.8076	0.0607523
Bortala Mongolian A.P	Xinjiang	23.1423	4	662.57	4640			203.76	111.6		0	164.56	0.605501	0.604881	-0.102402	23.8884	20.1195	15.0968	14.0231	73.1279	0.714125
Turpan Prefecture	Xinjiang	23.584	1	5.81	2940			153.47	5.81		0		1.22566	1.22566		15.4501	13.0125	9.76404	9.06961	47.2962
Hotan Prefecture	Xinjiang	61.8404	0		5363.67						0	0	0.398794	0.398794		12.2523	10.3193	7.74316	7.19246	37.5072
Hami Prefecture	Xinjiang	33.7146	3	1329.45	1258.9			15			0	426	0.730116	0.72722	-0.396648	25.4219	21.4111	16.066	14.9234	77.8224	0.1962
Kashi Prefecture	Xinjiang	109.009	13	5330.08	22447.6				824.866		0	248.75	1.43585	1.43555	-0.0209104	51.4016	43.292	32.4845	30.1742	157.352	7.52508
Tacheng Prefecture	Xinjiang	45.5476	7	2097.72	7435.19				1381.32		0	0	0.668475	0.668475		25.4544	21.4384	16.0865	14.9424	77.9217
Bayingolin Mongolian A.P	Xinjiang	63.7553	9	3981.45	10144.4						38.88	7.2	0.394433	0.394416		38.4898	32.4173	24.3246	22.5946	117.826	28.8933
Changji Hui A.P	Xinjiang	57.6085	10	3177.88	19250.1			854.5	275.587		276.46	386.5	1.12266	1.12093	-0.154651	62.0211	52.2361	39.1958	36.4081	189.861	1.22768
Aksu Prefecture	Xinjiang	83.0433	8	5014.54	23928.3				1080		182.5	860.742	1.63323	1.63147	-0.107636	56.9378	47.9547	35.9832	33.4241	174.3	1.61934
Altay Prefecture	Xinjiang	26.9529	5	990.735	2365.44			208.75			0	635.9	0.290434	0.289871	-0.193931	29.0296	24.4496	18.3459	17.0412	88.8663	0.458236
Lincang City	Yunnan	92.5	7	1994.01	5118.2						1088.54	0	0.076003	0.0759356	-0.0890725	33.1431	0.989176	17.6615	30.4063	82.2001	0.922849
Lijiang City	Yunnan	45.6	6	2630.73	10896.9						2396.34	525.3	0.097973	0.0966942	-1.30519	62.5718	1.86749	33.3436	57.405	155.188	0.1189
Baoshan City	Yunnan	82.6	6	3448.59	11510.5			705.6			3448.6		0.094531	0.0942491	-0.298463	40.1703	1.19891	21.4062	36.8533	99.6287	0.333805
Dali Bai A.P	Yunnan	149.6	13	4495.89	17947.3				172.48		1066.44	10	0.171314	0.171049	-0.155047	90.8012	2.71002	48.3866	83.3033	225.201	1.45247
Dehong Dai & Jingpo A.P	Yunnan	53.3	4	1756.24	7062.93			20.79			137.64		0.061216	0.0612085	-0.0117829	35.6067	1.0627	18.9743	32.6665	88.3102	7.4948
Nujiang Lisu A.P	Yunnan	15.3	3	261.24	1158.77						79.24	0.36	0.011953	0.0119518	-0.00759658	18.5132	0.552538	9.86542	16.9845	45.9156	6.04216
Wenshan Zhuang & Miao A.P	Yunnan	134.1	7	2877.89	14725.2				17.69		2702.45	3.133	0.056837	0.0567441	-0.163684	38.5016	1.1491	20.517	35.3224	95.4901	0.583384
Kunming City	Yunnan	467.7	20	38852.4	258379	38370.5			356.37		30000.7	16.56	0.281048	0.26888	-4.32948	293.471	8.75882	156.387	269.238	727.854	0.168116
Zhaotong City	Yunnan	158.5	10	4553.35	16183.4	4553.35					2127.25	1.623	0.071374	0.071258	-0.162987	53.4245	1.59449	28.4692	49.013	132.501	0.812961
Puer City	Yunnan	101.2	11	2891.37	12475.3			157.75			1438.93	0	0.038261	0.0382417	-0.0494399	50.6665	1.51217	26.9994	46.4827	125.661	2.54167
Qujing City	Yunnan	269.6	10	8458.85	35385.1			125.49			1961.64	33.606	0.093329	0.0931874	-0.151651	70.4092	2.1014	37.52	64.5952	174.626	1.1515
Chuxiong Yi A.P	Yunnan	110.5	11	4904.29	23984.2						4737.18	0	0.182211	0.180532	-0.921563	67.3661	2.01058	35.8984	61.8034	167.078	0.181299
Yuxi City	Yunnan	111.2	11	4762.63	25186.9						2034.93	0	0.210917	0.209894	-0.484813	62.7344	1.87235	33.4302	57.5541	155.591	0.32093
Honghe Hani & Yi A.P	Yunnan	199.8	12	6948.77	17874.1						5528.36	0	0.094512	0.0941795	-0.351559	94.4129	2.81781	50.3112	86.6167	234.159	0.666058
Xishuangbanna Dai A.P	Yunnan	50.5	3	1831.31	7865.24						1831.31		0.05707	0.0569641	-0.185952	24.6493	0.735672	13.1352	22.6139	61.134	0.328763
Diqing Zang A.P	Yunnan	12.7	3	522.41	575.25			20.6	63.55		0		0.016114	0.0161137		18.3009	0.546202	9.7523	16.7897	45.3892
Lishui City	Zhejiang	120.64	20	6812.37	41720.1						6133.16	1.085	0.029934	0.0298627	-0.239271	74.3763	0.867613	119.266	24.3387	218.849	0.914653
Taizhou City	Zhejiang	364.755	25	23146.3	127216	15529.4	4426.3				9928.06	2462.55	0.163308	0.159497	-2.33336	287.169	3.34988	460.491	93.9725	844.982	0.362131
Jiaxing City	Zhejiang	279.227	22	20983.8	171826				559		6891.38	485.18	0.489164	0.479389	-1.99833	129.692	1.51288	207.968	42.4401	381.613	0.190966
Ningbo City	Zhejiang	556.357	28	55018	340434						23370.9	4959.11	0.163916	0.157069	-4.17713	338.977	3.95423	543.566	110.926	997.423	0.238782
Hangzhou City	Zhejiang	679.055	38	33174.2	166832						26714.1	6246.6	0.145528	0.141336	-2.88078	408.574	4.76609	655.168	133.7	1202.21	0.41732
Wenzhou City	Zhejiang	619.956	42	34982	254647				30		25952.9	39.9	0.122833	0.120794	-1.65962	318.734	3.71809	511.106	104.302	937.86	0.565104
Huzhou City	Zhejiang	174.64	34	20313.5	141052						12866.3	2208.36	0.272098	0.262878	-3.38826	232.803	2.71569	373.312	76.1818	685.012	0.202172
Shaoxing City	Zhejiang	313.978	5	17109.8	94813						11894.5	558	0.173457	0.171029	-1.39973	65.6183	0.765449	105.222	21.4727	193.079	0.13794
Zhoushan City	Zhejiang	77.0688	20	3646.68	31005.5						0	193.371	0.126486	0.124844	-1.29779	51.1124	0.596235	81.9612	16.7259	150.396	0.115886
Quzhou City	Zhejiang	107.077	14	8234.59	32693.1						4305.42	256.325	0.082209	0.0818368	-0.452204	96.9052	1.13042	155.392	31.711	285.139	0.630554
Jinhua City	Zhejiang	351.783	39	29878.9	169237	29878.9					29324.7	1062.91	0.125817	0.122473	-2.65813	274.529	3.20243	440.221	89.8362	807.789	0.303893
Chongqing	Chongqing	1838	292	63643.4	367117	63636.2			7.2		57074.3	1560.45	0.122907	0.121585	-1.07619	900.859	18.7209	687.261	841.861	2448.7	2.27534

## Sheet:  cities_WWTPs inventory (2020)
city	province	effluent_I_B_BAU	relcaimed_water_BAU	wsi_BAU	wsi'_BAU	deltawsi_BAU	CI_construction_BAU	CI_wastewater_BAU	CI_relcaimed_water_BAU	CI_sludge_disposal_BAU	CI_total_BAU	CIWSA_BAU	effluent_I_B_WRE	relcaimed_water_WRE	wsi_WRE	wsi’_WRE	deltawsi_WRE	CI_construction_WRE	CI_wastewater_WRE	CI_relcaimed_water_WRE	CI_sludge_disposal_WRE	CI_total_WRE	CIWSA_WRE	effluent_I_B_WRE_LCR	relcaimed_water_WRE_LCR	wsi_WRE_LCR	wsi‘_WRE_LCR	deltawsi_WRE_LCR	CI_construction_WRE_LCR	CI_wastewater_WRE_LCR	CI_relcaimed_water_WRE_LCR	CI_sludge_disposal_WRE_LCR	CI_total_WRE_LCR	CIWSA_WRE_LCR
Bozhou City	Anhui	7868.43	282.865	0.0195466	0.0163425	-16.3921	56.7271	72.1245	0.637495	120.238	249.727	0.0152347	7868.43	282.865	0.0195466	0.0115422	-40.9503	56.7271	72.1245	1.84399	120.238	250.934	0.0061277	7868.43	282.865	0.0195466	0.0115422	-40.9503	56.7271	70.6958	1.25023	87.0846	215.758	0.0052687
Liuan City	Anhui	6954.19		0.005795	0.0052875	-8.75755	94.6939	72.8732	0.730992	118.031	286.329	0.0326934	6954.19		0.005795	0.0043884	-24.2726	94.6939	72.8732	2.11444	118.031	287.712	0.0118527	6954.19		0.005795	0.0043884	-24.2726	94.6939	71.4297	1.43359	85.4858	253.043	0.0104245
Hefei City	Anhui	29311	1102.27	0.109835	0.0997777	-9.15674	292.794	242.707	2.48267	524.201	1062.18	0.116	29311	1102.27	0.109835	0.0925604	-15.7278	292.794	242.707	7.18127	524.201	1066.88	0.0678342	29311	1102.27	0.109835	0.0925604	-15.7278	292.794	237.899	4.8689	379.662	915.224	0.0581915
Anqing City	Anhui	14216.7	0	0.0110808	0.0104537	-5.65934	43.5148	77.2689	1.05624	73.5162	195.356	0.0345185	14216.7	0	0.0110808	0.0095055	-14.2165	43.5148	77.2689	3.05525	73.5162	197.355	0.0138817	14216.7	0	0.0110808	0.0095055	-14.2165	43.5148	75.7383	2.07146	53.2454	174.57	0.0122791
Xuancheng City	Anhui	9949.14	9.50622	0.0032364	0.0028479	-12.0041	80.591	57.2502	1.2773	67.5918	206.71	0.0172203	9949.14	9.50622	0.0032364	0.0021604	-33.2468	80.591	57.2502	3.69467	67.5918	209.128	0.0062901	9949.14	9.50622	0.0032364	0.0021604	-33.2468	80.591	56.1161	2.50499	48.9545	188.167	0.0056596
Suzhou City	Anhui	8801.21	0	0.0280637	0.0243772	-13.1362	73.2884	75.4009	0.761252	80.8076	230.258	0.0175285	8801.21	0	0.0280637	0.019409	-30.8395	73.2884	75.4009	2.20197	80.8076	231.699	0.0075131	8801.21	0	0.0280637	0.019409	-30.8395	73.2884	73.9074	1.49293	58.5263	207.215	0.0067192
Chaohu City	Anhui	2743.3	0				55.6481	36.8704	0	72.5728	165.091		2743.3	0				55.6481	36.8704	0	72.5728	165.091		2743.3	0				55.6481	36.1401	0	52.5622	144.35
Chizhou City	Anhui	3856.31		0.0039202	0.0036877	-5.93082	27.3313	27.846	1.29102	19.4889	75.9572	0.0128052	3856.31		0.0039202	0.0032752	-16.4532	27.3313	27.846	3.73435	19.4889	78.4005	0.0047651	3856.31		0.0039202	0.0032752	-16.4532	27.3313	27.2944	2.53189	14.1152	71.2728	0.0043319
Huaibei City	Anhui	5297.23	6176.19	0.111212	0.09236	-16.9517	60.5034	78.9986	1.1906	70.4021	211.095	0.0124527	5297.23	6176.19	0.111212	0.0737816	-33.657	60.5034	78.9986	3.44387	70.4021	213.348	0.0063389	5297.23	6176.19	0.111212	0.0737816	-33.657	60.5034	77.4338	2.33494	50.99	191.262	0.0056827
Huainan City	Anhui	9864.55	0	0.128596	0.112852	-12.2428	54.2443	55.7535	0.896521	67.834	178.728	0.0145987	9864.55	0	0.128596	0.105029	-18.3266	54.2443	55.7535	2.59324	67.834	180.425	0.0098449	9864.55	0	0.128596	0.105029	-18.3266	54.2443	54.6491	1.75822	49.13	159.782	0.0087185
Chuzhou City	Anhui	13802	0	0.0144277	0.0126719	-12.1696	70.1096	97.2421	1.10831	141.457	309.917	0.0254664	13802	0	0.0144277	0.0100194	-30.5544	70.1096	97.2421	3.20584	141.457	312.014	0.0102117	13802	0	0.0144277	0.0100194	-30.5544	70.1096	95.316	2.17356	102.453	270.052	0.0088384
Wuhu City	Anhui	17159.4	0	0.0535132	0.0491936	-8.07203	88.3697	116.224	2.29554	147.617	354.506	0.0439178	17159.4	0	0.0535132	0.0450547	-15.8064	88.3697	116.224	6.63999	147.617	358.851	0.022703	17159.4	0	0.0535132	0.0450547	-15.8064	88.3697	113.922	4.50191	106.914	313.708	0.019847
Bengbu City	Anhui	8105.27	0	0.102407	0.094373	-7.84499	46.2539	112.042	1.29961	199.774	359.37	0.0458091	8105.27	0	0.102407	0.086431	-15.6003	46.2539	112.042	3.75921	199.774	361.829	0.0231938	8105.27	0	0.102407	0.086431	-15.6003	46.2539	109.823	2.54874	144.69	303.315	0.0194429
Tongling City	Anhui	5958.01	0	0.0879996	0.0796664	-9.46959	29.5757	36.5578	1.94896	29.8958	97.9783	0.0103466	5958.01	0	0.0879996	0.0739733	-15.939	29.5757	36.5578	5.63749	29.8958	101.667	0.0063785	5958.01	0	0.0879996	0.0739733	-15.939	29.5757	35.8336	3.82222	21.6526	90.8842	0.005702
Fuyang City	Anhui	13731.1	3087.93	0.0314375	0.0278683	-11.3533	74.2362	86.1685	0.547497	113.934	274.886	0.0242118	13731.1	3087.93	0.0314375	0.0236943	-24.6305	74.2362	86.1685	1.58367	113.934	275.922	0.0112025	13731.1	3087.93	0.0314375	0.0236943	-24.6305	74.2362	84.4616	1.07373	82.5186	242.29	0.009837
Maanshan City	Anhui	8598.76	0	0.0788641	0.0734939	-6.80944	63.7327	68.8202	2.06494	89.7845	224.402	0.0329545	8598.76	0	0.0788641	0.068908	-12.6244	63.7327	68.8202	5.97296	89.7845	228.31	0.018085	8598.76	0	0.0788641	0.068908	-12.6244	63.7327	67.457	4.04967	65.028	200.267	0.0158636
Huangshan City	Anhui	6118.68	0	0.0037843	0.0035796	-5.40919	39.0376	35.0185	1.31751	38.0546	113.428	0.0209771	6118.68	0	0.0037843	0.0032216	-14.8693	39.0376	35.0185	3.81098	38.0546	115.922	0.0077964	6118.68	0	0.0037843	0.0032216	-14.8693	39.0376	34.3248	2.58384	27.5617	103.508	0.0069615
Beijing	Beijing	77894.9	26436.4	2.71947	1.87122	-31.1918	650.548	849.175	1943.97	298.76	3742.46	0.119982	77894.9	26436.4	2.71947	1.84498	-32.1565	650.548	849.175	2485.86	298.76	4284.34	0.133234	77894.9	26436.4	2.71947	1.84498	-32.1565	650.548	807.288	1685.41	268.864	3412.11	0.10611
Sanming City	Fujian	8257.04	0	0.12993	0.129409	-0.401061	48.0565	40.516	0.316415	22.5201	111.409	0.277797	8257.04	0	0.12993	0.129223	-0.544292	48.0565	40.516	0.846997	22.5201	111.939	0.205662	8257.04	0	0.12993	0.129223	-0.544292	48.0565	39.6252	0.574264	17.2509	105.507	0.193844
Nanping City	Fujian	7976.86	9.76276	0.135975	0.135561	-0.304835	38.4324	37.2462	0.237072	23.2804	99.196	0.325381	7976.86	9.76276	0.135975	0.135424	-0.405809	38.4324	37.2462	0.634606	23.2804	99.5935	0.245418	7976.86	9.76276	0.135975	0.135424	-0.405809	38.4324	36.4273	0.430263	17.8333	93.1232	0.229473
Xiamen City	Fujian	0	327.861	0.59601	0.587204	-1.47753	97.7946	165.649	0.420685	168.767	432.631	0.292807	0	327.861	0.59601	0.572437	-3.95512	97.7946	165.649	1.12611	168.767	433.336	0.109563	0	327.861	0.59601	0.572437	-3.95512	97.7946	162.007	0.763503	129.279	389.844	0.0985667
Ningde City	Fujian	3143	0	0.143131	0.142599	-0.372106	38.9567	57.0971	0.242071	124.902	221.198	0.594468	3143	0	0.143131	0.142173	-0.669316	38.9567	57.0971	0.647988	124.902	221.604	0.331102	3143	0	0.143131	0.142173	-0.669316	38.9567	55.8418	0.439336	95.6777	190.916	0.28525
Quanzhou City	Fujian	11149.2	5252.87	0.463234	0.455962	-1.56985	173.785	201.374	0.337096	146.409	521.905	0.332455	11149.2	5252.87	0.463234	0.453299	-2.14475	173.785	201.374	0.902357	146.409	522.47	0.243604	11149.2	5252.87	0.463234	0.453299	-2.14475	173.785	196.946	0.611798	112.153	483.496	0.225432
Zhangzhou City	Fujian	12379.4	90.6656	0.230966	0.228312	-1.14917	92.0018	72.6539	0.25866	62.9616	227.876	0.198291	12379.4	90.6656	0.230966	0.227627	-1.44601	92.0018	72.6539	0.692395	62.9616	228.31	0.157885	12379.4	90.6656	0.230966	0.227627	-1.44601	92.0018	71.0565	0.469444	48.2301	211.758	0.146439
Fuzhou City	Fujian	22409.5	0	0.417365	0.40812	-2.21499	133.247	135.047	0.350306	114.333	382.977	0.172903	22409.5	0	0.417365	0.406666	-2.56327	133.247	135.047	0.937718	114.333	383.564	0.149639	22409.5	0	0.417365	0.406666	-2.56327	133.247	132.077	0.635773	87.5816	353.542	0.137927
Putian City	Fujian	10070.1	0	0.37374	0.363224	-2.81372	26.7781	50.8888	0.26938	46.1918	124.128	0.0441153	10070.1	0	0.37374	0.361667	-3.23051	26.7781	50.8888	0.72109	46.1918	124.58	0.0385634	10070.1	0	0.37374	0.361667	-3.23051	26.7781	49.77	0.488899	35.384	112.421	0.0347997
Longyan City	Fujian	3742.16	0	0.141025	0.140547	-0.338805	60.3968	59.8931	0.311225	36.0406	156.642	0.462316	3742.16	0	0.141025	0.140188	-0.593654	60.3968	59.8931	0.833105	36.0406	157.164	0.264747	3742.16	0	0.141025	0.140188	-0.593654	60.3968	58.5763	0.564845	27.608	147.146	0.247872
Linxia Hui A.P	Gansu	2162.11		1.60595	1.50761	-6.12367	23.8413	18.6328	0.81909	32.9963	76.2895	0.0124581	2162.11		1.60595	1.49568	-6.86653	23.8413	18.6328	2.18919	32.9963	77.6596	0.0113099	2162.11		1.60595	1.49568	-6.86653	23.8413	18.2709	1.48427	26.7408	70.3373	0.0102436
Lanzhou City	Gansu	14132.4	589.944	8.11319	4.50136	-44.518	139.831	160.9	4.43291	615.952	921.116	0.0206909	14132.4	589.944	8.11319	4.38031	-46.01	139.831	160.9	11.8479	615.952	928.531	0.020181	14132.4	589.944	8.11319	4.38031	-46.01	139.831	157.775	8.03285	499.18	804.818	0.0174922
Jiayuguan City	Gansu	0	3789.1	37.3048	36.1263	-3.15922	26.1047	47.3988	6.09521	116.328	195.927	0.0620177	0	3789.1	37.3048	34.1549	-8.44363	26.1047	47.3988	16.2907	116.328	206.122	0.0244116	0	3789.1	37.3048	34.1549	-8.44363	26.1047	46.4782	11.0451	94.2745	177.903	0.0210694
Tianshui City	Gansu	3801.91		0.856924	0.803186	-6.27101	58.5186	32.5191	1.30275	76.7895	169.13	0.0269701	3801.91		0.856924	0.791773	-7.60287	58.5186	32.5191	3.48186	76.7895	171.309	0.0225322	3801.91		0.856924	0.791773	-7.60287	58.5186	31.8876	2.3607	62.2317	154.999	0.0203868
Dingxi City	Gansu	1170.8		0.781447	0.76952	-1.52635	37.9842	11.6133	0.854882	45.2536	95.706	0.0627023	1170.8		0.781447	0.766405	-1.92485	37.9842	11.6133	2.28485	45.2536	97.1359	0.0504641	1170.8		0.781447	0.766405	-1.92485	37.9842	11.3877	1.54913	36.6744	87.5954	0.0455076
Pingliang City	Gansu	1476.08		0.789189	0.765348	-3.02094	41.201	15.1409	1.43868	24.1626	81.9431	0.0271251	1476.08		0.789189	0.758998	-3.82552	41.201	15.1409	3.84517	24.1626	84.3496	0.0220492	1476.08		0.789189	0.758998	-3.82552	41.201	14.8468	2.60703	19.5818	78.2366	0.0204512
Qingyang City	Gansu	2864.72	0	1.3644	1.27519	-6.53834	38.1565	13.0383	2.12931	51.8035	105.127	0.0160786	2864.72	0	1.3644	1.26827	-7.0453	38.1565	13.0383	5.69102	51.8035	108.689	0.0154273	2864.72	0	1.3644	1.26827	-7.0453	38.1565	12.785	3.85851	41.9825	96.7826	0.0137373
Zhangye City	Gansu	2796.22	0	1.06475	1.05481	-0.933553	30.5042	23.1321	2.38903	31.2624	87.2876	0.0935012	2796.22	0	1.06475	1.05312	-1.09237	30.5042	23.1321	6.38519	31.2624	91.2838	0.0835673	2796.22	0	1.06475	1.05312	-1.09237	30.5042	22.6828	4.32916	25.3356	82.8517	0.0758481
Wuwei City	Gansu	250.732	0	2.55653	2.54755	-0.351609	37.5907	19.7637	1.78423	77.7191	136.858	0.389249	250.732	0	2.55653	2.54289	-0.533926	37.5907	19.7637	4.76872	77.7191	139.842	0.261923	250.732	0	2.55653	2.54289	-0.533926	37.5907	19.3799	3.23319	62.985	123.189	0.230732
Gannan Zang A.P	Gansu	198.06	0	0.0241399	0.0240252	-0.475147	25.5675	4.68013	1.39977	4.79188	36.4393	0.0767404	198.06	0	0.0241399	0.0238461	-1.21707	25.5675	4.68013	3.74119	4.79188	38.7807	0.0318642	198.06	0	0.0241399	0.0238461	-1.21707	25.5675	4.58923	2.53653	3.88343	36.5767	0.0300533
Baiyin City	Gansu	0	0	9.13862	9.12724	-0.124592	31.0729	15.1405	1.97711	67.3319	115.522	0.927212	0	0	9.13862	9.10819	-0.333004	31.0729	15.1405	5.28425	67.3319	118.829	0.356844	0	0	9.13862	9.10819	-0.333004	31.0729	14.8464	3.58272	54.567	104.069	0.312519
Jiuquan City	Gansu	2314.64	177.39	1.78302	1.76523	-0.997522	32.8449	28.2957	3.80639	77.4479	142.395	0.142745	2314.64	177.39	1.78302	1.76253	-1.14906	32.8449	28.2957	10.1734	77.4479	148.762	0.12946	2314.64	177.39	1.78302	1.76253	-1.14906	32.8449	27.7462	6.89755	62.7652	130.254	0.113353
Jinchang City	Gansu	0	279.391	12.4682	12.4315	-0.294348	34.2161	19.7146	3.7145	51.9075	109.553	0.372185	0	279.391	12.4682	12.3701	-0.78672	34.2161	19.7146	9.92778	51.9075	115.766	0.147153	0	279.391	12.4682	12.3701	-0.78672	34.2161	19.3317	6.73103	42.0669	102.346	0.130094
Longnan City	Gansu	1465.08	0	0.104032	0.10302	-0.972584	38.3589	12.4191	0.947085	15.483	67.2081	0.0691038	1465.08	0	0.104032	0.102102	-1.85558	38.3589	12.4191	2.53128	15.483	68.7923	0.0370726	1465.08	0	0.104032	0.102102	-1.85558	38.3589	12.1779	1.71621	12.5477	64.8007	0.0349215
Dongguan City	Guangdong	77156.3	240.025	0.868165	0.644479	-25.7654	426.519	988.091	1.35672	426.286	1842.25	0.0715011	77156.3	240.025	0.868165	0.614176	-29.2558	426.519	988.091	4.91732	426.286	1845.81	0.0630922	77156.3	240.025	0.868165	0.614176	-29.2558	426.519	962.042	3.33394	327.979	1719.87	0.0587875
ZhongShan City	Guangdong	28043.3	12.7322	1.09966	0.928899	-15.5288	430.045	414.379	1.68711	240.568	1086.68	0.0699786	28043.3	12.7322	1.09966	0.907729	-17.4539	430.045	414.379	6.11479	240.568	1091.11	0.0625136	28043.3	12.7322	1.09966	0.907729	-17.4539	430.045	403.455	4.14583	185.09	1022.74	0.0585964
Yunfu City	Guangdong	7168.35	0	0.37981	0.374751	-1.33201	40.948	69.5202	0.521724	28.063	139.053	0.104394	7168.35	0	0.37981	0.373608	-1.633	40.948	69.5202	1.89095	28.063	140.422	0.0859906	7168.35	0	0.37981	0.373608	-1.633	40.948	67.6874	1.28206	21.5913	131.509	0.0805324
Foshan City	Guangdong	32494.9	1503.3	0.99264	0.904887	-8.84028	472.972	901.758	1.94313	619.675	1996.35	0.225824	32494.9	1503.3	0.99264	0.883353	-11.0097	472.972	901.758	7.0427	619.675	2001.45	0.181789	32494.9	1503.3	0.99264	0.883353	-11.0097	472.972	877.985	4.77495	476.771	1832.5	0.166444
Guangzhou City	Guangdong	80510.6	12181.6	1.01229	0.924987	-8.62421	454.086	839.101	2.44352	617.092	1912.72	0.221786	80510.6	12181.6	1.01229	0.916602	-9.45256	454.086	839.101	8.85633	617.092	1919.14	0.203029	80510.6	12181.6	1.01229	0.916602	-9.45256	454.086	816.98	6.00459	474.783	1751.85	0.185332
Huizhou City	Guangdong	34078	25.531	0.185502	0.179355	-3.31382	401.261	437.333	1.18833	203.112	1042.89	0.314714	34078	25.531	0.185502	0.176074	-5.08232	401.261	437.333	4.30701	203.112	1046.01	0.205814	34078	25.531	0.185502	0.176074	-5.08232	401.261	425.804	2.92015	156.272	986.257	0.194056
Jieyang City	Guangdong	11590	103.549	0.450573	0.4412	-2.08026	102.423	111.369	0.560785	29.5456	243.898	0.117245	11590	103.549	0.450573	0.439406	-2.47851	102.423	111.369	2.03252	29.5456	245.37	0.0989992	11590	103.549	0.450573	0.439406	-2.47851	102.423	108.433	1.37805	22.732	234.966	0.0948015
Meizhou City	Guangdong	9289.67	0	0.209546	0.207916	-0.777776	100.766	122.729	0.39751	20.0617	243.955	0.313665	9289.67	0	0.209546	0.207109	-1.16299	100.766	122.729	1.44074	20.0617	244.998	0.210665	9289.67	0	0.209546	0.207109	-1.16299	100.766	119.494	0.976824	15.4352	236.672	0.203506
Shantou City	Guangdong	1448.57	176.976	0.728963	0.717943	-1.51179	131.775	259.64	0.605228	175.935	567.954	0.375682	1448.57	176.976	0.728963	0.704185	-3.39913	131.775	259.64	2.1936	175.935	569.543	0.167556	1448.57	176.976	0.728963	0.704185	-3.39913	131.775	252.795	1.48726	135.362	521.419	0.153398
Shanwei City	Guangdong	598.56		0.250182	0.249477	-0.281835	52.5482	72.6257	0.453634	40.9007	166.528	0.590839	598.56		0.250182	0.248289	-0.75637	52.5482	72.6257	1.64416	40.9007	167.719	0.22174	598.56		0.250182	0.248289	-0.75637	52.5482	70.7111	1.11474	31.4685	155.843	0.206039
Jiangmen City	Guangdong	28582.5	342.686	0.284135	0.276353	-2.73901	271.702	372.79	0.890078	160.98	806.363	0.294399	28582.5	342.686	0.284135	0.273394	-3.78017	271.702	372.79	3.22602	160.98	808.698	0.213932	28582.5	342.686	0.284135	0.273394	-3.78017	271.702	362.962	2.18724	123.856	760.708	0.201237
Heyuan City	Guangdong	8240.26	3.93106	0.163078	0.161997	-0.662875	83.9343	93.497	0.473693	55.4316	233.337	0.352006	8240.26	3.93106	0.163078	0.161417	-1.01823	83.9343	93.497	1.71686	55.4316	234.58	0.230373	8240.26	3.93106	0.163078	0.161417	-1.01823	83.9343	91.0321	1.16403	42.6484	218.779	0.214855
Shenzhen City	Guangdong	84118.4	9569.95	1.3186	0.888507	-32.6175	548.611	1296.77	2.8346	1076.69	2924.91	0.089673	84118.4	9569.95	1.3186	0.841829	-36.1575	548.611	1296.77	10.2738	1076.69	2932.35	0.0810994	84118.4	9569.95	1.3186	0.841829	-36.1575	548.611	1262.59	6.96563	828.396	2646.56	0.0731952
Qingyuan City	Guangdong	10957.4	21.5484	0.0833814	0.0828565	-0.629517	138.785	158.857	0.599127	51.874	350.115	0.556156	10957.4	21.5484	0.0833814	0.0823181	-1.27522	138.785	158.857	2.17149	51.874	351.688	0.275788	10957.4	21.5484	0.0833814	0.0823181	-1.27522	138.785	154.669	1.47227	39.9113	334.838	0.262575
Zhanjiang City	Guangdong	5368.62	0	0.472792	0.468718	-0.861711	128.435	220.12	0.590892	179.895	529.042	0.61394	5368.62	0	0.472792	0.466126	-1.40994	128.435	220.12	2.14164	179.895	530.593	0.376322	5368.62	0	0.472792	0.466126	-1.40994	128.435	214.317	1.45203	138.409	482.614	0.342293
Chaozhou City	Guangdong	7619.73	10.849	0.401084	0.391345	-2.42832	41.9433	68.1905	0.609211	31.6582	142.401	0.0586419	7619.73	10.849	0.401084	0.3894	-2.91308	41.9433	68.1905	2.20803	31.6582	144	0.0494322	7619.73	10.849	0.401084	0.3894	-2.91308	41.9433	66.3928	1.49705	24.3574	134.19	0.0460648
Zhuhai City	Guangdong	12969.7	1187.38	0.387634	0.34951	-9.83507	211.864	279.984	2.2375	159.581	653.666	0.0664628	12969.7	1187.38	0.387634	0.332455	-14.2349	211.864	279.984	8.10965	159.581	659.538	0.0463326	12969.7	1187.38	0.387634	0.332455	-14.2349	211.864	272.603	5.49834	122.78	612.745	0.0430453
Zhaoqing City	Guangdong	13376.4	2234.1	0.170168	0.168348	-1.06947	176.732	197.609	0.873249	89.6134	464.828	0.434627	13376.4	2234.1	0.170168	0.167189	-1.75045	176.732	197.609	3.16502	89.6134	467.12	0.266859	13376.4	2234.1	0.170168	0.167189	-1.75045	176.732	192.4	2.14588	68.9475	440.225	0.251494
Maoming City	Guangdong	3451.06	0	0.448782	0.447154	-0.362849	123.693	97.5248	0.723503	54.9783	276.92	0.763169	3451.06	0	0.448782	0.446348	-0.542401	123.693	97.5248	2.62228	54.9783	278.819	0.514046	3451.06	0	0.448782	0.446348	-0.542401	123.693	94.9538	1.7779	42.2997	262.725	0.484374
Yangjiang City	Guangdong	9331.13	0	0.204873	0.202655	-1.08272	53.2963	100.022	0.89521	53.6493	207.863	0.191987	9331.13	0	0.204873	0.201713	-1.54251	53.2963	100.022	3.24462	53.6493	210.212	0.136282	9331.13	0	0.204873	0.201713	-1.54251	53.2963	97.385	2.19985	41.2771	194.158	0.125875
Shaoguan City	Guangdong	5614.56	31.7031	0.138086	0.137492	-0.430168	97.8447	130.572	0.706565	21.6272	250.751	0.582981	5614.56	31.7031	0.138086	0.136894	-0.862798	97.8447	130.572	2.56089	21.6272	252.605	0.292791	5614.56	31.7031	0.138086	0.136894	-0.862798	97.8447	127.13	1.73628	16.6397	243.351	0.282064
Beihai City	Guangxi	2095.43	34.2781	0.35764	0.355489	-0.601499	63.8291	53.9062	0.378853	112.251	230.365	0.382981	2095.43	34.2781	0.35764	0.351867	-1.61422	63.8291	53.9062	12.8787	112.251	242.865	0.150454	2095.43	34.2781	0.35764	0.351867	-1.61422	63.8291	52.0255	8.73174	70.1597	194.746	0.120645
Nanning	Guangxi	6130.05	6.93959	0.181569	0.180457	-0.61266	94.2013	38.0648	0.336461	43.8325	176.435	0.287978	6130.05	6.93959	0.181569	0.179542	-1.11655	94.2013	38.0648	11.4376	43.8325	187.536	0.167957	6130.05	6.93959	0.181569	0.179542	-1.11655	94.2013	36.7368	7.7547	27.3965	166.089	0.148749
Nanning City	Guangxi	11073.1	0	1.94259	1.92815	-0.742979	35.6589	13.2124	0.336461	31.35	80.5577	0.108427	11073.1	0	1.94259	1.92793	-0.754201	35.6589	13.2124	11.4376	31.35	91.6589	0.121529	11073.1	0	1.94259	1.92793	-0.754201	35.6589	12.7514	7.7547	19.5946	75.7596	0.100448
Liuzhou	Guangxi	4227.03	117.939	0.236499	0.235747	-0.317634	95.7787	43.5855	0.403683	43.2872	183.055	0.576333	4227.03	117.939	0.236499	0.234965	-0.648418	95.7787	43.5855	13.7227	43.2872	196.374	0.302867	4227.03	117.939	0.236499	0.234965	-0.648418	95.7787	42.065	9.30402	27.0556	174.203	0.268673
Liuzhou City	Guangxi	20487.5	0	0.090951	0.0902763	-0.741828	82.1023	152.124	0.403683	310.593	545.224	0.735019	20487.5	0	0.090951	0.088996	-2.14951	82.1023	152.124	13.7227	310.593	558.543	0.259846	20487.5	0	0.090951	0.088996	-2.14951	82.1023	146.817	9.30402	194.129	432.353	0.20114
Guilin City	Guangxi	11807.5	0	0.124363	0.124063	-0.241711	147.042	82.9013	0.269691	59.0706	289.284	1.19696	11807.5	0	0.124363	0.123661	-0.564555	147.042	82.9013	9.16785	59.0706	298.182	0.52815	11807.5	0	0.124363	0.123661	-0.564555	147.042	80.0091	6.2158	36.9207	270.188	0.478566
Wuzhou City	Guangxi	3976.18	5.17651	0.209644	0.209024	-0.296025	41.479	25.6236	0.247576	32.852	100.202	0.338474	3976.18	5.17651	0.209644	0.208564	-0.515444	41.479	25.6236	8.41608	32.852	108.371	0.210247	3976.18	5.17651	0.209644	0.208564	-0.515444	41.479	24.7297	5.7061	20.5334	92.4482	0.179356
Hechi City	Guangxi	3766.11	100.956	0.0649904	0.0649102	-0.123403	71.3638	33.6418	0.122341	75.9237	181.052	1.46638	3766.11	100.956	0.0649904	0.0646635	-0.502997	71.3638	33.6418	4.15885	75.9237	185.088	0.367952	3766.11	100.956	0.0649904	0.0646635	-0.502997	71.3638	32.4682	2.8197	47.4544	154.106	0.30636
Yulin City	Guangxi	3922.12	31.4207	0.286151	0.285201	-0.331818	54.3736	78.5861	0.174478	171.448	304.582	0.917945	3922.12	31.4207	0.286151	0.283643	-0.876356	54.3736	78.5861	5.93116	171.448	310.339	0.35413	3922.12	31.4207	0.286151	0.283643	-0.876356	54.3736	75.8445	4.02133	107.159	241.399	0.275462
Baise City	Guangxi	6958.41	154.325	0.148053	0.1475	-0.373987	100.86	56.4383	0.187637	36.0563	193.543	0.517556	6958.41	154.325	0.148053	0.146781	-0.859352	100.86	56.4383	6.3785	36.0563	199.733	0.232422	6958.41	154.325	0.148053	0.146781	-0.859352	100.86	54.4693	4.32462	22.5362	182.19	0.212008
Guigang City	Guangxi	4577.54	1.59412	0.411431	0.40948	-0.474368	73.2256	45.9549	0.138792	41.7433	161.062	0.339531	4577.54	1.59412	0.411431	0.408326	-0.754755	73.2256	45.9549	4.71808	41.7433	165.642	0.219468	4577.54	1.59412	0.411431	0.408326	-0.754755	73.2256	44.3516	3.19886	26.0907	146.867	0.194592
Hezhou City	Guangxi	2401.96	0	0.148617	0.148373	-0.164113	35.6693	22.3701	0.158939	13.1396	71.338	0.434763	2401.96	0	0.148617	0.148013	-0.406414	35.6693	22.3701	5.40294	13.1396	76.582	0.18846	2401.96	0	0.148617	0.148013	-0.406414	35.6693	21.5897	3.6632	8.2126	69.1348	0.170133
Qinzhou City	Guangxi	6109.15	23.2269	0.25762	0.255859	-0.683641	95.6783	38.8205	0.202702	74.8431	209.544	0.306518	6109.15	23.2269	0.25762	0.254807	-1.09203	95.6783	38.8205	6.89063	74.8431	216.232	0.198015	6109.15	23.2269	0.25762	0.254807	-1.09203	95.6783	37.4661	4.67185	46.7789	184.595	0.169043
Fangchenggang City	Guangxi	1882.84	0	0.104161	0.103899	-0.251054	35.6786	22.7305	0.466105	17.9439	76.8191	0.30596	1882.84	0	0.104161	0.103211	-0.91157	35.6786	22.7305	15.8447	17.9439	92.1978	0.10114	1882.84	0	0.104161	0.103211	-0.91157	35.6786	21.9375	10.7427	11.2155	79.5743	0.087292
Liupanshui City	Guizhou	5727.97	2269.32	0.129194	0.128348	-0.654908	86.1473	47.8507	2.93932	68.5594	205.497	0.313789	5727.97	2269.32	0.129194	0.127497	-1.31314	86.1473	47.8507	19.0553	68.5594	221.613	0.168765	5727.97	2269.32	0.129194	0.127497	-1.31314	86.1473	45.9393	12.9195	50.205	195.211	0.14866
Anshun City	Guizhou	4233.94	814.364	0.190257	0.188963	-0.680447	41.4611	29.6962	1.91149	44.8361	117.905	0.173272	4233.94	814.364	0.190257	0.188157	-1.10377	41.4611	29.6962	12.392	44.8361	128.386	0.116316	4233.94	814.364	0.190257	0.188157	-1.10377	41.4611	28.51	8.40181	32.8328	111.206	0.100751
Bijie City	Guizhou	3298.58	0	0.134734	0.134196	-0.399454	108.728	70.9931	1.57002	257.726	439.017	1.0991	3298.58	0	0.134734	0.133143	-1.1807	108.728	70.9931	10.1783	257.726	447.625	0.379132	3298.58	0	0.134734	0.133143	-1.1807	108.728	68.1573	6.90087	188.729	372.515	0.315515
Guiyang City	Guizhou	26697.8	0	0.249495	0.234547	-5.99131	233.902	275.099	4.44965	555.029	1068.48	0.178338	26697.8	0	0.249495	0.22427	-10.1106	233.902	275.099	28.8467	555.029	1092.88	0.108093	26697.8	0	0.249495	0.22427	-10.1106	233.902	264.11	19.5581	406.439	924.01	0.0913907
Zunyi City	Guizhou	13276.9	0	0.212989	0.210781	-1.03649	124.344	136.303	2.4806	222.064	485.191	0.468113	13276.9	0	0.212989	0.209046	-1.85108	124.344	136.303	16.0815	222.064	498.792	0.269459	13276.9	0	0.212989	0.209046	-1.85108	124.344	130.859	10.9033	162.614	428.719	0.231604
Tongren City	Guizhou	2362.36	0	0.157161	0.156775	-0.245608	69.6891	18.9304	1.74531	68.7677	159.132	0.647814	2362.36	0	0.157161	0.156457	-0.448202	69.6891	18.9304	11.3147	68.7677	168.702	0.376401	2362.36	0	0.157161	0.156457	-0.448202	69.6891	18.1742	7.67136	50.3575	145.892	0.325509
Southeast Guizhou Miao & Dong A.P	Guizhou	7746.85	0	0.0687499	0.0684736	-0.401891	149.524	61.6343	1.64636	118.517	331.322	0.824237	7746.85	0	0.0687499	0.0680393	-1.0336	149.524	61.6343	10.6732	118.517	340.349	0.329271	7746.85	0	0.0687499	0.0680393	-1.0336	149.524	59.1723	7.23645	86.7882	302.721	0.292868
South Guizhou Buyi & Miao A.P	Guizhou	3918.87	0	0.0759736	0.0757504	-0.293786	41.0519	54.7557	1.96962	111.903	209.68	0.713798	3918.87	0	0.0759736	0.0752736	-0.921373	41.0519	54.7557	12.7689	111.903	220.48	0.239296	3918.87	0	0.0759736	0.0752736	-0.921373	41.0519	52.5685	8.65729	81.945	184.223	0.199944
Southwest Guizhou Buyi & Miao A.P	Guizhou	3833.36	0	0.10469	0.104202	-0.466139	52.0457	34.6742	2.0103	77.7005	166.431	0.357064	3833.36	0	0.10469	0.103584	-1.05579	52.0457	34.6742	13.0326	77.7005	177.453	0.168076	3833.36	0	0.10469	0.103584	-1.05579	52.0457	33.2891	8.8361	56.8989	151.07	0.143087
Wanning City	Hainan	473.445	203.924				12.4964	10.535	1.77926	2.37789	27.1885		473.445	203.924				12.4964	10.535	7.75085	2.37789	33.1601		473.445	203.924				12.4964	9.83728	5.25508	1.62629	29.2151
Sanya City	Hainan	0	973.24	0.105538	0.102078	-3.27853	62.9528	55.0815	3.52883	31.0586	152.622	0.0465518	0	973.24	0.105538	0.090465	-14.2821	62.9528	55.0815	15.3724	31.0586	164.465	0.0115155	0	973.24	0.105538	0.090465	-14.2821	62.9528	51.4337	10.4224	21.2415	146.05	0.0102262
Sansha City	Hainan	0					15.9245	0.795294	0	0	16.7198		0					15.9245	0.795294	0	0	16.7198		0					15.9245	0.742626	0	0	16.6672
Dongfang City	Hainan	0					13.6575	0	2.08502	0.0938519	15.8364		0					13.6575	0	9.0828	0.0938519	22.8342		0					13.6575	0	6.15814	0.064187	19.8798
Lingao County	Hainan	763.11					1.05735	3.9345	1.9768	0	6.96866		763.11					1.05735	3.9345	8.61139	0	13.6032		763.11					1.05735	3.67394	5.83852	0	10.5698
Ledong Li Autonomous County	Hainan	588.973	0				3.94393	3.31277	1.3371	0.0470604	8.64087		588.973	0				3.94393	3.31277	5.82471	0.0470604	13.1285		588.973	0				3.94393	3.09338	3.94915	0.0321855	11.0186
Wuzhishan City	Hainan	393.119	0				8.80467	3.64945	1.27632	0	13.7304		393.119	0				8.80467	3.64945	5.55995	0	18.0141		393.119	0				8.80467	3.40776	3.76965	0	15.9821
Baoting Li & Miao Autonomous County	Hainan	277.198	0				4.2911	1.88122	1.55269	0.138384	7.86339		277.198	0				4.2911	1.88122	6.76385	0.138384	13.0746		277.198	0				4.2911	1.75664	4.58589	0.0946437	10.7283
Danzhou City	Hainan	1627.11					8.73023	10.8748	2.74766	1.43225	23.7849		1627.11					8.73023	10.8748	11.9694	1.43225	33.0067		1627.11					8.73023	10.1546	8.11524	0.979542	27.9796
Dingan County	Hainan	0					11.4547	0	1.55951	0.285052	13.2992		0					11.4547	0	6.79356	0.285052	18.5333		0					11.4547	0	4.60604	0.194952	16.2557
Tunchang County	Hainan	350.408	0				3.51042	2.0906	1.33523	0.48405	7.4203		350.408	0				3.51042	2.0906	5.81656	0.48405	11.9016		350.408	0				3.51042	1.95215	3.94363	0.331051	9.73724
Wenchang City	Hainan	1296.7	0				6.68228	9.83703	1.85199	1.18659	19.5579		1296.7	0				6.68228	9.83703	8.06767	1.18659	25.7736		1296.7	0				6.68228	9.18556	5.46988	0.811534	22.1493
Chartgjiang Li Autonomous County	Hainan	932.925	0				9.13651	7.49768	2.38269	0.395173	19.4121		932.925	0				9.13651	7.49768	10.3795	0.395173	27.4089		932.925	0				9.13651	7.00114	7.03731	0.270266	23.4452
Haikou City	Hainan	282.888	15.4139				99.0984	88.2658	3.17069	66.0614	256.596		282.888	15.4139				99.0984	88.2658	13.8122	66.0614	267.238		282.888	15.4139				99.0984	82.4203	9.36466	45.1806	236.064
Chengmai County	Hainan	0	35.5533				17.5873	7.55082	3.01195	1.85687	30.007		0	35.5533				17.5873	7.55082	13.1207	1.85687	40.1157		0	35.5533				17.5873	7.05077	8.89584	1.26995	34.8039
Qiongzhong Li & Miao Autonomous County	Hainan	309.333					3.07602	2.21711	1.33577	0.202158	6.83106		309.333					3.07602	2.21711	5.81892	0.202158	11.3142		309.333					3.07602	2.07028	3.94523	0.13826	9.22979
Qionghai City	Hainan	1474.61					0.352713	10.0629	2.41679	1.18054	14.0129		1474.61					0.352713	10.0629	10.5281	1.18054	22.1242		1474.61					0.352713	9.39645	7.13803	0.807396	17.6946
Baisha Li Autonomous County	Hainan	0					0.492551	1.63475	1.41381	0	3.54112		0					0.492551	1.63475	6.15888	0	8.28618		0					0.492551	1.52649	4.17572	0	6.19476
Lingshui Li Autonomous County	Hainan	0	0				5.50353	3.92135	2.16445	0.0505563	11.6399		0	0				5.50353	3.92135	9.4288	0.0505563	18.9042		0	0				5.50353	3.66166	6.39273	0.0345764	15.5925
Baoding City	Hebei	12018.4	1949.32	0.0924139	0.0547719	-40.732	559.525	324.332	2.63274	701.685	1588.17	0.0389908	12018.4	1949.32	0.0924139	0.0471565	-48.9725	559.525	324.332	3.24241	701.685	1588.78	0.0324424	12018.4	1949.32	0.0924139	0.0471565	-48.9725	559.525	321.713	2.19835	577.906	1461.34	0.02984
Tangshan City	Hebei	24218	10059.3	0.644177	0.524358	-18.6003	529.344	284.981	5.75881	801.919	1622	0.0872031	24218	10059.3	0.644177	0.51598	-19.9008	529.344	284.981	7.09239	801.919	1623.34	0.0815714	24218	10059.3	0.644177	0.51598	-19.9008	529.344	282.679	4.80864	660.458	1477.29	0.0742327
Langfang City	Hebei	12697.4	1479.98	0.39497	0.286125	-27.5579	248.531	129.736	6.33676	270.478	655.081	0.0237711	12697.4	1479.98	0.39497	0.276551	-29.9819	248.531	129.736	7.80417	270.478	656.548	0.0218981	12697.4	1479.98	0.39497	0.276551	-29.9819	248.531	128.688	5.29123	222.765	605.275	0.020188
Zhangjiakou City	Hebei	9302.22	568.72	0.12683	0.102688	-19.0354	249.792	118.72	2.26539	228.37	599.147	0.0314755	9302.22	568.72	0.12683	0.0987495	-22.1403	249.792	118.72	2.78998	228.37	599.672	0.0270851	9302.22	568.72	0.12683	0.0987495	-22.1403	249.792	117.761	1.89161	188.085	557.529	0.0251817
Chengde City	Hebei	4065.29	1442.99	0.0928781	0.0763679	-17.7762	214.36	94.27	2.82843	124.972	436.43	0.0245515	4065.29	1442.99	0.0928781	0.0730978	-21.2971	214.36	94.27	3.48341	124.972	437.085	0.0205234	4065.29	1442.99	0.0928781	0.0730978	-21.2971	214.36	93.5087	2.36175	102.926	413.157	0.0193998
Cangzhou City	Hebei	17353.6	2604.43	0.0710487	0.0439147	-38.1907	321.581	147.159	6.99214	200.236	675.969	0.0176998	17353.6	2604.43	0.0710487	0.0392736	-44.723	321.581	147.159	8.61131	200.236	677.588	0.0151508	17353.6	2604.43	0.0710487	0.0392736	-44.723	321.581	145.97	5.83847	164.914	638.304	0.0142724
Shyiazhuang City	Hebei	34638.1	13868.7	1.0139	0.743417	-26.6777	594.54	386.11	3.76448	949.254	1933.67	0.0724825	34638.1	13868.7	1.0139	0.73048	-27.9537	594.54	386.11	4.63622	949.254	1934.54	0.0692051	34638.1	13868.7	1.0139	0.73048	-27.9537	594.54	382.992	3.14336	781.803	1762.48	0.0630498
Qinhuangdao City	Hebei	5765.37	2382.25	0.500578	0.43877	-12.3472	174.495	146.628	3.89758	271.546	596.567	0.0483159	5765.37	2382.25	0.500578	0.430954	-13.9086	174.495	146.628	4.80015	271.546	597.469	0.0429569	5765.37	2382.25	0.500578	0.430954	-13.9086	174.495	145.444	3.2545	223.644	546.838	0.0393166
Hengshui City	Hebei	3937.94	1639.42	0.134413	0.0846343	-37.0343	220.368	106.389	3.55094	153.711	484.019	0.0130695	3937.94	1639.42	0.134413	0.0751084	-44.1213	220.368	106.389	4.37324	153.711	484.841	0.0109888	3937.94	1639.42	0.134413	0.0751084	-44.1213	220.368	105.53	2.96505	126.596	455.459	0.0103229
Xingtai City	Hebei	4895.89	2040.67	0.358709	0.285295	-20.4662	250.728	145.956	1.78175	206.517	604.983	0.0295601	4895.89	2040.67	0.358709	0.274023	-23.6087	250.728	145.956	2.19435	206.517	605.395	0.0256429	4895.89	2040.67	0.358709	0.274023	-23.6087	250.728	144.777	1.48777	170.086	567.08	0.02402
Handan City	Hebei	5292.73	12266.9	0.314724	0.227489	-27.7181	281.792	201.155	2.45711	312.445	797.848	0.0287843	5292.73	12266.9	0.314724	0.212522	-32.4737	281.792	201.155	3.0261	312.445	798.417	0.0245866	5292.73	12266.9	0.314724	0.212522	-32.4737	281.792	199.53	2.0517	257.329	740.702	0.0228093
Sanmenxia City	Henan	7707.42	66.024	0.313041	0.292457	-6.57538	39.6331	187.431	26.2288	127.884	381.177	0.0579702	7707.42	66.024	0.313041	0.287452	-8.17427	39.6331	187.431	49.9761	127.884	404.924	0.0495363	7707.42	66.024	0.313041	0.287452	-8.17427	39.6331	182.374	33.8838	97.955	353.846	0.0432877
Xinyang City	Henan	15179.8	0	0.307045	0.299814	-2.35497	63.4161	240.749	14.2056	165.728	484.099	0.205567	15179.8	0	0.307045	0.298529	-2.77337	63.4161	240.749	27.0672	165.728	496.961	0.179191	15179.8	0	0.307045	0.298529	-2.77337	63.4161	234.254	18.3516	126.943	442.965	0.159721
Nanyang City	Henan	17825.8	0	0.904615	0.860154	-4.91501	97.7156	368.11	13.4971	181.09	660.412	0.134366	17825.8	0	0.904615	0.856233	-5.34841	97.7156	368.11	25.7173	181.09	672.633	0.125763	17825.8	0	0.904615	0.856233	-5.34841	97.7156	358.179	17.4363	138.709	612.04	0.114434
Zhoukou City	Henan	18517.5	0	1.35595	1.22716	-9.49806	66.7493	307.237	11.1772	223.282	608.446	0.0640601	18517.5	0	1.35595	1.22079	-9.96828	66.7493	307.237	21.2969	223.282	618.565	0.0620537	18517.5	0	1.35595	1.22079	-9.96828	66.7493	298.948	14.4393	171.027	551.164	0.0552921
Shangqiu City	Henan	15250.4	986.445	1.2084	1.09588	-9.31165	97.7738	334.766	11.7481	221.807	666.095	0.0715336	15250.4	986.445	1.2084	1.08782	-9.97832	97.7738	334.766	22.3847	221.807	676.732	0.0678204	15250.4	986.445	1.2084	1.08782	-9.97832	97.7738	325.735	15.1768	169.898	608.583	0.0609907
Anyang City	Henan	3785.28	1847.35	2.52783	2.41297	-4.5439	73.5699	221.876	17.348	249.428	562.222	0.123731	3785.28	1847.35	2.52783	2.4027	-4.95025	73.5699	221.876	33.0547	249.428	577.929	0.116747	3785.28	1847.35	2.52783	2.4027	-4.95025	73.5699	215.89	22.4111	191.055	502.926	0.101596
Pingdingshan City	Henan	10210.3	486.181	1.55169	1.39176	-10.3071	58.2039	327.844	16.0083	186.341	588.397	0.0570867	10210.3	486.181	1.55169	1.37886	-11.1385	58.2039	327.844	30.5021	186.341	602.891	0.0541267	10210.3	486.181	1.55169	1.37886	-11.1385	58.2039	318.999	20.6804	142.731	540.615	0.0485357
Kaifeng City	Henan	15628.2	401.6	2.07771	1.76661	-14.9733	67.5124	299.094	16.6405	208.832	592.078	0.0395423	15628.2	401.6	2.07771	1.75486	-15.5389	67.5124	299.094	31.7066	208.832	607.144	0.0390726	15628.2	401.6	2.07771	1.75486	-15.5389	67.5124	291.025	21.4971	159.959	539.993	0.034751
Xinxiang City	Henan	16994.9	1443.62	1.98644	1.71541	-13.6441	113.587	420.061	16.176	334.019	883.842	0.0647786	16994.9	1443.62	1.98644	1.70178	-14.3302	113.587	420.061	30.8216	334.019	898.488	0.0626988	16994.9	1443.62	1.98644	1.70178	-14.3302	113.587	408.728	20.8971	255.848	799.06	0.0557604
Luoyang City	Henan	32520.8	4731.28	1.16805	0.967832	-17.1413	125.983	563.302	24.3498	463.69	1177.33	0.0686836	32520.8	4731.28	1.16805	0.955958	-18.1579	125.983	563.302	46.3958	463.69	1199.37	0.0660525	32520.8	4731.28	1.16805	0.955958	-18.1579	125.983	548.105	31.4564	355.173	1060.72	0.0584164
Luohe City	Henan	12125.3	764.274	0.998624	0.764536	-23.441	65.7704	280.731	17.894	196.057	560.452	0.023909	12125.3	764.274	0.998624	0.743604	-25.5371	65.7704	280.731	34.095	196.057	576.653	0.022581	12125.3	764.274	0.998624	0.743604	-25.5371	65.7704	273.157	23.1164	150.174	512.217	0.0200578
Puyang City	Henan	12020.6	551.781	4.69674	3.64182	-22.4607	95.437	252.664	17.3546	186.519	551.975	0.0245752	12020.6	551.781	4.69674	3.62203	-22.8819	95.437	252.664	33.0673	186.519	567.688	0.0248094	12020.6	551.781	4.69674	3.62203	-22.8819	95.437	245.847	22.4196	142.868	506.572	0.0221385
Jiaozuo City	Henan	20496.6	4073.93	1.94164	1.48403	-23.5682	255.102	838.332	25.7149	591.384	1710.53	0.072578	20496.6	4073.93	1.94164	1.44651	-25.5004	255.102	838.332	48.9969	591.384	1733.82	0.0679915	20496.6	4073.93	1.94164	1.44651	-25.5004	255.102	815.714	33.2199	452.982	1557.02	0.0610584
Xuchang City	Henan	14448.1	601.374	1.51597	1.26347	-16.6563	96.7835	310.125	23.629	206.059	636.596	0.0382195	14448.1	601.374	1.51597	1.24913	-17.6023	96.7835	310.125	45.0226	206.059	657.99	0.0373809	14448.1	601.374	1.51597	1.24913	-17.6023	96.7835	301.758	30.5253	157.835	586.901	0.0333423
Zhengzhou City	Henan	18605	9756.63	2.72316	2.23678	-17.8606	225.27	611.941	36.3555	446.419	1319.98	0.0739048	18605	9756.63	2.72316	2.213	-18.734	225.27	611.941	69.2715	446.419	1352.9	0.0722165	18605	9756.63	2.72316	2.213	-18.734	225.27	595.431	46.9661	341.944	1209.61	0.0645678
Zhumadian City	Henan	14755.6	2079.55	0.628545	0.588255	-6.41	79.748	273.01	12.7189	186.679	552.156	0.0861397	14755.6	2079.55	0.628545	0.583799	-7.11887	79.748	273.01	24.2346	186.679	563.672	0.0791799	14755.6	2079.55	0.628545	0.583799	-7.11887	79.748	265.644	16.431	142.991	504.814	0.070912
Hebi City	Henan	6198.83	91.2144	2.9751	2.31725	-22.1118	65.3712	135.677	21.0929	96.2468	318.388	0.014399	6198.83	91.2144	2.9751	2.29723	-22.7846	65.3712	135.677	40.1902	96.2468	337.486	0.014812	6198.83	91.2144	2.9751	2.29723	-22.7846	65.3712	132.017	27.2489	73.7221	298.359	0.0130947
Qitaihe City	Heilongjiang	0	0	0.08638	0.0862659	-0.132091	31.3109	42.1973	4.54369	28.5913	106.643	0.807571	0	0	0.08638	0.08305	-3.85506	31.3109	42.1973	132.642	28.5913	234.742	0.0608926	0	0	0.08638	0.08305	-3.85506	31.3109	39.7467	89.9315	20.4668	181.456	0.0470701
Yichun City	Heilongjiang	0		0.0069816	0.006966	-0.223444	60.8364	55.6744	3.73647	38.4363	158.684	0.711586	0		0.0069816	0.0065271	-6.50997	60.8364	55.6744	109.077	38.4363	264.024	0.0405568	0		0.0069816	0.0065271	-6.50997	60.8364	52.4412	73.9545	27.5142	214.746	0.0329872
Jiamusi City	Heilongjiang	7812.82	0	0.016576	0.0162731	-1.82734	90.4731	119.135	6.41915	57.5119	273.539	0.149678	7812.82	0	0.016576	0.0147974	-10.73	90.4731	119.135	187.392	57.5119	454.512	0.0423581	7812.82	0	0.016576	0.0147974	-10.73	90.4731	112.216	127.052	41.1694	370.911	0.0345669
Shuangyashan City	Heilongjiang	2788.51	0	0.0102577	0.0101669	-0.885189	44.8307	45.3587	5.35036	72.2576	167.798	0.18971	2788.51	0	0.0102577	0.0094897	-7.48706	44.8307	45.3587	156.191	72.2576	318.638	0.0425625	2788.51	0	0.0102577	0.0094897	-7.48706	44.8307	42.7246	105.898	51.7249	245.178	0.03275
Harbin City	Heilongjiang	23294.4	0	0.0441063	0.0430896	-2.30511	447.05	571.816	10.8045	650.217	1679.89	0.728783	23294.4	0	0.0441063	0.0398737	-9.59636	447.05	571.816	315.412	650.217	1984.5	0.206799	23294.4	0	0.0441063	0.0398737	-9.59636	447.05	538.609	213.85	465.452	1664.96	0.173501
Daxing'anling Prefecture	Heilongjiang	1000.18	0				29.5979	33.0373	5.09154	26.2441	93.9708		1000.18	0				29.5979	33.0373	148.636	26.2441	237.515		1000.18	0				29.5979	31.1187	100.775	18.7866	180.278
Daqing City	Heilongjiang	10457.1	406.086	0.207261	0.196383	-5.24822	235.151	201.537	20.1558	129.387	586.23	0.1117	10457.1	406.086	0.207261	0.190042	-8.3078	235.151	201.537	588.402	129.387	1154.48	0.138963	10457.1	406.086	0.207261	0.190042	-8.3078	235.151	189.833	398.937	92.6203	916.541	0.110323
Mudanjiang City	Heilongjiang	2785.16	0	0.0380388	0.0378758	-0.42851	117.647	169.092	8.20017	195.068	490.008	1.14388	2785.16	0	0.0380388	0.0366538	-3.64102	117.647	169.092	239.385	195.068	721.192	0.198073	2785.16	0	0.0380388	0.0366538	-3.64102	117.647	159.272	162.303	139.638	578.86	0.158982
Suihua City	Heilongjiang	9161.32	0	0.0115721	0.0113098	-2.26666	134.973	147.723	4.22739	205.335	492.259	0.217215	9161.32	0	0.0115721	0.0095328	-17.6226	134.973	147.723	123.409	205.335	611.44	0.0346963	9161.32	0	0.0115721	0.0095328	-17.6226	134.973	139.144	83.6711	146.987	504.776	0.0286436
Jixi City	Heilongjiang	761.34		0.0195923	0.0195122	-0.408834	77.8384	77.9259	5.16585	94.7584	255.689	0.624834	761.34		0.0195923	0.0182857	-6.66895	77.8384	77.9259	150.805	94.7584	401.328	0.060179	761.34		0.0195923	0.0182857	-6.66895	77.8384	73.4005	102.246	67.8319	321.317	0.0481813
Hegang City	Heilongjiang	3474.12	0	0.0149889	0.0147926	-1.30964	59.8759	62.4956	4.57261	44.0827	171.027	0.130556	3474.12	0	0.0149889	0.0136071	-9.21882	59.8759	62.4956	133.487	44.0827	299.941	0.0325342	3474.12	0	0.0149889	0.0136071	-9.21882	59.8759	58.8663	90.5039	31.5562	240.802	0.0261195
Heihe City	Heilongjiang	2388.29		0.0017465	0.0017222	-1.39135	100.995	67.5303	4.86438	84.9773	258.367	0.185852	2388.29		0.0017465	0.0011841	-32.2015	100.995	67.5303	142.004	84.9773	395.506	0.0122821	2388.29		0.0017465	0.0011841	-32.2015	100.995	63.6086	96.2788	60.8302	321.712	0.0099905
Qiqihar City	Heilongjiang	8010.35	0	0.0308406	0.0302339	-1.96721	138.043	151.798	4.47175	165.984	460.296	0.233986	8010.35	0	0.0308406	0.0281396	-8.75794	138.043	151.798	130.542	165.984	586.367	0.0669533	8010.35	0	0.0308406	0.0281396	-8.75794	138.043	142.982	88.5077	118.818	488.351	0.0557615
Shiyan City	Hubei	17824.4	7.78946	0.191918	0.186585	-2.77833	118.495	145.721	0.799804	164.112	429.128	0.154456	17824.4	7.78946	0.191918	0.181794	-5.27518	118.495	145.721	19.4792	164.112	447.808	0.0848899	17824.4	7.78946	0.191918	0.181794	-5.27518	118.495	143.479	13.2069	114.804	389.985	0.0739286
Xianning City	Hubei	6747.52	0	0.207794	0.206432	-0.655264	66.6842	55.2801	0.858139	45.5165	168.339	0.256892	6747.52	0	0.207794	0.205296	-1.20191	66.6842	55.2801	20.8999	45.5165	188.381	0.156736	6747.52	0	0.207794	0.205296	-1.20191	66.6842	54.4295	14.1702	31.8409	167.125	0.13905
Xiaogan City	Hubei	12117.6	1015.42	0.866925	0.843932	-2.65233	144.334	106.469	0.622761	110.905	362.331	0.136609	12117.6	1015.42	0.866925	0.838867	-3.23656	144.334	106.469	15.1673	110.905	376.876	0.116443	12117.6	1015.42	0.866925	0.838867	-3.23656	144.334	104.831	10.2835	77.5833	337.032	0.104133
Yichang City	Hubei	7843.57	0	0.212825	0.211079	-0.820487	142.542	154.028	1.71403	147.162	445.446	0.542912	7843.57	0	0.212825	0.207825	-2.34902	142.542	154.028	41.7451	147.162	485.478	0.206671	7843.57	0	0.212825	0.207825	-2.34902	142.542	151.658	28.3032	102.947	425.45	0.181117
Enshi Tujia & Miao A.P	Hubei	5280.21	1.37835	0.038074	0.037923	-0.396596	98.3549	54.9638	0	58.6982	212.017	0.534667	5280.21	1.37835	0.038074	0.0372024	-2.28923	98.3549	54.9638	0	58.6982	212.017	0.0926196	5280.21	1.37835	0.038074	0.0372024	-2.28923	98.3549	54.1181	0	41.0621	193.535	0.0845458
Wuhan City	Hubei	55310.6	444.48	0.774302	0.710217	-8.27655	580.328	499.993	2.16714	858.694	1941.18	0.23454	55310.6	444.48	0.774302	0.693979	-10.3736	580.328	499.993	52.7805	858.694	1991.8	0.192006	55310.6	444.48	0.774302	0.693979	-10.3736	580.328	492.3	35.7852	600.696	1709.11	0.164756
Administrative units directly under the Jurisdiction	Hubei	2726.53	0	0.49987	0.497578	-0.45852	92.3633	83.1047	0	48.7399	224.208	0.488999	2726.53	0	0.49987	0.494677	-1.03869	92.3633	83.1047	0	48.7399	224.208	0.215859	2726.53	0	0.49987	0.494677	-1.03869	92.3633	81.8261	0	34.0958	208.285	0.200529
Jingzhou City	Hubei	10966	0.455601	0.44977	0.445018	-1.05656	85.8215	122.258	0.580119	106.031	314.69	0.297844	10966	0.455601	0.44977	0.442492	-1.61812	85.8215	122.258	14.1288	106.031	328.239	0.202853	10966	0.455601	0.44977	0.442492	-1.61812	85.8215	120.377	9.57931	74.1738	289.951	0.179191
Jingmen City	Hubei	7549.8	0	0.767612	0.753892	-1.78736	52.2085	78.132	0.998949	74.8177	206.157	0.115342	7549.8	0	0.767612	0.749884	-2.30945	52.2085	78.132	24.3294	74.8177	229.488	0.0993689	7549.8	0	0.767612	0.749884	-2.30945	52.2085	76.9298	16.4953	52.3384	197.972	0.0857226
Xiangyang City	Hubei	10672.3	34.003	1.08475	1.05879	-2.39373	83.6018	102.997	1.25533	210.844	398.698	0.166559	10672.3	34.003	1.08475	1.05376	-2.85706	83.6018	102.997	30.5734	210.844	428.016	0.149807	10672.3	34.003	1.08475	1.05376	-2.85706	83.6018	101.412	20.7288	147.495	353.238	0.123634
Ezhou City	Hubei	501.737		1.26195	1.25676	-0.410872	29.8915	39.0568	1.43434	47.6658	118.048	0.287338	501.737		1.26195	1.25013	-0.936408	29.8915	39.0568	34.9334	47.6658	151.548	0.161838	501.737		1.26195	1.25013	-0.936408	29.8915	38.4558	23.6849	33.3444	125.377	0.13389
Suizhou City	Hubei	5030.78		0.556484	0.545741	-1.93048	23.5232	35.8292	0.747131	29.3173	89.4168	0.0463186	5030.78		0.556484	0.542761	-2.46613	23.5232	35.8292	18.1963	29.3173	106.866	0.0433337	5030.78		0.556484	0.542761	-2.46613	23.5232	35.2779	12.3371	20.5088	91.647	0.0371625
Huanggang City	Hubei	6178.96	49.7125	0.317473	0.315984	-0.46911	77.7176	89.0338	0.525738	69.4359	236.713	0.504616	6178.96	49.7125	0.317473	0.314562	-0.917148	77.7176	89.0338	12.8043	69.4359	248.992	0.271489	6178.96	49.7125	0.317473	0.314562	-0.917148	77.7176	87.6639	8.68135	48.5736	222.637	0.242752
Huangshi City	Hubei	11485.1	15.0066	0.664715	0.645327	-2.91673	68.7405	82.9814	1.04167	78.5751	231.339	0.0793143	11485.1	15.0066	0.664715	0.64075	-3.60531	68.7405	82.9814	25.3699	78.5751	255.667	0.0709141	11485.1	15.0066	0.664715	0.64075	-3.60531	68.7405	81.7047	17.2008	54.9669	222.613	0.0617459
Loudi City	Hunan	12294.8	53.5917	0.280663	0.276332	-1.54299	123.077	101.587	1.6063	164.862	391.132	0.253489	12294.8	53.5917	0.280663	0.274699	-2.12479	123.077	101.587	259.375	164.862	648.901	0.305395	12294.8	53.5917	0.280663	0.274699	-2.12479	123.077	97.2894	175.857	120.243	516.466	0.243066
Yueyang City	Hunan	12458.3	0	0.443067	0.43895	-0.929249	145.264	143.004	2.4701	239.58	530.318	0.570692	12458.3	0	0.443067	0.437584	-1.23767	145.264	143.004	398.858	239.58	926.706	0.748742	12458.3	0	0.443067	0.437584	-1.23767	145.264	136.955	270.426	174.738	727.383	0.587697
Changde City	Hunan	15315.1	51.016	0.4493	0.444271	-1.11947	102.806	140.925	2.22895	175.707	421.667	0.376668	15315.1	51.016	0.4493	0.44295	-1.41333	102.806	140.925	359.918	175.707	779.356	0.551432	15315.1	51.016	0.4493	0.44295	-1.41333	102.806	134.964	244.024	128.153	609.946	0.431567
Zhangjiajie City	Hunan	704.259	0	0.0804472	0.0803808	-0.0825386	35.8828	34.7223	1.41326	46.8281	118.847	1.44022	704.259	0	0.0804472	0.0798829	-0.701454	35.8828	34.7223	228.206	46.8281	345.639	0.49276	704.259	0	0.0804472	0.0798829	-0.701454	35.8828	33.2535	154.724	34.1543	258.014	0.367837
Huaihua City	Hunan	10674.9	0	0.106104	0.10562	-0.456064	108.209	97.6163	1.25165	102.917	309.995	0.679686	10674.9	0	0.106104	0.105088	-0.957272	108.209	97.6163	202.109	102.917	510.852	0.533653	10674.9	0	0.106104	0.105088	-0.957272	108.209	93.487	137.03	75.0631	413.789	0.432259
Zhuzhou City	Hunan	17512.6	0	0.219704	0.216466	-1.4738	262.796	212.453	2.81745	304.896	782.962	0.531255	17512.6	0	0.219704	0.214181	-2.51397	262.796	212.453	454.946	304.896	1235.09	0.491291	17512.6	0	0.219704	0.214181	-2.51397	262.796	203.466	308.453	222.377	997.092	0.396621
Yongzhou City	Hunan	7181.6	0	0.139143	0.138743	-0.287259	117.639	115.835	1.25943	145.529	380.262	1.32373	7181.6	0	0.139143	0.138154	-0.710852	117.639	115.835	203.365	145.529	582.368	0.819258	7181.6	0	0.139143	0.138154	-0.710852	117.639	110.935	137.881	106.142	472.598	0.664836
Xiangtan City	Hunan	16112.4	57.8674	0.584874	0.561785	-3.94766	100.474	162.177	2.90242	197.071	462.624	0.11719	16112.4	57.8674	0.584874	0.556691	-4.81866	100.474	162.177	468.666	197.071	928.387	0.192665	16112.4	57.8674	0.584874	0.556691	-4.81866	100.474	155.317	317.755	143.734	717.28	0.148855
West Hunan Tujia & Miao A.P	Hunan	4732.89	0	0.0813553	0.0810422	-0.384855	60.6278	70.6273	0	106.898	238.153	0.618761	4732.89	0	0.0813553	0.0803155	-1.2781	60.6278	70.6273	0	106.898	238.153	0.186328	4732.89	0	0.0813553	0.0803155	-1.2781	60.6278	67.6397	0	77.9662	206.234	0.161355
Yiyang City	Hunan	11880.9	0	0.301009	0.297471	-1.17545	70.4082	93.8359	1.47815	189.27	354.992	0.302005	11880.9	0	0.301009	0.296281	-1.57058	70.4082	93.8359	238.684	189.27	592.198	0.377058	11880.9	0	0.301009	0.296281	-1.57058	70.4082	89.8665	161.827	138.045	460.147	0.29298
Hengyang City	Hunan	8077.62	0	0.430784	0.427877	-0.674794	223.421	145.71	1.70687	232.154	602.992	0.893607	8077.62	0	0.430784	0.426319	-1.03634	223.421	145.71	275.615	232.154	876.9	0.846156	8077.62	0	0.430784	0.426319	-1.03634	223.421	139.546	186.867	169.322	719.157	0.693943
Shaoyang City	Hunan	10479.5	0	0.203295	0.20211	-0.583142	114.366	124.919	0.920051	270.77	510.975	0.876229	10479.5	0	0.203295	0.201221	-1.02009	114.366	124.919	148.565	270.77	658.62	0.645648	10479.5	0	0.203295	0.201221	-1.02009	114.366	119.635	100.727	197.487	532.215	0.521733
Chenzhou City	Hunan	13967	0	0.192013	0.190715	-0.676152	78.4729	103.042	2.04999	152.525	336.09	0.497053	13967	0	0.192013	0.190076	-1.00868	78.4729	103.042	331.021	152.525	665.061	0.659339	13967	0	0.192013	0.190076	-1.00868	78.4729	98.6833	224.432	111.245	512.833	0.508421
Changsha City	Hunan	54089.7	0	0.42366	0.403856	-4.67464	231.421	497.128	5.54466	1282.98	2017.08	0.431492	54089.7	0	0.42366	0.398349	-5.97436	231.421	497.128	895.32	1282.98	2906.85	0.486555	54089.7	0	0.42366	0.398349	-5.97436	231.421	476.099	607.027	935.749	2250.3	0.376659
Jilin City	Jilin	1188.7	0	0.0559161	0.0551343	-1.39817	167.572	301.658	5.62406	275.564	750.418	0.536713	1188.7	0	0.0559161	0.0486222	-13.0444	167.572	301.658	61.4129	275.564	806.207	0.0618048	1188.7	0	0.0559161	0.0486222	-13.0444	167.572	289.359	41.6379	242.347	740.917	0.0567996
Siping City	Jilin	516.181	0	0.106432	0.103673	-2.59236	72.3406	136.502	3.78247	55.4471	268.072	0.103407	516.181	0	0.106432	0.0833792	-21.6596	72.3406	136.502	41.3033	55.4471	305.593	0.0141089	516.181	0	0.106432	0.0833792	-21.6596	72.3406	130.936	28.0037	48.7635	280.044	0.0129294
Yanbian Korean A.P	Jilin	4914.07	0				117.475	205.792	4.02358	72.264	399.555		4914.07	0				117.475	205.792	43.9361	72.264	439.467		4914.07	0				117.475	197.401	29.7887	63.5534	408.219
Songyuan City	Jilin	6238.2		0.0571156	0.0537128	-5.95774	91.4448	105.039	5.90137	46.3732	248.758	0.0417539	6238.2		0.0571156	0.0451429	-20.9622	91.4448	105.039	64.4411	46.3732	307.298	0.0146596	6238.2		0.0571156	0.0451429	-20.9622	91.4448	100.756	43.691	40.7834	276.675	0.0131988
Baicheng City	Jilin	822.576	0	0.0126812	0.0124013	-2.2072	49.2937	53.4737	3.56754	20.8429	127.178	0.0576277	822.576	0	0.0126812	0.0100266	-20.9334	49.2937	53.4737	38.9564	20.8429	162.567	0.0077658	822.576	0	0.0126812	0.0100266	-20.9334	49.2937	51.2935	26.4124	18.3305	145.33	0.0069424
Baishan City	Jilin	3367.97	0	0.0134732	0.0132357	-1.76276	57.8943	71.2374	5.3292	31.5048	165.966	0.0941488	3367.97	0	0.0134732	0.0117175	-13.0311	57.8943	71.2374	58.1931	31.5048	218.829	0.0167932	3367.97	0	0.0134732	0.0117175	-13.0311	57.8943	68.333	39.4549	27.7072	193.389	0.0148409
Liaoyuan City	Jilin	3983.58	12.8332	0.0933215	0.0843416	-9.62254	49.8609	80.0154	6.00307	46.7481	182.627	0.0189792	3983.58	12.8332	0.0933215	0.0666151	-28.6176	49.8609	80.0154	65.5516	46.7481	242.176	0.0084625	3983.58	12.8332	0.0933215	0.0666151	-28.6176	49.8609	76.7531	44.444	41.1131	212.171	0.007414
Tonghua City	Jilin	5929.49	0	0.0274409	0.0266673	-2.81915	102.72	111.25	4.53036	59.7126	278.213	0.0986891	5929.49	0	0.0274409	0.0232825	-15.154	102.72	111.25	49.4701	59.7126	323.153	0.0213246	5929.49	0	0.0274409	0.0232825	-15.154	102.72	106.714	33.5407	52.5149	295.49	0.0194992
Changchun City	Jilin	8014.34	1679.44	0.15266	0.146047	-4.33153	301.476	386.06	7.35392	282.232	977.121	0.225585	8014.34	1679.44	0.15266	0.128535	-15.8029	301.476	386.06	80.3024	282.232	1050.07	0.0664477	8014.34	1679.44	0.15266	0.128535	-15.8029	301.476	370.32	54.4451	248.212	974.452	0.0616627
Nanjing City	Jiangsu	38056.8	9098.5	0.355486	0.323321	-9.04807	434.305	355.474	11.2929	176.036	977.109	0.107991	38056.8	9098.5	0.355486	0.320974	-9.70816	434.305	355.474	16.4781	176.036	982.294	0.101182	38056.8	9098.5	0.355486	0.320974	-9.70816	434.305	345.674	11.1722	151.382	942.533	0.0970868
Nantong City	Jiangsu	33011.4	1054.08	0.0430278	0.0366616	-14.7956	396.887	390.434	8.04992	235.595	1030.97	0.0696811	33011.4	1054.08	0.0430278	0.0347207	-19.3064	396.887	390.434	11.7461	235.595	1034.66	0.053592	33011.4	1054.08	0.0430278	0.0347207	-19.3064	396.887	379.67	7.96386	202.599	987.12	0.0511295
Suqian City	Jiangsu	17170.5	579.7	0.0480327	0.040698	-15.2702	150.814	134.398	4.19076	52.0854	341.488	0.0223629	17170.5	579.7	0.0480327	0.0388811	-19.0529	150.814	134.398	6.11499	52.0854	343.412	0.0180242	17170.5	579.7	0.0480327	0.0388811	-19.0529	150.814	130.693	4.14596	44.7907	330.443	0.0173435
Changzhou City	Jiangsu	10307.5	1939.95	0.0928153	0.0860385	-7.30138	271.047	214.114	10.7243	199.171	695.057	0.0951952	10307.5	1939.95	0.0928153	0.0841195	-9.36893	271.047	214.114	15.6484	199.171	699.981	0.0747135	10307.5	1939.95	0.0928153	0.0841195	-9.36893	271.047	208.21	10.6096	171.277	661.144	0.0705683
Xuzhou City	Jiangsu	25926.8	2593.08	0.0922993	0.0796586	-13.6953	264.263	312.308	5.87823	122.015	704.465	0.0514385	25926.8	2593.08	0.0922993	0.0768491	-16.7392	264.263	312.308	8.57727	122.015	707.164	0.042246	25926.8	2593.08	0.0922993	0.0768491	-16.7392	264.263	303.698	5.81539	104.927	678.703	0.0405457
Yangzhou City	Jiangsu	20481.4	1579.08	0.057768	0.0505494	-12.4958	204.212	233.54	8.56701	94.1615	540.48	0.0432524	20481.4	1579.08	0.057768	0.0486051	-15.8615	204.212	233.54	12.5006	94.1615	544.414	0.0343226	20481.4	1579.08	0.057768	0.0486051	-15.8615	204.212	227.101	8.47543	80.9739	520.763	0.0328315
Wuxi City	Jiangsu	73231.7	5488.97	0.113408	0.0876197	-22.7395	652.718	617.676	12.5129	416.25	1699.16	0.0747225	73231.7	5488.97	0.113408	0.0834943	-26.3772	652.718	617.676	18.2584	416.25	1704.9	0.0646356	73231.7	5488.97	0.113408	0.0834943	-26.3772	652.718	600.646	12.3792	357.953	1623.7	0.061557
Taizhou City	Jiangsu	10787.4	265.009	0.0348197	0.0316982	-8.96475	207.918	114.398	7.59532	18.3052	348.217	0.0388421	10787.4	265.009	0.0348197	0.0307142	-11.7907	207.918	114.398	11.0828	18.3052	351.704	0.029829	10787.4	265.009	0.0348197	0.0307142	-11.7907	207.918	111.244	7.51412	15.7416	342.418	0.0290414
Huai'an City	Jiangsu	14729.4	22.4626	0.0349276	0.0320125	-8.34612	161.559	158.651	5.39553	65.4257	391.032	0.0468517	14729.4	22.4626	0.0349276	0.0310901	-10.987	161.559	158.651	7.87294	65.4257	393.509	0.0358155	14729.4	22.4626	0.0349276	0.0310901	-10.987	161.559	154.277	5.33786	56.2627	377.437	0.0343527
Yancheng City	Jiangsu	12935.1	28.6284	0.0114175	0.0098981	-13.3076	244.169	171.348	5.57128	53.8398	474.928	0.0356889	12935.1	28.6284	0.0114175	0.0092751	-18.7642	244.169	171.348	8.12938	53.8398	477.486	0.0254475	12935.1	28.6284	0.0114175	0.0092751	-18.7642	244.169	166.624	5.51172	46.2994	462.604	0.0246544
Suzhou City	Jiangsu	113671	5273.41	0.131542	0.102936	-21.7471	1200	978.807	13.0638	593.314	2753.37	0.126608	113671	5273.41	0.131542	0.0987324	-24.9425	1200	978.807	19.0621	593.314	2759.37	0.110629	113671	5273.41	0.131542	0.0987324	-24.9425	1200	951.821	12.9241	510.219	2643.15	0.10597
Lianyungang City	Jiangsu	11393.6	19.1831	0.0809467	0.0725943	-10.3184	123.702	116.154	4.62682	29.0414	273.524	0.0265083	11393.6	19.1831	0.0809467	0.070772	-12.5696	123.702	116.154	6.75127	29.0414	275.649	0.0219296	11393.6	19.1831	0.0809467	0.070772	-12.5696	123.702	112.952	4.57736	24.9741	266.205	0.0211783
Zhenjiang City	Jiangsu	15735.6	651.676	0.0655368	0.0592745	-9.55539	199.092	157.719	10.5456	57.384	424.74	0.0444504	15735.6	651.676	0.0655368	0.0577687	-11.853	199.092	157.719	15.3877	57.384	429.582	0.0362425	15735.6	651.676	0.0655368	0.0577687	-11.853	199.092	153.371	10.4328	49.3473	412.243	0.0347796
Shangrao City	Jiangxi	12669.6	0	0.0016676	0.0016402	-1.64308	128.661	137.864	2.68607	188.567	457.778	0.279423	12669.6	0	0.0016676	0.001507	-9.63061	128.661	137.864	19.2828	188.567	474.375	0.0492777	12669.6	0	0.0016676	0.001507	-9.63061	128.661	129.692	13.0737	133.687	405.114	0.0420829
Jiujiang City	Jiangxi	13523.5	323.96	0.0061931	0.0060992	-1.5162	120.609	164.899	4.30776	195.191	485.007	0.320103	13523.5	323.96	0.0061931	0.0057917	-6.48141	120.609	164.899	30.9246	195.191	511.624	0.0789521	13523.5	323.96	0.0061931	0.0057917	-6.48141	120.609	155.124	20.9669	138.384	435.083	0.0671407
Nanchang City	Jiangxi	19975.3	0	0.0610811	0.0596374	-2.36358	154.205	245.818	8.2741	483.82	892.117	0.37744	19975.3	0	0.0610811	0.0587134	-3.87632	154.205	245.818	59.3983	483.82	943.241	0.243335	19975.3	0	0.0610811	0.0587134	-3.87632	154.205	231.246	40.272	343.012	768.734	0.198316
Jian City	Jiangxi	7859.23		0.0019445	0.0019208	-1.21882	56.2353	90.2632	2.96249	115.617	265.078	0.21692	7859.23		0.0019445	0.0018074	-7.05066	56.2353	90.2632	21.2672	115.617	283.383	0.040187	7859.23		0.0019445	0.0018074	-7.05066	56.2353	84.9125	14.4192	81.9687	237.536	0.0336853
Yichun City	Jiangxi	8086.71	0	0.0028374	0.0027896	-1.68464	87.2565	147.942	3.21209	168.12	406.531	0.240942	8086.71	0	0.0028374	0.0025567	-9.89286	87.2565	147.942	23.059	168.12	426.378	0.0430975	8086.71	0	0.0028374	0.0025567	-9.89286	87.2565	139.172	15.634	119.191	361.254	0.0365149
Fuzhou City	Jiangxi	3760.11	0	0.0028018	0.0027755	-0.938682	84.2012	103.564	3.02432	186.986	377.776	0.403053	3760.11	0	0.0028018	0.0026377	-5.85695	84.2012	103.564	21.711	186.986	396.462	0.0676998	3760.11	0	0.0028018	0.0026377	-5.85695	84.2012	97.4248	14.7201	132.567	328.913	0.056165
Xinyu City	Jiangxi	7208.46	0	0.019865	0.0193358	-2.66398	32.3053	83.5044	8.87111	111.244	235.925	0.0885657	7208.46	0	0.019865	0.0185164	-6.78882	32.3053	83.5044	63.6841	111.244	290.738	0.0428248	7208.46	0	0.019865	0.0185164	-6.78882	32.3053	78.5544	43.1778	78.8681	232.906	0.0343063
Jingdezhen City	Jiangxi	0	388.485	0.0092144	0.0091725	-0.454723	30.9593	59.7437	5.14859	81.8458	177.697	0.390277	0	388.485	0.0092144	0.0089132	-3.2688	30.9593	59.7437	36.9608	81.8458	209.51	0.0640967	0	388.485	0.0092144	0.0089132	-3.2688	30.9593	56.2022	25.0594	58.0258	170.247	0.0520847
Pingxiang City	Jiangxi	6322	50.0437	0.0156436	0.0153455	-1.90557	34.735	49.805	5.24858	48.9839	138.773	0.0728138	6322	50.0437	0.0156436	0.0149326	-4.54499	34.735	49.805	37.6786	48.9839	171.203	0.0376697	6322	50.0437	0.0156436	0.0149326	-4.54499	34.735	46.8526	25.5461	34.7279	141.862	0.0312138
Ganzhou City	Jiangxi	11825.6	8.20475	0.0044328	0.004396	-0.830175	109.288	145.465	2.52414	203.969	461.246	0.555329	11825.6	8.20475	0.0044328	0.0042563	-3.98168	109.288	145.465	18.1203	203.969	476.842	0.119742	11825.6	8.20475	0.0044328	0.0042563	-3.98168	109.288	136.842	12.2856	144.607	403.022	0.101205
Yingtan City	Jiangxi	4749.59		0.0048133	0.0047207	-1.92384	28.7633	51.6392	6.05932	25.7068	112.169	0.0582573	4749.59		0.0048133	0.0043975	-8.63856	28.7633	51.6392	43.4988	25.7068	149.608	0.0173168	4749.59		0.0048133	0.0043975	-8.63856	28.7633	48.5781	29.4922	18.2252	125.059	0.0144753
Dandong City	Liaoning	6534.68	0	0.0187138	0.0167699	-10.3875	59.132	33.7182	0.19216	123.069	216.112	0.0208054	6534.68	0	0.0187138	0.0145579	-22.2077	59.132	33.7182	0.447194	123.069	216.367	0.0097429	6534.68	0	0.0187138	0.0145579	-22.2077	59.132	33.0451	0.303198	90.3917	182.872	0.0082347
Dalian City	Liaoning	2775.84	16316.3	0.43839	0.386413	-11.8564	243.297	222.736	0.520653	728.51	1195.06	0.100795	2775.84	16316.3	0.43839	0.331248	-24.4399	243.297	222.736	1.21166	728.51	1195.75	0.0489264	2775.84	16316.3	0.43839	0.331248	-24.4399	243.297	218.29	0.821506	535.074	997.482	0.0408137
Fushun City	Liaoning	14627.6		0.12126	0.103372	-14.7515	42.3416	89.6148	0.275643	301.184	433.416	0.0293812	14627.6		0.12126	0.0909262	-25.0153	42.3416	89.6148	0.641475	301.184	433.782	0.0173407	14627.6		0.12126	0.0909262	-25.0153	42.3416	87.826	0.43492	221.213	351.815	0.014064
Chaoyang City	Liaoning	5312.41	2300.81	0.109522	0.0804435	-26.5504	79.2209	55.8678	0.135721	335.907	471.131	0.0177448	5312.41	2300.81	0.109522	0.054323	-50.3999	79.2209	55.8678	0.315849	335.907	471.312	0.0093514	5312.41	2300.81	0.109522	0.054323	-50.3999	79.2209	54.7526	0.214146	246.716	380.904	0.0075576
Benxi City	Liaoning	10933	0	0.147875	0.133609	-9.64747	41.6322	63.3227	0.318257	30.3544	135.628	0.0140583	10933	0	0.147875	0.124886	-15.5463	41.6322	63.3227	0.740646	30.3544	136.05	0.0087513	10933	0	0.147875	0.124886	-15.5463	41.6322	62.0587	0.502158	22.2947	126.488	0.0081362
Shenyang City	Liaoning	2916.69	1817.23	0.537443	0.507938	-5.48998	264.145	136.755	0.413171	734.726	1136.04	0.206929	2916.69	1817.23	0.537443	0.482269	-10.2661	264.145	136.755	0.961528	734.726	1136.59	0.110712	2916.69	1817.23	0.537443	0.482269	-10.2661	264.145	134.025	0.651916	539.64	938.462	0.0914134
Panjin City	Liaoning	9008.7		0.555556	0.304433	-45.2022	67.8819	49.2672	0.410903	141.872	259.432	0.0057394	9008.7		0.555556	0.245523	-55.8059	67.8819	49.2672	0.956251	141.872	259.977	0.0046586	9008.7		0.555556	0.245523	-55.8059	67.8819	48.2837	0.648338	104.202	221.016	0.0039604
Yingkou City	Liaoning	4849.18	522.257	0.134416	0.112335	-16.4277	139.658	43.768	0.291298	147.161	330.878	0.0201415	4849.18	522.257	0.134416	0.0949194	-29.3839	139.658	43.768	0.677907	147.161	331.265	0.0112737	4849.18	522.257	0.134416	0.0949194	-29.3839	139.658	42.8944	0.459621	108.087	291.098	0.0099068
Huludao City	Liaoning	8578.07	920.914	0.0961104	0.0747794	-22.1943	66.8294	41.3977	0.132541	58.2102	166.57	0.0075051	8578.07	920.914	0.0961104	0.0599813	-37.5912	66.8294	41.3977	0.308449	58.2102	166.746	0.0044358	8578.07	920.914	0.0961104	0.0599813	-37.5912	66.8294	40.5714	0.209128	42.7541	150.364	0.004
Liaoyang City	Liaoning	1939.43	172.125	0.153429	0.13589	-11.4315	53.9148	55.3858	0.261893	250.268	359.83	0.0314772	1939.43	172.125	0.153429	0.117213	-23.6046	53.9148	55.3858	0.609476	250.268	360.178	0.0152588	1939.43	172.125	0.153429	0.117213	-23.6046	53.9148	54.2803	0.413225	183.816	292.424	0.0123885
Tieling City	Liaoning	9771.43	1077.62	0.0359204	0.0241347	-32.8106	53.3324	59.2195	0.131172	197.764	310.447	0.0094618	9771.43	1077.62	0.0359204	0.0118352	-67.0516	53.3324	59.2195	0.305263	197.764	310.622	0.0046326	9771.43	1077.62	0.0359204	0.0118352	-67.0516	53.3324	58.0374	0.206969	145.254	256.83	0.0038303
Jinzhou City	Liaoning	17204.1	509.13	0.342494	0.232643	-32.0737	87.7501	86.453	0.203248	242.858	417.264	0.0130095	17204.1	509.13	0.342494	0.197299	-42.3934	87.7501	86.453	0.472997	242.858	417.534	0.009849	17204.1	509.13	0.342494	0.197299	-42.3934	87.7501	84.7273	0.320692	178.374	351.171	0.0082836
Fuxin City	Liaoning	9480.39	0	0.203535	0.146639	-27.9541	79.138	49.7378	0.138727	248.841	377.856	0.013517	9480.39	0	0.203535	0.119464	-41.3055	79.138	49.7378	0.322845	248.841	378.04	0.0091523	9480.39	0	0.203535	0.119464	-41.3055	79.138	48.745	0.218889	182.768	310.87	0.0075261
Anshan City	Liaoning	11883.1	0	0.216901	0.193922	-10.5943	137.706	77.4573	0.304399	341.318	556.785	0.0525554	11883.1	0	0.216901	0.181847	-16.1613	137.706	77.4573	0.708395	341.318	557.189	0.0344767	11883.1	0	0.216901	0.181847	-16.1613	137.706	75.9111	0.480292	250.69	464.787	0.0287592
Ulanqab City	Inner Mongolia	0	823.985	1.27441	1.26052	-1.08984	107.703	126.145	15.1946	71.0756	320.119	0.29374	0	823.985	1.27441	1.255	-1.52321	107.703	126.145	21.2372	71.0756	326.161	0.214128	0	823.985	1.27441	1.255	-1.52321	107.703	123.347	14.3988	58.2285	303.678	0.199368
Wuhai City	Inner Mongolia	553.586	733.972	11.5432	9.47213	-17.942	28.9172	92.4668	35.4618	65.9331	222.779	0.0124166	553.586	733.972	11.5432	9.38432	-18.7027	28.9172	92.4668	49.5643	65.9331	236.881	0.0126656	553.586	733.972	11.5432	9.38432	-18.7027	28.9172	90.4157	33.6046	54.0155	206.953	0.0110654
Xingan League	Inner Mongolia	3867.26	855.857	0.367558	0.363462	-1.11427	73.6789	94.6091	11.0357	19.8216	199.145	0.178724	3867.26	855.857	0.367558	0.362885	-1.27131	73.6789	94.6091	15.4244	19.8216	203.534	0.1601	3867.26	855.857	0.367558	0.362885	-1.27131	73.6789	92.5105	10.4577	16.2388	192.886	0.151724
Baotou City	Inner Mongolia	17750.1	7207.01	2.49288	1.83718	-26.3027	259.263	514.139	46.4944	393.381	1213.28	0.0461275	17750.1	7207.01	2.49288	1.81438	-27.2173	259.263	514.139	64.9843	393.381	1231.77	0.0452567	17750.1	7207.01	2.49288	1.81438	-27.2173	259.263	502.735	44.0594	322.276	1128.33	0.0414564
Hulunbuir City	Inner Mongolia	2721.59	1440.7	0.0582527	0.0575777	-1.15874	234.194	268.332	22.1941	119.747	644.467	0.556149	2721.59	1440.7	0.0582527	0.0573272	-1.58877	234.194	268.332	31.0203	119.747	653.293	0.41118	2721.59	1440.7	0.0582527	0.0573272	-1.58877	234.194	262.38	21.0317	98.1023	615.707	0.387524
Hohhot City	Inner Mongolia	1482.81	803.411	1.67723	1.61574	-3.66605	202.285	349.222	35.6801	110.749	697.935	0.190378	1482.81	803.411	1.67723	1.60262	-4.44841	202.285	349.222	49.8695	110.749	712.124	0.160086	1482.81	803.411	1.67723	1.60262	-4.44841	202.285	341.475	33.8115	90.7305	668.302	0.150235
Bayannur City	Inner Mongolia	362.892	878.41	16.6226	16.4618	-0.967419	119.823	168.737	18.6279	128.051	435.24	0.449886	362.892	878.41	16.6226	16.4498	-1.03955	119.823	168.737	26.0359	128.051	442.647	0.425802	362.892	878.41	16.6226	16.4498	-1.03955	119.823	164.994	17.6523	104.906	407.375	0.391872
Chifeng City	Inner Mongolia	5474.49	1165.28	1.17094	1.12786	-3.67867	201.064	439.596	15.2115	259.265	915.137	0.248767	5474.49	1165.28	1.17094	1.12168	-4.20713	201.064	439.596	21.2608	259.265	921.186	0.218957	5474.49	1165.28	1.17094	1.12168	-4.20713	201.064	429.845	14.4148	212.402	857.726	0.203873
Tongliao City	Inner Mongolia	8083.21	187.474	1.03133	0.999844	-3.05336	116.29	307.609	21.1419	197.66	642.701	0.210488	8083.21	187.474	1.03133	0.996922	-3.33664	116.29	307.609	29.5496	197.66	651.109	0.195137	8083.21	187.474	1.03133	0.996922	-3.33664	116.29	300.786	20.0346	161.932	599.043	0.179533
Erdos City	Inner Mongolia	1597.81	8558.37	1.65133	1.62766	-1.43387	332.896	205.483	72.8294	220.325	831.533	0.579921	1597.81	8558.37	1.65133	1.62397	-1.6569	332.896	205.483	101.792	220.325	860.496	0.519351	1597.81	8558.37	1.65133	1.62397	-1.6569	332.896	200.925	69.0152	180.5	783.337	0.472782
Xilingol League	Inner Mongolia	222.472	416.743	0.25915	0.256634	-0.970983	115.152	78.1191	33.7582	36.9896	264.018	0.271905	222.472	416.743	0.25915	0.255715	-1.32541	115.152	78.1191	47.1832	36.9896	277.443	0.209324	222.472	416.743	0.25915	0.255715	-1.32541	115.152	76.3863	31.9902	30.3036	253.832	0.19151
Alxa League	Inner Mongolia	0	637.747	3.99845	3.98994	-0.212857	80.377	36.43	46.8227	9.09647	172.726	0.811504	0	637.747	3.99845	3.98656	-0.29749	80.377	36.43	65.4432	9.09647	191.347	0.643207	0	637.747	3.99845	3.98656	-0.29749	80.377	35.6219	44.3705	7.45226	167.822	0.564128
Wuzhong City	Ningxia	1292.15	508.176	19.7956	17.7327	-10.421	67.1118	20.3396	0.0204701	70.2046	157.676	0.0151307	1292.15	508.176	19.7956	17.6594	-10.7911	67.1118	20.3396	0.0844034	70.2046	157.74	0.0146176	1292.15	508.176	19.7956	17.6594	-10.7911	67.1118	19.866	0.0572255	59.5054	146.541	0.0135797
Guyuan City	Ningxia	122.18	58.5577	0.642911	0.639454	-0.537711	26.7369	4.56668	0.0122663	18.6656	49.9815	0.0929521	122.18	58.5577	0.642911	0.634521	-1.30492	26.7369	4.56668	0.0505773	18.6656	50.0198	0.0383317	122.18	58.5577	0.642911	0.634521	-1.30492	26.7369	4.46035	0.0342914	15.8209	47.0525	0.0360578
Shizuishan City	Ningxia	1226.72	678.143	11.8253	10.6434	-9.99438	72.1558	16.5447	0.0426282	21.254	109.997	0.0110059	1226.72	678.143	11.8253	10.5835	-10.501	72.1558	16.5447	0.175767	21.254	110.13	0.0104876	1226.72	678.143	11.8253	10.5835	-10.501	72.1558	16.1594	0.11917	18.0149	106.449	0.0101371
Yinchuan City	Ningxia	8092.04	572.553	15.6481	9.63158	-38.4489	125.147	81.4293	0.0479694	192.282	398.907	0.010375	8092.04	572.553	15.6481	9.45837	-39.5557	125.147	81.4293	0.19779	192.282	399.056	0.0100885	8092.04	572.553	15.6481	9.45837	-39.5557	125.147	79.5334	0.134102	162.978	367.793	0.0092981
Haidong City	Qinghai	1257.74		0.863874	0.853612	-1.18788	106.628	6.47086	0.247563	20.6829	134.03	0.112831	1257.74		0.863874	0.850588	-1.53798	106.628	6.47086	0.807147	20.6829	134.589	0.0875105	1257.74		0.863874	0.850588	-1.53798	106.628	5.92602	0.547246	20.6829	133.784	0.0869872
Haibei Zang A.P	Qinghai	0					58.7081	0	0.298222	4.87298	63.8793		0					58.7081	0	0.972313	4.87298	64.5534		0					58.7081	0	0.659228	4.87298	64.2404
Hainan Zang A.P	Qinghai	830.264	0	0.159167	0.158465	-0.441046	29.4148	3.31515	0.281333	12.6555	45.6668	0.103539	830.264	0	0.159167	0.157851	-0.826993	29.4148	3.31515	0.917247	12.6555	46.3027	0.0559895	830.264	0	0.159167	0.157851	-0.826993	29.4148	3.03601	0.621894	12.6555	45.7282	0.0552949
Haixi Mongolian & Zang A.P	Qinghai	0	904.625	0.105406	0.105187	-0.208337	49.9949	11.1553	0.809128	23.8826	85.8419	0.412051	0	904.625	0.105406	0.10469	-0.679183	49.9949	11.1553	2.63805	23.8826	87.6709	0.129077	0	904.625	0.105406	0.10469	-0.679183	49.9949	10.216	1.7886	23.8826	85.8821	0.126443
Xining City	Qinghai	1331.37	598.227	0.666626	0.649976	-2.4977	224.447	45.7168	0.458885	303.239	573.862	0.229756	1331.37	598.227	0.666626	0.628726	-5.68541	224.447	45.7168	1.49613	303.239	574.9	0.101119	1331.37	598.227	0.666626	0.628726	-5.68541	224.447	41.8675	1.01438	303.239	570.569	0.100357
Huangnan Zang AP	Qinghai	237.386		0.188759	0.188494	-0.140179	16.2662	0.22808	0.253591	2.42042	19.1683	0.136734	237.386		0.188759	0.188426	-0.176204	16.2662	0.22808	0.8268	2.42042	19.7415	0.112055	237.386		0.188759	0.188426	-0.176204	16.2662	0.208876	0.560571	2.42042	19.4561	0.110435
Dongying City	Shandong	12523		2.66956	2.12509	-20.3955	140.72	116.859	3.81684	53.9423	315.338	0.0154612	12523		2.66956	2.11704	-20.6971	140.72	116.859	6.14999	53.9423	317.672	0.0153486	12523		2.66956	2.11704	-20.6971	140.72	115.256	4.16969	46.7156	306.861	0.0148263
Linyi City	Shandong	45652.4	531.633	1.03564	0.846278	-18.2844	257.547	311.684	0.853434	40.0749	610.159	0.0333706	45652.4	531.633	1.03564	0.841108	-18.7836	257.547	311.684	1.37512	40.0749	610.681	0.0325115	45652.4	531.633	1.03564	0.841108	-18.7836	257.547	307.408	0.93233	34.706	600.593	0.0319745
Weihai City	Shandong	2255.24	661.738	0.840837	0.798373	-5.05019	146.843	118.556	2.48938	87.4458	355.334	0.0703605	2255.24	661.738	0.840837	0.7904	-5.99844	146.843	118.556	4.01108	87.4458	356.856	0.0594914	2255.24	661.738	0.840837	0.7904	-5.99844	146.843	116.93	2.71951	75.7306	342.222	0.0570519
Dezhou City	Shandong	22773.6	20.3243	2.10089	1.76684	-15.9007	183.338	186.072	1.11899	88.4358	458.964	0.0288644	22773.6	20.3243	2.10089	1.76136	-16.1616	183.338	186.072	1.803	88.4358	459.648	0.0284408	22773.6	20.3243	2.10089	1.76136	-16.1616	183.338	183.519	1.22244	76.5879	444.667	0.0275138
Rizhao City	Shandong	10626.1	2059.43	0.895587	0.764344	-14.6544	132.527	103.914	1.35293	58.518	296.312	0.0202199	10626.1	2059.43	0.895587	0.758578	-15.2982	132.527	103.914	2.17995	58.518	297.139	0.0194231	10626.1	2059.43	0.895587	0.758578	-15.2982	132.527	102.488	1.478	50.6783	287.171	0.0187716
Zaozhuang City	Shandong	13485.7	362.71	1.80199	1.37604	-23.6379	138.865	140.225	1.22679	81.471	361.787	0.0153054	13485.7	362.71	1.80199	1.3658	-24.2059	138.865	140.225	1.97669	81.471	362.537	0.0149772	13485.7	362.71	1.80199	1.3658	-24.2059	138.865	138.301	1.3402	70.5562	349.062	0.0144205
Taian City	Shandong	15676.2	1497.58	1.79232	1.48466	-17.1654	112.229	154.103	1.31521	78.8294	346.477	0.0201846	15676.2	1497.58	1.79232	1.47762	-17.5583	112.229	154.103	2.11917	78.8294	347.281	0.0197787	15676.2	1497.58	1.79232	1.47762	-17.5583	112.229	151.989	1.4368	68.2685	333.924	0.019018
Jinan City	Shandong	35708.5	2985.8	1.68188	1.27858	-23.9792	282.984	289.72	2.00039	167.403	742.108	0.0309479	35708.5	2985.8	1.68188	1.27042	-24.4641	282.984	289.72	3.22318	167.403	743.33	0.0303845	35708.5	2985.8	1.68188	1.27042	-24.4641	282.984	285.745	2.18531	144.976	715.891	0.0292629
Jining City	Shandong	37871.2	4520.43	2.25418	1.761	-21.8785	278.078	297.177	1.12986	123.454	699.838	0.0319876	37871.2	4520.43	2.25418	1.75374	-22.2007	278.078	297.177	1.82052	123.454	700.529	0.0315544	37871.2	4520.43	2.25418	1.75374	-22.2007	278.078	293.1	1.23431	106.914	679.326	0.0305994
Zibo City	Shandong	19841	3242.76	1.80373	1.38749	-23.0769	184.645	250.247	2.07759	213.336	650.305	0.0281799	19841	3242.76	1.80373	1.37547	-23.7433	184.645	250.247	3.34757	213.336	651.575	0.0274424	19841	3242.76	1.80373	1.37547	-23.7433	184.645	246.813	2.26965	184.755	618.483	0.0260487
Binzhou City	Shandong	16948.6	134.817	1.69948	1.45682	-14.2783	159.229	155.581	1.42462	157.773	474.007	0.0331978	16948.6	134.817	1.69948	1.45135	-14.6003	159.229	155.581	2.29545	157.773	474.878	0.0325253	16948.6	134.817	1.69948	1.45135	-14.6003	159.229	153.446	1.55632	136.636	450.867	0.0308808
Weifang City	Shandong	41608.7	1801.65	1.37643	0.976753	-29.0372	451.683	457.314	1.29971	343.546	1253.84	0.0431806	41608.7	1801.65	1.37643	0.963661	-29.9884	451.683	457.314	2.09419	343.546	1254.64	0.0418374	41608.7	1801.65	1.37643	0.963661	-29.9884	451.683	451.04	1.41986	297.521	1201.66	0.0400709
Yantai City	Shandong	3891.6	271.828	0.631555	0.60753	-3.80421	205.858	262.89	2.14148	176.233	647.123	0.170107	3891.6	271.828	0.631555	0.601195	-4.80726	205.858	262.89	3.45051	176.233	648.432	0.134886	3891.6	271.828	0.631555	0.601195	-4.80726	205.858	259.284	2.33945	152.623	620.104	0.128993
Liaocheng City	Shandong	19047.2	4813.59	3.45852	2.66632	-22.9058	199.559	244.935	1.04172	111.263	556.798	0.0243082	19047.2	4813.59	3.45852	2.65388	-23.2655	199.559	244.935	1.67849	111.263	557.435	0.0239598	19047.2	4813.59	3.45852	2.65388	-23.2655	199.559	241.575	1.13802	96.3566	538.628	0.0231514
Laiwu City	Shandong	5197.99	2570.39	2.16361	1.66883	-22.868	23.812	39.5986	1.14961	31.4321	95.9924	0.0041977	5197.99	2570.39	2.16361	1.66147	-23.2085	23.812	39.5986	1.85234	31.4321	96.6951	0.0041664	5197.99	2570.39	2.16361	1.66147	-23.2085	23.812	39.0554	1.25588	27.2211	91.3444	0.0039358
Heze City	Shandong	23941	1060.65	1.43308	1.27831	-10.7999	210.721	175.953	0.660052	93.8534	481.188	0.0445551	23941	1060.65	1.43308	1.27499	-11.0316	210.721	175.953	1.06353	93.8534	481.592	0.043656	23941	1060.65	1.43308	1.27499	-11.0316	210.721	173.54	0.72107	81.2797	466.262	0.0422663
Qingdao City	Shandong	19997.9	222.096	3.77032	2.1565	-42.8032	499.485	449.978	2.38687	428.559	1380.41	0.0322501	19997.9	222.096	3.77032	2.11645	-43.8656	499.485	449.978	3.84591	428.559	1381.87	0.0315023	19997.9	222.096	3.77032	2.11645	-43.8656	499.485	443.804	2.60753	371.144	1317.04	0.0300245
Linfen City	Shanxi	4523.41	851.538	1.37264	1.28906	-6.08948	171.756	359.799	0.612853	73.9358	606.104	0.0995327	4523.41	851.538	1.37264	1.27753	-6.92925	171.756	359.799	1.22104	73.9358	606.712	0.087558	4523.41	851.538	1.37264	1.27753	-6.92925	171.756	346.002	0.827866	60.8178	579.404	0.0836169
Luliang City	Shanxi	2031.11	636.601	0.806133	0.786639	-2.41824	162.883	232.08	0.583984	53.4198	448.966	0.185659	2031.11	636.601	0.806133	0.781163	-3.09745	162.883	232.08	1.16352	53.4198	449.546	0.145134	2031.11	636.601	0.806133	0.781163	-3.09745	162.883	223.18	0.788869	43.9418	430.793	0.13908
Datong City	Shanxi	7211.93	1810.87	1.12438	1.00629	-10.5032	165.234	492.116	0.723796	156.022	814.097	0.0775096	7211.93	1810.87	1.12438	0.989342	-12.0102	165.234	492.116	1.44208	156.022	814.815	0.0678436	7211.93	1810.87	1.12438	0.989342	-12.0102	165.234	473.245	0.977733	128.34	767.797	0.0639288
Taiyuan City	Shanxi	24182.9	3426.45	1.99832	1.21861	-39.0182	326.858	1360.73	1.48274	475.098	2164.17	0.0554655	24182.9	3426.45	1.99832	1.16234	-41.834	326.858	1360.73	2.9542	475.098	2165.64	0.0517674	24182.9	3426.45	1.99832	1.16234	-41.834	326.858	1308.55	2.00295	390.804	2028.21	0.0484824
Xinzhou City	Shanxi	4643.78	306.379	0.590579	0.565289	-4.28235	112.749	346.923	0.507561	49.8889	510.068	0.119109	4643.78	306.379	0.590579	0.55875	-5.3895	112.749	346.923	1.01126	49.8889	510.572	0.0947343	4643.78	306.379	0.590579	0.55875	-5.3895	112.749	333.619	0.685634	41.0374	488.091	0.0905631
Jinzhong City	Shanxi	2212	414.173	1.0857	1.04966	-3.31951	163.483	399.078	0.73419	105.611	668.906	0.201507	2212	414.173	1.0857	1.03835	-4.36178	163.483	399.078	1.46279	105.611	669.635	0.153524	2212	414.173	1.0857	1.03835	-4.36178	163.483	383.774	0.991773	86.873	635.122	0.145612
Jincheng City	Shanxi	993.421	50.2593	0.603773	0.586889	-2.79645	147.657	396.518	1.0509	63.0448	608.27	0.217515	993.421	50.2593	0.603773	0.57603	-4.59484	147.657	396.518	2.09381	63.0448	609.313	0.132608	993.421	50.2593	0.603773	0.57603	-4.59484	147.657	381.312	1.4196	51.8591	582.247	0.126717
Shuozhou City	Shanxi	2735.47	1045.29	1.75621	1.65669	-5.66676	64.1314	168.819	1.19716	41.8845	276.032	0.0487106	2735.47	1045.29	1.75621	1.64788	-6.16807	64.1314	168.819	2.38522	41.8845	277.22	0.0449441	2735.47	1045.29	1.75621	1.64788	-6.16807	64.1314	162.345	1.61718	34.4531	262.547	0.0425652
Yuncheng City	Shanxi	4989.12	1106.99	1.88978	1.80135	-4.67953	172.815	487.98	0.520945	83.3605	744.676	0.159135	4989.12	1106.99	1.88978	1.79029	-5.26457	172.815	487.98	1.03792	83.3605	745.193	0.141548	4989.12	1106.99	1.88978	1.79029	-5.26457	172.815	469.267	0.703713	68.5703	711.356	0.135121
Changzhi City	Shanxi	12632.3	3467.04	0.752482	0.64732	-13.9754	294.712	584.577	0.818157	131.98	1012.09	0.0724193	12632.3	3467.04	0.752482	0.632059	-16.0035	294.712	584.577	1.63009	131.98	1012.9	0.0632925	12632.3	3467.04	0.752482	0.632059	-16.0035	294.712	562.159	1.1052	108.564	966.541	0.0603957
Yangquan City	Shanxi	6309.03	1035.17	0.87537	0.697911	-20.2724	33.4401	285.058	0.997045	61.4288	380.924	0.0187903	6309.03	1035.17	0.87537	0.675777	-22.801	33.4401	285.058	1.9865	61.4288	381.914	0.0167499	6309.03	1035.17	0.87537	0.675777	-22.801	33.4401	274.127	1.34685	50.5298	359.444	0.0157644
Xianyang City	Shaanxi	13069.7	1103.49	2.90612	2.33251	-19.7378	151.803	273.942	15.0511	523.432	964.228	0.0488518	13069.7	1103.49	2.90612	2.27547	-21.7008	151.803	273.942	195.799	523.432	1144.98	0.0527619	13069.7	1103.49	2.90612	2.27547	-21.7008	151.803	263.88	132.751	353.281	901.716	0.0415522
Shangluo City	Shaanxi	3474.6	4.72068	0.163696	0.161712	-1.21158	37.1317	47.0869	9.15522	96.1937	189.567	0.156465	3474.6	4.72068	0.163696	0.159629	-2.48425	37.1317	47.0869	119.1	96.1937	299.512	0.120566	3474.6	4.72068	0.163696	0.159629	-2.48425	37.1317	45.3574	80.7496	64.9243	228.163	0.0918453
Ankang City	Shaanxi	3336.93	0	0.125807	0.125325	-0.383205	62.9976	53.4633	10.1181	83.6301	210.209	0.548525	3336.93	0	0.125807	0.124581	-0.974584	62.9976	53.4633	131.625	83.6301	331.716	0.340353	3336.93	0	0.125807	0.124581	-0.974584	62.9976	51.4995	89.2418	56.4448	260.184	0.266958
Baoji City	Shaanxi	13674.3	109.471	0.465293	0.441198	-5.1785	60.3822	175.118	16.4856	209.041	461.026	0.0890271	13674.3	109.471	0.465293	0.432262	-7.09906	60.3822	175.118	214.46	209.041	659.001	0.0928294	13674.3	109.471	0.465293	0.432262	-7.09906	60.3822	168.685	145.404	141.088	515.56	0.0726238
Yan'an City	Shaanxi	470.43	30.9026	0.491067	0.487254	-0.77631	47.8231	60.1591	18.6896	52.62	179.292	0.230956	470.43	30.9026	0.491067	0.476649	-2.93602	47.8231	60.1591	243.132	52.62	403.734	0.137511	470.43	30.9026	0.491067	0.476649	-2.93602	47.8231	57.9493	164.844	35.515	306.131	0.104267
Yulin City	Shaanxi	6805.95	121.967	0.597033	0.5759	-3.53977	105.301	126.576	26.7801	191.163	449.82	0.127077	6805.95	121.967	0.597033	0.567065	-5.01955	105.301	126.576	348.381	191.163	771.421	0.153683	6805.95	121.967	0.597033	0.567065	-5.01955	105.301	121.927	236.202	129.023	592.452	0.118029
Hanzhong City	Shaanxi	4325.24	0	0.207402	0.206441	-0.463256	71.9898	137.993	10.7447	157.711	378.438	0.816963	4325.24	0	0.207402	0.204697	-1.30423	71.9898	137.993	139.777	157.711	507.47	0.3891	4325.24	0	0.207402	0.204697	-1.30423	71.9898	132.924	94.7688	106.444	406.127	0.311396
Weinan City	Shaanxi	10467.4	0	2.29643	2.06479	-10.0871	92.019	159.423	9.51464	212.149	473.106	0.0469021	10467.4	0	2.29643	2.04359	-11.0102	92.019	159.423	123.775	212.149	587.367	0.0533475	10467.4	0	2.29643	2.04359	-11.0102	92.019	153.567	83.9196	143.186	472.693	0.0429323
Xi'an City	Shaanxi	25686.8	918.333	0.915564	0.816847	-10.782	419.779	1044.42	23.2002	1591.19	3078.59	0.28553	25686.8	918.333	0.915564	0.758872	-17.1142	419.779	1044.42	301.809	1591.19	3357.2	0.196165	25686.8	918.333	0.915564	0.758872	-17.1142	419.779	1006.06	204.627	1073.95	2704.41	0.158022
Tongchuan City	Shaanxi	1939.1	146.189	0.706119	0.64593	-8.52399	11.0531	25.4914	13.3015	28.8337	78.6797	0.0092304	1939.1	146.189	0.706119	0.630678	-10.6839	11.0531	25.4914	173.038	28.8337	238.417	0.0223154	1939.1	146.189	0.706119	0.630678	-10.6839	11.0531	24.5551	117.32	19.4608	172.389	0.0161353
Shanghai	Shanghai	49640.1	268.769	3.34668	3.02707	-9.54986	808.808	866.012	48.7414	1859.44	3583	0.375189	49640.1	268.769	3.34668	3.0271	-9.549	808.808	866.012	45.9847	1859.44	3580.24	0.374934	49640.1	268.769	3.34668	3.0271	-9.549	808.808	853.128	31.1776	1430.1	3123.21	0.327073
Leshan City	Sichuan	10864.9	0	0.204849	0.202602	-1.09671	64.4963	139.695	2.73575	29.3201	236.247	0.215418	10864.9	0	0.204849	0.202064	-1.35939	64.4963	139.695	56.3488	29.3201	289.86	0.213232	10864.9	0	0.204849	0.202064	-1.35939	64.4963	131.6	38.2045	26.7988	261.1	0.192075
Neijiang City	Sichuan	8504.52	61.0869	1.17752	1.10595	-6.07786	57.4334	100.709	2.19555	27.1751	187.513	0.030852	8504.52	61.0869	1.17752	1.10318	-6.31352	57.4334	100.709	45.2223	27.1751	230.539	0.0365154	8504.52	61.0869	1.17752	1.10318	-6.31352	57.4334	94.8731	30.6607	24.8382	207.805	0.0329146
Liangshan Yi A.P	Sichuan	5914.03	0	0.132901	0.132682	-0.164559	32.2326	48.0197	1.93521	3.26474	85.4523	0.519236	5914.03	0	0.132901	0.132631	-0.202933	32.2326	48.0197	39.8599	3.26474	123.377	0.607877	5914.03	0	0.132901	0.132631	-0.202933	32.2326	45.2373	27.025	2.984	107.479	0.529547
Nanchong City	Sichuan	12675.7	54.3423	0.499763	0.483636	-3.22693	69.0281	185.517	1.63441	66.5963	322.776	0.100025	12675.7	54.3423	0.499763	0.481822	-3.58992	69.0281	185.517	33.6644	66.5963	354.806	0.0988338	12675.7	54.3423	0.499763	0.481822	-3.58992	69.0281	174.767	22.8244	60.8696	327.49	0.0912246
Yibin City	Sichuan	6214.15	0	0.257921	0.256061	-0.721306	45.0643	104.617	2.33107	36.3603	188.372	0.261161	6214.15	0	0.257921	0.255597	-0.900858	45.0643	104.617	48.0134	36.3603	234.054	0.259812	6214.15	0	0.257921	0.255597	-0.900858	45.0643	98.5545	32.5531	33.2336	209.405	0.232451
Bazhong City	Sichuan	1552.16	0	0.128544	0.12818	-0.282938	28.0435	62.9776	1.0318	13.3173	105.37	0.372499	1552.16	0	0.128544	0.127763	-0.607651	28.0435	62.9776	21.2522	13.3173	125.591	0.206697	1552.16	0	0.128544	0.127763	-0.607651	28.0435	59.3284	14.409	12.1722	113.953	0.187544
Guangyuan City	Sichuan	3770.39	0	0.12131	0.120597	-0.587669	67.7961	113.014	1.59212	32.6653	215.067	0.365932	3770.39	0	0.12131	0.119948	-1.12266	67.7961	113.014	32.7932	32.6653	246.268	0.219355	3770.39	0	0.12131	0.119948	-1.12266	67.7961	106.465	22.2338	29.8563	226.352	0.201615
Guangan City	Sichuan	6576.25	17.605	0.469171	0.457591	-2.46806	40.2868	89.3965	2.12479	16.6294	148.438	0.0601435	6576.25	17.605	0.469171	0.456303	-2.74275	40.2868	89.3965	43.7647	16.6294	190.077	0.0693017	6576.25	17.605	0.469171	0.456303	-2.74275	40.2868	84.2165	29.6724	15.1994	169.375	0.0617537
Deyang City	Sichuan	12747.4	0	1.06305	1.0095	-5.03776	61.6457	193.907	3.12778	46.1758	304.856	0.0605136	12747.4	0	1.06305	1.00655	-5.31545	61.6457	193.907	64.4234	46.1758	366.152	0.0688835	12747.4	0	1.06305	1.00655	-5.31545	61.6457	182.671	43.679	42.205	330.201	0.0621201
Chengdu City	Sichuan	66317.3	412.413	1.36861	1.21437	-11.2697	531.775	1223.4	5.08324	403.541	2163.8	0.192	66317.3	412.413	1.36861	1.20636	-11.855	531.775	1223.4	104.701	403.541	2263.41	0.190924	66317.3	412.413	1.36861	1.20636	-11.855	531.775	1152.51	70.9869	368.84	2124.11	0.179173
Panzhihua City	Sichuan	3661.8	0	0.238464	0.236498	-0.824735	33.8258	56.4482	5.13833	20.5641	115.976	0.140625	3661.8	0	0.238464	0.236013	-1.02812	33.8258	56.4482	105.835	20.5641	216.673	0.210752	3661.8	0	0.238464	0.236013	-1.02812	33.8258	53.1773	71.7563	18.7957	177.555	0.172703
Luzhou City	Sichuan	8417.2	48.5033	0.283855	0.280169	-1.29855	59.1855	95.4096	2.1705	19.0616	175.827	0.135406	8417.2	48.5033	0.283855	0.279605	-1.49728	59.1855	95.4096	44.7063	19.0616	218.363	0.14584	8417.2	48.5033	0.283855	0.279605	-1.49728	59.1855	89.8812	30.3109	17.4225	196.8	0.131438
Ganzi Zang A.P	Sichuan	806.137		0.016322	0.0163197	-0.0140914	3.17863	4.08774	1.26087	0.384499	8.91174	0.623241	806.137		0.016322	0.0163171	-0.0300208	3.17863	4.08774	25.9704	0.384499	33.6213	1.10302	806.137		0.016322	0.0163171	-0.0300208	3.17863	3.85088	17.6079	0.351435	24.9889	0.819817
Meishan City	Sichuan	7108.17	0	0.522279	0.513879	-1.60839	36.0237	79.4757	2.3529	22.1272	139.98	0.0870311	7108.17	0	0.522279	0.513187	-1.74085	36.0237	79.4757	48.4631	22.1272	186.09	0.106896	7108.17	0	0.522279	0.513187	-1.74085	36.0237	74.8705	32.858	20.2245	163.977	0.0941935
Mianyang City	Sichuan	16804.3	0	0.328931	0.322043	-2.09418	98.5943	229.742	2.447	37.498	368.281	0.175859	16804.3	0	0.328931	0.320946	-2.42771	98.5943	229.742	50.4014	37.498	416.235	0.171451	16804.3	0	0.328931	0.320946	-2.42771	98.5943	216.429	34.1721	34.2735	383.469	0.157954
Zigong City	Sichuan	9176.22	0	0.901056	0.838261	-6.96904	51.5663	128.95	2.83663	17.0974	200.451	0.028763	9176.22	0	0.901056	0.834489	-7.38763	51.5663	128.95	58.4266	17.0974	256.041	0.034658	9176.22	0	0.901056	0.834489	-7.38763	51.5663	121.478	39.6133	15.6271	228.285	0.030901
Ziyang City	Sichuan	7699.88		1.06622	1.02513	-3.85343	32.1279	80.0431	2.44344	12.2088	126.823	0.0329113	7699.88		1.06622	1.02359	-3.99833	32.1279	80.0431	50.3281	12.2088	174.708	0.043695	7699.88		1.06622	1.02359	-3.99833	32.1279	75.405	34.1224	11.159	152.814	0.0382193
Dazhou City	Sichuan	9918.59	0	0.247826	0.244553	-1.32073	69.027	116.594	1.66596	27.832	215.119	0.162879	9918.59	0	0.247826	0.243958	-1.56049	69.027	116.594	34.3142	27.832	247.767	0.158775	9918.59	0	0.247826	0.243958	-1.56049	69.027	109.838	23.265	25.4387	227.569	0.145831
Suining City	Sichuan	10211	0	0.831447	0.771834	-7.16984	49.7316	149.886	1.90728	27.0716	228.596	0.0318831	10211	0	0.831447	0.767782	-7.65715	49.7316	149.886	39.2847	27.0716	265.974	0.0347353	10211	0	0.831447	0.767782	-7.65715	49.7316	141.201	26.635	24.7436	242.311	0.0316451
Aba Zang & Qiang A.P	Sichuan	1631.52	0	0.0142366	0.0142287	-0.0554908	26.4773	16.9735	1.9606	2.40004	47.8114	0.856418	1631.52	0	0.0142366	0.0142091	-0.193164	26.4773	16.9735	40.3828	2.40004	86.2337	0.44546	1631.52	0	0.0142366	0.0142091	-0.193164	26.4773	15.99	27.3796	2.19365	72.0405	0.372142
Yaan City	Sichuan	2899.13	0	0.095584	0.0953226	-0.273477	25.1064	39.302	2.22587	13.6242	80.2585	0.293462	2899.13	0	0.095584	0.0951833	-0.419212	25.1064	39.302	45.8467	13.6242	123.879	0.295472	2899.13	0	0.095584	0.0951833	-0.419212	25.1064	37.0247	31.0841	12.4526	105.668	0.252035
Tianjin	Tianjin	44469.3	9912.36	3.3698	2.36162	-29.918	456.786	733.464	76.5611	916.472	2183.28	0.0729756	44469.3	9912.36	3.3698	2.31189	-31.3939	456.786	733.464	137.436	916.472	2244.16	0.0714838	44469.3	9912.36	3.3698	2.31189	-31.3939	456.786	703.406	93.182	756.361	2009.73	0.0640167
Urumqi City	Xinjiang	4799.08	3311.56	0.948	0.887716	-6.35908	195.908	235.554	64.9193	492.343	988.724	0.155482	4799.08	3311.56	0.948	0.833641	-12.0632	195.908	235.554	193.432	492.343	1117.24	0.0926155	4799.08	3311.56	0.948	0.833641	-12.0632	195.908	223.917	131.147	328.681	879.652	0.0729204
111 Kazak A.P	Xinjiang	0					13.6601	0	29.9333	0	43.5933		0					13.6601	0	89.1883	0	102.848		0					13.6601	0	60.4697	0	74.1297
Ili	Xinjiang	1872.23	0	0.0565028	0.0559894	-0.908628	74.0012	44.9083	29.9333	135.267	284.11	0.312677	1872.23	0	0.0565028	0.0551034	-2.47669	74.0012	44.9083	89.1883	135.267	343.365	0.138646	1872.23	0	0.0565028	0.0551034	-2.47669	74.0012	42.6896	60.4697	90.302	267.462	0.107997
Kizilsu Kirgiz A.P	Xinjiang	0		0.459648	0.459603	-0.00987713	8.84159	1.93806	14.6509	2.55577	27.9864	2.836	0		0.459648	0.459513	-0.0293921	8.84159	1.93806	43.6536	2.55577	56.989	1.93858	0		0.459648	0.459513	-0.0293921	8.84159	1.84231	29.5971	1.70619	41.9872	1.42827
Karamay City	Xinjiang	0	909.702	10.7542	10.6158	-1.28712	25.7437	56.4027	114.411	84.257	280.815	0.218176	0	909.702	10.7542	10.3418	-3.83505	25.7437	56.4027	340.897	84.257	507.3	0.132281	0	909.702	10.7542	10.3418	-3.83505	25.7437	53.6161	231.128	56.2487	366.736	0.0956282
Bortala Mongolian A.P	Xinjiang	0	256.075	0.94223	0.941792	-0.0465704	23.8884	7.27658	52.083	25.0396	108.288	2.32551	0	256.075	0.94223	0.940923	-0.138745	23.8884	7.27658	155.185	25.0396	211.39	1.52357	0	256.075	0.94223	0.940923	-0.138745	23.8884	6.91708	105.216	16.7161	152.737	1.10084
Turpan Prefecture	Xinjiang	0		148.553	148.553		15.4501	0.0638075	28.3072	15.8656	59.6867	5810.82	0		148.553	148.553		15.4501	0.0638075	84.3434	15.8656	115.723	5633.12	0		148.553	148.553		15.4501	0.0606551	57.1848	10.5916	83.2872	4054.23
Hotan Prefecture	Xinjiang	0					12.2523	0	8.92051	28.9449	50.1177		0					12.2523	0	26.5793	28.9449	67.7765		0					12.2523	0	18.0208	19.3232	49.5963
Hami Prefecture	Xinjiang	0	600.128	1.02855	1.02696	-0.154392	25.4219	14.6005	59.9669	6.79362	106.783	0.691485	0	600.128	1.02855	1.02382	-0.460162	25.4219	14.6005	178.676	6.79362	225.492	0.490055	0	600.128	1.02855	1.02382	-0.460162	25.4219	13.8791	121.142	4.53531	164.979	0.358543
Kashi Prefecture	Xinjiang	0	349.46	2.01717	2.01604	-0.0560685	51.4016	58.5369	15.2221	121.138	246.298	4.39444	0	349.46	2.01717	2.01381	-0.167016	51.4016	58.5369	45.3552	121.138	276.432	1.65519	0	349.46	2.01717	2.01381	-0.167016	51.4016	55.6448	30.7509	80.8698	218.667	1.30932
Tacheng Prefecture	Xinjiang	0	0	1.19092	1.19035	-0.0479461	25.4544	23.0379	40.1392	40.1238	128.755	2.68368	0	0	1.19092	1.18922	-0.142915	25.4544	23.0379	119.598	40.1238	208.214	1.45644	0	0	1.19092	1.18922	-0.142915	25.4544	21.8997	81.0873	26.786	155.227	1.08581
Bayingolin Mongolian A.P	Xinjiang	51.8968	9.61052	0.526487	0.525968	-0.098559	38.4898	43.7257	64.3158	54.7442	201.275	2.04188	51.8968	9.61052	0.526487	0.524979	-0.286351	38.4898	43.7257	191.634	54.7442	328.594	1.14749	51.8968	9.61052	0.526487	0.524979	-0.286351	38.4898	41.5654	129.928	36.5464	246.529	0.860911
Changji Hui A.P	Xinjiang	403.829	564.565	1.63989	1.63685	-0.185379	62.0211	34.9006	62.2217	103.883	263.026	1.41866	403.829	564.565	1.63989	1.63409	-0.353317	62.0211	34.9006	185.394	103.883	386.199	1.09303	403.829	564.565	1.63989	1.63409	-0.353317	62.0211	33.1763	125.697	69.3505	290.245	0.821463
Aksu Prefecture	Xinjiang	263.606	1243.27	2.35907	2.35679	-0.0966906	56.9378	55.0715	24.8683	129.128	266.006	2.75203	263.606	1243.27	2.35907	2.35414	-0.208853	56.9378	55.0715	74.0968	129.128	315.234	1.50953	263.606	1243.27	2.35907	2.35414	-0.208853	56.9378	52.3507	50.2376	86.2041	245.73	1.1767
Altay Prefecture	Xinjiang	0	1035.73	0.473048	0.472894	-0.0326182	29.0296	10.8806	30.5611	12.765	83.2364	2.55304	0	1035.73	0.473048	0.472589	-0.0971571	29.0296	10.8806	91.0592	12.765	143.734	1.47965	0	1035.73	0.473048	0.472589	-0.0971571	29.0296	10.343	61.7381	8.52173	109.632	1.1286
Lincang City	Yunnan	1845.55	0	0.128858	0.12865	-0.162038	33.1431	15.2113	1.50005	18.2033	68.0578	0.42002	1845.55	0	0.128858	0.128406	-0.351083	33.1431	15.2113	27.0173	18.2033	93.5751	0.266524	1845.55	0	0.128858	0.128406	-0.351083	33.1431	14.7834	18.3178	14.4461	80.6903	0.229825
Lijiang City	Yunnan	3124	684.81	0.127723	0.127014	-0.555343	62.5718	20.0686	1.69379	38.7556	123.09	0.221653	3124	684.81	0.127723	0.126353	-1.0724	62.5718	20.0686	30.5067	38.7556	151.903	0.141651	3124	684.81	0.127723	0.126353	-1.0724	62.5718	19.504	20.6836	30.7564	133.516	0.124505
Baoshan City	Yunnan	4971.89		0.136287	0.135675	-0.448979	40.1703	26.3077	1.60219	40.938	109.018	0.242837	4971.89		0.136287	0.13523	-0.775716	40.1703	26.3077	28.8569	40.938	136.273	0.175682	4971.89		0.136287	0.13523	-0.775716	40.1703	25.5676	19.565	32.4883	117.791	0.151856
Dali Bai A.P	Yunnan	1654.75	15.5166	0.265821	0.265161	-0.248363	90.8012	34.297	1.90217	63.8309	190.831	0.768344	1654.75	15.5166	0.265821	0.264236	-0.596379	90.8012	34.297	34.2598	63.8309	223.189	0.374246	1654.75	15.5166	0.265821	0.264236	-0.596379	90.8012	33.3321	23.2282	50.6561	198.018	0.332038
Dehong Dai & Jingpo A.P	Yunnan	200.826		0.0893177	0.0892892	-0.0319086	35.6067	13.3975	1.7177	25.1198	75.8418	2.37201	200.826		0.0893177	0.0890646	-0.28337	35.6067	13.3975	30.9373	25.1198	105.061	0.370686	200.826		0.0893177	0.0890646	-0.28337	35.6067	13.0206	20.9755	19.9351	89.5379	0.315914
Nujiang Lisu A.P	Yunnan	173.982	0.790427	0.0262438	0.026239	-0.01829	18.5132	1.99287	1.56117	4.12124	26.1885	1.4419	173.982	0.790427	0.0262438	0.0262119	-0.121553	18.5132	1.99287	28.1181	4.12124	52.7454	0.434139	173.982	0.790427	0.0262438	0.0262119	-0.121553	18.5132	1.93681	19.0641	3.27061	42.7847	0.352154
Puer City	Yunnan	2145.49	0	0.0570477	0.0569969	-0.0890483	50.6665	22.0569	1.47734	44.3694	118.57	1.33236	2145.49	0	0.0570477	0.0568485	-0.349181	50.6665	22.0569	26.6083	44.3694	143.701	0.411647	2145.49	0	0.0570477	0.0568485	-0.349181	50.6665	21.4363	18.0404	35.2115	125.355	0.359092
Wenshan Zhuang & Miao A.P	Yunnan	4441.51	5.14912	0.0934124	0.0931514	-0.279406	38.5016	21.954	1.3906	52.3712	114.218	0.408785	4441.51	5.14912	0.0934124	0.0928965	-0.552282	38.5016	21.954	25.0459	52.3712	137.873	0.249624	4441.51	5.14912	0.0934124	0.0928965	-0.552282	38.5016	21.3364	16.9811	41.5617	118.381	0.214333
Kunming City	Yunnan	33931.6	18.7298	0.317872	0.301936	-5.01336	293.471	296.386	4.4572	918.946	1513.26	0.301844	33931.6	18.7298	0.317872	0.293623	-7.62853	293.471	296.386	80.2783	918.946	1589.08	0.208307	33931.6	18.7298	0.317872	0.293623	-7.62853	293.471	288.048	54.4287	729.274	1365.22	0.178962
Zhaotong City	Yunnan	3046.39	2.32426	0.102214	0.101947	-0.260435	53.4245	34.7353	0.978542	57.5575	146.696	0.563316	3046.39	2.32426	0.102214	0.101432	-0.764575	53.4245	34.7353	17.6244	57.5575	163.342	0.213638	3046.39	2.32426	0.102214	0.101432	-0.764575	53.4245	33.7581	11.9494	45.6775	144.81	0.189399
Qujing City	Yunnan	3015.54	51.661	0.143471	0.14314	-0.23064	70.4092	64.5285	2.02067	125.85	262.808	1.13954	3015.54	51.661	0.143471	0.142315	-0.805601	70.4092	64.5285	36.3941	125.85	297.182	0.368911	3015.54	51.661	0.143471	0.142315	-0.805601	70.4092	62.7131	24.6752	99.8744	257.672	0.319865
Chuxiong Yi A.P	Yunnan	6766.34	0	0.260261	0.256765	-1.34319	67.3661	37.4125	2.08769	85.3017	192.168	0.143068	6766.34	0	0.260261	0.255345	-1.88868	67.3661	37.4125	37.6012	85.3017	227.681	0.120549	6766.34	0	0.260261	0.255345	-1.88868	67.3661	36.3599	25.4936	67.6953	196.915	0.10426
Yuxi City	Yunnan	3507.54	0	0.36355	0.360424	-0.860046	62.7344	36.3318	3.94585	89.5792	192.591	0.223933	3507.54	0	0.36355	0.358734	-1.32469	62.7344	36.3318	71.0684	89.5792	259.714	0.196056	3507.54	0	0.36355	0.358734	-1.32469	62.7344	35.3097	48.1844	71.0899	217.318	0.164052
Honghe Hani & Yi A.P	Yunnan	8204.49	0	0.140262	0.139493	-0.548543	94.4129	53.0089	1.96837	63.5706	212.961	0.388279	8204.49	0	0.140262	0.138834	-1.01838	94.4129	53.0089	35.4521	63.5706	246.445	0.242011	8204.49	0	0.140262	0.138834	-1.01838	94.4129	51.5176	24.0365	50.4495	220.417	0.216451
Xishuangbanna Dai A.P	Yunnan	2755.97		0.0858858	0.0856293	-0.298652	24.6493	13.9702	2.16262	27.9733	68.7554	0.230278	2755.97		0.0858858	0.0853518	-0.621756	24.6493	13.9702	38.9509	27.9733	105.544	0.169759	2755.97		0.0858858	0.0853518	-0.621756	24.6493	13.5772	26.4087	22.1996	86.8347	0.139667
Diqing Zang A.P	Yunnan	0		0.0299785	0.029973	-0.0183465	18.3009	3.98522	2.95445	2.04592	27.2865	1.50502	0		0.0299785	0.0298806	-0.326567	18.3009	3.98522	53.2125	2.04592	77.5445	0.237438	0		0.0299785	0.0298806	-0.326567	18.3009	3.8731	36.078	1.62364	59.8757	0.183337
Lishui City	Zhejiang	8885.24	1.57186	0.0433665	0.0429763	-0.899773	74.3763	102.205	1.63162	52.8717	231.084	0.256829	8885.24	1.57186	0.0433665	0.0429034	-1.06787	74.3763	102.205	2.12527	52.8717	231.578	0.216868	8885.24	1.57186	0.0433665	0.0429034	-1.06787	74.3763	98.5439	1.44093	38.2161	212.577	0.199074
Taizhou City	Zhejiang	11883.7	2947.63	0.195476	0.191345	-2.11351	287.169	347.26	1.86025	161.219	797.509	0.377341	11883.7	2947.63	0.195476	0.190749	-2.4181	287.169	347.26	2.42307	161.219	798.071	0.330044	11883.7	2947.63	0.195476	0.190749	-2.4181	287.169	334.821	1.64284	116.531	740.164	0.306097
Jiaxing City	Zhejiang	8373.56	589.531	0.594372	0.576966	-2.92852	129.692	314.816	2.42646	217.754	664.688	0.226971	8373.56	589.531	0.594372	0.575502	-3.17475	129.692	314.816	3.16059	217.754	665.422	0.209599	8373.56	589.531	0.594372	0.575502	-3.17475	129.692	303.539	2.14288	157.394	592.769	0.186714
Ningbo City	Zhejiang	27732.6	5884.64	0.194508	0.186422	-4.15736	338.977	825.425	3.23236	431.43	1599.07	0.384636	27732.6	5884.64	0.194508	0.185242	-4.76376	338.977	825.425	4.21032	431.43	1600.04	0.335877	27732.6	5884.64	0.194508	0.185242	-4.76376	338.977	795.859	2.85459	311.841	1449.53	0.304282
Hangzhou City	Zhejiang	37097	8674.45	0.202091	0.197755	-2.14528	408.574	497.707	3.54355	211.425	1121.25	0.522655	37097	8674.45	0.202091	0.197378	-2.33202	408.574	497.707	4.61566	211.425	1122.32	0.481263	37097	8674.45	0.202091	0.197378	-2.33202	408.574	479.88	3.12942	152.82	1044.4	0.44785
Wenzhou City	Zhejiang	35449.3	54.4999	0.167779	0.16204	-3.42033	318.734	524.828	1.60364	322.712	1167.88	0.341447	35449.3	54.4999	0.167779	0.161434	-3.78188	318.734	524.828	2.08883	322.712	1168.36	0.308937	35449.3	54.4999	0.167779	0.161434	-3.78188	318.734	506.029	1.41623	233.259	1059.44	0.280136
Huzhou City	Zhejiang	14560	2499.05	0.307915	0.297709	-3.31455	232.803	304.76	2.23841	178.754	718.556	0.21679	14560	2499.05	0.307915	0.296806	-3.60794	232.803	304.76	2.91564	178.754	719.234	0.199348	14560	2499.05	0.307915	0.296806	-3.60794	232.803	293.844	1.97681	129.205	657.829	0.182329
Shaoxing City	Zhejiang	15877.6	744.857	0.231543	0.226708	-2.08778	65.6183	256.695	2.84176	120.156	445.31	0.213293	15877.6	744.857	0.231543	0.226272	-2.27613	65.6183	256.695	3.70154	120.156	446.17	0.196022	15877.6	744.857	0.231543	0.226272	-2.27613	65.6183	247.5	2.50964	86.8497	402.478	0.176826
Zhoushan City	Zhejiang	0	267.717	0.175116	0.17229	-1.61362	51.1124	54.7105	3.0031	39.2931	148.119	0.091792	0	267.717	0.175116	0.171435	-2.10181	51.1124	54.7105	3.91169	39.2931	149.028	0.0709033	0	267.717	0.175116	0.171435	-2.10181	51.1124	52.7508	2.65213	28.4014	134.917	0.0641897
Quzhou City	Zhejiang	5074.22	302.096	0.0968881	0.0961311	-0.781314	96.9052	123.542	1.70017	41.4318	263.579	0.33735	5074.22	302.096	0.0968881	0.0959926	-0.924262	96.9052	123.542	2.21456	41.4318	264.094	0.285741	5074.22	302.096	0.0968881	0.0959926	-0.924262	96.9052	119.117	1.50147	29.9473	247.471	0.267756
Jinhua City	Zhejiang	33608.7	1218.19	0.144198	0.138884	-3.68501	274.529	448.267	1.97275	214.473	939.242	0.254882	33608.7	1218.19	0.144198	0.138305	-4.08654	274.529	448.267	2.5696	214.473	939.839	0.229986	33608.7	1218.19	0.144198	0.138305	-4.08654	274.529	432.211	1.74219	155.023	863.505	0.211306
Chongqing	Chongqing	96118.1	2627.93	0.206987	0.203533	-1.66842	900.859	993.772	24.7134	2443.04	4362.38	2.61472	96118.1	2627.93	0.206987	0.199841	-3.4522	900.859	993.772	251.175	2443.04	4588.84	1.32926	96118.1	2627.93	0.206987	0.199841	-3.4522	900.859	904.755	170.296	1925.55	3901.47	1.13014

## Sheet:  cities_WWTPs inventory (2025)
city	province	effluent_I_B_BAU	relcaimed_water_BAU	wsi_BAU	wsi'_BAU	deltawsi_BAU	CI_construction_BAU	CI_wastewater_BAU	CI_relcaimed_water_BAU	CI_sludge_disposal_BAU	CI_total_BAU	CIWSA_BAU	effluent_I_B_WRE	relcaimed_water_WRE	wsi_WRE	wsi’_WRE	deltawsi_WRE	CI_construction_WRE	CI_wastewater_WRE	CI_relcaimed_water_WRE	CI_sludge_disposal_WRE	CI_total_WRE	CIWSA_WRE	effluent_I_B_WRE_LCR	relcaimed_water_WRE_LCR	wsi_WRE_LCR	wsi‘_WRE_LCR	deltawsi_WRE_LCR	CI_construction_WRE_LCR	CI_wastewater_WRE_LCR	CI_relcaimed_water_WRE_LCR	CI_sludge_disposal_WRE_LCR	CI_total_WRE_LCR	CIWSA_WRE_LCR
Bozhou City	Anhui	9825.31	353.214	0.0244079	0.0202465	-17.0494	56.7271	85.3351	0.713832	149.504	292.28	0.0171431	7868.43	282.865	0.0195466	0.0115422	-40.9503	56.7271	72.1245	1.84399	120.238	250.934	0.0061277	9825.31	353.214	0.0244079	0.0143243	-41.3129	56.7271	81.1932	1.39994	77.8903	217.21	0.0052577
Liuan City	Anhui	8773.68		0.0073112	0.0066695	-8.77694	94.6939	86.2209	0.818524	146.76	328.493	0.0374223	6954.19		0.005795	0.0043884	-24.2726	94.6939	72.8732	2.11444	118.031	287.712	0.0118527	8773.68		0.0073112	0.0055524	-24.0562	94.6939	82.036	1.60525	76.4603	254.795	0.0105915
Hefei City	Anhui	35631.3	1339.95	0.133519	0.119717	-10.3373	292.794	287.162	2.77996	651.793	1234.53	0.119424	29311	1102.27	0.109835	0.0925604	-15.7278	292.794	242.707	7.18127	524.201	1066.88	0.0678342	35631.3	1339.95	0.133519	0.110846	-16.9811	292.794	273.224	5.45193	339.578	911.047	0.0536505
Anqing City	Anhui	18757.7	0	0.0146202	0.0137804	-5.74411	43.5148	91.4217	1.18272	91.4102	227.529	0.0396106	14216.7	0	0.0110808	0.0095055	-14.2165	43.5148	77.2689	3.05525	73.5162	197.355	0.0138817	18757.7	0	0.0146202	0.0126049	-13.7844	43.5148	86.9843	2.3195	47.6238	180.442	0.0130905
Xuancheng City	Anhui	12951.3	12.3748	0.004213	0.0037195	-11.7137	80.591	67.7363	1.43025	84.0437	233.801	0.0199576	9949.14	9.50622	0.0032364	0.0021604	-33.2468	80.591	57.2502	3.69467	67.5918	209.128	0.0062901	12951.3	12.3748	0.004213	0.0028661	-31.9701	80.591	64.4486	2.80494	43.786	191.631	0.0059939
Suzhou City	Anhui	11404.3	0	0.0363641	0.0313717	-13.7289	73.2884	89.2117	0.852408	100.476	263.829	0.0192172	8801.21	0	0.0280637	0.019409	-30.8395	73.2884	75.4009	2.20197	80.8076	231.699	0.0075131	11404.3	0	0.0363641	0.0252589	-30.5389	73.2884	84.8816	1.6717	52.3472	212.189	0.0069482
Chaohu City	Anhui	3133.52	0				55.6481	43.6238	0	90.2372	189.509		2743.3	0				55.6481	36.8704	0	72.5728	165.091		3133.52	0				55.6481	41.5064	0	47.0127	144.167
Chizhou City	Anhui	5145.88		0.0052311	0.0049344	-5.67185	27.3313	32.9464	1.44561	24.2326	85.9558	0.0151509	3856.31		0.0039202	0.0032752	-16.4532	27.3313	27.846	3.73435	19.4889	78.4005	0.0047651	5145.88		0.0052311	0.0044218	-15.4709	27.3313	31.3472	2.83507	12.6249	74.1385	0.0047922
Huaibei City	Anhui	6321	7369.82	0.132706	0.108014	-18.6063	60.5034	93.4683	1.33316	87.5381	242.843	0.0130516	5297.23	6176.19	0.111212	0.0737816	-33.657	60.5034	78.9986	3.44387	70.4021	213.348	0.0063389	6321	7369.82	0.132706	0.085257	-35.7549	60.5034	88.9316	2.61454	45.6065	197.656	0.0055281
Huainan City	Anhui	12751.6	0	0.166233	0.142321	-14.3844	54.2443	65.9655	1.00388	84.345	205.559	0.0142904	9864.55	0	0.128596	0.105029	-18.3266	54.2443	55.7535	2.59324	67.834	180.425	0.0098449	12751.6	0	0.166233	0.132838	-20.0892	54.2443	62.7637	1.96876	43.9429	162.92	0.0081098
Chuzhou City	Anhui	17290.6	0	0.0180745	0.0157889	-12.6454	70.1096	115.053	1.24102	175.888	362.292	0.0286507	13802	0	0.0144277	0.0100194	-30.5544	70.1096	97.2421	3.20584	141.457	312.014	0.0102117	17290.6	0	0.0180745	0.0125092	-30.7909	70.1096	109.469	2.43384	91.6358	273.648	0.0088873
Wuhu City	Anhui	20572.7	0	0.0641577	0.0584168	-8.94811	88.3697	137.512	2.57042	183.547	412	0.0460433	17159.4	0	0.0535132	0.0450547	-15.8064	88.3697	116.224	6.63999	147.617	358.851	0.022703	20572.7	0	0.0641577	0.0533079	-16.9111	88.3697	130.838	5.04099	95.6262	319.875	0.018915
Bengbu City	Anhui	9876.36	0	0.124784	0.113954	-8.67892	46.2539	132.564	1.45524	248.4	428.673	0.0493923	8105.27	0	0.102407	0.086431	-15.6003	46.2539	112.042	3.75921	199.774	361.829	0.0231938	9876.36	0	0.124784	0.104153	-16.5332	46.2539	126.13	2.85394	129.414	304.651	0.0184266
Tongling City	Anhui	7314.36	0	0.108033	0.0964247	-10.7451	29.5757	43.2538	2.18234	37.1725	112.184	0.0104404	5958.01	0	0.0879996	0.0739733	-15.939	29.5757	36.5578	5.63749	29.8958	101.667	0.0063785	7314.36	0	0.108033	0.0894378	-17.2125	29.5757	41.1544	4.27991	19.3665	94.3765	0.005483
Fuyang City	Anhui	17474.2	3929.71	0.0400074	0.0351127	-12.2345	74.2362	101.951	0.613057	141.665	318.466	0.0260303	13731.1	3087.93	0.0314375	0.0236943	-24.6305	74.2362	86.1685	1.58367	113.934	275.922	0.0112025	17474.2	3929.71	0.0400074	0.0299803	-25.0631	74.2362	97.0029	1.2023	73.8063	246.248	0.0098251
Maanshan City	Anhui	10220.7	0	0.0937395	0.0866112	-7.60437	63.7327	81.4256	2.31221	111.638	259.109	0.0340739	8598.76	0	0.0788641	0.068908	-12.6244	63.7327	68.8202	5.97296	89.7845	228.31	0.018085	10220.7	0	0.0937395	0.0809457	-13.6482	63.7327	77.4734	4.5346	58.1624	203.903	0.0149398
Huangshan City	Anhui	7815.88	0	0.0048339	0.0045737	-5.38282	39.0376	41.4326	1.47528	47.3171	129.263	0.0240073	6118.68	0	0.0037843	0.0032216	-14.8693	39.0376	35.0185	3.81098	38.0546	115.922	0.0077964	7815.88	0	0.0048339	0.0041287	-14.5886	39.0376	39.4216	2.89325	24.6518	106.004	0.007266
Beijing	Beijing	105966	35963.3	3.69948	2.31427	-37.4433	650.548	1118.99	2380.07	396.208	4545.82	0.121405	77894.9	26436.4	2.71947	1.84498	-32.1565	650.548	849.175	2485.86	298.76	4284.34	0.133234	105966	35963.3	3.69948	2.28183	-38.3204	650.548	990.308	2063.51	290.914	3995.28	0.10426
Sanming City	Fujian	10647.1	0	0.167539	0.166719	-0.489558	48.0565	49.1191	0.356754	28.2036	125.736	0.256848	8257.04	0	0.12993	0.129223	-0.544292	48.0565	40.516	0.846997	22.5201	111.939	0.205662	10647.1	0	0.167539	0.166486	-0.628571	48.0565	46.5224	0.647475	16.0438	111.27	0.177022
Nanping City	Fujian	11434.8	13.9949	0.19492	0.194134	-0.402884	38.4324	45.1549	0.267295	29.1558	113.01	0.280496	7976.86	9.76276	0.135975	0.135424	-0.405809	38.4324	37.2462	0.634606	23.2804	99.5935	0.245418	11434.8	13.9949	0.19492	0.193963	-0.491022	38.4324	42.7679	0.485116	16.5855	98.2708	0.200132
Xiamen City	Fujian	0	381.533	0.693578	0.682546	-1.59059	97.7946	200.822	0.474316	211.36	510.451	0.320918	0	327.861	0.59601	0.572437	-3.95512	97.7946	165.649	1.12611	168.767	433.336	0.109563	0	381.533	0.693578	0.664047	-4.2578	97.7946	190.206	0.860839	120.233	409.095	0.0960811
Ningde City	Fujian	4244.21	0	0.19328	0.192454	-0.427255	38.9567	69.221	0.272932	156.424	264.875	0.619929	3143	0	0.143131	0.142173	-0.669316	38.9567	57.0971	0.647988	124.902	221.604	0.331102	4244.21	0	0.19328	0.191922	-0.702814	38.9567	65.5617	0.495345	88.9828	193.997	0.276034
Quanzhou City	Fujian	13648.2	6430.23	0.567063	0.556584	-1.8478	173.785	244.133	0.380071	183.36	601.658	0.325605	11149.2	5252.87	0.463234	0.453299	-2.14475	173.785	201.374	0.902357	146.409	522.47	0.243604	13648.2	6430.23	0.567063	0.553257	-2.43453	173.785	231.227	0.689793	104.305	510.007	0.209489
Zhangzhou City	Fujian	15688.7	114.902	0.292708	0.2886	-1.40341	92.0018	88.0811	0.291636	78.8518	259.226	0.184713	12379.4	90.6656	0.230966	0.227627	-1.44601	92.0018	72.6539	0.692395	62.9616	228.31	0.157885	15688.7	114.902	0.292708	0.287743	-1.69609	92.0018	83.4248	0.529291	44.8553	220.811	0.130189
Fuzhou City	Fujian	28817.2	0	0.536704	0.521849	-2.76769	133.247	163.722	0.394965	143.188	440.552	0.159177	22409.5	0	0.417365	0.406666	-2.56327	133.247	135.047	0.937718	114.333	383.564	0.149639	28817.2	0	0.536704	0.520039	-3.10506	133.247	155.067	0.716825	81.4533	370.484	0.119317
Putian City	Fujian	12448.1	0	0.461997	0.446279	-3.40221	26.7781	61.6945	0.303722	57.8496	146.626	0.0430972	10070.1	0	0.37374	0.361667	-3.23051	26.7781	50.8888	0.72109	46.1918	124.58	0.0385634	12448.1	0	0.461997	0.44434	-3.82206	26.7781	58.4331	0.551227	32.9081	118.67	0.0310488
Longyan City	Fujian	4548.29	0	0.171404	0.170747	-0.383596	60.3968	72.6107	0.350902	45.1365	178.495	0.465332	3742.16	0	0.141025	0.140188	-0.593654	60.3968	59.8931	0.833105	36.0406	157.164	0.264747	4548.29	0	0.171404	0.170297	-0.646133	60.3968	68.7722	0.636855	25.6761	155.482	0.240635
Linxia Hui A.P	Gansu	2805.28		2.08367	1.92335	-7.69435	23.8413	23.9154	0.980523	43.828	92.5652	0.0120303	2162.11		1.60595	1.49568	-6.86653	23.8413	18.6328	2.18919	32.9963	77.6596	0.0113099	2805.28		2.08367	1.90775	-8.44317	23.8413	22.7508	1.7768	26.3881	74.757	0.0088541
Lanzhou City	Gansu	16697.7	697.033	9.58593	4.91823	-48.6932	139.831	206.517	5.30658	818.151	1169.81	0.024024	14132.4	589.944	8.11319	4.38031	-46.01	139.831	160.9	11.8479	615.952	928.531	0.020181	16697.7	697.033	9.58593	4.76903	-50.2496	139.831	196.46	9.61603	492.594	838.501	0.0166867
Jiayuguan City	Gansu	0	4026.27	39.6399	38.0723	-3.95453	26.1047	60.8368	7.2965	154.515	248.753	0.0629035	0	3789.1	37.3048	34.1549	-8.44363	26.1047	47.3988	16.2907	116.328	206.122	0.0244116	0	4026.27	39.6399	35.4502	-10.5693	26.1047	57.8743	13.222	93.0308	190.232	0.0179985
Tianshui City	Gansu	5305.72		1.19587	1.09756	-8.22118	58.5186	41.7387	1.5595	101.997	203.814	0.0247914	3801.91		0.856924	0.791773	-7.60287	58.5186	32.5191	3.48186	76.7895	171.309	0.0225322	5305.72		1.19587	1.0827	-9.46362	58.5186	39.7062	2.82597	61.4107	162.461	0.0171669
Dingxi City	Gansu	1772.79		1.18325	1.15786	-2.14546	37.9842	14.9058	1.02337	60.1089	114.022	0.0531448	1170.8		0.781447	0.766405	-1.92485	37.9842	11.6133	2.28485	45.2536	97.1359	0.0504641	1772.79		1.18325	1.15374	-2.49323	37.9842	14.1799	1.85444	36.1906	90.2091	0.0361813
Pingliang City	Gansu	2179.74		1.1654	1.11722	-4.13386	41.201	19.4335	1.72223	32.0944	94.4511	0.0228478	1476.08		0.789189	0.758998	-3.82552	41.201	15.1409	3.84517	24.1626	84.3496	0.0220492	2179.74		1.1654	1.10888	-4.84993	41.201	18.4871	3.12084	19.3235	82.1324	0.0169347
Qingyang City	Gansu	4817.18	0	2.29431	2.05828	-10.2875	38.1565	16.7348	2.54897	68.809	126.249	0.0122721	2864.72	0	1.3644	1.26827	-7.0453	38.1565	13.0383	5.69102	51.8035	108.689	0.0154273	4817.18	0	2.29431	2.04946	-10.6721	38.1565	15.9199	4.61898	41.4287	100.124	0.0093818
Zhangye City	Gansu	3864.11	0	1.47138	1.45304	-1.24624	30.5042	29.6902	2.85988	41.5248	104.579	0.0839143	2796.22	0	1.06475	1.05312	-1.09237	30.5042	23.1321	6.38519	31.2624	91.2838	0.0835673	3864.11	0	1.47138	1.4508	-1.39862	30.5042	28.2445	5.18238	25.0014	88.9324	0.0635856
Wuwei City	Gansu	364.25	0	3.71401	3.69723	-0.451749	37.5907	25.367	2.13588	103.232	168.325	0.372613	250.732	0	2.55653	2.54289	-0.533926	37.5907	19.7637	4.76872	77.7191	139.842	0.261923	364.25	0	3.71401	3.69104	-0.618496	37.5907	24.1317	3.87041	62.1541	127.747	0.206551
Gannan Zang A.P	Gansu	301.684	0	0.0367697	0.0366098	-0.434869	25.5675	6.007	1.67565	6.36491	39.615	0.091111	198.06	0	0.0241399	0.0238461	-1.21707	25.5675	4.68013	3.74119	4.79188	38.7807	0.0318642	301.684	0	0.0367697	0.0363715	-1.08296	25.5675	5.71448	3.03645	3.8322	38.1506	0.0352325
Baiyin City	Gansu	0	0	14.0784	14.0632	-0.107541	31.0729	19.433	2.36678	89.4349	142.308	1.32291	0	0	9.13862	9.10819	-0.333004	31.0729	15.1405	5.28425	67.3319	118.829	0.356844	0	0	14.0784	14.0379	-0.287533	31.0729	18.4867	4.28883	53.8472	107.696	0.37458
Jiuquan City	Gansu	3299.44	252.863	2.54163	2.50676	-1.37207	32.8449	36.3179	4.55659	102.872	176.591	0.128705	2314.64	177.39	1.78302	1.76253	-1.14906	32.8449	28.2957	10.1734	77.4479	148.762	0.12946	3299.44	252.863	2.54163	2.50318	-1.51297	32.8449	34.5493	8.25697	61.9372	137.589	0.0909416
Jinchang City	Gansu	0	362.218	16.1645	16.1157	-0.30202	34.2161	25.3039	4.44658	68.9472	132.914	0.44013	0	279.391	12.4682	12.3701	-0.78672	34.2161	19.7146	9.92778	51.9075	115.766	0.147153	0	362.218	16.1645	16.034	-0.80714	34.2161	24.0717	8.05764	41.5119	107.857	0.133633
Longnan City	Gansu	2204.36	0	0.156527	0.154753	-1.13316	38.3589	15.9401	1.13374	20.5656	75.9983	0.0670665	1465.08	0	0.104032	0.102102	-1.85558	38.3589	12.4191	2.53128	15.483	68.7923	0.0370726	2204.36	0	0.156527	0.153534	-1.912	38.3589	15.1639	2.05445	12.3822	67.9594	0.0355426
Dongguan City	Guangdong	85803.6	266.926	0.965464	0.696363	-27.8727	426.519	1116.95	1.49273	520.942	2065.91	0.0741193	77156.3	240.025	0.868165	0.614176	-29.2558	426.519	988.091	4.91732	426.286	1845.81	0.0630922	85803.6	266.926	0.965464	0.660306	-31.6074	426.519	1041.2	3.66816	302.607	1774	0.056126
ZhongShan City	Guangdong	31589.4	14.3422	1.23872	1.02638	-17.1415	430.045	468.42	1.85623	293.986	1194.31	0.0696736	28043.3	12.7322	1.09966	0.907729	-17.4539	430.045	414.379	6.11479	240.568	1091.11	0.0625136	31589.4	14.3422	1.23872	1.00098	-19.1924	430.045	436.653	4.56143	170.772	1042.03	0.054294
Yunfu City	Guangdong	9408.77	0	0.498517	0.490052	-1.69812	40.948	78.5866	0.574025	34.2944	154.403	0.0909254	7168.35	0	0.37981	0.373608	-1.633	40.948	69.5202	1.89095	28.063	140.422	0.0859906	9408.77	0	0.498517	0.48866	-1.9774	40.948	73.257	1.41058	19.9211	135.537	0.0685424
Foshan City	Guangdong	37398.1	1730.14	1.14242	1.0284	-9.98022	472.972	1019.36	2.13792	757.274	2251.74	0.225621	32494.9	1503.3	0.99264	0.883353	-11.0097	472.972	901.758	7.0427	619.675	2001.45	0.181789	37398.1	1730.14	1.14242	1.00239	-12.2571	472.972	950.229	5.25362	439.888	1868.34	0.152429
Guangzhou City	Guangdong	105436	15953.1	1.32569	1.18125	-10.8952	454.086	948.532	2.68847	754.116	2159.42	0.198199	80510.6	12181.6	1.01229	0.916602	-9.45256	454.086	839.101	8.85633	617.092	1919.14	0.203029	105436	15953.1	1.32569	1.17126	-11.6491	454.086	884.204	6.60653	438.054	1782.95	0.153055
Huizhou City	Guangdong	38342.6	28.7261	0.208716	0.201014	-3.69027	401.261	494.368	1.30746	248.213	1145.15	0.310316	34078	25.531	0.185502	0.176074	-5.08232	401.261	437.333	4.30701	203.112	1046.01	0.205814	38342.6	28.7261	0.208716	0.197017	-5.6055	401.261	460.84	3.21289	144.183	1009.5	0.180091
Jieyang City	Guangdong	16646.7	148.726	0.647156	0.628551	-2.87487	102.423	125.893	0.617001	36.1061	265.039	0.092192	11590	103.549	0.450573	0.439406	-2.47851	102.423	111.369	2.03252	29.5456	245.37	0.0989992	16646.7	148.726	0.647156	0.626376	-3.211	102.423	117.355	1.51619	20.9735	242.268	0.0754492
Meizhou City	Guangdong	11654.4	0	0.262886	0.260433	-0.933103	100.766	138.735	0.437359	24.5164	264.455	0.283411	9289.67	0	0.209546	0.207109	-1.16299	100.766	122.729	1.44074	20.0617	244.998	0.210665	11654.4	0	0.262886	0.259448	-1.30787	100.766	129.326	1.07475	14.2412	245.408	0.187637
Shantou City	Guangdong	1792.23	218.962	0.901905	0.88668	-1.6881	131.775	293.5	0.665899	215.001	640.942	0.379682	1448.57	176.976	0.728963	0.704185	-3.39913	131.775	259.64	2.1936	175.935	569.543	0.167556	1792.23	218.962	0.901905	0.869893	-3.54943	131.775	273.596	1.63635	124.891	531.897	0.149854
Shanwei City	Guangdong	788.753		0.329677	0.328686	-0.300779	52.5482	82.0972	0.499109	49.9827	185.127	0.615466	598.56		0.250182	0.248289	-0.75637	52.5482	72.6257	1.64416	40.9007	167.719	0.22174	788.753		0.329677	0.327235	-0.740876	52.5482	76.5295	1.22649	29.0341	159.338	0.215069
Jiangmen City	Guangdong	34439.6	412.908	0.342359	0.331372	-3.20937	271.702	421.407	0.979305	196.725	890.814	0.277567	28582.5	342.686	0.284135	0.273394	-3.78017	271.702	372.79	3.22602	160.98	808.698	0.213932	34439.6	412.908	0.342359	0.327773	-4.26067	271.702	392.828	2.4065	114.275	781.212	0.183355
Heyuan City	Guangdong	10510.3	5.01402	0.208003	0.206337	-0.801381	83.9343	105.69	0.521179	67.7402	257.886	0.321798	8240.26	3.93106	0.163078	0.161417	-1.01823	83.9343	93.497	1.71686	55.4316	234.58	0.230373	10510.3	5.01402	0.208003	0.205629	-1.14152	83.9343	98.5226	1.28072	39.3492	223.087	0.195431
Shenzhen City	Guangdong	102205	11627.6	1.60212	1.01142	-36.8702	548.611	1465.89	3.11876	1315.77	3333.39	0.0904089	84118.4	9569.95	1.3186	0.841829	-36.1575	548.611	1296.77	10.2738	1076.69	2932.35	0.0810994	102205	11627.6	1.60212	0.957947	-40.2076	548.611	1366.47	7.66391	764.312	2687.06	0.0668297
Qingyuan City	Guangdong	13794.3	27.1274	0.104969	0.104213	-0.721067	138.785	179.574	0.659187	63.3926	382.411	0.530405	10957.4	21.5484	0.0833814	0.0823181	-1.27522	138.785	158.857	2.17149	51.874	351.688	0.275788	13794.3	27.1274	0.104969	0.103555	-1.34744	138.785	167.395	1.61986	36.8237	344.624	0.255775
Zhanjiang City	Guangdong	7101.67	0	0.625415	0.618821	-1.05439	128.435	248.827	0.650126	219.841	597.754	0.56692	5368.62	0	0.472792	0.466126	-1.40994	128.435	220.12	2.14164	179.895	530.593	0.376322	7101.67	0	0.625415	0.615659	-1.55997	128.435	231.952	1.59759	127.702	489.687	0.313907
Chaozhou City	Guangdong	10467.3	14.9034	0.550976	0.533238	-3.21947	41.9433	77.0835	0.670282	38.6878	158.385	0.0491961	7619.73	10.849	0.401084	0.3894	-2.91308	41.9433	68.1905	2.20803	31.6582	144	0.0494322	10467.3	14.9034	0.550976	0.530881	-3.64729	41.9433	71.8558	1.64712	22.4732	137.919	0.0378143
Zhuhai City	Guangdong	14603.6	1336.97	0.43647	0.388918	-10.8946	211.864	316.498	2.46181	195.016	725.839	0.0666236	12969.7	1187.38	0.387634	0.332455	-14.2349	211.864	279.984	8.10965	159.581	659.538	0.0463326	14603.6	1336.97	0.43647	0.368281	-15.623	211.864	295.034	6.04953	113.281	626.229	0.0400839
Zhaoqing City	Guangdong	17446.4	2913.87	0.221944	0.219067	-1.2965	176.732	223.38	0.960788	109.512	510.586	0.393823	13376.4	2234.1	0.170168	0.167189	-1.75045	176.732	197.609	3.16502	89.6134	467.12	0.266859	17446.4	2913.87	0.221944	0.217654	-1.93319	176.732	208.231	2.361	63.6138	450.938	0.233263
Maoming City	Guangdong	5334.84	0	0.693751	0.690224	-0.508453	123.693	110.243	0.796031	67.1862	301.919	0.593799	3451.06	0	0.448782	0.446348	-0.542401	123.693	97.5248	2.62228	54.9783	278.819	0.514046	5334.84	0	0.693751	0.68924	-0.650219	123.693	102.767	1.95613	39.0274	267.444	0.411316
Yangjiang City	Guangdong	12666.6	0	0.278106	0.274254	-1.38519	53.2963	113.066	0.984951	65.5621	232.91	0.168146	9331.13	0	0.204873	0.201713	-1.54251	53.2963	100.022	3.24462	53.6493	210.212	0.136282	12666.6	0	0.278106	0.273106	-1.79791	53.2963	105.398	2.42037	38.084	199.199	0.110796
Shaoguan City	Guangdong	7172.2	40.4985	0.176395	0.175519	-0.496217	97.8447	147.601	0.777396	26.4295	272.652	0.549409	5614.56	31.7031	0.138086	0.136894	-0.862798	97.8447	130.572	2.56089	21.6272	252.605	0.292791	7172.2	40.4985	0.176395	0.174789	-0.909948	97.8447	137.591	1.91034	15.3525	252.698	0.277694
Beihai City	Guangxi	2458.59	40.219	0.419624	0.416666	-0.704774	63.8291	69.8508	0.465846	152.724	286.87	0.407034	2095.43	34.2781	0.35764	0.351867	-1.61422	63.8291	53.9062	12.8787	112.251	242.865	0.150454	2458.59	40.219	0.419624	0.411723	-1.88285	63.8291	64.3709	10.7367	60.0366	198.973	0.105677
Nanning	Guangxi	8172.07	9.2513	0.242053	0.240091	-0.810443	94.2013	49.3238	0.41372	59.637	203.576	0.251192	6130.05	6.93959	0.181569	0.179542	-1.11655	94.2013	38.0648	11.4376	43.8325	187.536	0.167957	8172.07	9.2513	0.242053	0.238844	-1.32583	94.2013	45.4543	9.53534	23.4436	172.635	0.130208
Nanning City	Guangxi	21955.2	0	3.85166	3.79535	-1.46199	35.6589	17.1204	0.41372	42.6537	95.8467	0.0655585	11073.1	0	1.94259	1.92793	-0.754201	35.6589	13.2124	11.4376	31.35	91.6589	0.121529	21955.2	0	3.85166	3.79505	-1.46971	35.6589	15.7773	9.53534	16.7674	77.7389	0.0528942
Liuzhou	Guangxi	4813.17	134.293	0.269293	0.268318	-0.362097	95.7787	56.4775	0.496378	58.895	211.648	0.584468	4227.03	117.939	0.236499	0.234965	-0.648418	95.7787	43.5855	13.7227	43.2872	196.374	0.302867	4813.17	134.293	0.269293	0.267249	-0.758803	95.7787	52.0467	11.4404	23.1519	182.418	0.240396
Liuzhou City	Guangxi	23771.9	0	0.105532	0.104623	-0.860501	82.1023	197.12	0.496378	422.582	702.301	0.816188	20487.5	0	0.090951	0.088996	-2.14951	82.1023	152.124	13.7227	310.593	558.543	0.259846	23771.9	0	0.105532	0.102876	-2.51622	82.1023	181.656	11.4404	166.119	441.317	0.175391
Guilin City	Guangxi	16525.8	0	0.17406	0.173479	-0.333794	147.042	107.422	0.331618	80.3693	335.165	1.00409	11807.5	0	0.124363	0.123661	-0.564555	147.042	82.9013	9.16785	59.0706	298.182	0.52815	16525.8	0	0.17406	0.17293	-0.648686	147.042	98.9949	7.64308	31.5935	285.274	0.439758
Wuzhou City	Guangxi	6208.56	8.08281	0.327347	0.325851	-0.456946	41.479	33.2027	0.304425	44.6973	119.683	0.261919	3976.18	5.17651	0.209644	0.208564	-0.515444	41.479	25.6236	8.41608	32.852	108.371	0.210247	6208.56	8.08281	0.327347	0.325224	-0.648608	41.479	30.5979	7.01635	17.5707	96.6639	0.149032
Hechi City	Guangxi	5049.76	135.366	0.0871419	0.0870009	-0.161805	71.3638	43.5926	0.150433	103.299	218.406	1.35	3766.11	100.956	0.0649904	0.0646635	-0.502997	71.3638	33.6418	4.15885	75.9237	185.088	0.367952	5049.76	135.366	0.0871419	0.086664	-0.548416	71.3638	40.1727	3.46717	40.6073	155.611	0.283767
Yulin City	Guangxi	5260.56	42.1431	0.383801	0.382115	-0.439264	54.3736	101.831	0.214541	233.266	389.684	0.887168	3922.12	31.4207	0.286151	0.283643	-0.876356	54.3736	78.5861	5.93116	171.448	310.339	0.35413	5260.56	42.1431	0.383801	0.379989	-0.993328	54.3736	93.842	4.94471	91.6977	244.858	0.246503
Baise City	Guangxi	9237.37	204.868	0.196543	0.195577	-0.491446	100.86	73.1319	0.230722	49.0569	223.28	0.454315	6958.41	154.325	0.148053	0.146781	-0.859352	100.86	56.4383	6.3785	36.0563	199.733	0.232422	9237.37	204.868	0.196543	0.194596	-0.990421	100.86	67.3946	5.31765	19.2845	192.857	0.194718
Guigang City	Guangxi	6164.95	2.14693	0.554108	0.55059	-0.63502	73.2256	59.5476	0.170662	56.7944	189.738	0.298791	4577.54	1.59412	0.411431	0.408326	-0.754755	73.2256	45.9549	4.71808	41.7433	165.642	0.219468	6164.95	2.14693	0.554108	0.549016	-0.91899	73.2256	54.876	3.93338	22.3261	154.361	0.167968
Hezhou City	Guangxi	3297.97	0	0.204056	0.203602	-0.22239	35.6693	28.9869	0.195435	17.8773	82.7289	0.371999	2401.96	0	0.148617	0.148013	-0.406414	35.6693	22.3701	5.40294	13.1396	76.582	0.18846	3297.97	0	0.204056	0.20311	-0.463305	35.6693	26.7128	4.50434	7.02763	73.9141	0.159531
Qinzhou City	Guangxi	8627.53	32.8018	0.363819	0.360337	-0.957288	95.6783	50.303	0.249247	101.829	248.059	0.259128	6109.15	23.2269	0.25762	0.254807	-1.09203	95.6783	38.8205	6.89063	74.8431	216.232	0.198015	8627.53	32.8018	0.363819	0.358903	-1.35128	95.6783	46.3566	5.7446	40.0293	187.809	0.138987
Fangchenggang City	Guangxi	2374.01	0	0.131333	0.130922	-0.312792	35.6786	29.4539	0.573133	24.4139	90.1195	0.288074	1882.84	0	0.104161	0.103211	-0.91157	35.6786	22.7305	15.8447	17.9439	92.1978	0.10114	2374.01	0	0.131333	0.129983	-1.02807	35.6786	27.1432	13.2095	9.59721	85.6284	0.0832869
Liupanshui City	Guizhou	8560.01	3391.32	0.19307	0.191324	-0.90449	86.1473	61.1282	3.543	91.5011	242.32	0.267915	5727.97	2269.32	0.129194	0.127497	-1.31314	86.1473	47.8507	19.0553	68.5594	221.613	0.168765	8560.01	3391.32	0.19307	0.190188	-1.49288	86.1473	55.5509	15.5729	47.1329	204.404	0.136923
Anshun City	Guizhou	6134.89	1180	0.275679	0.273079	-0.942946	41.4611	37.9362	2.30408	59.8394	141.541	0.15011	4233.94	814.364	0.190257	0.188157	-1.10377	41.4611	29.6962	12.392	44.8361	128.386	0.116316	6134.89	1180	0.275679	0.272004	-1.33315	41.4611	34.4749	10.1274	30.8237	116.887	0.0876793
Bijie City	Guizhou	4758.6	0	0.19437	0.193393	-0.502393	108.728	90.692	1.89247	343.967	545.28	1.0854	3298.58	0	0.134734	0.133143	-1.1807	108.728	70.9931	10.1783	257.726	447.625	0.379132	4758.6	0	0.19437	0.191985	-1.22684	108.728	82.4174	8.31819	177.18	376.644	0.307004
Guiyang City	Guizhou	30679.5	0	0.286705	0.267084	-6.84365	233.902	351.433	5.36353	740.755	1331.45	0.194553	26697.8	0	0.249495	0.22427	-10.1106	233.902	275.099	28.8467	555.029	1092.88	0.108093	30679.5	0	0.286705	0.253426	-11.6073	233.902	319.368	23.5749	381.569	958.415	0.0825696
Zunyi City	Guizhou	18216.4	0	0.292227	0.288256	-1.35877	124.344	174.124	2.99007	296.372	597.829	0.439976	13276.9	0	0.212989	0.209046	-1.85108	124.344	136.303	16.0815	222.064	498.792	0.269459	18216.4	0	0.292227	0.28594	-2.15134	124.344	158.237	13.1426	152.663	448.387	0.208422
Tongren City	Guizhou	3869.7	0	0.257441	0.256484	-0.371581	69.6891	24.1832	2.10377	91.779	187.755	0.505274	2362.36	0	0.157161	0.156457	-0.448202	69.6891	18.9304	11.3147	68.7677	168.702	0.376401	3869.7	0	0.257441	0.256058	-0.536978	69.6891	21.9767	9.24692	47.2761	148.189	0.275972
Southeast Guizhou Miao & Dong A.P	Guizhou	10289.2	0	0.0913123	0.0908588	-0.496647	149.524	78.7364	1.9845	158.176	388.421	0.782185	7746.85	0	0.0687499	0.0680393	-1.0336	149.524	61.6343	10.6732	118.517	340.349	0.329271	10289.2	0	0.0913123	0.0902778	-1.13293	149.524	71.5526	8.72269	81.4776	311.277	0.274752
South Guizhou Buyi & Miao A.P	Guizhou	5422.48	0	0.105123	0.104746	-0.358627	41.0519	69.9491	2.37414	149.349	262.724	0.732584	3918.87	0	0.0759736	0.0752736	-0.921373	41.0519	54.7557	12.7689	111.903	220.48	0.239296	5422.48	0	0.105123	0.104108	-0.965724	41.0519	63.567	10.4353	76.9308	191.985	0.198803
Southwest Guizhou Buyi & Miao A.P	Guizhou	5654.12	0	0.154415	0.153449	-0.625457	52.0457	44.2955	2.42318	103.701	202.465	0.323706	3833.36	0	0.10469	0.103584	-1.05579	52.0457	34.6742	13.0326	77.7005	177.453	0.168076	5654.12	0	0.154415	0.152624	-1.16005	52.0457	40.254	10.6509	53.4172	156.368	0.1348
Wanning City	Hainan	651.331	280.544				12.4964	13.2785	2.16943	3.16668	31.1111		473.445	203.924				12.4964	10.535	7.75085	2.37789	33.1601		651.331	280.544				12.4964	11.2621	6.40743	1.5142	31.6802
Sanya City	Hainan	0	1087.65	0.117944	0.113257	-3.97441	62.9528	69.4261	4.30265	41.3612	178.043	0.0447972	0	973.24	0.105538	0.090465	-14.2821	62.9528	55.0815	15.3724	31.0586	164.465	0.0115155	0	1087.65	0.117944	0.0975242	-17.3135	62.9528	58.8834	12.7079	19.7775	154.322	0.0089134
Sansha City	Hainan	0					15.9245	1.00241	0	0	16.927		0					15.9245	0.795294	0	0	16.7198		0					15.9245	0.850187	0	0	16.7747
Dongfang City	Hainan	0					13.6575	0	2.54223	0.124984	16.3247		0					13.6575	0	9.0828	0.0938519	22.8342		0					13.6575	0	7.50852	0.0597631	21.2258
Lingao County	Hainan	1225.85					1.05735	4.95914	2.41029	0	8.42678		763.11					1.05735	3.9345	8.61139	0	13.6032		1225.85					1.05735	4.20607	7.11881	0	12.3822
Ledong Li Autonomous County	Hainan	923.51	0				3.94393	4.1755	1.63031	0.0626711	9.81241		588.973	0				3.94393	3.31277	5.82471	0.0470604	13.1285		923.51	0				3.94393	3.54142	4.81514	0.0299672	12.3305
Wuzhishan City	Hainan	464.54	0				8.80467	4.59985	1.5562	0	14.9607		393.119	0				8.80467	3.64945	5.55995	0	18.0141		464.54	0				8.80467	3.90134	4.59627	0	17.3023
Baoting Li & Miao Autonomous County	Hainan	400.762	0				4.2911	2.37114	1.89317	0.184289	8.73969		277.198	0				4.2911	1.88122	6.76385	0.138384	13.0746		400.762	0				4.2911	2.01107	5.59151	0.0881205	11.9818
Danzhou City	Hainan	2369.77					8.73023	13.7068	3.35018	1.90735	27.6946		1627.11					8.73023	10.8748	11.9694	1.43225	33.0067		2369.77					8.73023	11.6254	9.89479	0.912029	31.1624
Dingan County	Hainan	0					11.4547	0	1.90149	0.379608	13.7358		0					11.4547	0	6.79356	0.285052	18.5333		0					11.4547	0	5.61607	0.181515	17.2523
Tunchang County	Hainan	536.805	0				3.51042	2.63504	1.62803	0.644617	8.4181		350.408	0				3.51042	2.0906	5.81656	0.48405	11.9016		536.805	0				3.51042	2.23489	4.8084	0.308233	10.8619
Wenchang City	Hainan	1814.49	0				6.68228	12.3988	2.2581	1.58021	22.9194		1296.7	0				6.68228	9.83703	8.06767	1.18659	25.7736		1814.49	0				6.68228	10.516	6.66934	0.7556	24.6232
Chartgjiang Li Autonomous County	Hainan	1221.2	0				9.13651	9.45026	2.90518	0.526258	22.0182		932.925	0				9.13651	7.49768	10.3795	0.395173	27.4089		1221.2	0				9.13651	8.01519	8.58048	0.251638	25.9838
Haikou City	Hainan	376.175	20.4969				99.0984	111.252	3.86597	87.975	302.192		282.888	15.4139				99.0984	88.2658	13.8122	66.0614	267.238		376.175	20.4969				99.0984	94.3581	11.4182	42.0666	246.941
Chengmai County	Hainan	0	55.7165				17.5873	9.51724	3.67243	2.47282	33.2498		0	35.5533				17.5873	7.55082	13.1207	1.85687	40.1157		0	55.7165				17.5873	8.072	10.8466	1.18242	37.6883
Qiongzhong Li & Miao Autonomous County	Hainan	434.653					3.07602	2.79449	1.62869	0.269217	7.76842		309.333					3.07602	2.21711	5.81892	0.202158	11.3142		434.653					3.07602	2.37013	4.81036	0.12873	10.3852
Qionghai City	Hainan	2116.64					0.352713	12.6835	2.94676	1.57215	17.5551		1474.61					0.352713	10.0629	10.5281	1.18054	22.1242		2116.64					0.352713	10.7574	8.70328	0.751747	20.5652
Baisha Li Autonomous County	Hainan	0					0.492551	2.06048	1.72384	0	4.27687		0					0.492551	1.63475	6.15888	0	8.28618		0					0.492551	1.74758	5.09139	0	7.33152
Lingshui Li Autonomous County	Hainan	0	0				5.50353	4.94256	2.63908	0.0673267	13.1525		0	0				5.50353	3.92135	9.4288	0.0505563	18.9042		0	0				5.50353	4.19201	7.79455	0.0321933	17.5223
Baoding City	Hebei	14531.3	2356.89	0.111736	0.0641826	-42.5587	559.525	392.608	2.96218	877.143	1832.24	0.043052	12018.4	1949.32	0.0924139	0.0471565	-48.9725	559.525	324.332	3.24241	701.685	1588.78	0.0324424	14531.3	2356.89	0.111736	0.0547636	-50.9884	559.525	384.039	2.47344	559.93	1505.97	0.0295355
Tangshan City	Hebei	29649.5	12315.4	0.788651	0.622885	-21.019	529.344	344.973	6.47943	1002.44	1883.24	0.0895972	24218	10059.3	0.644177	0.51598	-19.9008	529.344	284.981	7.09239	801.919	1623.34	0.0815714	29649.5	12315.4	0.788651	0.612708	-22.3094	529.344	337.444	5.41035	639.915	1512.11	0.0677793
Langfang City	Hebei	15287.4	1781.87	0.475537	0.331041	-30.386	248.531	157.047	7.1297	338.112	750.819	0.0247094	12697.4	1479.98	0.39497	0.276551	-29.9819	248.531	129.736	7.80417	270.478	656.548	0.0218981	15287.4	1781.87	0.475537	0.319474	-32.8182	248.531	153.619	5.95334	215.836	623.939	0.019012
Zhangjiakou City	Hebei	11623.1	710.614	0.158474	0.12652	-20.1633	249.792	143.712	2.54886	285.474	681.527	0.0338004	9302.22	568.72	0.12683	0.0987495	-22.1403	249.792	118.72	2.78998	228.37	599.672	0.0270851	11623.1	710.614	0.158474	0.121665	-23.2268	249.792	140.576	2.12831	182.234	574.73	0.0247443
Chengde City	Hebei	5265.46	1868.99	0.120298	0.0988	-17.8706	214.36	114.115	3.18235	156.221	487.879	0.0273007	4065.29	1442.99	0.0928781	0.0730978	-21.2971	214.36	94.27	3.48341	124.972	437.085	0.0205234	5265.46	1868.99	0.120298	0.0947427	-21.2433	214.36	111.624	2.65728	99.7247	428.367	0.0201648
Cangzhou City	Hebei	21412.7	3213.63	0.0876675	0.0526323	-39.9637	321.581	178.138	7.86708	250.306	757.892	0.0189645	17353.6	2604.43	0.0710487	0.0392736	-44.723	321.581	147.159	8.61131	200.236	677.588	0.0151508	21412.7	3213.63	0.0876675	0.0469626	-46.431	321.581	174.25	6.56905	159.784	662.185	0.0142617
Shyiazhuang City	Hebei	44690.6	17893.7	1.30815	0.905765	-30.7601	594.54	467.391	4.23554	1186.62	2252.78	0.0732372	34638.1	13868.7	1.0139	0.73048	-27.9537	594.54	386.11	4.63622	949.254	1934.54	0.0692051	44690.6	17893.7	1.30815	0.890528	-31.9249	594.54	457.19	3.53669	757.485	1812.75	0.0567817
Qinhuangdao City	Hebei	6890.72	2847.25	0.598286	0.516904	-13.6024	174.495	177.495	4.38529	339.447	695.822	0.0511543	5765.37	2382.25	0.500578	0.430954	-13.9086	174.495	146.628	4.80015	271.546	597.469	0.0429569	6890.72	2847.25	0.598286	0.507239	-15.2179	174.495	173.621	3.66174	216.688	568.466	0.0373551
Hengshui City	Hebei	4915.21	2046.27	0.16777	0.103898	-38.0712	220.368	128.786	3.99528	192.147	545.296	0.014323	3937.94	1639.42	0.134413	0.0751084	-44.1213	220.368	106.389	4.37324	153.711	484.841	0.0109888	4915.21	2046.27	0.16777	0.0921766	-45.0579	220.368	125.975	3.33608	122.658	472.337	0.0104829
Xingtai City	Hebei	6167.58	2570.72	0.451883	0.353534	-21.7642	250.728	176.682	2.00471	258.157	687.572	0.0315919	4895.89	2040.67	0.358709	0.274023	-23.6087	250.728	145.956	2.19435	206.517	605.395	0.0256429	6167.58	2570.72	0.451883	0.33969	-24.8278	250.728	172.826	1.67394	164.796	590.024	0.0237646
Handan City	Hebei	6951.76	16112	0.413376	0.296219	-28.3416	281.792	243.501	2.76457	390.573	918.629	0.0324128	5292.73	12266.9	0.314724	0.212522	-32.4737	281.792	201.155	3.0261	312.445	798.417	0.0245866	6951.76	16112	0.413376	0.27792	-32.7682	281.792	238.186	2.30843	249.325	771.611	0.0235475
Sanmenxia City	Henan	9247.12	79.2135	0.375576	0.347002	-7.60809	39.6331	224.992	30.6482	165.812	461.086	0.0606044	7707.42	66.024	0.313041	0.287452	-8.17427	39.6331	187.431	49.9761	127.884	404.924	0.0495363	9247.12	79.2135	0.375576	0.340566	-9.32189	39.6331	210.411	39.593	92.6891	382.326	0.0410137
Xinyang City	Henan	21194.7	0	0.428709	0.415635	-3.04967	63.4161	288.995	16.5991	214.881	583.892	0.19146	15179.8	0	0.307045	0.298529	-2.77337	63.4161	240.749	27.0672	165.728	496.961	0.179191	21194.7	0	0.428709	0.413979	-3.43585	63.4161	270.266	21.4437	120.119	475.244	0.138319
Nanyang City	Henan	24882.1	0	1.2627	1.18034	-6.52314	97.7156	441.879	15.7713	234.798	790.164	0.121133	17825.8	0	0.904615	0.856233	-5.34841	97.7156	368.11	25.7173	181.09	672.633	0.125763	24882.1	0	1.2627	1.17534	-6.91927	97.7156	413.242	20.3742	131.252	662.584	0.0957591
Zhoukou City	Henan	25207.3	0	1.84581	1.61844	-12.3182	66.7493	368.807	13.0605	289.505	738.121	0.0599213	18517.5	0	1.35595	1.22079	-9.96828	66.7493	307.237	21.2969	223.282	618.565	0.0620537	25207.3	0	1.84581	1.61042	-12.7526	66.7493	344.905	16.8722	161.833	590.36	0.0462936
Shangqiu City	Henan	19932.2	1289.28	1.57937	1.39564	-11.633	97.7738	401.853	13.7276	287.592	800.947	0.0688508	15250.4	986.445	1.2084	1.08782	-9.97832	97.7738	334.766	22.3847	221.807	676.732	0.0678204	19932.2	1289.28	1.57937	1.38545	-12.2783	97.7738	375.81	17.734	160.764	652.082	0.0531084
Anyang City	Henan	5359.23	2615.49	3.57893	3.36042	-6.10546	73.5699	266.34	20.271	323.406	683.587	0.111963	3785.28	1847.35	2.52783	2.4027	-4.95025	73.5699	221.876	33.0547	249.428	577.929	0.116747	5359.23	2615.49	3.57893	3.3473	-6.47189	73.5699	249.079	26.1872	180.784	529.62	0.0818342
Pingdingshan City	Henan	13237.5	630.326	2.01174	1.7555	-12.7374	58.2039	393.544	18.7056	241.607	712.061	0.055903	10210.3	486.181	1.55169	1.37886	-11.1385	58.2039	327.844	30.5021	186.341	602.891	0.0541267	13237.5	630.326	2.01174	1.7392	-13.5475	58.2039	368.039	24.1649	135.059	585.466	0.0432158
Kaifeng City	Henan	20370.2	523.455	2.70814	2.20664	-18.5183	67.5124	359.032	19.4443	270.768	716.757	0.0387053	15628.2	401.6	2.07771	1.75486	-15.5389	67.5124	299.094	31.7066	208.832	607.144	0.0390726	20370.2	523.455	2.70814	2.19202	-19.0582	67.5124	335.764	25.1192	151.36	579.755	0.0304203
Xinxiang City	Henan	21664.9	1840.32	2.5323	2.11166	-16.6108	113.587	504.241	18.9016	433.084	1069.81	0.0644045	16994.9	1443.62	1.98644	1.70178	-14.3302	113.587	420.061	30.8216	334.019	898.488	0.0626988	21664.9	1840.32	2.5323	2.09457	-17.2858	113.587	471.562	24.4181	242.094	851.661	0.0492694
Luoyang City	Henan	43414.2	6316.1	1.55931	1.22668	-21.3315	125.983	676.188	28.4525	601.215	1431.84	0.067123	32520.8	4731.28	1.16805	0.955958	-18.1579	125.983	563.302	46.3958	463.69	1199.37	0.0660525	43414.2	6316.1	1.55931	1.21205	-22.2699	125.983	632.365	36.7565	336.079	1131.18	0.0507944
Luohe City	Henan	14789.6	932.212	1.21806	0.889427	-26.9799	65.7704	336.988	20.909	254.205	677.873	0.0251251	12125.3	764.274	0.998624	0.743604	-25.5371	65.7704	280.731	34.095	196.057	576.653	0.022581	14789.6	932.212	1.21806	0.863456	-29.112	65.7704	315.149	27.0113	142.101	550.032	0.0188936
Puyang City	Henan	15611.8	716.626	6.09989	4.43819	-27.2416	95.437	303.298	20.2787	241.838	660.852	0.024259	12020.6	551.781	4.69674	3.62203	-22.8819	95.437	252.664	33.0673	186.519	567.688	0.0248094	15611.8	716.626	6.09989	4.41408	-27.6367	95.437	283.642	26.1972	135.188	540.463	0.019556
Jiaozuo City	Henan	22083.7	4389.4	2.09199	1.56384	-25.2464	255.102	1006.33	30.0477	766.781	2058.26	0.0815269	20496.6	4073.93	1.94164	1.44651	-25.5004	255.102	838.332	48.9969	591.384	1733.82	0.0679915	22083.7	4389.4	2.09199	1.51592	-27.5368	255.102	941.114	38.8172	428.631	1663.66	0.060416
Xuchang City	Henan	19739.2	821.604	2.07114	1.63383	-21.1144	96.7835	372.273	27.6104	267.173	763.84	0.0361763	14448.1	601.374	1.51597	1.24913	-17.6023	96.7835	310.125	45.0226	206.059	657.99	0.0373809	19739.2	821.604	2.07114	1.61622	-21.9647	96.7835	348.147	35.6686	149.35	629.949	0.0286801
Zhengzhou City	Henan	24467.3	12830.9	3.5812	2.79331	-22.0008	225.27	734.573	42.4812	578.822	1581.14	0.0718676	18605	9756.63	2.72316	2.213	-18.734	225.27	611.941	69.2715	446.419	1352.9	0.0722165	24467.3	12830.9	3.5812	2.76399	-22.8194	225.27	686.967	54.8795	323.562	1290.68	0.0565604
Zhumadian City	Henan	19987	2816.83	0.851386	0.781498	-8.20874	79.748	327.721	14.862	242.046	664.377	0.0809352	14755.6	2079.55	0.628545	0.583799	-7.11887	79.748	273.01	24.2346	186.679	563.672	0.0791799	19987	2816.83	0.851386	0.775826	-8.87491	79.748	306.482	19.1995	135.304	540.733	0.0609283
Hebi City	Henan	8058.01	118.572	3.86741	2.83086	-26.8022	65.3712	162.867	24.6469	124.792	377.677	0.0140913	6198.83	91.2144	2.9751	2.29723	-22.7846	65.3712	135.677	40.1902	96.2468	337.486	0.014812	8058.01	118.572	3.86741	2.80643	-27.4337	65.3712	152.312	31.8402	69.759	319.282	0.0116383
Qitaihe City	Heilongjiang	0	0	0.108938	0.108789	-0.13705	31.3109	51.3214	5.35412	37.4302	125.417	0.914784	0	0	0.08638	0.08305	-3.85506	31.3109	42.1973	132.642	28.5913	234.742	0.0608926	0	0	0.108938	0.104579	-4.00217	31.3109	44.1017	105.972	18.6186	200.003	0.0499737
Yichun City	Heilongjiang	0		0.0086377	0.0086173	-0.236174	60.8364	67.7127	4.40292	50.3186	183.271	0.776574	0		0.0069816	0.0065271	-6.50997	60.8364	55.6744	109.077	38.4363	264.024	0.0405568	0		0.0086377	0.0080426	-6.88957	60.8364	58.1871	87.1453	25.0297	231.198	0.0335591
Jiamusi City	Heilongjiang	10350.7	0	0.0219604	0.0214545	-2.30369	90.4731	144.895	7.5641	75.2914	318.224	0.138145	7812.82	0	0.016576	0.0147974	-10.73	90.4731	119.135	187.392	57.5119	454.512	0.0423581	10350.7	0	0.0219604	0.0195318	-11.059	90.4731	124.512	149.713	37.4517	402.15	0.0363645
Shuangyashan City	Heilongjiang	3937.94	0	0.0144859	0.0143218	-1.13283	44.8307	55.1665	6.30467	94.5957	200.898	0.1774	2788.51	0	0.0102577	0.0094897	-7.48706	44.8307	45.3587	156.191	72.2576	318.638	0.0425625	3937.94	0	0.0144859	0.0134375	-7.23738	44.8307	47.4059	124.786	47.0541	264.077	0.0364904
Harbin City	Heilongjiang	29073.4	0	0.0550483	0.0535008	-2.81117	447.05	695.458	12.7317	851.228	2006.47	0.713752	23294.4	0	0.0441063	0.0398737	-9.59636	447.05	571.816	315.412	650.217	1984.5	0.206799	29073.4	0	0.0550483	0.0493116	-10.4212	447.05	597.624	251.993	423.421	1720.09	0.165055
Daxing'anling Prefecture	Heilongjiang	1221.48	0				29.5979	40.1808	5.99969	34.3573	110.136		1000.18	0				29.5979	33.0373	148.636	26.2441	237.515		1221.48	0				29.5979	34.5283	118.749	17.0901	199.966
Daqing City	Heilongjiang	13928.1	540.877	0.276056	0.257186	-6.83582	235.151	245.114	23.7509	169.386	673.402	0.0985112	10457.1	406.086	0.207261	0.190042	-8.3078	235.151	201.537	588.402	129.387	1154.48	0.138963	13928.1	540.877	0.276056	0.249022	-9.79293	235.151	210.633	470.093	84.2565	1000.13	0.102128
Mudanjiang City	Heilongjiang	3777.16	0	0.0515873	0.0513109	-0.535791	117.647	205.654	9.66278	255.372	588.337	1.09798	2785.16	0	0.0380388	0.0366538	-3.64102	117.647	169.092	239.385	195.068	721.192	0.198073	3777.16	0	0.0515873	0.0497126	-3.63403	117.647	176.724	191.252	127.028	612.651	0.16859
Suihua City	Heilongjiang	12688.3	0	0.0160272	0.0155656	-2.8801	134.973	179.664	4.9814	268.813	588.432	0.204308	9161.32	0	0.0115721	0.0095328	-17.6226	134.973	147.723	123.409	205.335	611.44	0.0346963	12688.3	0	0.0160272	0.0132542	-17.3018	134.973	154.39	98.595	133.714	521.672	0.0301515
Jixi City	Heilongjiang	1004.93		0.0258609	0.0257402	-0.466728	77.8384	94.7755	6.08726	124.052	302.754	0.648267	761.34		0.0195923	0.0182857	-6.66895	77.8384	77.9259	150.805	94.7584	401.328	0.060179	1004.93		0.0258609	0.0241354	-6.67223	77.8384	81.4429	120.483	61.7066	341.471	0.0511762
Hegang City	Heilongjiang	4267.09	0	0.0184102	0.018123	-1.56	59.8759	76.0089	5.3882	57.7107	198.984	0.127569	3474.12	0	0.0149889	0.0136071	-9.21882	59.8759	62.4956	133.487	44.0827	299.941	0.0325342	4267.09	0	0.0184102	0.0165745	-9.9711	59.8759	65.3162	106.647	28.7066	260.545	0.0261299
Heihe City	Heilongjiang	3154.67		0.0023069	0.0022729	-1.47384	100.995	82.1322	5.73201	111.248	300.106	0.203523	2388.29		0.0017465	0.0011841	-32.2015	100.995	67.5303	142.004	84.9773	395.506	0.0122821	3154.67		0.0023069	0.001569	-31.9866	100.995	70.5781	113.451	55.3372	340.361	0.0106408
Qiqihar City	Heilongjiang	11035.4	0	0.0424871	0.0413866	-2.5902	138.043	184.621	5.26935	217.297	545.23	0.210491	8010.35	0	0.0308406	0.0281396	-8.75794	138.043	151.798	130.542	165.984	586.367	0.0669533	11035.4	0	0.0424871	0.0386623	-9.00226	138.043	158.649	104.294	108.089	509.075	0.0565496
Shiyan City	Hubei	21727.5	9.49515	0.233943	0.226108	-3.34911	118.495	176.827	0.92161	210.085	506.329	0.151184	17824.4	7.78946	0.191918	0.181794	-5.27518	118.495	145.721	19.4792	164.112	447.808	0.0848899	21727.5	9.49515	0.233943	0.220008	-5.95633	118.495	170.505	15.2182	101.672	405.89	0.0681442
Xianning City	Hubei	9301.93	0	0.286459	0.283907	-0.890705	66.6842	67.0804	0.988829	58.267	193.02	0.216705	6747.52	0	0.207794	0.205296	-1.20191	66.6842	55.2801	20.8999	45.5165	188.381	0.156736	9301.93	0	0.286459	0.282456	-1.39713	66.6842	64.6819	16.3282	28.1988	175.893	0.125894
Xiaogan City	Hubei	15832.1	1326.68	1.13267	1.09382	-3.4296	144.334	129.197	0.717605	141.973	416.221	0.121363	12117.6	1015.42	0.866925	0.838867	-3.23656	144.334	106.469	15.1673	110.905	376.876	0.116443	15832.1	1326.68	1.13267	1.08739	-3.99755	144.334	124.577	11.8496	68.7089	349.47	0.087422
Yichang City	Hubei	9780.76	0	0.265388	0.262716	-1.00683	142.542	186.908	1.97507	188.386	519.811	0.516283	7843.57	0	0.212825	0.207825	-2.34902	142.542	154.028	41.7451	147.162	485.478	0.206671	9780.76	0	0.265388	0.258559	-2.57333	142.542	180.225	32.6136	91.171	446.551	0.17353
Enshi Tujia & Miao A.P	Hubei	6079.5	1.587	0.0438375	0.0436388	-0.453265	98.3549	66.6966	0	75.1413	240.193	0.530037	5280.21	1.37835	0.038074	0.0372024	-2.28923	98.3549	54.9638	0	58.6982	212.017	0.0926196	6079.5	1.587	0.0438375	0.0427167	-2.55672	98.3549	64.3118	0	36.3652	199.032	0.0778471
Wuhan City	Hubei	68890.7	553.611	0.964413	0.867138	-10.0864	580.328	606.724	2.49718	1099.24	2288.79	0.226919	55310.6	444.48	0.774302	0.693979	-10.3736	580.328	499.993	52.7805	858.694	1991.8	0.192006	68890.7	553.611	0.964413	0.846758	-12.1996	580.328	585.03	41.2351	531.985	1738.58	0.142512
Administrative units directly under the Jurisdiction	Hubei	3337.32	0	0.611848	0.608445	-0.556249	92.3633	100.845	0	62.3933	255.601	0.459513	2726.53	0	0.49987	0.494677	-1.03869	92.3633	83.1047	0	48.7399	224.208	0.215859	3337.32	0	0.611848	0.604735	-1.16253	92.3633	97.2388	0	30.1957	219.798	0.189068
Jingzhou City	Hubei	14203.4	0.590104	0.582551	0.574646	-1.35696	85.8215	148.355	0.668468	135.734	370.579	0.273092	10966	0.455601	0.44977	0.442492	-1.61812	85.8215	122.258	14.1288	106.031	328.239	0.202853	14203.4	0.590104	0.582551	0.571422	-1.91037	85.8215	143.051	11.0382	65.6893	305.6	0.159969
Jingmen City	Hubei	10318.2	0	1.04908	1.02372	-2.41754	52.2085	94.8103	1.15108	95.7763	243.946	0.100909	7549.8	0	0.767612	0.749884	-2.30945	52.2085	78.132	24.3294	74.8177	229.488	0.0993689	10318.2	0	1.04908	1.01862	-2.90349	52.2085	91.4203	19.0075	46.3517	208.988	0.0719789
Xiangyang City	Hubei	14238.9	45.3662	1.44726	1.40151	-3.16115	83.6018	124.983	1.4465	269.907	479.939	0.151823	10672.3	34.003	1.08475	1.05376	-2.85706	83.6018	102.997	30.5734	210.844	428.016	0.149807	14238.9	45.3662	1.44726	1.39512	-3.60233	83.6018	120.514	23.8856	130.624	358.625	0.0995532
Ezhou City	Hubei	610.569		1.53568	1.52807	-0.495806	29.8915	47.394	1.65279	61.0183	139.957	0.282267	501.737		1.26195	1.25013	-0.936408	29.8915	39.0568	34.9334	47.6658	151.548	0.161838	610.569		1.53568	1.51958	-1.04833	29.8915	45.6994	27.2919	29.5303	132.413	0.126308
Suizhou City	Hubei	7147.04		0.790577	0.769161	-2.70891	23.5232	43.4775	0.860915	37.5299	105.391	0.0389055	5030.78		0.556484	0.542761	-2.46613	23.5232	35.8292	18.1963	29.3173	106.866	0.0433337	7147.04		0.790577	0.765375	-3.1878	23.5232	41.9229	14.216	18.1629	97.825	0.0306873
Huanggang City	Hubei	8465.87	68.1117	0.434974	0.432219	-0.633302	77.7176	108.039	0.605806	88.8869	275.25	0.434628	6178.96	49.7125	0.317473	0.314562	-0.917148	77.7176	89.0338	12.8043	69.4359	248.992	0.271489	8465.87	68.1117	0.434974	0.430401	-1.05128	77.7176	104.176	10.0035	43.0175	234.915	0.223457
Huangshi City	Hubei	15189.9	19.8473	0.879135	0.845625	-3.81165	68.7405	100.695	1.20032	100.586	271.222	0.0711562	11485.1	15.0066	0.664715	0.64075	-3.60531	68.7405	82.9814	25.3699	78.5751	255.667	0.0709141	15189.9	19.8473	0.879135	0.839819	-4.47207	68.7405	97.0946	19.8204	48.6795	234.335	0.0523997
Loudi City	Hunan	16378.2	71.3903	0.373875	0.366234	-2.04373	123.077	124.252	1.89366	214.679	463.902	0.226987	12294.8	53.5917	0.280663	0.274699	-2.12479	123.077	101.587	259.375	164.862	648.901	0.305395	16378.2	71.3903	0.373875	0.364106	-2.61293	123.077	111.736	207.317	111.69	553.82	0.211955
Yueyang City	Hunan	18074.4	0	0.642801	0.634178	-1.34149	145.264	174.911	2.912	311.974	635.061	0.473399	12458.3	0	0.443067	0.437584	-1.23767	145.264	143.004	398.858	239.58	926.706	0.748742	18074.4	0	0.642801	0.632395	-1.61881	145.264	157.292	318.805	162.31	783.67	0.484103
Changde City	Hunan	22014.1	73.3309	0.645828	0.635493	-1.60033	102.806	172.368	2.6277	228.8	506.602	0.316559	15315.1	51.016	0.4493	0.44295	-1.41333	102.806	140.925	359.918	175.707	779.356	0.551432	22014.1	73.3309	0.645828	0.633772	-1.86683	102.806	155.005	287.68	119.037	664.528	0.355965
Zhangjiajie City	Hunan	941.922	0	0.107595	0.107478	-0.10902	35.8828	42.4695	1.6661	60.9783	140.997	1.29403	704.259	0	0.0804472	0.0798829	-0.701454	35.8828	34.7223	228.206	46.8281	345.639	0.49276	941.922	0	0.107595	0.106826	-0.714993	35.8828	38.1915	182.403	31.7249	288.203	0.403106
Huaihua City	Hunan	14306.8	0	0.142204	0.141338	-0.609196	108.209	119.396	1.47556	134.016	363.097	0.596032	10674.9	0	0.106104	0.105088	-0.957272	108.209	97.6163	202.109	102.917	510.852	0.533653	14306.8	0	0.142204	0.140642	-1.09828	108.209	107.369	161.544	69.724	446.847	0.406862
Zhuzhou City	Hunan	20373	0	0.255589	0.251218	-1.71017	262.796	259.855	3.32149	397.028	923	0.539711	17512.6	0	0.219704	0.214181	-2.51397	262.796	212.453	454.946	304.896	1235.09	0.491291	20373	0	0.255589	0.248232	-2.87861	262.796	233.679	363.635	206.56	1066.67	0.370553
Yongzhou City	Hunan	9517.03	0	0.184392	0.183692	-0.37941	117.639	141.68	1.48474	189.504	450.307	1.18675	7181.6	0	0.139143	0.138154	-0.710852	117.639	115.835	203.365	145.529	582.368	0.819258	9517.03	0	0.184392	0.182921	-0.797758	117.639	127.408	162.548	98.5924	506.188	0.63452
Xiangtan City	Hunan	18642.6	66.9544	0.676718	0.646	-4.53933	100.474	198.362	3.42165	256.62	558.877	0.123119	16112.4	57.8674	0.584874	0.556691	-4.81866	100.474	162.177	468.666	197.071	928.387	0.192665	18642.6	66.9544	0.676718	0.639368	-5.51934	100.474	178.38	374.601	133.511	786.966	0.142583
West Hunan Tujia & Miao A.P	Hunan	5254.41	0	0.0903199	0.0899338	-0.427481	60.6278	86.3855	0	139.199	286.212	0.669488	4732.89	0	0.0813553	0.0803155	-1.2781	60.6278	70.6273	0	106.898	238.153	0.186328	5254.41	0	0.0903199	0.0889823	-1.48096	60.6278	77.6837	0	72.4206	210.732	0.142291
Yiyang City	Hunan	16219	0	0.410917	0.404355	-1.59679	70.4082	114.772	1.74259	246.462	433.385	0.271409	11880.9	0	0.301009	0.296281	-1.57058	70.4082	93.8359	238.684	189.27	592.198	0.377058	16219	0	0.410917	0.402804	-1.97432	70.4082	103.211	190.778	128.226	492.623	0.249515
Hengyang City	Hunan	11448.8	0	0.610571	0.604755	-0.952616	223.421	178.221	2.01222	302.304	705.958	0.741073	8077.62	0	0.430784	0.426319	-1.03634	223.421	145.71	275.615	232.154	876.9	0.846156	11448.8	0	0.610571	0.602721	-1.28581	223.421	160.268	220.298	157.279	761.265	0.592048
Shaoyang City	Hunan	13653	0	0.264858	0.262852	-0.757613	114.366	152.791	1.08465	352.589	620.831	0.819473	10479.5	0	0.203295	0.201221	-1.02009	114.366	124.919	148.565	270.77	658.62	0.645648	13653	0	0.264858	0.26169	-1.19615	114.366	137.4	118.747	183.44	553.953	0.463121
Chenzhou City	Hunan	20134.3	0	0.2768	0.274113	-0.970737	78.4729	126.033	2.41673	198.614	405.536	0.41776	13967	0	0.192013	0.190076	-1.00868	78.4729	103.042	331.021	152.525	665.061	0.659339	20134.3	0	0.2768	0.273279	-1.27197	78.4729	113.337	264.583	103.332	559.725	0.440041
Changsha City	Hunan	66855.8	0	0.523652	0.493733	-5.7136	231.421	608.047	6.53659	1670.67	2516.67	0.440469	54089.7	0	0.42366	0.398349	-5.97436	231.421	497.128	895.32	1282.98	2906.85	0.486555	66855.8	0	0.523652	0.486599	-7.07598	231.421	546.797	715.623	869.19	2363.03	0.333951
Jilin City	Jilin	1442.7	0	0.0678646	0.0668115	-1.55177	167.572	368.242	6.70005	364.724	907.239	0.584664	1188.7	0	0.0559161	0.0486222	-13.0444	167.572	301.658	61.4129	275.564	806.207	0.0618048	1442.7	0	0.0678646	0.0581956	-14.2475	167.572	332.801	49.6041	248.069	798.046	0.0560133
Siping City	Jilin	726.795	0	0.149859	0.145748	-2.74318	72.3406	166.631	4.50613	73.3873	316.865	0.115509	516.181	0	0.106432	0.0833792	-21.6596	72.3406	136.502	41.3033	55.4471	305.593	0.0141089	726.795	0	0.149859	0.118959	-20.6194	72.3406	150.594	33.3613	49.9147	306.211	0.0148506
Yanbian Korean A.P	Jilin	6059.86	0				117.475	251.215	4.79336	95.6455	469.13		4914.07	0				117.475	205.792	43.9361	72.264	439.467		6059.86	0				117.475	227.037	35.4878	65.0537	445.054
Songyuan City	Jilin	8464.25		0.0774969	0.0717701	-7.38971	91.4448	128.223	7.03041	61.3776	288.076	0.0389832	6238.2		0.0571156	0.0451429	-20.9622	91.4448	105.039	64.4411	46.3732	307.298	0.0146596	8464.25		0.0774969	0.0606033	-21.7991	91.4448	115.883	52.05	41.7463	301.124	0.0138136
Baicheng City	Jilin	1241.58	0	0.0191407	0.0187323	-2.13367	49.2937	65.2767	4.25008	27.5867	146.407	0.0686173	822.576	0	0.0126812	0.0100266	-20.9334	49.2937	53.4737	38.9564	20.8429	162.567	0.0077658	1241.58	0	0.0191407	0.0155939	-18.5301	49.2937	58.9943	31.4656	18.7632	158.517	0.0085546
Baishan City	Jilin	4776.91	0	0.0191095	0.018738	-1.94406	57.8943	86.9613	6.34877	41.6983	192.903	0.0992229	3367.97	0	0.0134732	0.0117175	-13.0311	57.8943	71.2374	58.1931	31.5048	218.829	0.0167932	4776.91	0	0.0191095	0.0167336	-12.4331	57.8943	78.5919	47.0034	28.3613	211.851	0.0170397
Liaoyuan City	Jilin	4932.56	15.8904	0.115553	0.102401	-11.3819	49.8609	97.6769	7.15157	61.8737	216.563	0.0190271	3983.58	12.8332	0.0933215	0.0666151	-28.6176	49.8609	80.0154	65.5516	46.7481	242.176	0.0084625	4932.56	15.8904	0.115553	0.0793596	-31.3219	49.8609	88.2761	52.9469	42.0837	233.168	0.0074442
Tonghua City	Jilin	8343.6	0	0.0386131	0.0373137	-3.36518	102.72	135.806	5.3971	79.033	322.956	0.095968	5929.49	0	0.0274409	0.0232825	-15.154	102.72	111.25	49.4701	59.7126	323.153	0.0213246	8343.6	0	0.0386131	0.0328618	-14.8947	102.72	122.735	39.9577	53.7547	319.168	0.0214284
Changchun City	Jilin	10709	2244.12	0.203989	0.193114	-5.33131	301.476	471.273	8.76087	373.55	1155.06	0.216656	8014.34	1679.44	0.15266	0.128535	-15.8029	301.476	386.06	80.3024	282.232	1050.07	0.0664477	10709	2244.12	0.203989	0.170178	-16.575	301.476	425.916	64.8614	254.072	1046.33	0.0631267
Nanjing City	Jiangsu	49396.6	11809.6	0.461411	0.410704	-10.9894	434.305	413.165	12.4838	213.506	1073.46	0.0976815	38056.8	9098.5	0.355486	0.320974	-9.70816	434.305	355.474	16.4781	176.036	982.294	0.101182	49396.6	11809.6	0.461411	0.407886	-11.6002	434.305	384.434	12.3503	150.172	981.262	0.0845902
Nantong City	Jiangsu	39362	1256.86	0.0513052	0.0431499	-15.8957	396.887	453.798	8.89884	285.743	1145.33	0.0720524	33011.4	1054.08	0.0430278	0.0347207	-19.3064	396.887	390.434	11.7461	235.595	1034.66	0.053592	39362	1256.86	0.0513052	0.0407885	-20.4983	396.887	422.242	8.80371	200.98	1028.91	0.0501949
Suqian City	Jiangsu	23085.4	779.396	0.0645791	0.0538724	-16.5792	150.814	156.21	4.63271	63.1721	374.828	0.0226084	17170.5	579.7	0.0480327	0.0388811	-19.0529	150.814	134.398	6.11499	52.0854	343.412	0.0180242	23085.4	779.396	0.0645791	0.0516935	-19.9532	150.814	145.347	4.58319	44.4326	345.177	0.0172994
Changzhou City	Jiangsu	13145.5	2474.07	0.11837	0.109083	-7.84542	271.047	248.863	11.8552	241.566	773.331	0.0985715	10307.5	1939.95	0.0928153	0.0841195	-9.36893	271.047	214.114	15.6484	199.171	699.981	0.0747135	13145.5	2474.07	0.11837	0.106744	-9.82143	271.047	231.557	11.7285	169.907	684.24	0.0696684
Xuzhou City	Jiangsu	31250.5	3125.53	0.111251	0.0945035	-15.054	264.263	362.993	6.49813	147.987	781.741	0.0519292	25926.8	2593.08	0.0922993	0.0768491	-16.7392	264.263	312.308	8.57727	122.015	707.164	0.042246	31250.5	3125.53	0.111251	0.091102	-18.1115	264.263	337.752	6.42867	104.088	712.531	0.0393413
Yangzhou City	Jiangsu	24720.5	1905.91	0.0697246	0.0602772	-13.5496	204.212	271.441	9.47047	114.204	599.328	0.0442318	20481.4	1579.08	0.057768	0.0486051	-15.8615	204.212	233.54	12.5006	94.1615	544.414	0.0343226	24720.5	1905.91	0.0697246	0.0579142	-16.9386	204.212	252.566	9.36923	80.3265	546.474	0.032262
Wuxi City	Jiangsu	85826.4	6432.98	0.132913	0.0996437	-25.0307	652.718	717.919	13.8325	504.851	1889.32	0.0754804	73231.7	5488.97	0.113408	0.0834943	-26.3772	652.718	617.676	18.2584	416.25	1704.9	0.0646356	85826.4	6432.98	0.132913	0.0947026	-28.7482	652.718	667.997	13.6847	355.091	1689.49	0.0587686
Taizhou City	Jiangsu	14411.6	354.043	0.046518	0.0421801	-9.32521	207.918	132.964	8.3963	22.2016	371.48	0.0398363	10787.4	265.009	0.0348197	0.0307142	-11.7907	207.918	114.398	11.0828	18.3052	351.704	0.029829	14411.6	354.043	0.046518	0.0409829	-11.8988	207.918	123.718	8.30655	15.6157	355.558	0.0298818
Huai'an City	Jiangsu	17793.1	27.1346	0.0421923	0.0384228	-8.93409	161.559	184.399	5.96453	79.352	431.275	0.0482724	14729.4	22.4626	0.0349276	0.0310901	-10.987	161.559	158.651	7.87294	65.4257	393.509	0.0358155	17793.1	27.1346	0.0421923	0.0372958	-11.6052	161.559	171.576	5.90078	55.8129	394.849	0.0340237
Yancheng City	Jiangsu	16491.7	36.4999	0.0145567	0.0126334	-13.2125	244.169	199.156	6.15881	65.2999	514.784	0.038962	12935.1	28.6284	0.0114175	0.0092751	-18.7642	244.169	171.348	8.12938	53.8398	477.486	0.0254475	16491.7	36.4999	0.0145567	0.0118713	-18.4479	244.169	185.307	6.09297	45.9292	481.499	0.0260999
Suzhou City	Jiangsu	134450	6237.35	0.155587	0.118142	-24.0674	1200	1137.66	14.4414	719.604	3039.89	0.126307	113671	5273.41	0.131542	0.0987324	-24.9425	1200	978.807	19.0621	593.314	2759.37	0.110629	134450	6237.35	0.155587	0.113115	-27.2983	1200	1058.55	14.2871	506.14	2747.16	0.100635
Lianyungang City	Jiangsu	15777.7	26.5646	0.112094	0.0990845	-11.6062	123.702	135.005	5.11475	35.223	299.045	0.0257659	11393.6	19.1831	0.0809467	0.070772	-12.5696	123.702	116.154	6.75127	29.0414	275.649	0.0219296	15777.7	26.5646	0.112094	0.0968918	-13.5623	123.702	125.617	5.06008	24.7744	279.153	0.020583
Zhenjiang City	Jiangsu	19734.7	817.294	0.0821924	0.0735724	-10.4876	199.092	183.316	11.6577	69.5985	463.663	0.0442108	15735.6	651.676	0.0655368	0.0577687	-11.853	199.092	157.719	15.3877	57.384	429.582	0.0362425	19734.7	817.294	0.0821924	0.071744	-12.7121	199.092	170.568	11.5331	48.9527	430.146	0.0338375
Shangrao City	Jiangxi	17125.8	0	0.0022541	0.002215	-1.73462	128.661	169.902	3.20901	250.226	551.998	0.318253	12669.6	0	0.0016676	0.001507	-9.63061	128.661	137.864	19.2828	188.567	474.375	0.0492777	17125.8	0	0.0022541	0.0020384	-9.56923	128.661	145.607	15.619	121.755	411.641	0.0430151
Jiujiang City	Jiangxi	18129.5	434.299	0.0083024	0.0081575	-1.74528	120.609	203.219	5.14643	259.016	587.991	0.336879	13523.5	323.96	0.0061931	0.0057917	-6.48141	120.609	164.899	30.9246	195.191	511.624	0.0789521	18129.5	434.299	0.0083024	0.0077503	-6.64988	120.609	174.159	25.0489	126.032	445.849	0.0670471
Nanchang City	Jiangxi	25006.3	0	0.076465	0.0742502	-2.89649	154.205	302.943	9.88497	642.022	1109.06	0.382887	19975.3	0	0.0610811	0.0587134	-3.87632	154.205	245.818	59.3983	483.82	943.241	0.243335	25006.3	0	0.076465	0.0730302	-4.49199	154.205	259.623	48.1125	312.395	774.335	0.172378
Jian City	Jiangxi	11036.8		0.0027307	0.0026957	-1.28172	56.2353	111.239	3.53925	153.423	324.436	0.253166	7859.23		0.0019445	0.0018074	-7.05066	56.2353	90.2632	21.2672	115.617	283.383	0.040187	11036.8		0.0027307	0.0025454	-6.78581	56.2353	95.3324	17.2264	74.6522	243.446	0.035876
Yichun City	Jiangxi	10758	0	0.0037747	0.0037068	-1.79882	87.2565	182.322	3.83745	223.093	496.509	0.275706	8086.71	0	0.0028374	0.0025567	-9.89286	87.2565	147.942	23.059	168.12	426.378	0.0430975	10758	0	0.0037747	0.003398	-9.9796	87.2565	156.251	18.6778	108.552	370.738	0.0371504
Fuzhou City	Jiangxi	4978.79	0	0.0037099	0.0036733	-0.986549	84.2012	127.631	3.61312	248.128	463.573	0.470824	3760.11	0	0.0028018	0.0026377	-5.85695	84.2012	103.564	21.711	186.986	396.462	0.0676998	4978.79	0	0.0037099	0.0034905	-5.91391	84.2012	109.38	17.5859	120.734	331.901	0.0561252
Xinyu City	Jiangxi	8561.84	0	0.0235947	0.0228619	-3.10578	32.3053	102.91	10.5982	147.619	293.433	0.0944881	7208.46	0	0.019865	0.0185164	-6.78882	32.3053	83.5044	63.6841	111.244	290.738	0.0428248	8561.84	0	0.0235947	0.0217782	-7.69876	32.3053	88.194	51.5841	71.8284	243.912	0.0316827
Jingdezhen City	Jiangxi	0	531.592	0.0126088	0.0125531	-0.441755	30.9593	73.6274	6.15096	108.608	219.346	0.496602	0	388.485	0.0092144	0.0089132	-3.2688	30.9593	59.7437	36.9608	81.8458	209.51	0.0640967	0	531.592	0.0126088	0.012209	-3.1708	30.9593	63.0989	29.9382	52.8465	176.843	0.0557714
Pingxiang City	Jiangxi	9233.9	73.0937	0.022849	0.0222708	-2.53053	34.735	61.3791	6.27042	65.0009	167.386	0.0661397	6322	50.0437	0.0156436	0.0149326	-4.54499	34.735	49.805	37.6786	48.9839	171.203	0.0376697	9233.9	73.0937	0.022849	0.0217265	-4.91269	34.735	52.6021	30.5196	31.6281	149.485	0.0304267
Ganzhou City	Jiangxi	16356.2	11.3482	0.0061312	0.0060741	-0.931302	109.288	179.269	3.01555	270.664	562.237	0.603459	11825.6	8.20475	0.0044328	0.0042563	-3.98168	109.288	145.465	18.1203	203.969	476.842	0.119742	16356.2	11.3482	0.0061312	0.0058888	-3.95355	109.288	153.634	14.6774	131.7	409.299	0.103548
Yingtan City	Jiangxi	5709.06		0.0057857	0.0056581	-2.20544	28.7633	63.6395	7.239	34.1126	133.754	0.0606736	4749.59		0.0048133	0.0043975	-8.63856	28.7633	51.6392	43.4988	25.7068	149.608	0.0173168	5709.06		0.0057857	0.0052299	-9.60644	28.7633	54.5393	35.234	16.5985	135.135	0.0140669
Dandong City	Liaoning	9045.37	0	0.0259038	0.0233219	-9.96726	59.132	40.606	0.214333	152.516	252.469	0.0253297	6534.68	0	0.0187138	0.0145579	-22.2077	59.132	33.7182	0.447194	123.069	216.367	0.0097429	9045.37	0	0.0259038	0.020596	-20.4904	59.132	38.535	0.338182	81.4186	179.424	0.0087565
Dalian City	Liaoning	3477.67	20441.7	0.549231	0.481781	-12.2808	243.297	268.236	0.580729	902.82	1414.93	0.115215	2775.84	16316.3	0.43839	0.331248	-24.4399	243.297	222.736	1.21166	728.51	1195.75	0.0489264	3477.67	20441.7	0.549231	0.413822	-24.6542	243.297	254.555	0.916295	481.958	980.726	0.0397792
Fushun City	Liaoning	16293.1		0.135066	0.113062	-16.2914	42.3416	107.921	0.307448	373.248	523.818	0.032153	14627.6		0.12126	0.0909262	-25.0153	42.3416	89.6148	0.641475	301.184	433.782	0.0173407	16293.1		0.135066	0.0977598	-27.6207	42.3416	102.417	0.485103	199.253	344.497	0.0124724
Chaoyang City	Liaoning	6590.91	2854.53	0.13588	0.0978099	-28.0174	79.2209	67.2802	0.151381	416.279	562.932	0.0200922	5312.41	2300.81	0.109522	0.054323	-50.3999	79.2209	55.8678	0.315849	335.907	471.312	0.0093514	6590.91	2854.53	0.13588	0.0660933	-51.359	79.2209	63.8487	0.238855	222.225	365.533	0.0071172
Benxi City	Liaoning	12563.3	0	0.169927	0.151763	-10.6893	41.6322	76.258	0.354979	37.6174	155.863	0.0145812	10933	0	0.147875	0.124886	-15.5463	41.6322	63.3227	0.740646	30.3544	136.05	0.0087513	12563.3	0	0.169927	0.141036	-17.0021	41.6322	72.3686	0.560099	20.0815	134.642	0.0079191
Shenyang City	Liaoning	3929.94	2448.53	0.724149	0.682003	-5.8201	264.145	164.691	0.460844	910.524	1339.82	0.230206	2916.69	1817.23	0.537443	0.482269	-10.2661	264.145	136.755	0.961528	734.726	1136.59	0.110712	3929.94	2448.53	0.724149	0.650399	-10.1844	264.145	156.291	0.727137	486.07	907.234	0.0890802
Panjin City	Liaoning	10784		0.665038	0.33778	-49.2089	67.8819	59.3313	0.458315	175.817	303.489	0.0061674	9008.7		0.555556	0.245523	-55.8059	67.8819	49.2672	0.956251	141.872	259.977	0.0046586	10784		0.665038	0.269761	-59.4367	67.8819	56.3052	0.723147	93.8576	218.768	0.0036807
Yingkou City	Liaoning	6071.72	653.926	0.168304	0.138496	-17.7107	139.658	52.7088	0.32491	182.372	375.064	0.0211772	4849.18	522.257	0.134416	0.0949194	-29.3839	139.658	43.768	0.677907	147.161	331.265	0.0112737	6071.72	653.926	0.168304	0.11727	-30.3225	139.658	50.0205	0.512654	97.3568	287.548	0.009483
Huludao City	Liaoning	10860.8	1165.98	0.121686	0.0923738	-24.0886	66.8294	49.8543	0.147835	72.1381	188.97	0.0078448	8578.07	920.914	0.0961104	0.0599813	-37.5912	66.8294	41.3977	0.308449	58.2102	166.746	0.0044358	10860.8	1165.98	0.121686	0.074537	-38.7466	66.8294	47.3116	0.233259	38.5099	152.884	0.0039457
Liaoyang City	Liaoning	2231.09	198.01	0.176502	0.154548	-12.4381	53.9148	66.6998	0.292112	310.149	431.056	0.0346562	1939.43	172.125	0.153429	0.117213	-23.6046	53.9148	55.3858	0.609476	250.268	360.178	0.0152588	2231.09	198.01	0.176502	0.13148	-25.5079	53.9148	63.298	0.460904	165.569	283.243	0.0111041
Tieling City	Liaoning	11769.9	1298.01	0.0432668	0.0283418	-34.4953	53.3324	71.3166	0.146308	245.083	369.879	0.0107226	9771.43	1077.62	0.0359204	0.0118352	-67.0516	53.3324	59.2195	0.305263	197.764	310.622	0.0046326	11769.9	1298.01	0.0432668	0.0133143	-69.2274	53.3324	67.6792	0.23085	130.834	252.077	0.0036413
Jinzhou City	Liaoning	21334.5	631.365	0.424722	0.272615	-35.8133	87.7501	104.113	0.226699	300.966	493.056	0.0137674	17204.1	509.13	0.342494	0.197299	-42.3934	87.7501	86.453	0.472997	242.858	417.534	0.009849	21334.5	631.365	0.424722	0.231226	-45.5581	87.7501	98.8032	0.357695	160.667	347.577	0.0076293
Fuxin City	Liaoning	11163.8	0	0.239676	0.166134	-30.684	79.138	59.898	0.154734	308.381	447.572	0.0145865	9480.39	0	0.203535	0.119464	-41.3055	79.138	49.7378	0.322845	248.841	378.04	0.0091523	11163.8	0	0.239676	0.133493	-44.3029	79.138	56.843	0.244145	164.625	300.85	0.0067908
Anshan City	Liaoning	14570.5	0	0.265955	0.234268	-11.9141	137.706	93.2799	0.339522	422.985	654.31	0.0549187	11883.1	0	0.216901	0.181847	-16.1613	137.706	77.4573	0.708395	341.318	557.189	0.0344767	14570.5	0	0.265955	0.219517	-17.4607	137.706	88.5224	0.53571	225.804	452.568	0.0259193
Ulanqab City	Inner Mongolia	0	1211.95	1.87445	1.85579	-0.995543	107.703	156.8	18.3746	94.8402	377.718	0.379399	0	823.985	1.27441	1.255	-1.52321	107.703	126.145	21.2372	71.0756	326.161	0.214128	0	1211.95	1.87445	1.84837	-1.3915	107.703	148.729	17.4123	58.5178	332.362	0.238854
Wuhai City	Inner Mongolia	690.471	915.461	14.3975	11.3434	-21.2126	28.9172	114.937	42.8835	87.9782	274.716	0.0129506	553.586	733.972	11.5432	9.38432	-18.7027	28.9172	92.4668	49.5643	65.9331	236.881	0.0126656	690.471	915.461	14.3975	11.2299	-22.0008	28.9172	109.021	40.6376	54.2838	232.859	0.0105841
Xingan League	Inner Mongolia	5365.33	1187.39	0.509939	0.502919	-1.37665	73.6789	117.6	13.3453	26.4491	231.073	0.167851	3867.26	855.857	0.367558	0.362885	-1.27131	73.6789	94.6091	15.4244	19.8216	203.534	0.1601	5365.33	1187.39	0.509939	0.502146	-1.52832	73.6789	111.546	12.6464	16.3195	214.191	0.140148
Baotou City	Inner Mongolia	22789.5	9253.17	3.20064	2.20509	-31.1047	259.263	639.081	56.225	524.91	1479.48	0.0475645	17750.1	7207.01	2.49288	1.81438	-27.2173	259.263	514.139	64.9843	393.381	1231.77	0.0452567	22789.5	9253.17	3.20064	2.17641	-32.0008	259.263	606.183	53.2804	323.877	1242.6	0.0388303
Hulunbuir City	Inner Mongolia	3386.16	1792.5	0.072477	0.0715609	-1.26399	234.194	333.539	26.839	159.785	754.357	0.596836	2721.59	1440.7	0.0582527	0.0573272	-1.58877	234.194	268.332	31.0203	119.747	653.293	0.41118	3386.16	1792.5	0.072477	0.0712244	-1.72827	234.194	316.37	25.4334	98.5897	674.586	0.390331
Hohhot City	Inner Mongolia	1971.09	1067.97	2.22954	2.13538	-4.22312	202.285	434.087	43.1475	147.778	827.297	0.195898	1482.81	803.411	1.67723	1.60262	-4.44841	202.285	349.222	49.8695	110.749	712.124	0.160086	1971.09	1067.97	2.22954	2.11785	-5.00947	202.285	411.741	40.8878	91.1813	746.094	0.148937
Bayannur City	Inner Mongolia	502.68	1216.78	23.0257	22.7354	-1.26102	119.823	209.742	22.5265	170.866	522.958	0.414715	362.892	878.41	16.6226	16.4498	-1.03955	119.823	168.737	26.0359	128.051	442.647	0.425802	502.68	1216.78	23.0257	22.7193	-1.33073	119.823	198.945	21.3467	105.427	445.542	0.334806
Chifeng City	Inner Mongolia	7290.64	1551.85	1.5594	1.49023	-4.43556	201.064	546.424	18.395	345.952	1111.83	0.250665	5474.49	1165.28	1.17094	1.12168	-4.20713	201.064	439.596	21.2608	259.265	921.186	0.218957	7290.64	1551.85	1.5594	1.48198	-4.96461	201.064	518.295	17.4317	213.458	950.247	0.191405
Tongliao City	Inner Mongolia	10094.5	234.122	1.28796	1.24071	-3.6686	116.29	382.362	25.5666	263.749	787.967	0.214786	8083.21	187.474	1.03133	0.996922	-3.33664	116.29	307.609	29.5496	197.66	651.109	0.195137	10094.5	234.122	1.28796	1.2368	-3.97164	116.29	362.678	24.2276	162.737	665.933	0.167671
Erdos City	Inner Mongolia	2488.62	13329.8	2.57199	2.5248	-1.83473	332.896	255.418	88.0716	293.992	970.377	0.528894	1597.81	8558.37	1.65133	1.62397	-1.6569	332.896	205.483	101.792	220.325	860.496	0.519351	2488.62	13329.8	2.57199	2.51987	-2.02618	332.896	242.27	83.4591	181.397	840.022	0.414584
Xilingol League	Inner Mongolia	316.616	593.098	0.368815	0.365295	-0.954624	115.152	97.103	40.8233	49.3573	302.435	0.316812	222.472	416.743	0.25915	0.255715	-1.32541	115.152	78.1191	47.1832	36.9896	277.443	0.209324	316.616	593.098	0.368815	0.364061	-1.28913	115.152	92.1043	38.6853	30.4542	276.395	0.214404
Alxa League	Inner Mongolia	0	847.843	5.31568	5.30424	-0.215118	80.377	45.283	56.622	12.1379	194.42	0.903779	0	637.747	3.99845	3.98656	-0.29749	80.377	36.43	65.4432	9.09647	191.347	0.643207	0	847.843	5.31568	5.2997	-0.300676	80.377	42.9519	53.6566	7.48928	184.475	0.613547
Wuzhong City	Ningxia	1644.66	646.808	25.196	21.9552	-12.8623	67.1118	23.9406	0.0219055	82.9464	174.021	0.0135296	1292.15	508.176	19.7956	17.6594	-10.7911	67.1118	20.3396	0.0844034	70.2046	157.74	0.0146176	1644.66	646.808	25.196	21.8705	-13.1986	67.1118	22.4197	0.0612383	57.575	147.168	0.0111503
Guyuan City	Ningxia	182.198	87.3226	0.958724	0.95268	-0.630504	26.7369	5.37519	0.0131265	22.0533	54.1786	0.0859297	122.18	58.5577	0.642911	0.634521	-1.30492	26.7369	4.56668	0.0505773	18.6656	50.0198	0.0383317	182.198	87.3226	0.958724	0.946823	-1.24136	26.7369	5.0337	0.036696	15.3077	47.115	0.0379546
Shizuishan City	Ningxia	1474.89	815.33	14.2175	12.5472	-11.7479	72.1558	19.4738	0.0456174	25.1115	116.787	0.0099411	1226.72	678.143	11.8253	10.5835	-10.501	72.1558	16.5447	0.175767	21.254	110.13	0.0104876	1474.89	815.33	14.2175	12.4774	-12.2392	72.1558	18.2366	0.127527	17.4305	107.95	0.0088201
Yinchuan City	Ningxia	9192.63	650.425	17.7764	10.3998	-41.4966	125.147	95.846	0.0513331	227.18	448.225	0.0108015	8092.04	572.553	15.6481	9.45837	-39.5557	125.147	81.4293	0.19779	192.282	399.056	0.0100885	9192.63	650.425	17.7764	10.204	-42.598	125.147	89.7568	0.143505	157.691	372.739	0.0087501
Haidong City	Qinghai	1992.07		1.36824	1.34413	-1.76183	106.628	8.7571	0.310604	28.8191	144.515	0.0820272	1257.74		0.863874	0.850588	-1.53798	106.628	6.47086	0.807147	20.6829	134.589	0.0875105	1992.07		1.36824	1.33994	-2.06813	106.628	7.08107	0.686599	28.8191	143.215	0.0692497
Haibei Zang A.P	Qinghai	0					58.7081	0	0.374162	6.78989	65.8722		0					58.7081	0	0.972313	4.87298	64.5534		0					58.7081	0	0.827096	6.78989	66.3251
Hainan Zang A.P	Qinghai	1233.88	0	0.236543	0.235216	-0.561165	29.4148	4.48643	0.352972	17.6339	51.8881	0.0924652	830.264	0	0.159167	0.157851	-0.826993	29.4148	3.31515	0.917247	12.6555	46.3027	0.0559895	1233.88	0	0.236543	0.234361	-0.922706	29.4148	3.62777	0.780255	17.6339	51.4567	0.0557675
Haixi Mongolian & Zang A.P	Qinghai	0	1156.14	0.134713	0.134406	-0.227225	49.9949	15.0966	1.01517	33.2775	99.3841	0.437362	0	904.625	0.105406	0.10469	-0.679183	49.9949	11.1553	2.63805	23.8826	87.6709	0.129077	0	1156.14	0.134713	0.133714	-0.740837	49.9949	12.2072	2.24405	33.2775	97.7237	0.131903
Xining City	Qinghai	1786.77	802.851	0.894646	0.868581	-2.91348	224.447	61.8691	0.575737	422.526	709.419	0.243496	1331.37	598.227	0.666626	0.628726	-5.68541	224.447	45.7168	1.49613	303.239	574.9	0.101119	1786.77	802.851	0.894646	0.839067	-6.21242	224.447	50.0279	1.27268	422.526	698.274	0.1124
Huangnan Zang AP	Qinghai	470.477		0.374103	0.37314	-0.257149	16.2662	0.308664	0.318167	3.37256	20.2656	0.0788048	237.386		0.188759	0.188426	-0.176204	16.2662	0.22808	0.8268	2.42042	19.7415	0.112055	470.477		0.374103	0.373046	-0.282436	16.2662	0.249588	0.703317	3.37256	20.5917	0.0729045
Dongying City	Shandong	16208.5		3.4552	2.59903	-24.7792	140.72	139.565	4.24727	66.4819	351.015	0.0141657	12523		2.66956	2.11704	-20.6971	140.72	116.859	6.14999	53.9423	317.672	0.0153486	16208.5		3.4552	2.58963	-25.0513	140.72	134.851	4.63991	46.3828	326.594	0.013037
Linyi City	Shandong	57688.7	671.798	1.30869	1.02254	-21.8652	257.547	372.245	0.949676	49.3908	680.133	0.0311058	45652.4	531.633	1.03564	0.841108	-18.7836	257.547	311.684	1.37512	40.0749	610.681	0.0325115	57688.7	671.798	1.30869	1.01643	-22.332	257.547	359.671	1.03747	34.4588	652.715	0.0292277
Weihai City	Shandong	2845.48	834.927	1.0609	0.998509	-5.881	146.843	141.592	2.77011	107.774	398.978	0.0678424	2255.24	661.738	0.840837	0.7904	-5.99844	146.843	118.556	4.01108	87.4458	356.856	0.0594914	2845.48	834.927	1.0609	0.988741	-6.8018	146.843	136.809	3.0262	75.1912	361.869	0.0532023
Dezhou City	Shandong	29762.9	26.562	2.74567	2.20501	-19.6916	183.338	222.226	1.24518	108.994	515.803	0.0261941	22773.6	20.3243	2.10089	1.76136	-16.1616	183.338	186.072	1.803	88.4358	459.648	0.0284408	29762.9	26.562	2.74567	2.19854	-19.9272	183.338	214.72	1.36029	76.0424	475.46	0.0238599
Rizhao City	Shandong	12549.3	2432.16	1.05768	0.880483	-16.7531	132.527	124.105	1.5055	72.1213	330.258	0.0197133	10626.1	2059.43	0.895587	0.758578	-15.2982	132.527	103.914	2.17995	58.518	297.139	0.0194231	12549.3	2432.16	1.05768	0.873526	-17.4109	132.527	119.912	1.64468	50.3173	304.401	0.0174834
Zaozhuang City	Shandong	17562.3	472.355	2.34672	1.67793	-28.4992	138.865	167.471	1.36513	100.41	408.111	0.0143201	13485.7	362.71	1.80199	1.3658	-24.2059	138.865	140.225	1.97669	81.471	362.537	0.0149772	17562.3	472.355	2.34672	1.66608	-29.0038	138.865	161.814	1.49133	70.0536	372.224	0.0128336
Taian City	Shandong	19145.3	1828.99	2.18895	1.74908	-20.0951	112.229	184.046	1.46353	97.1543	394.893	0.0196512	15676.2	1497.58	1.79232	1.47762	-17.5583	112.229	154.103	2.11917	78.8294	347.281	0.0197787	19145.3	1828.99	2.18895	1.74068	-20.4788	112.229	177.829	1.59883	67.7822	359.44	0.0175518
Jinan City	Shandong	43785	3661.12	2.06228	1.48951	-27.7735	282.984	346.013	2.22597	206.319	837.542	0.0301561	35708.5	2985.8	1.68188	1.27042	-24.4641	282.984	289.72	3.22318	167.403	743.33	0.0303845	43785	3661.12	2.06228	1.47994	-28.2381	282.984	334.325	2.43175	143.943	763.685	0.0270445
Jining City	Shandong	48738.8	5817.62	2.90104	2.13606	-26.3691	278.078	354.92	1.25728	152.152	786.407	0.029823	37871.2	4520.43	2.25418	1.75374	-22.2007	278.078	297.177	1.82052	123.454	700.529	0.0315544	48738.8	5817.62	2.90104	2.1276	-26.6608	278.078	342.931	1.37351	106.153	728.535	0.0273261
Zibo City	Shandong	23512	3842.74	2.13747	1.57896	-26.1293	184.645	298.871	2.31188	262.928	748.756	0.0286558	19841	3242.76	1.80373	1.37547	-23.7433	184.645	250.247	3.34757	213.336	651.575	0.0274424	23512	3842.74	2.13747	1.56468	-26.7974	184.645	288.775	2.5256	183.439	659.384	0.0246063
Binzhou City	Shandong	19863.1	158	1.99173	1.66734	-16.2869	159.229	185.811	1.58527	194.449	541.074	0.0332215	16948.6	134.817	1.69948	1.45135	-14.6003	159.229	155.581	2.29545	157.773	474.878	0.0325253	19863.1	158	1.99173	1.66073	-16.6187	159.229	179.534	1.73182	135.662	476.157	0.0286519
Weifang City	Shandong	47159	2041.98	1.56003	1.06577	-31.683	451.683	546.172	1.44628	423.408	1422.71	0.0449046	41608.7	1801.65	1.37643	0.963661	-29.9884	451.683	457.314	2.09419	343.546	1254.64	0.0418374	47159	2041.98	1.56003	1.05015	-32.6839	451.683	527.724	1.57998	295.401	1276.39	0.0390524
Yantai City	Shandong	4885.01	341.218	0.792774	0.758621	-4.308	205.858	313.971	2.38297	217.201	739.413	0.171637	3891.6	271.828	0.631555	0.601195	-4.80726	205.858	262.89	3.45051	176.233	648.432	0.134886	4885.01	341.218	0.792774	0.750832	-5.29055	205.858	303.366	2.60327	151.536	663.363	0.125387
Liaocheng City	Shandong	23674.2	5982.94	4.29868	3.14373	-26.8675	199.559	292.527	1.15919	137.127	630.372	0.0234622	19047.2	4813.59	3.45852	2.65388	-23.2655	199.559	244.935	1.67849	111.263	557.435	0.0239598	23674.2	5982.94	4.29868	3.12914	-27.2069	199.559	282.646	1.26635	95.6702	579.141	0.0212865
Laiwu City	Shandong	6948.21	3435.88	2.89212	2.076	-28.2186	23.812	47.2928	1.27925	38.7389	111.123	0.0039379	5197.99	2570.39	2.16361	1.66147	-23.2085	23.812	39.5986	1.85234	31.4321	96.6951	0.0041664	6948.21	3435.88	2.89212	2.06753	-28.5116	23.812	45.6953	1.39751	27.0272	97.9321	0.0034348
Heze City	Shandong	30905	1369.17	1.84993	1.60188	-13.4086	210.721	210.142	0.734486	115.671	537.268	0.0400688	23941	1060.65	1.43308	1.27499	-11.0316	210.721	175.953	1.06353	93.8534	481.592	0.043656	30905	1369.17	1.84993	1.5979	-13.624	210.721	203.044	0.802386	80.7007	495.268	0.0363526
Qingdao City	Shandong	24453.6	271.58	4.61036	2.41512	-47.6155	499.485	537.41	2.65604	528.183	1567.73	0.0329249	19997.9	222.096	3.77032	2.11645	-43.8656	499.485	449.978	3.84591	428.559	1381.87	0.0315023	24453.6	271.58	4.61036	2.36974	-48.5996	499.485	519.257	2.90158	368.501	1390.14	0.028604
Linfen City	Shanxi	6250.14	1176.6	1.89663	1.74726	-7.87524	171.756	422.894	0.709731	94.3114	689.671	0.0875746	4523.41	851.538	1.37264	1.27753	-6.92925	171.756	359.799	1.22104	73.9358	606.712	0.087558	6250.14	1176.6	1.89663	1.73272	-8.64192	171.756	382.848	0.958733	60.1135	615.676	0.0712429
Luliang City	Shanxi	2938.32	920.942	1.1662	1.13013	-3.09305	162.883	272.777	0.676299	68.1415	504.478	0.163101	2031.11	636.601	0.806133	0.781163	-3.09745	162.883	232.08	1.16352	53.4198	449.546	0.145134	2938.32	920.942	1.1662	1.12313	-3.69252	162.883	246.947	0.913571	43.433	454.176	0.122998
Datong City	Shanxi	9264.73	2326.32	1.44443	1.26045	-12.7374	165.234	578.414	0.838213	199.019	943.506	0.0740742	7211.93	1810.87	1.12438	0.989342	-12.0102	165.234	492.116	1.44208	156.022	814.815	0.0678436	9264.73	2326.32	1.44443	1.23919	-14.2092	165.234	523.641	1.13229	126.854	816.862	0.0574884
Taiyuan City	Shanxi	27694.9	3924.06	2.28852	1.31829	-42.3956	326.858	1599.34	1.71713	606.027	2533.95	0.0597691	24182.9	3426.45	1.99832	1.16234	-41.834	326.858	1360.73	2.9542	475.098	2165.64	0.0517674	27694.9	3924.06	2.28852	1.2495	-45.4014	326.858	1447.89	2.31957	386.278	2163.35	0.0476494
Xinzhou City	Shanxi	5881.59	388.045	0.748	0.709843	-5.10118	112.749	407.759	0.587796	63.6375	584.733	0.114627	4643.78	306.379	0.590579	0.55875	-5.3895	112.749	346.923	1.01126	49.8889	510.572	0.0947343	5881.59	388.045	0.748	0.7015	-6.21658	112.749	369.146	0.794018	40.5622	523.252	0.0841704
Jinzhong City	Shanxi	2938.56	550.214	1.44232	1.3846	-4.00203	163.483	469.06	0.850249	134.716	768.109	0.191928	2212	414.173	1.0857	1.03835	-4.36178	163.483	399.078	1.46279	105.611	669.635	0.153524	2938.56	550.214	1.44232	1.37014	-5.0041	163.483	424.643	1.14855	85.867	675.141	0.134917
Jincheng City	Shanxi	1319.89	66.7764	0.802194	0.777704	-3.05291	147.657	466.051	1.21703	80.419	695.344	0.227764	993.421	50.2593	0.603773	0.57603	-4.59484	147.657	396.518	2.09381	63.0448	609.313	0.132608	1319.89	66.7764	0.802194	0.763777	-4.789	147.657	421.918	1.64401	51.2586	622.478	0.129981
Shuozhou City	Shanxi	4147.5	1584.86	2.66275	2.44865	-8.04046	64.1314	198.423	1.38641	53.4272	317.368	0.0394713	2735.47	1045.29	1.75621	1.64788	-6.16807	64.1314	168.819	2.38522	41.8845	277.22	0.0449441	4147.5	1584.86	2.66275	2.43761	-8.45488	64.1314	179.633	1.87282	34.0542	279.692	0.0330804
Yuncheng City	Shanxi	6538.4	1450.75	2.47662	2.33138	-5.8644	172.815	573.553	0.603295	106.333	853.304	0.145505	4989.12	1106.99	1.88978	1.79029	-5.26457	172.815	487.98	1.03792	83.3605	745.193	0.141548	6538.4	1450.75	2.47662	2.31733	-6.43167	172.815	519.24	0.814954	67.7763	760.646	0.118266
Changzhi City	Shanxi	16087.3	4415.3	0.958291	0.798117	-16.7146	294.712	687.088	0.94749	168.352	1151.1	0.068868	12632.3	3467.04	0.752482	0.632059	-16.0035	294.712	584.577	1.63009	131.98	1012.9	0.0632925	16087.3	4415.3	0.958291	0.7791	-18.699	294.712	622.024	1.27991	107.307	1025.32	0.054833
Yangquan City	Shanxi	8062.8	1322.92	1.1187	0.849847	-24.0328	33.4401	335.046	1.15466	78.3576	447.998	0.0186411	6309.03	1035.17	0.87537	0.675777	-22.801	33.4401	285.058	1.9865	61.4288	381.914	0.0167499	8062.8	1322.92	1.1187	0.822703	-26.4592	33.4401	303.319	1.55975	49.9447	388.263	0.0146741
Xianyang City	Shaanxi	17372.7	1466.79	3.8629	2.91299	-24.5905	151.803	327.111	17.2278	663.503	1159.64	0.0471583	13069.7	1103.49	2.90612	2.27547	-21.7008	151.803	273.942	195.799	523.432	1144.98	0.0527619	17372.7	1466.79	3.8629	2.84483	-26.3549	151.803	297.888	151.95	305.099	906.74	0.0344049
Shangluo City	Shaanxi	5093.25	6.91981	0.239953	0.235865	-1.70383	37.1317	56.2259	10.4793	121.935	225.772	0.132511	3474.6	4.72068	0.163696	0.159629	-2.48425	37.1317	47.0869	119.1	96.1937	299.512	0.120566	5093.25	6.91981	0.239953	0.233229	-2.80234	37.1317	51.2029	92.4276	56.0695	236.832	0.0845129
Ankang City	Shaanxi	4976.1	0	0.187607	0.186595	-0.539159	62.9976	63.8398	11.5813	106.01	244.429	0.453355	3336.93	0	0.125807	0.124581	-0.974584	62.9976	53.4633	131.625	83.6301	331.716	0.340353	4976.1	0	0.187607	0.185651	-1.04271	62.9976	58.1365	102.148	48.7464	272.029	0.260888
Baoji City	Shaanxi	19056	152.554	0.648413	0.603016	-7.00135	60.3822	209.106	18.8698	264.98	553.338	0.079033	13674.3	109.471	0.465293	0.432262	-7.09906	60.3822	175.118	214.46	209.041	659.001	0.0928294	19056	152.554	0.648413	0.591871	-8.72015	60.3822	190.425	166.433	121.846	539.086	0.0618207
Yan'an City	Shaanxi	646.254	42.4525	0.674604	0.667968	-0.983688	47.8231	71.8351	21.3925	66.7012	207.752	0.211196	470.43	30.9026	0.491067	0.476649	-2.93602	47.8231	60.1591	243.132	52.62	403.734	0.137511	646.254	42.4525	0.674604	0.654509	-2.97868	47.8231	65.4176	188.683	30.6712	332.595	0.111659
Yulin City	Shaanxi	9417.03	168.759	0.826084	0.786614	-4.77793	105.301	151.143	30.6531	242.319	529.416	0.110805	6805.95	121.967	0.597033	0.567065	-5.01955	105.301	126.576	348.381	191.163	771.421	0.153683	9417.03	168.759	0.826084	0.775523	-6.1205	105.301	137.64	270.362	111.426	624.728	0.102071
Hanzhong City	Shaanxi	5737.75	0	0.275134	0.273516	-0.587969	71.9898	164.775	12.2986	199.914	448.978	0.763595	4325.24	0	0.207402	0.204697	-1.30423	71.9898	137.993	139.777	157.711	507.47	0.3891	5737.75	0	0.275134	0.2713	-1.39321	71.9898	150.055	108.474	91.9265	422.446	0.303216
Weinan City	Shaanxi	14338.6	0	3.14572	2.7276	-13.2916	92.019	190.365	10.8907	268.921	562.196	0.042297	10467.4	0	2.29643	2.04359	-11.0102	92.019	159.423	123.775	212.149	587.367	0.0533475	14338.6	0	3.14572	2.70161	-14.1181	92.019	173.359	96.0561	123.658	485.092	0.0343596
Xi'an City	Shaanxi	29164.5	1042.66	1.03952	0.91409	-12.0662	419.779	1247.13	26.5554	2017	3710.46	0.307508	25686.8	918.333	0.915564	0.758872	-17.1142	419.779	1044.42	301.809	1591.19	3357.2	0.196165	29164.5	1042.66	1.03952	0.841367	-19.062	419.779	1135.71	234.22	927.476	2717.19	0.142544
Tongchuan City	Shaanxi	2816.11	212.307	1.02548	0.904177	-11.8291	11.0531	30.4389	15.2252	36.5496	93.2669	0.0078845	1939.1	146.189	0.706119	0.630678	-10.6839	11.0531	25.4914	173.038	28.8337	238.417	0.0223154	2816.11	212.307	1.02548	0.885486	-13.6519	11.0531	27.7196	134.287	16.8066	189.866	0.0139078
Shanghai	Shanghai	68698.1	371.956	4.63154	4.04131	-12.7439	808.808	1142.36	60.7089	2540.85	4552.72	0.357248	49640.1	268.769	3.34668	3.0271	-9.549	808.808	866.012	45.9847	1859.44	3580.24	0.374934	68698.1	371.956	4.63154	4.04134	-12.743	808.808	1104.6	38.8326	1428.99	3381.24	0.26534
Leshan City	Sichuan	14953.5	0	0.281935	0.277712	-1.49786	64.4963	173.57	3.29375	39.215	280.575	0.187317	10864.9	0	0.204849	0.202064	-1.35939	64.4963	139.695	56.3488	29.3201	289.86	0.213232	14953.5	0	0.281935	0.276996	-1.75214	64.4963	149.945	45.9969	28.0207	288.459	0.164633
Neijiang City	Sichuan	12249.4	87.9861	1.69603	1.55152	-8.52041	57.4334	125.13	2.64337	36.346	221.552	0.0260025	8504.52	61.0869	1.17752	1.10318	-6.31352	57.4334	100.709	45.2223	27.1751	230.539	0.0365154	12249.4	87.9861	1.69603	1.54791	-8.73362	57.4334	108.098	36.9144	25.9707	228.417	0.0261538
Liangshan Yi A.P	Sichuan	9950.39	0	0.223607	0.222992	-0.274857	32.2326	59.6641	2.32992	4.36652	98.5932	0.358716	5914.03	0	0.132901	0.132631	-0.202933	32.2326	48.0197	39.8599	3.26474	123.377	0.607877	9950.39	0	0.223607	0.222924	-0.305357	32.2326	51.5433	32.5371	3.12005	119.433	0.391151
Nanchong City	Sichuan	17063.4	73.153	0.672757	0.643897	-4.28978	69.0281	230.503	1.96778	89.0711	390.57	0.0910467	12675.7	54.3423	0.499763	0.481822	-3.58992	69.0281	185.517	33.6644	66.5963	354.806	0.0988338	17063.4	73.153	0.672757	0.641497	-4.64655	69.0281	199.13	27.4798	63.6448	359.283	0.0773225
Yibin City	Sichuan	9299.91	0	0.385996	0.381866	-1.07014	45.0643	129.985	2.80652	48.6311	226.487	0.211638	6214.15	0	0.257921	0.255597	-0.900858	45.0643	104.617	48.0134	36.3603	234.054	0.259812	9299.91	0	0.385996	0.381248	-1.23009	45.0643	112.293	39.1928	34.7488	231.299	0.188032
Bazhong City	Sichuan	2079.56	0	0.172221	0.171579	-0.373009	28.0435	78.2492	1.24225	17.8116	125.347	0.336055	1552.16	0	0.128544	0.127763	-0.607651	28.0435	62.9776	21.2522	13.3173	125.591	0.206697	2079.56	0	0.172221	0.171021	-0.696953	28.0435	67.5987	17.3479	12.7271	125.717	0.180383
Guangyuan City	Sichuan	4723.7	0	0.151982	0.150872	-0.730219	67.7961	140.419	1.91685	43.6891	253.821	0.347584	3770.39	0	0.12131	0.119948	-1.12266	67.7961	113.014	32.7932	32.6653	246.268	0.219355	4723.7	0	0.151982	0.150005	-1.30062	67.7961	121.306	26.7687	31.2176	247.089	0.189974
Guangan City	Sichuan	9394.11	25.1485	0.670207	0.646869	-3.48209	40.2868	111.075	2.55817	22.2414	176.161	0.0505906	6576.25	17.605	0.469171	0.456303	-2.74275	40.2868	89.3965	43.7647	16.6294	190.077	0.0693017	9394.11	25.1485	0.670207	0.645163	-3.73665	40.2868	95.9562	35.7246	15.8924	187.86	0.0502749
Deyang City	Sichuan	17172.1	0	1.43205	1.3366	-6.66521	61.6457	240.928	3.76573	61.7591	368.098	0.0552265	12747.4	0	1.06305	1.00655	-5.31545	61.6457	193.907	64.4234	46.1758	366.152	0.0688835	17172.1	0	1.43205	1.33272	-6.93629	61.6457	208.135	52.5881	44.1293	366.498	0.0528378
Chengdu City	Sichuan	79950.1	497.193	1.64996	1.4309	-13.2768	531.775	1520.06	6.12005	539.727	2597.68	0.195655	66317.3	412.413	1.36861	1.20636	-11.855	531.775	1223.4	104.701	403.541	2263.41	0.190924	79950.1	497.193	1.64996	1.42042	-13.9116	531.775	1313.17	85.4658	385.656	2316.07	0.166484
Panzhihua City	Sichuan	4876.44	0	0.317564	0.314097	-1.09194	33.8258	70.1364	6.18638	27.5039	137.653	0.126062	3661.8	0	0.238464	0.236013	-1.02812	33.8258	56.4482	105.835	20.5641	216.673	0.210752	4876.44	0	0.317564	0.31345	-1.29571	33.8258	60.5902	86.3921	19.6527	200.461	0.154713
Luzhou City	Sichuan	12529.9	72.2022	0.422547	0.414455	-1.91494	59.1855	118.546	2.61321	25.4944	205.839	0.107491	8417.2	48.5033	0.283855	0.279605	-1.49728	59.1855	95.4096	44.7063	19.0616	218.363	0.14584	12529.9	72.2022	0.422547	0.413705	-2.09245	59.1855	102.41	36.4932	18.2168	216.306	0.103375
Ganzi Zang A.P	Sichuan	1489.41		0.0301565	0.0301488	-0.0255335	3.17863	5.07899	1.51804	0.514259	10.2899	0.403574	806.137		0.016322	0.0163171	-0.0300208	3.17863	4.08774	25.9704	0.384499	33.6213	1.10302	1489.41		0.0301565	0.0301453	-0.0371396	3.17863	4.38769	21.1993	0.367458	29.1331	0.782984
Meishan City	Sichuan	10404	0	0.764446	0.746611	-2.33311	36.0237	98.7479	2.83281	29.5947	167.199	0.0716636	7108.17	0	0.522279	0.513187	-1.74085	36.0237	79.4757	48.4631	22.1272	186.09	0.106896	10404	0	0.764446	0.745692	-2.45328	36.0237	85.3074	39.5598	21.1466	182.037	0.0742015
Mianyang City	Sichuan	22192.4	0	0.434399	0.422487	-2.74216	98.5943	285.452	2.94611	50.1528	437.145	0.159417	16804.3	0	0.328931	0.320946	-2.42771	98.5943	229.742	50.4014	37.498	416.235	0.171451	22192.4	0	0.434399	0.421029	-3.07777	98.5943	246.6	41.1421	35.8362	422.172	0.137168
Zigong City	Sichuan	12515.5	0	1.22896	1.11512	-9.26272	51.5663	160.22	3.4152	22.8673	238.068	0.0257017	9176.22	0	0.901056	0.834489	-7.38763	51.5663	128.95	58.4266	17.0974	256.041	0.034658	12515.5	0	1.22896	1.1102	-9.66315	51.5663	138.412	47.693	16.3396	254.011	0.0262865
Ziyang City	Sichuan	11707.8		1.62121	1.52816	-5.73966	32.1279	99.4529	2.94182	16.329	150.852	0.0262823	7699.88		1.06622	1.02359	-3.99833	32.1279	80.0431	50.3281	12.2088	174.708	0.043695	11707.8		1.62121	1.52613	-5.86463	32.1279	85.9164	41.0822	11.6677	170.794	0.0291228
Dazhou City	Sichuan	14247.3	0	0.355983	0.34929	-1.8802	69.027	144.867	2.00576	37.2247	253.125	0.134627	9918.59	0	0.247826	0.243958	-1.56049	69.027	116.594	34.3142	27.832	247.767	0.158775	14247.3	0	0.355983	0.348499	-2.10224	69.027	125.149	28.0103	26.5985	248.785	0.118343
Suining City	Sichuan	13068	0	1.06408	0.96842	-8.99037	49.7316	186.232	2.2963	36.2076	274.468	0.030529	10211	0	0.831447	0.767782	-7.65715	49.7316	149.886	39.2847	27.0716	265.974	0.0347353	13068	0	1.06408	0.963106	-9.48978	49.7316	160.884	32.0677	25.8718	268.555	0.0282994
Aba Zang & Qiang A.P	Sichuan	2480.56	0	0.0216453	0.0216279	-0.080387	26.4773	21.0894	2.36049	3.21	53.1372	0.66127	1631.52	0	0.0142366	0.0142091	-0.193164	26.4773	16.9735	40.3828	2.40004	86.2337	0.44546	2480.56	0	0.0216453	0.0216017	-0.201429	26.4773	18.219	32.9641	2.29367	79.954	0.39674
Yaan City	Sichuan	4232.53	0	0.139546	0.138995	-0.394779	25.1064	48.8324	2.67987	18.2221	94.8407	0.240259	2899.13	0	0.095584	0.0951833	-0.419212	25.1064	39.302	45.8467	13.6242	123.879	0.295472	4232.53	0	0.139546	0.138809	-0.528212	25.1064	42.1859	37.4241	13.0204	117.737	0.222919
Tianjin	Tianjin	61723.5	13758.4	4.67728	2.95608	-36.7993	456.786	961.859	95.6403	1259.69	2773.97	0.0753811	44469.3	9912.36	3.3698	2.31189	-31.3939	456.786	733.464	137.436	916.472	2244.16	0.0714838	61723.5	13758.4	4.67728	2.89382	-38.1303	456.786	868.804	116.403	778.776	2220.77	0.0582416
Urumqi City	Xinjiang	5562.66	3838.47	1.09884	1.01754	-7.39819	195.908	317.967	80.1047	672.071	1266.05	0.171128	4799.08	3311.56	0.948	0.833641	-12.0632	195.908	235.554	193.432	492.343	1117.24	0.0926155	5562.66	3838.47	1.09884	0.943812	-14.108	195.908	280.581	161.824	295.542	933.854	0.0661932
111 Kazak A.P	Xinjiang	0					13.6601	0	36.935	0	50.5951		0					13.6601	0	89.1883	0	102.848		0					13.6601	0	74.6143	0	88.2744
Ili	Xinjiang	2998.76	0	0.0905009	0.0897188	-0.86419	74.0012	60.6203	36.935	184.645	356.202	0.412221	1872.23	0	0.0565028	0.0551034	-2.47669	74.0012	44.9083	89.1883	135.267	343.365	0.138646	2998.76	0	0.0905009	0.0885051	-2.20528	74.0012	53.4927	74.6143	81.1973	283.305	0.128468
Kizilsu Kirgiz A.P	Xinjiang	0		0.785072	0.78501	-0.00792284	8.84159	2.61612	18.078	3.48874	33.0244	4.17043	0		0.459648	0.459513	-0.0293921	8.84159	1.93806	43.6536	2.55577	56.989	1.93858	0		0.785072	0.784887	-0.0235902	8.84159	2.30852	36.5202	1.53417	49.2045	2.08523
Karamay City	Xinjiang	0	1054.3	12.4637	12.2739	-1.52258	25.7437	76.1361	141.173	115.015	358.068	0.235167	0	909.702	10.7542	10.3418	-3.83505	25.7437	56.4027	340.897	84.257	507.3	0.132281	0	1054.3	12.4637	11.8983	-4.5367	25.7437	67.1843	285.192	50.5774	428.697	0.0944948
Bortala Mongolian A.P	Xinjiang	0	363.137	1.33617	1.33557	-0.0449793	23.8884	9.82242	64.2659	34.1802	132.157	2.93558	0	256.075	0.94223	0.940923	-0.138745	23.8884	7.27658	155.185	25.0396	211.39	1.52357	0	363.137	1.33617	1.33438	-0.134115	23.8884	8.66753	129.827	15.0307	177.413	1.32253
Turpan Prefecture	Xinjiang	0		317.263	317.263		15.4501	0.0861317	34.9286	21.6573	72.1221		0		148.553	148.553		15.4501	0.0638075	84.3434	15.8656	115.723	5633.12	0		317.263	317.263		15.4501	0.0760046	70.5611	9.52375	95.6109	9939.77
Hotan Prefecture	Xinjiang	0					12.2523	0	11.0071	39.5111	62.7705		0					12.2523	0	26.5793	28.9449	67.7765		0					12.2523	0	22.236	17.3749	51.8633
Hami Prefecture	Xinjiang	0	803.839	1.37769	1.37551	-0.158018	25.4219	19.7087	73.9939	9.27359	128.398	0.812286	0	600.128	1.02855	1.02382	-0.460162	25.4219	14.6005	178.676	6.79362	225.492	0.490055	0	803.839	1.37769	1.3712	-0.470934	25.4219	17.3914	149.479	4.07804	196.37	0.416937
Kashi Prefecture	Xinjiang	0	466.251	2.69132	2.68977	-0.0575926	51.4016	79.017	18.7827	165.359	314.56	5.46111	0	349.46	2.01717	2.01381	-0.167016	51.4016	58.5369	45.3552	121.138	276.432	1.65519	0	466.251	2.69132	2.6867	-0.171626	51.4016	69.7264	37.9439	72.7161	231.788	1.35058
Tacheng Prefecture	Xinjiang	0	0	1.79347	1.79269	-0.0436583	25.4544	31.0981	49.5283	54.7708	160.851	3.6828	0	0	1.19092	1.18922	-0.142915	25.4544	23.0379	119.598	40.1238	208.214	1.45644	0	0	1.79347	1.79114	-0.130139	25.4544	27.4417	100.055	24.0853	177.036	1.36023
Bayingolin Mongolian A.P	Xinjiang	67.1253	12.4306	0.680977	0.68026	-0.105349	38.4898	59.0239	79.3601	74.7283	251.602	2.38828	51.8968	9.61052	0.526487	0.524979	-0.286351	38.4898	43.7257	191.634	54.7442	328.594	1.14749	67.1253	12.4306	0.680977	0.678904	-0.304401	38.4898	52.0841	160.319	32.8616	283.755	0.932188
Changji Hui A.P	Xinjiang	552.837	772.884	2.24499	2.23999	-0.222585	62.0211	47.1111	76.7762	141.805	327.713	1.47251	403.829	564.565	1.63989	1.63409	-0.353317	62.0211	34.9006	185.394	103.883	386.199	1.09303	552.837	772.884	2.24499	2.23622	-0.390692	62.0211	41.572	155.099	62.3583	321.051	0.821798
Aksu Prefecture	Xinjiang	358.041	1688.66	3.20418	3.20061	-0.111479	56.9378	74.3392	30.6852	176.266	338.228	3.03361	263.606	1243.27	2.35907	2.35414	-0.208853	56.9378	55.0715	74.0968	129.128	315.234	1.50953	358.041	1688.66	3.20418	3.19699	-0.224706	56.9378	65.5986	61.9888	77.5126	262.038	1.16613
Altay Prefecture	Xinjiang	0	1492.12	0.681495	0.681283	-0.0310201	29.0296	14.6874	37.7098	17.4248	98.8516	3.18643	0	1035.73	0.473048	0.472589	-0.0971571	29.0296	10.8806	91.0592	12.765	143.734	1.47965	0	1492.12	0.681495	0.680865	-0.0924439	29.0296	12.9605	76.1794	7.66254	125.832	1.36113
Lincang City	Yunnan	2724.44	0	0.190224	0.189782	-0.232463	33.1431	19.1671	1.7619	23.7263	77.7984	0.334688	1845.55	0	0.128858	0.128406	-0.351083	33.1431	15.2113	27.0173	18.2033	93.5751	0.266524	2724.44	0	0.190224	0.189464	-0.399476	33.1431	17.9286	21.5153	13.9785	86.5654	0.216706
Lijiang City	Yunnan	3969.56	870.165	0.162293	0.161162	-0.697195	62.5718	25.2875	1.98945	50.5144	140.363	0.201312	3124	684.81	0.127723	0.126353	-1.0724	62.5718	20.0686	30.5067	38.7556	151.903	0.141651	3969.56	870.165	0.162293	0.160301	-1.22753	62.5718	23.6535	24.294	29.7608	140.28	0.114278
Baoshan City	Yunnan	6741.31		0.18479	0.18368	-0.60025	40.1703	33.1491	1.88186	53.3589	128.56	0.214181	4971.89		0.136287	0.13523	-0.775716	40.1703	26.3077	28.8569	40.938	136.273	0.175682	6741.31		0.18479	0.1831	-0.914283	40.1703	31.0071	22.9802	31.4367	125.594	0.137375
Dali Bai A.P	Yunnan	2338.88	21.9317	0.375721	0.374441	-0.340705	90.8012	43.2161	2.23421	83.1977	219.449	0.644104	1654.75	15.5166	0.265821	0.264236	-0.596379	90.8012	34.297	34.2598	63.8309	223.189	0.374246	2338.88	21.9317	0.375721	0.373235	-0.661714	90.8012	40.4236	27.2828	49.0164	207.524	0.313608
Dehong Dai & Jingpo A.P	Yunnan	274.254		0.121975	0.121929	-0.0375486	35.6067	16.8816	2.01754	32.7414	87.2473	2.32025	200.826		0.0893177	0.0890646	-0.28337	35.6067	13.3975	30.9373	25.1198	105.061	0.370686	274.254		0.121975	0.121636	-0.277843	35.6067	15.7908	24.637	19.2898	95.3242	0.343029
Nujiang Lisu A.P	Yunnan	284.013	1.29032	0.0428412	0.0428306	-0.0247425	18.5132	2.51113	1.83369	5.37166	28.2297	1.14796	173.982	0.790427	0.0262438	0.0262119	-0.121553	18.5132	1.99287	28.1181	4.12124	52.7454	0.434139	284.013	1.29032	0.0428412	0.0427953	-0.10714	18.5132	2.34887	22.3919	3.16474	46.4187	0.433013
Puer City	Yunnan	2965.72	0	0.0788575	0.0787658	-0.116286	50.6665	27.7929	1.73522	57.8315	138.026	1.18703	2145.49	0	0.0570477	0.0568485	-0.349181	50.6665	22.0569	26.6083	44.3694	143.701	0.411647	2965.72	0	0.0788575	0.0785722	-0.361792	50.6665	25.997	21.1895	34.0717	131.925	0.364664
Wenshan Zhuang & Miao A.P	Yunnan	6459.4	7.4885	0.135852	0.135313	-0.396902	38.5016	27.6633	1.63333	68.2611	136.059	0.342776	4441.51	5.14912	0.0934124	0.0928965	-0.552282	38.5016	21.954	25.0459	52.3712	137.873	0.249624	6459.4	7.4885	0.135852	0.134981	-0.64158	38.5016	25.8758	19.9453	40.2164	124.539	0.19412
Kunming City	Yunnan	38530.4	21.2683	0.360954	0.340532	-5.6577	293.471	373.463	5.23524	1197.76	1869.93	0.33051	33931.6	18.7298	0.317872	0.293623	-7.62853	293.471	296.386	80.2783	918.946	1589.08	0.208307	38530.4	21.2683	0.360954	0.329754	-8.64363	293.471	349.33	63.9296	705.668	1412.4	0.163403
Zhaotong City	Yunnan	4109.24	3.13517	0.137875	0.137406	-0.339729	53.4245	43.7684	1.14935	75.0209	173.363	0.510344	3046.39	2.32426	0.102214	0.101432	-0.764575	53.4245	34.7353	17.6244	57.5575	163.342	0.213638	4109.24	3.13517	0.137875	0.136734	-0.827128	53.4245	40.9402	14.0352	44.199	152.599	0.184502
Qujing City	Yunnan	4241.62	72.6657	0.201804	0.201182	-0.307973	70.4092	81.3094	2.37339	164.034	318.126	1.03295	3015.54	51.661	0.143471	0.142315	-0.805601	70.4092	64.5285	36.3941	125.85	297.182	0.368911	4241.62	72.6657	0.201804	0.200106	-0.841015	70.4092	76.0555	28.9825	96.6415	272.089	0.323533
Chuxiong Yi A.P	Yunnan	9127.29	0	0.351072	0.344783	-1.79145	67.3661	47.1417	2.45211	111.183	228.143	0.127351	6766.34	0	0.260261	0.255345	-1.88868	67.3661	37.4125	37.6012	85.3017	227.681	0.120549	9127.29	0	0.351072	0.342939	-2.31682	67.3661	44.0956	29.9437	65.5041	206.909	0.0893076
Yuxi City	Yunnan	5203.57	0	0.539341	0.532576	-1.25436	62.7344	45.7801	4.63463	116.758	229.907	0.183286	3507.54	0	0.36355	0.358734	-1.32469	62.7344	36.3318	71.0684	89.5792	259.714	0.196056	5203.57	0	0.539341	0.53038	-1.66147	62.7344	42.8219	56.5953	68.7888	230.94	0.138997
Honghe Hani & Yi A.P	Yunnan	11317.1	0	0.193475	0.192038	-0.743092	94.4129	66.794	2.31196	82.8585	246.377	0.331545	8204.49	0	0.140262	0.138834	-1.01838	94.4129	53.0089	35.4521	63.5706	246.445	0.242011	11317.1	0	0.193475	0.191179	-1.18677	94.4129	62.478	28.2323	48.8165	233.94	0.197122
Xishuangbanna Dai A.P	Yunnan	3832.01		0.119419	0.118934	-0.406133	24.6493	17.6032	2.54013	36.4607	81.2533	0.200071	2755.97		0.0858858	0.0853518	-0.621756	24.6493	13.9702	38.9509	27.9733	105.544	0.169759	3832.01		0.119419	0.118572	-0.7091	24.6493	16.4657	31.0186	21.481	93.6146	0.132018
Diqing Zang A.P	Yunnan	0		0.045865	0.0458579	-0.0154802	18.3009	5.02159	3.47018	2.66667	29.4594	1.90492	0		0.0299785	0.0298806	-0.326567	18.3009	3.98522	53.2125	2.04592	77.5445	0.237438	0		0.045865	0.0457373	-0.278426	18.3009	4.69711	42.3758	1.57108	66.9449	0.240302
Lishui City	Zhejiang	12053.8	2.13241	0.0588314	0.0582601	-0.97108	74.3763	116.879	1.81243	64.3939	257.462	0.265093	8885.24	1.57186	0.0433665	0.0429034	-1.06787	74.3763	102.205	2.12527	52.8717	231.578	0.216868	12053.8	2.13241	0.0588314	0.0581702	-1.12389	74.3763	106.179	1.60061	34.3497	216.506	0.192631
Taizhou City	Zhejiang	14171.6	3515.12	0.23311	0.227616	-2.35679	287.169	397.119	2.06639	196.354	882.708	0.37454	11883.7	2947.63	0.195476	0.190749	-2.4181	287.169	347.26	2.42307	161.219	798.071	0.330044	14171.6	3515.12	0.23311	0.226883	-2.67136	287.169	360.763	1.8249	104.741	754.498	0.282442
Jiaxing City	Zhejiang	10107.6	711.611	0.717454	0.693276	-3.36997	129.692	360.017	2.69536	265.208	757.612	0.224813	8373.56	589.531	0.594372	0.575502	-3.17475	129.692	314.816	3.16059	217.754	665.422	0.209599	10107.6	711.611	0.717454	0.691478	-3.62065	129.692	327.058	2.38035	141.47	600.6	0.165882
Ningbo City	Zhejiang	32835.4	6967.41	0.230298	0.219658	-4.62024	338.977	943.939	3.59056	525.451	1811.96	0.392179	27732.6	5884.64	0.194508	0.185242	-4.76376	338.977	825.425	4.21032	431.43	1600.04	0.335877	32835.4	6967.41	0.230298	0.218207	-5.2499	338.977	857.522	3.17093	280.292	1479.96	0.281902
Hangzhou City	Zhejiang	49243.9	11514.8	0.268263	0.261316	-2.58936	408.574	569.167	3.93624	257.5	1239.18	0.478567	37097	8674.45	0.202091	0.197378	-2.33202	408.574	497.707	4.61566	211.425	1122.32	0.481263	49243.9	11514.8	0.268263	0.260853	-2.76211	408.574	517.061	3.47621	137.358	1066.47	0.386106
Wenzhou City	Zhejiang	46379.9	71.3045	0.219512	0.210707	-4.01139	318.734	600.183	1.78136	393.04	1313.74	0.327501	35449.3	54.4999	0.167779	0.161434	-3.78188	318.734	524.828	2.08883	322.712	1168.36	0.308937	46379.9	71.3045	0.219512	0.209963	-4.3501	318.734	545.236	1.57317	209.66	1075.2	0.247168
Huzhou City	Zhejiang	16541.4	2839.14	0.349818	0.336856	-3.70558	232.803	348.517	2.48646	217.71	801.517	0.2163	14560	2499.05	0.307915	0.296806	-3.60794	232.803	304.76	2.91564	178.754	719.234	0.199348	16541.4	2839.14	0.349818	0.335744	-4.02332	232.803	316.611	2.19587	116.133	667.743	0.165968
Shaoxing City	Zhejiang	20537.5	963.462	0.299497	0.292073	-2.47866	65.6183	293.551	3.15667	146.341	508.667	0.205218	15877.6	744.857	0.231543	0.226272	-2.27613	65.6183	256.695	3.70154	120.156	446.17	0.196022	20537.5	963.462	0.299497	0.291537	-2.65759	65.6183	266.676	2.78775	78.0629	413.145	0.155458
Zhoushan City	Zhejiang	0	354.694	0.232008	0.228521	-1.50322	51.1124	62.5658	3.3359	47.8561	164.87	0.109676	0	267.717	0.175116	0.171435	-2.10181	51.1124	54.7105	3.91169	39.2931	149.028	0.0709033	0	354.694	0.232008	0.227466	-1.95803	51.1124	56.838	2.94603	25.5279	136.424	0.0696738
Quzhou City	Zhejiang	5973.64	355.643	0.114062	0.113083	-0.858482	96.9052	141.28	1.88857	50.4609	290.535	0.338429	5074.22	302.096	0.0968881	0.0959926	-0.924262	96.9052	123.542	2.21456	41.4318	264.094	0.285741	5973.64	355.643	0.114062	0.112912	-1.00823	96.9052	128.346	1.66786	26.9174	253.836	0.251763
Jinhua City	Zhejiang	38620.6	1399.85	0.165701	0.158874	-4.12043	274.529	512.629	2.19136	261.212	1050.56	0.254963	33608.7	1218.19	0.144198	0.138305	-4.08654	274.529	448.267	2.5696	214.473	939.839	0.229986	38620.6	1399.85	0.165701	0.158162	-4.55012	274.529	465.699	1.93526	139.339	881.502	0.193729
Chongqing	Chongqing	141078	3857.16	0.303806	0.296692	-2.34159	900.859	1371.51	32.6459	3480.62	5785.64	2.47081	96118.1	2627.93	0.206987	0.199841	-3.4522	900.859	993.772	251.175	2443.04	4588.84	1.32926	141078	3857.16	0.303806	0.29131	-4.11319	900.859	1113.45	224.958	2171.38	4410.64	1.07232

## Sheet:  cities_WWTPs inventory (2030)
city	province	effluent_I_B_BAU	relcaimed_water_BAU	wsi_BAU	wsi'_BAU	deltawsi_BAU	CI_construction_BAU	CI_wastewater_BAU	CI_relcaimed_water_BAU	CI_sludge_disposal_BAU	CI_total_BAU	CIWSA_BAU	effluent_I_B_WRE	relcaimed_water_WRE	wsi_WRE	wsi’_WRE	deltawsi_WRE	CI_construction_WRE	CI_wastewater_WRE	CI_relcaimed_water_WRE	CI_sludge_disposal_WRE	CI_total_WRE	CIWSA_WRE	effluent_I_B_WRE_LCR	relcaimed_water_WRE_LCR	wsi_WRE_LCR	wsi‘_WRE_LCR	deltawsi_WRE_LCR	CI_construction_WRE_LCR	CI_wastewater_WRE_LCR	CI_relcaimed_water_WRE_LCR	CI_sludge_disposal_WRE_LCR	CI_total_WRE_LCR	CIWSA_WRE_LCR
Bozhou City	Anhui	12045	433.008	0.0299219	0.0245959	-17.7997	34.19	98.9484	0.775733	182.666	316.58	0.0177857	12045	433.008	0.0299219	0.0174242	-41.7677	34.19	98.9484	2.24385	182.666	318.048	0.0076147	12045	433.008	0.0299219	0.0174242	-41.7677	34.19	91.093	1.52133	54.0902	180.894	0.004331
Liuan City	Anhui	10837.6		0.0090311	0.0082322	-8.8461	57.0729	99.9755	0.889504	179.312	337.25	0.0381234	10837.6		0.0090311	0.0068688	-23.9428	57.0729	99.9755	2.57294	179.312	338.934	0.0141559	10837.6		0.0090311	0.0068688	-23.9428	57.0729	92.0385	1.74446	53.0971	203.953	0.0085183
Hefei City	Anhui	42803.1	1609.65	0.160393	0.141765	-11.614	176.47	332.972	3.02102	796.367	1308.83	0.112694	42803.1	1609.65	0.160393	0.131067	-18.2839	176.47	332.972	8.7385	796.367	1314.55	0.0718966	42803.1	1609.65	0.160393	0.131067	-18.2839	176.47	306.538	5.9247	235.817	724.748	0.0396387
Anqing City	Anhui	23904	0	0.0186313	0.0175213	-5.95772	26.2268	106.006	1.28528	111.686	245.204	0.0411594	23904	0	0.0186313	0.0160901	-13.6394	26.2268	106.006	3.71776	111.686	247.636	0.0181562	23904	0	0.0186313	0.0160901	-13.6394	26.2268	97.5903	2.52064	33.0719	159.41	0.0116876
Xuancheng City	Anhui	16354.4	15.6263	0.00532	0.0047024	-11.609	48.573	78.5422	1.55428	102.686	231.355	0.0199286	16354.4	15.6263	0.00532	0.0036619	-31.1673	48.573	78.5422	4.49584	102.686	234.296	0.0075172	16354.4	15.6263	0.00532	0.0036619	-31.1673	48.573	72.3067	3.04818	30.4067	154.335	0.0049517
Suzhou City	Anhui	14357.2	0	0.0457796	0.0391211	-14.5447	44.1717	103.443	0.926325	122.763	271.304	0.0186533	14357.2	0	0.0457796	0.0317405	-30.6667	44.1717	103.443	2.67945	122.763	273.058	0.0089041	14357.2	0	0.0457796	0.0317405	-30.6667	44.1717	95.2311	1.81667	36.352	177.571	0.0057904
Chaohu City	Anhui	3575.76	0				33.5397	50.583	0	110.253	194.375		3575.76	0				33.5397	50.583	0	110.253	194.375		3575.76	0				33.5397	46.5672	0	32.6475	112.754
Chizhou City	Anhui	6607.66		0.0067171	0.0063438	-5.55746	16.4728	38.2022	1.57097	29.6076	85.8536	0.0154454	6607.66		0.0067171	0.0057181	-14.8725	16.4728	38.2022	4.54413	29.6076	88.8268	0.0059722	6607.66		0.0067171	0.0057181	-14.8725	16.4728	35.1694	3.08092	8.76727	63.4904	0.0042687
Huaibei City	Anhui	7481.39	8722.74	0.157067	0.125181	-20.3013	36.466	108.379	1.44877	106.955	253.249	0.0124745	7481.39	8722.74	0.157067	0.097838	-37.7095	36.466	108.379	4.19066	106.955	255.991	0.0067885	7481.39	8722.74	0.157067	0.097838	-37.7095	36.466	99.775	2.84127	31.671	170.753	0.0045281
Huainan City	Anhui	16026.8	0	0.208928	0.173966	-16.7337	32.6936	76.4888	1.09093	103.053	213.327	0.0127483	16026.8	0	0.208928	0.162701	-22.1255	32.6936	76.4888	3.15557	103.053	215.392	0.009735	16026.8	0	0.208928	0.162701	-22.1255	32.6936	70.4164	2.13948	30.5157	135.765	0.0061361
Chuzhou City	Anhui	21244.4	0	0.0222076	0.0192752	-13.2045	42.2557	133.408	1.34864	214.901	391.913	0.029681	21244.4	0	0.0222076	0.0152933	-31.1348	42.2557	133.408	3.90102	214.901	394.466	0.0126697	21244.4	0	0.0222076	0.0152933	-31.1348	42.2557	122.816	2.64489	63.6356	231.353	0.0074308
Wuhu City	Anhui	24445.7	0	0.0762361	0.0687087	-9.8738	53.2613	159.449	2.79332	224.26	439.764	0.0445381	24445.7	0	0.0762361	0.062518	-17.9942	53.2613	159.449	8.07984	224.26	445.05	0.0247329	24445.7	0	0.0762361	0.062518	-17.9942	53.2613	146.791	5.47813	66.4067	271.937	0.0151124
Bengbu City	Anhui	11884	0	0.150149	0.135768	-9.57786	27.8777	153.712	1.58143	303.497	486.668	0.0508117	11884	0	0.150149	0.123896	-17.4852	27.8777	153.712	4.57438	303.497	489.661	0.0280043	11884	0	0.150149	0.123896	-17.4852	27.8777	141.508	3.10143	89.8702	262.358	0.0150046
Tongling City	Anhui	8853.45	0	0.130765	0.114898	-12.1343	17.8256	50.154	2.37158	45.4177	115.769	0.0095406	8853.45	0	0.130765	0.106486	-18.5672	17.8256	50.154	6.85995	45.4177	120.257	0.0064768	8853.45	0	0.130765	0.106486	-18.5672	17.8256	46.1723	4.65105	13.4489	82.0978	0.0044216
Fuyang City	Anhui	21719.7	4884.45	0.0497274	0.0431272	-13.2728	44.7429	118.216	0.666219	173.088	336.713	0.0253686	21719.7	4884.45	0.0497274	0.0369346	-25.7259	44.7429	118.216	1.92708	173.088	337.974	0.0131375	21719.7	4884.45	0.0497274	0.0369346	-25.7259	44.7429	108.83	1.30656	51.2541	206.134	0.0080127
Maanshan City	Anhui	12061.1	0	0.110619	0.101276	-8.44648	38.4123	94.4152	2.51271	136.401	271.741	0.0321722	12061.1	0	0.110619	0.0944036	-14.6587	38.4123	94.4152	7.26817	136.401	276.496	0.0188623	12061.1	0	0.110619	0.0944036	-14.6587	38.4123	86.9197	4.92782	40.3903	170.65	0.0116416
Huangshan City	Anhui	9739.77	0	0.0060238	0.0056977	-5.41353	23.5283	48.0423	1.60321	57.8125	130.986	0.0241966	9739.77	0	0.0060238	0.0051544	-14.4328	23.5283	48.0423	4.63737	57.8125	134.02	0.0092861	9739.77	0	0.0060238	0.0051544	-14.4328	23.5283	44.2282	3.14414	17.1192	88.0199	0.0060988
Beijing	Beijing	137819	46773.7	4.81152	2.72862	-43.2899	376.343	1408.27	2751.57	502.019	5038.2	0.116383	137819	46773.7	4.81152	2.69037	-44.0849	376.343	1408.27	3518.56	502.019	5805.2	0.131682	137819	46773.7	4.81152	2.69037	-44.0849	376.343	1148.17	2385.59	270.168	4180.26	0.094823
Sanming City	Fujian	13359	0	0.210214	0.208972	-0.590779	32.7065	58.3501	0.389705	34.6491	126.095	0.213435	13359	0	0.210214	0.208686	-0.726831	32.7065	58.3501	1.04318	34.6491	126.749	0.174387	13359	0	0.210214	0.208686	-0.726831	32.7065	53.4125	0.707278	11.9977	98.8239	0.135966
Nanping City	Fujian	15355.5	18.7934	0.261753	0.260398	-0.51793	26.1565	53.641	0.291984	35.8189	115.908	0.22379	15355.5	18.7934	0.261753	0.260187	-0.598464	26.1565	53.641	0.781597	35.8189	116.398	0.194487	15355.5	18.7934	0.261753	0.260187	-0.598464	26.1565	49.1018	0.529922	12.4028	88.191	0.147357
Xiamen City	Fujian	0	442.435	0.804291	0.790734	-1.68565	66.5575	238.563	0.518126	259.663	565.302	0.335364	0	442.435	0.804291	0.768	-4.51221	66.5575	238.563	1.38695	259.663	566.17	0.125475	0	442.435	0.804291	0.768	-4.51221	66.5575	218.376	0.940349	89.9116	375.785	0.083282
Ningde City	Fujian	5492.83	0	0.250142	0.248901	-0.495958	26.5133	82.2299	0.29814	192.172	301.214	0.607338	5492.83	0	0.250142	0.248247	-0.75737	26.5133	82.2299	0.798078	192.172	301.714	0.398363	5492.83	0	0.250142	0.248247	-0.75737	26.5133	75.2715	0.541097	66.5422	168.868	0.222963
Quanzhou City	Fujian	16483.8	7766.21	0.684878	0.670096	-2.15843	118.275	290.013	0.415176	225.264	633.967	0.293717	16483.8	7766.21	0.684878	0.66602	-2.75357	118.275	290.013	1.11136	225.264	634.664	0.230487	16483.8	7766.21	0.684878	0.66602	-2.75357	118.275	265.472	0.753505	78.0005	462.501	0.167964
Zhangzhou City	Fujian	19443.7	142.404	0.362766	0.356632	-1.69109	62.615	104.634	0.318572	96.872	264.44	0.156374	19443.7	142.404	0.362766	0.355582	-1.98045	62.615	104.634	0.852771	96.872	264.974	0.133795	19443.7	142.404	0.362766	0.355582	-1.98045	62.615	95.7801	0.578179	33.5432	192.516	0.0972087
Fuzhou City	Fujian	36088.1	0	0.67212	0.649338	-3.38956	90.6857	194.491	0.431446	175.911	461.519	0.136159	36088.1	0	0.67212	0.647128	-3.71849	90.6857	194.491	1.15492	175.911	462.243	0.12431	36088.1	0	0.67212	0.647128	-3.71849	90.6857	178.033	0.783033	60.9115	330.413	0.0888571
Putian City	Fujian	15146.5	0	0.562144	0.53932	-4.06019	18.2248	73.2889	0.331775	71.0701	162.916	0.040125	15146.5	0	0.562144	0.536953	-4.48134	18.2248	73.2889	0.888112	71.0701	163.472	0.0364782	15146.5	0	0.562144	0.536953	-4.48134	18.2248	67.0871	0.60214	24.609	110.523	0.0246628
Longyan City	Fujian	5463.02	0	0.205876	0.204986	-0.432687	41.1052	86.2566	0.383313	55.4517	183.197	0.423411	5463.02	0	0.205876	0.204433	-0.701197	41.1052	86.2566	1.02607	55.4517	183.839	0.262191	5463.02	0	0.205876	0.204433	-0.701197	41.1052	78.9574	0.695677	19.2009	139.959	0.199609
Linxia Hui A.P	Gansu	3534.59		2.62538	2.37837	-9.40872	16.4739	29.5353	1.11693	56.0883	103.214	0.0109701	3534.59		2.62538	2.35874	-10.1563	16.4739	29.5353	2.98522	56.0883	105.083	0.0103466	3534.59		2.62538	2.35874	-10.1563	16.4739	27.0541	2.02398	20.6503	66.2022	0.0065184
Lanzhou City	Gansu	19608.7	818.549	11.2571	5.32287	-52.7153	96.6203	255.046	6.04479	1047.02	1404.73	0.0266475	19608.7	818.549	11.2571	5.14637	-54.2833	96.6203	255.046	16.156	1047.02	1414.84	0.026064	19608.7	818.549	11.2571	5.14637	-54.2833	96.6203	233.62	10.9537	385.485	726.679	0.0133868
Jiayuguan City	Gansu	0	4295.4	42.2895	40.2806	-4.75021	18.0379	75.1328	8.31154	197.739	299.221	0.062991	0	4295.4	42.2895	36.9204	-12.6959	18.0379	75.1328	22.2143	197.739	313.124	0.0246633	0	4295.4	42.2895	36.9204	-12.6959	18.0379	68.821	15.0613	72.8023	174.722	0.0137621
Tianshui City	Gansu	7011.39		1.58032	1.4167	-10.3539	40.4353	51.5468	1.77645	130.53	224.288	0.0216622	7011.39		1.58032	1.3981	-11.5305	40.4353	51.5468	4.74794	130.53	227.26	0.0197094	7011.39		1.58032	1.3981	-11.5305	40.4353	47.2164	3.2191	48.0577	138.929	0.0120488
Dingxi City	Gansu	2455.43		1.63887	1.59209	-2.85477	26.2464	18.4085	1.16573	76.9237	122.744	0.0429962	2455.43		1.63887	1.58685	-3.17413	26.2464	18.4085	3.11566	76.9237	124.694	0.0392845	2455.43		1.63887	1.58685	-3.17413	26.2464	16.862	2.11242	28.3213	73.5422	0.0231692
Pingliang City	Gansu	2977.84		1.59211	1.50627	-5.3911	28.4691	24.0001	1.96181	41.0725	95.5035	0.0177149	2977.84		1.59211	1.49572	-6.05381	28.4691	24.0001	5.24335	41.0725	98.785	0.0163178	2977.84		1.59211	1.49572	-6.05381	28.4691	21.9839	3.55499	15.1218	69.1298	0.0114192
Qingyang City	Gansu	7032.08	0	3.34922	2.87276	-14.2259	26.3654	20.6672	2.90356	88.0575	137.994	0.0097002	7032.08	0	3.34922	2.86195	-14.5487	26.3654	20.6672	7.76038	88.0575	142.851	0.0098188	7032.08	0	3.34922	2.86195	-14.5487	26.3654	18.931	5.26154	32.4205	82.9785	0.0057035
Zhangye City	Gansu	5075.58	0	1.93268	1.90175	-1.60042	21.0778	36.6671	3.25773	53.1409	114.144	0.0713215	5075.58	0	1.93268	1.89889	-1.74855	21.0778	36.6671	8.70696	53.1409	119.593	0.0683967	5075.58	0	1.93268	1.89889	-1.74855	21.0778	33.5868	5.90332	19.5651	80.133	0.0458291
Wuwei City	Gansu	493.021	0	5.027	4.99833	-0.570181	25.9744	31.3279	2.43301	132.11	191.845	0.336461	493.021	0	5.027	4.99041	-0.72785	25.9744	31.3279	6.50271	132.11	195.915	0.269168	493.021	0	5.027	4.99041	-0.72785	25.9744	28.6961	4.40884	48.6394	107.719	0.147995
Gannan Zang A.P	Gansu	419.22	0	0.0510952	0.050879	-0.423132	17.6667	7.41857	1.90876	8.14542	35.1394	0.0830642	419.22	0	0.0510952	0.0505737	-1.02064	17.6667	7.41857	5.10156	8.14542	38.3322	0.0375606	419.22	0	0.0510952	0.0505737	-1.02064	17.6667	6.79535	3.45886	2.99893	30.9198	0.0302974
Baiyin City	Gansu	0	0	19.682	19.6626	-0.0986181	21.4708	23.9995	2.69603	114.453	162.62	1.64922	0	0	19.682	19.6301	-0.26354	21.4708	23.9995	7.2057	114.453	167.129	0.634165	0	0	19.682	19.6301	-0.26354	21.4708	21.9834	4.88547	42.1387	90.4784	0.343317
Jiuquan City	Gansu	4416.01	338.435	3.40175	3.34063	-1.79649	22.6952	44.8521	5.19047	131.649	204.387	0.113771	4416.01	338.435	3.40175	3.33607	-1.93077	22.6952	44.8521	13.8726	131.649	213.069	0.110354	4416.01	338.435	3.40175	3.33607	-1.93077	22.6952	41.0842	9.40563	48.4697	121.655	0.0630083
Jinchang City	Gansu	0	456.125	20.3553	20.2927	-0.307341	23.6427	31.25	5.06516	88.2344	148.192	0.482197	0	456.125	20.3553	20.1881	-0.82141	23.6427	31.25	13.5377	88.2344	156.665	0.190733	0	456.125	20.3553	20.1881	-0.82141	23.6427	28.6247	9.17856	32.4856	93.9316	0.114358
Longnan City	Gansu	3042.74	0	0.216059	0.213141	-1.35033	26.5053	19.6858	1.29146	26.3186	73.8011	0.0546556	3042.74	0	0.216059	0.211583	-2.07157	26.5053	19.6858	3.4517	26.3186	75.9614	0.0366684	3042.74	0	0.216059	0.211583	-2.07157	26.5053	18.0321	2.34025	9.68982	56.5674	0.0273065
Dongguan City	Guangdong	95615.8	297.451	1.07587	0.751987	-30.1044	154.397	1237.77	1.60078	628.255	2022.02	0.0671669	95615.8	297.451	1.07587	0.709763	-34.029	154.397	1237.77	5.80192	628.255	2026.22	0.0595439	95615.8	297.451	1.07587	0.709763	-34.029	154.397	1093.82	3.9337	229.953	1482.1	0.043554
ZhongShan City	Guangdong	35613.2	16.169	1.3965	1.13275	-18.8866	155.674	519.087	1.99061	354.546	1031.3	0.0546048	35613.2	16.169	1.3965	1.10272	-21.0365	155.674	519.087	7.2148	354.546	1036.52	0.0492725	35613.2	16.169	1.3965	1.10272	-21.0365	155.674	458.718	4.89163	129.77	749.053	0.0356073
Yunfu City	Guangdong	11950.4	0	0.633183	0.619799	-2.11369	14.8229	87.087	0.615579	41.359	143.885	0.068073	11950.4	0	0.633183	0.618127	-2.37783	14.8229	87.087	2.23112	41.359	145.5	0.0611905	11950.4	0	0.633183	0.618127	-2.37783	14.8229	76.9588	1.5127	15.1381	108.433	0.0456016
Foshan City	Guangdong	42961.8	1987.53	1.31238	1.16503	-11.2273	171.213	1129.62	2.29268	913.271	2216.4	0.197412	42961.8	1987.53	1.31238	1.13407	-13.5865	171.213	1129.62	8.30964	913.271	2222.41	0.163576	42961.8	1987.53	1.31238	1.13407	-13.5865	171.213	998.246	5.63393	334.274	1509.37	0.111093
Guangzhou City	Guangdong	133720	20232.6	1.68131	1.45691	-13.3471	164.376	1051.13	2.88309	909.463	2127.85	0.159425	133720	20232.6	1.68131	1.44518	-14.0444	164.376	1051.13	10.4495	909.463	2135.42	0.152049	133720	20232.6	1.68131	1.44518	-14.0444	164.376	928.885	7.08478	332.88	1433.23	0.10205
Huizhou City	Guangdong	43181.8	32.3516	0.235058	0.225419	-4.10056	145.254	547.841	1.4021	299.345	993.842	0.242367	43181.8	32.3516	0.235058	0.220615	-6.14461	145.254	547.841	5.08182	299.345	997.522	0.162341	43181.8	32.3516	0.235058	0.220615	-6.14461	145.254	484.127	3.44547	109.566	742.392	0.12082
Jieyang City	Guangdong	22377.4	199.926	0.869941	0.83713	-3.77163	37.0764	139.511	0.661666	43.5439	220.792	0.0585402	22377.4	199.926	0.869941	0.83453	-4.07049	37.0764	139.511	2.39815	43.5439	222.529	0.0546687	22377.4	199.926	0.869941	0.83453	-4.07049	37.0764	123.285	1.62595	15.9379	177.926	0.043711
Meizhou City	Guangdong	14336.8	0	0.323393	0.319802	-1.11026	36.4766	153.742	0.46902	29.5667	220.254	0.198384	14336.8	0	0.323393	0.318616	-1.47712	36.4766	153.742	1.69992	29.5667	221.485	0.149944	14336.8	0	0.323393	0.318616	-1.47712	36.4766	135.861	1.15255	10.8219	184.313	0.124778
Shantou City	Guangdong	2181.74	266.55	1.09792	1.07716	-1.8904	47.7016	325.247	0.714104	259.291	632.953	0.334811	2181.74	266.55	1.09792	1.05695	-3.73116	47.7016	325.247	2.58821	259.291	634.828	0.170139	2181.74	266.55	1.09792	1.05695	-3.73116	47.7016	287.421	1.75481	94.905	431.782	0.115721
Shanwei City	Guangdong	1004.51		0.419857	0.418478	-0.328255	19.0221	90.9773	0.535239	60.279	170.814	0.520388	1004.51		0.419857	0.416729	-0.744993	19.0221	90.9773	1.93993	60.279	172.218	0.23117	1004.51		0.419857	0.416729	-0.744993	19.0221	80.3967	1.31527	22.0632	122.797	0.164831
Jiangmen City	Guangdong	41080.4	492.528	0.408375	0.393121	-3.73529	98.3546	466.989	1.0502	237.25	803.644	0.215148	41080.4	492.528	0.408375	0.388802	-4.79287	98.3546	466.989	3.80635	237.25	806.401	0.16825	41080.4	492.528	0.408375	0.388802	-4.79287	98.3546	412.678	2.58071	86.8379	600.452	0.12528
Heyuan City	Guangdong	13085.5	6.24254	0.258967	0.25648	-0.960391	30.3837	117.122	0.558907	81.6945	229.76	0.239233	13085.5	6.24254	0.258967	0.255628	-1.28943	30.3837	117.122	2.02571	81.6945	231.226	0.179325	13085.5	6.24254	0.258967	0.255628	-1.28943	30.3837	103.501	1.37343	29.9017	165.16	0.128088
Shenzhen City	Guangdong	122729	13962.5	1.92384	1.13338	-41.0875	198.594	1624.45	3.34453	1586.82	3413.21	0.0830718	122729	13962.5	1.92384	1.07318	-44.2168	198.594	1624.45	12.122	1586.82	3421.99	0.077391	122729	13962.5	1.92384	1.07318	-44.2168	198.594	1435.53	8.2187	580.805	2223.14	0.0502782
Qingyuan City	Guangdong	17009.7	33.4506	0.129437	0.128366	-0.827275	50.2395	198.997	0.706906	76.4514	326.395	0.394527	17009.7	33.4506	0.129437	0.127574	-1.43946	50.2395	198.997	2.56212	76.4514	328.25	0.228035	17009.7	33.4506	0.129437	0.127574	-1.43946	50.2395	175.854	1.73712	27.9826	255.813	0.177713
Zhanjiang City	Guangdong	9065.86	0	0.798393	0.78818	-1.2791	46.4928	275.742	0.697189	265.128	588.06	0.459745	9065.86	0	0.798393	0.784375	-1.75577	46.4928	275.742	2.52691	265.128	589.889	0.335972	9065.86	0	0.798393	0.784375	-1.75577	46.4928	243.673	1.71324	97.0415	388.921	0.22151
Chaozhou City	Guangdong	13694.9	19.4988	0.720868	0.691237	-4.11047	15.1832	85.4213	0.718804	46.6575	147.981	0.0360009	13694.9	19.4988	0.720868	0.68842	-4.50129	15.1832	85.4213	2.60525	46.6575	149.867	0.0332943	13694.9	19.4988	0.720868	0.68842	-4.50129	15.1832	75.4868	1.76636	17.0775	109.514	0.0243295
Zhuhai City	Guangdong	16457.8	1506.71	0.491885	0.432676	-12.0372	76.6933	350.733	2.64002	235.189	665.255	0.0552666	16457.8	1506.71	0.491885	0.408062	-17.0412	76.6933	350.733	9.56852	235.189	672.183	0.0394446	16457.8	1506.71	0.491885	0.408062	-17.0412	76.6933	309.943	6.48746	86.0832	479.207	0.0281205
Zhaoqing City	Guangdong	22061	3684.58	0.280648	0.276271	-1.55975	63.976	247.542	1.03034	132.071	444.62	0.28506	22061	3684.58	0.280648	0.274571	-2.16552	63.976	247.542	3.73438	132.071	447.324	0.206566	22061	3684.58	0.280648	0.274571	-2.16552	63.976	218.753	2.53191	48.3404	333.602	0.154052
Maoming City	Guangdong	7470.3	0	0.971451	0.964829	-0.68164	44.7762	122.168	0.853656	81.0265	248.824	0.365036	7470.3	0	0.971451	0.963645	-0.803561	44.7762	122.168	3.09401	81.0265	251.065	0.312441	7470.3	0	0.971451	0.963645	-0.803561	44.7762	107.96	2.09774	29.6571	184.491	0.229592
Yangjiang City	Guangdong	16448.3	0	0.361138	0.354875	-1.73427	19.2929	125.296	1.05625	79.0678	224.713	0.129573	16448.3	0	0.361138	0.353496	-2.11631	19.2929	125.296	3.8283	79.0678	227.485	0.107491	16448.3	0	0.361138	0.353496	-2.11631	19.2929	110.724	2.59559	28.9402	161.553	0.0763371
Shaoguan City	Guangdong	8937.92	50.4688	0.219821	0.218559	-0.574103	35.4192	163.566	0.833672	31.8739	231.693	0.403561	8937.92	50.4688	0.219821	0.217679	-0.974292	35.4192	163.566	3.02157	31.8739	233.881	0.240047	8937.92	50.4688	0.219821	0.217679	-0.974292	35.4192	144.543	2.04863	11.6664	193.678	0.198784
Beihai City	Guangxi	2870.68	46.9602	0.489958	0.48594	-0.820192	39.339	86.1302	0.539953	198.316	324.325	0.395431	2870.68	46.9602	0.489958	0.479501	-2.13434	39.339	86.1302	18.3551	198.316	342.14	0.160302	2870.68	46.9602	0.489958	0.479501	-2.13434	39.339	75.6579	12.4448	30.0539	157.495	0.073791
Nanning	Guangxi	10480.1	11.8642	0.310416	0.30721	-1.03287	58.0579	60.8192	0.479535	77.4399	196.797	0.190534	10480.1	11.8642	0.310416	0.305587	-1.55575	58.0579	60.8192	16.3012	77.4399	212.618	0.136666	10480.1	11.8642	0.310416	0.305587	-1.55575	58.0579	53.4244	11.0522	11.7357	134.27	0.086306
Nanning City	Guangxi	34293.3	0	6.01617	5.87992	-2.26483	21.9772	21.1105	0.479535	55.3867	98.954	0.0436914	34293.3	0	6.01617	5.87953	-2.27121	21.9772	21.1105	16.3012	55.3867	114.776	0.050535	34293.3	0	6.01617	5.87953	-2.27121	21.9772	18.5437	11.0522	8.39362	59.9667	0.026403
Liuzhou	Guangxi	5478.27	152.85	0.306505	0.305242	-0.412033	59.03	69.6401	0.575342	76.4764	205.722	0.499272	5478.27	152.85	0.306505	0.303849	-0.866316	59.03	69.6401	19.5581	76.4764	224.705	0.259377	5478.27	152.85	0.306505	0.303849	-0.866316	59.03	61.1728	13.2604	11.5897	145.053	0.167435
Liuzhou City	Guangxi	27498.7	0	0.122076	0.120864	-0.992577	50.6011	243.061	0.575342	548.732	842.969	0.849236	27498.7	0	0.122076	0.118589	-2.85666	50.6011	243.061	19.5581	548.732	861.952	0.301735	27498.7	0	0.122076	0.118589	-2.85666	50.6011	213.508	13.2604	83.1579	360.527	0.126206
Guilin City	Guangxi	21874.4	0	0.230394	0.229385	-0.438118	90.6245	132.458	0.384373	104.361	327.828	0.748228	21874.4	0	0.230394	0.228671	-0.748022	90.6245	132.458	13.0663	104.361	340.51	0.4552	21874.4	0	0.230394	0.228671	-0.748022	90.6245	116.353	8.85896	15.8155	231.652	0.309676
Wuzhou City	Guangxi	8738.92	11.377	0.460761	0.457815	-0.639204	25.5642	40.9409	0.352854	58.0404	124.898	0.195396	8738.92	11.377	0.460761	0.456999	-0.816433	25.5642	40.9409	11.9949	58.0404	136.54	0.167239	8738.92	11.377	0.460761	0.456999	-0.816433	25.5642	35.963	8.13252	8.79577	78.4555	0.0960948
Hechi City	Guangxi	6505.74	174.396	0.112267	0.112037	-0.205046	43.9827	53.7523	0.174365	134.136	232.045	1.13138	6505.74	174.396	0.112267	0.111598	-0.596166	43.9827	53.7523	5.92733	134.136	237.798	0.398839	6505.74	174.396	0.112267	0.111598	-0.596166	43.9827	47.2167	4.01873	20.3277	115.546	0.193795
Yulin City	Guangxi	6778.87	54.3065	0.494574	0.491801	-0.560704	33.5114	125.563	0.248671	302.9	462.224	0.824388	6778.87	54.3065	0.494574	0.489032	-1.1207	33.5114	125.563	8.45328	302.9	470.428	0.419767	6778.87	54.3065	0.494574	0.489032	-1.1207	33.5114	110.296	5.73133	45.9032	195.442	0.174395
Baise City	Guangxi	11822.7	262.205	0.25155	0.249979	-0.624211	62.162	90.176	0.267426	63.7014	216.307	0.34652	11822.7	262.205	0.25155	0.248702	-1.13194	62.162	90.176	9.09083	63.7014	225.13	0.198891	11822.7	262.205	0.25155	0.248702	-1.13194	62.162	79.2118	6.16359	9.65367	157.191	0.13887
Guigang City	Guangxi	7965.56	2.77399	0.715948	0.710102	-0.816567	45.1302	73.4258	0.197811	73.7487	192.502	0.235748	7965.56	2.77399	0.715948	0.708054	-1.10262	45.1302	73.4258	6.72435	73.7487	199.029	0.180506	7965.56	2.77399	0.715948	0.708054	-1.10262	45.1302	64.4981	4.55911	11.1763	125.364	0.113697
Hezhou City	Guangxi	4314.37	0	0.266944	0.266173	-0.288488	21.9836	35.7425	0.226525	23.214	81.1667	0.281366	4314.37	0	0.266944	0.265533	-0.528464	21.9836	35.7425	7.70045	23.214	88.6406	0.167733	4314.37	0	0.266944	0.265533	-0.528464	21.9836	31.3967	5.2209	3.51798	62.1192	0.117547
Qinzhou City	Guangxi	11484.5	43.6639	0.484295	0.478164	-1.26613	58.9682	62.0266	0.288897	132.227	253.511	0.200224	11484.5	43.6639	0.484295	0.4763	-1.65085	58.9682	62.0266	9.82074	132.227	263.042	0.159336	11484.5	43.6639	0.484295	0.4763	-1.65085	58.9682	54.4849	6.65846	20.0384	140.15	0.0848948
Fangchenggang City	Guangxi	2931.36	0	0.162166	0.161546	-0.382201	21.9893	36.3184	0.664308	31.702	90.674	0.237276	2931.36	0	0.162166	0.160322	-1.13704	21.9893	36.3184	22.5824	31.702	112.592	0.0990265	2931.36	0	0.162166	0.160322	-1.13704	21.9893	31.9025	15.3109	4.80429	74.007	0.0650903
Liupanshui City	Guizhou	11770.5	4663.27	0.265483	0.262316	-1.19303	60.2826	74.8832	4.05424	117.379	256.599	0.215079	11770.5	4663.27	0.265483	0.260858	-1.74226	60.2826	74.8832	26.2833	117.379	278.828	0.16004	11770.5	4663.27	0.265483	0.260858	-1.74226	60.2826	64.2269	17.8201	32.761	175.091	0.100498
Anshun City	Guizhou	8291.34	1594.77	0.372582	0.367954	-1.24217	29.0129	46.4726	2.63655	76.7626	154.885	0.12469	8291.34	1594.77	0.372582	0.366573	-1.61269	29.0129	46.4726	17.0925	76.7626	169.341	0.105005	8291.34	1594.77	0.372582	0.366573	-1.61269	29.0129	39.8593	11.5887	21.4249	101.886	0.0631772
Bijie City	Guizhou	6414.78	0	0.262018	0.260381	-0.6245	76.0839	111.1	2.16555	441.245	630.594	1.00978	6414.78	0	0.262018	0.258571	-1.31545	76.0839	111.1	14.039	441.245	642.467	0.488407	6414.78	0	0.262018	0.258571	-1.31545	76.0839	95.2895	9.51848	123.154	304.046	0.231137
Guiyang City	Guizhou	35197.7	0	0.328928	0.303399	-7.76136	163.676	430.512	6.13747	950.249	1550.58	0.199781	35197.7	0	0.328928	0.28597	-13.06	163.676	430.512	39.7887	950.249	1584.23	0.121304	35197.7	0	0.328928	0.28597	-13.06	163.676	369.248	26.9767	265.22	825.12	0.0631792
Zunyi City	Guizhou	23814.9	0	0.38204	0.375456	-1.7233	87.0108	213.306	3.42153	380.189	683.927	0.396867	23814.9	0	0.38204	0.372486	-2.50084	87.0108	213.306	22.1815	380.189	702.687	0.280979	23814.9	0	0.38204	0.372486	-2.50084	87.0108	182.951	15.039	106.113	391.114	0.156392
Tongren City	Guizhou	5579.61	0	0.371196	0.369272	-0.518432	48.7657	29.6248	2.40733	117.735	198.533	0.38295	5579.61	0	0.371196	0.368725	-0.665847	48.7657	29.6248	15.6065	117.735	211.732	0.317978	5579.61	0	0.371196	0.368725	-0.665847	48.7657	25.4091	10.5812	32.8605	117.617	0.176636
Southeast Guizhou Miao & Dong A.P	Guizhou	13173.2	0	0.116906	0.116201	-0.603219	104.631	96.4536	2.27085	202.91	406.265	0.673477	13173.2	0	0.116906	0.115454	-1.24236	104.631	96.4536	14.7217	202.91	418.716	0.33702	13173.2	0	0.116906	0.115454	-1.24236	104.631	82.7278	9.98134	56.6332	253.974	0.20442
South Guizhou Buyi & Miao A.P	Guizhou	7128.19	0	0.138191	0.137592	-0.433964	28.7265	85.689	2.71672	191.586	308.719	0.71136	7128.19	0	0.138191	0.136771	-1.028	28.7265	85.689	17.6123	191.586	323.614	0.314794	7128.19	0	0.138191	0.136771	-1.028	28.7265	73.495	11.9411	53.4728	167.635	0.163067
Southwest Guizhou Buyi & Miao A.P	Guizhou	7719.64	0	0.210825	0.209115	-0.811195	36.4195	54.2628	2.77284	133.029	226.484	0.279195	7719.64	0	0.210825	0.208054	-1.31422	36.4195	54.2628	17.9761	133.029	241.687	0.183899	7719.64	0	0.210825	0.208054	-1.31422	36.4195	46.5409	12.1878	37.129	132.277	0.10065
Wanning City	Hainan	853.131	367.464				9.67842	15.9326	2.50101	4.03596	32.148		853.131	367.464				9.67842	15.9326	10.8949	4.03596	40.5419		853.131	367.464				9.67842	12.1208	7.38677	1.03874	30.2247
Sanya City	Hainan	0	1217.47	0.132022	0.125943	-4.60498	48.7566	83.3029	4.96028	52.7152	189.735	0.0412023	0	1217.47	0.132022	0.105538	-20.0602	48.7566	83.3029	21.608	52.7152	206.383	0.0102882	0	1217.47	0.132022	0.105538	-20.0602	48.7566	63.3728	14.6502	13.5674	140.347	0.0069963
Sansha City	Hainan	0					12.3335	1.20277	0	0	13.5363		0					12.3335	1.20277	0	0	13.5363		0					12.3335	0.915008	0	0	13.2485
Dongfang City	Hainan	0					10.5777	0	2.9308	0.159293	13.6677		0					10.5777	0	12.7672	0.159293	23.5041		0					10.5777	0	8.65615	0.0409976	19.2748
Lingao County	Hainan	1750.3					0.818916	5.95036	2.77868	0	9.54796		1750.3					0.818916	5.95036	12.1045	0	18.8738		1750.3					0.818916	4.52675	8.20688	0	13.5525
Ledong Li Autonomous County	Hainan	1302.99	0				3.05456	5.01009	1.87949	0.0798748	10.024		1302.99	0				3.05456	5.01009	8.18746	0.0798748	16.332		1302.99	0				3.05456	3.81143	5.5511	0.0205575	12.4376
Wuzhishan City	Hainan	545.554	0				6.81917	5.51926	1.79406	0	14.1325		545.554	0				6.81917	5.51926	7.81531	0	20.1537		545.554	0				6.81917	4.19879	5.29878	0	16.3167
Baoting Li & Miao Autonomous County	Hainan	540.934	0				3.32343	2.84508	2.18253	0.234877	8.58591		540.934	0				3.32343	2.84508	9.50757	0.234877	15.9109		540.934	0				3.32343	2.1644	6.44613	0.0604509	11.9944
Danzhou City	Hainan	3212.22					6.76152	16.4465	3.86223	2.43093	29.5012		3212.22					6.76152	16.4465	16.8247	2.43093	42.4637		3212.22					6.76152	12.5117	11.4071	0.625653	31.306
Dingan County	Hainan	0					8.87159	0	2.19212	0.483813	11.5475		0					8.87159	0	9.54933	0.483813	18.9047		0					8.87159	0	6.47445	0.12452	15.4705
Tunchang County	Hainan	748.244	0				2.7188	3.16172	1.87686	0.821569	8.57895		748.244	0				2.7188	3.16172	8.176	0.821569	14.8781		748.244	0				2.7188	2.40529	5.54333	0.211449	10.8789
Wenchang City	Hainan	2401.89	0				5.17539	14.8771	2.60324	2.01399	24.6697		2401.89	0				5.17539	14.8771	11.3403	2.01399	33.4067		2401.89	0				5.17539	11.3178	7.6887	0.518343	24.7002
Chartgjiang Li Autonomous County	Hainan	1547.98	0				7.07618	11.3392	3.34921	0.67072	22.4353		1547.98	0				7.07618	11.3392	14.5899	0.67072	33.676		1547.98	0				7.07618	8.62629	9.89195	0.172624	25.7671
Haikou City	Hainan	481.95	26.2604				76.7512	133.489	4.45685	112.125	326.822		481.95	26.2604				76.7512	133.489	19.415	112.125	341.78		481.95	26.2604				76.7512	101.552	13.1634	28.8578	220.325
Chengmai County	Hainan	0	78.5779				13.6213	11.4195	4.23373	3.15163	32.4262		0	78.5779				13.6213	11.4195	18.443	3.15163	46.6355		0	78.5779				13.6213	8.68743	12.5044	0.811141	35.6243
Qiongzhong Li & Miao Autonomous County	Hainan	576.808					2.38236	3.35305	1.87762	0.343119	7.95616		576.808					2.38236	3.35305	8.17933	0.343119	14.2579		576.808					2.38236	2.55084	5.54559	0.0883092	10.5671
Qionghai City	Hainan	2844.46					0.273175	15.2186	3.39715	2.00372	20.8927		2844.46					0.273175	15.2186	14.7987	2.00372	32.2942		2844.46					0.273175	11.5776	10.0335	0.5157	22.4
Baisha Li Autonomous County	Hainan	0					0.381478	2.47232	1.98732	0	4.84112		0					0.381478	2.47232	8.65719	0	11.511		0					0.381478	1.88082	5.86957	0	8.13188
Lingshui Li Autonomous County	Hainan	0	0				4.26246	5.93048	3.04244	0.0858084	13.3212		0	0				4.26246	5.93048	13.2535	0.0858084	23.5323		0	0				4.26246	4.51162	8.9859	0.0220847	17.7821
Baoding City	Hebei	17378.4	2818.67	0.133628	0.0745987	-44.1744	349.876	465.914	3.23045	1076.07	1895.09	0.0429003	17378.4	2818.67	0.133628	0.0631804	-52.7192	349.876	465.914	3.97853	1076.07	1895.84	0.0359611	17378.4	2818.67	0.133628	0.0631804	-52.7192	349.876	447.31	2.69744	454.246	1254.13	0.0237888
Tangshan City	Hebei	35812.8	14875.4	0.952588	0.728149	-23.561	331.004	409.385	7.06623	1229.79	1977.24	0.08392	35812.8	14875.4	0.952588	0.716051	-24.831	331.004	409.385	8.70256	1229.79	1978.88	0.0796939	35812.8	14875.4	0.952588	0.716051	-24.831	331.004	393.038	5.90034	519.134	1249.08	0.0503031
Langfang City	Hebei	18226.4	2124.43	0.566958	0.378485	-33.2429	155.409	186.37	7.77539	414.793	764.346	0.0229928	18226.4	2124.43	0.566958	0.364817	-35.6536	155.409	186.37	9.57595	414.793	766.147	0.0214886	18226.4	2124.43	0.566958	0.364817	-35.6536	155.409	178.928	6.49249	175.098	515.927	0.0144705
Zhangjiakou City	Hebei	14256	871.585	0.194372	0.152773	-21.4017	156.197	170.546	2.77969	350.218	679.74	0.031761	14256	871.585	0.194372	0.146909	-24.4187	156.197	170.546	3.42339	350.218	680.384	0.0278632	14256	871.585	0.194372	0.146909	-24.4187	156.197	163.736	2.32106	147.839	470.092	0.0192513
Chengde City	Hebei	6625.93	2351.89	0.15138	0.123822	-18.2048	134.041	135.422	3.47056	191.651	464.585	0.0255199	6625.93	2351.89	0.15138	0.118886	-21.4653	134.041	135.422	4.27424	191.651	465.389	0.021681	6625.93	2351.89	0.15138	0.118886	-21.4653	134.041	130.015	2.89794	80.9022	347.856	0.0162056
Cangzhou City	Hebei	26018.7	3904.89	0.106525	0.0620587	-41.7426	201.088	211.399	8.57956	307.073	728.14	0.0174435	26018.7	3904.89	0.106525	0.0552781	-48.1079	201.088	211.399	10.5663	307.073	730.127	0.0151769	26018.7	3904.89	0.106525	0.0552781	-48.1079	201.088	202.958	7.16397	129.626	540.835	0.0112421
Shyiazhuang City	Hebei	56088.6	22457.3	1.64179	1.06851	-34.9181	371.771	554.66	4.61913	1455.73	2386.78	0.0683538	56088.6	22457.3	1.64179	1.05096	-35.9866	371.771	554.66	5.68878	1455.73	2387.85	0.0663539	56088.6	22457.3	1.64179	1.05096	-35.9866	371.771	532.512	3.85699	614.514	1522.65	0.0423116
Qinhuangdao City	Hebei	8166.45	3374.38	0.70905	0.603456	-14.8923	109.113	210.637	4.78245	416.431	740.963	0.0497549	8166.45	3374.38	0.70905	0.591742	-16.5444	109.113	210.637	5.88992	416.431	742.071	0.0448534	8166.45	3374.38	0.70905	0.591742	-16.5444	109.113	202.226	3.99337	175.789	491.122	0.0296851
Hengshui City	Hebei	6022.56	2507.27	0.205567	0.125	-39.1928	137.798	152.832	4.35711	235.724	530.711	0.0135411	6022.56	2507.27	0.205567	0.11087	-46.0662	137.798	152.832	5.36609	235.724	531.72	0.0115425	6022.56	2507.27	0.205567	0.11087	-46.0662	137.798	146.73	3.63821	99.5069	387.673	0.0084156
Xingtai City	Hebei	7610.16	3172.01	0.557577	0.428098	-23.2216	156.783	209.671	2.18626	316.705	685.345	0.0295132	7610.16	3172.01	0.557577	0.411446	-26.2082	156.783	209.671	2.69253	316.705	685.851	0.0261693	7610.16	3172.01	0.557577	0.411446	-26.2082	156.783	201.299	1.82554	133.691	493.598	0.0188337
Handan City	Hebei	8832.08	20470	0.525186	0.370539	-29.4462	176.207	288.966	3.01494	479.152	947.339	0.0321719	8832.08	20470	0.525186	0.348635	-33.6169	176.207	288.966	3.71311	479.152	948.038	0.0282012	8832.08	20470	0.525186	0.348635	-33.6169	176.207	277.427	2.51749	202.266	658.417	0.0195859
Sanmenxia City	Henan	10994.2	94.1799	0.446537	0.407652	-8.70798	25.1144	260.483	34.3417	208.739	528.679	0.0607121	10994.2	94.1799	0.446537	0.399625	-10.5056	25.1144	260.483	65.4344	208.739	559.771	0.0532831	10994.2	94.1799	0.446537	0.399625	-10.5056	25.1144	233.015	44.3645	68.5558	371.05	0.0353192
Xinyang City	Henan	28018.2	0	0.566729	0.544956	-3.84193	40.1851	334.582	18.5996	270.512	663.879	0.172798	28018.2	0	0.566729	0.542886	-4.20709	40.1851	334.582	35.4395	270.512	680.719	0.161802	28018.2	0	0.566729	0.542886	-4.20709	40.1851	299.3	24.028	88.8436	452.357	0.107522
Nanyang City	Henan	32887	0	1.66893	1.53044	-8.29818	61.9197	511.583	17.672	295.586	886.76	0.106861	32887	0	1.66893	1.52426	-8.66878	61.9197	511.583	33.672	295.586	902.76	0.104139	32887	0	1.66893	1.52426	-8.66878	61.9197	457.635	22.8296	97.0784	639.463	0.0737661
Zhoukou City	Henan	32795.9	0	2.40149	2.03355	-15.3212	42.2972	426.984	14.6344	364.455	848.37	0.0553724	32795.9	0	2.40149	2.02379	-15.7275	42.2972	426.984	27.8843	364.455	861.62	0.0547842	32795.9	0	2.40149	2.02379	-15.7275	42.2972	381.958	18.9056	119.697	562.857	0.035788
Shangqiu City	Henan	25243.1	1632.81	2.0002	1.7176	-14.1284	61.9565	465.243	15.382	362.047	904.629	0.0640289	25243.1	1632.81	2.0002	1.70512	-14.7525	61.9565	465.243	29.3086	362.047	918.555	0.0622643	25243.1	1632.81	2.0002	1.70512	-14.7525	61.9565	416.182	19.8712	118.906	616.916	0.0418177
Anyang City	Henan	7143.33	3486.19	4.77035	4.39671	-7.83263	46.6192	308.353	22.714	407.132	784.819	0.100199	7143.33	3486.19	4.77035	4.38048	-8.17271	46.6192	308.353	43.279	407.132	805.384	0.0985456	7143.33	3486.19	4.77035	4.38048	-8.17271	46.6192	275.837	29.3432	133.713	485.513	0.0594066
Pingdingshan City	Henan	16668.6	793.703	2.53318	2.14466	-15.3372	36.8822	455.623	20.9599	304.157	817.622	0.0533097	16668.6	793.703	2.53318	2.12473	-16.124	36.8822	455.623	39.9368	304.157	836.599	0.0518853	16668.6	793.703	2.53318	2.12473	-16.124	36.8822	407.577	27.0772	99.8935	571.43	0.0354397
Kaifeng City	Henan	25745	661.572	3.4227	2.663	-22.196	42.7808	415.667	21.7876	340.868	821.103	0.0369933	25745	661.572	3.4227	2.6454	-22.7102	42.7808	415.667	41.5139	340.868	840.83	0.0370244	25745	661.572	3.4227	2.6454	-22.7102	42.7808	371.834	28.1464	111.95	554.712	0.0244257
Xinxiang City	Henan	26958.1	2289.94	3.15099	2.52924	-19.7319	71.9767	583.782	21.1795	545.206	1222.14	0.0619373	26958.1	2289.94	3.15099	2.5085	-20.3902	71.9767	583.782	40.3552	545.206	1241.32	0.0608783	26958.1	2289.94	3.15099	2.5085	-20.3902	71.9767	522.221	27.3608	179.06	800.619	0.0392649
Luoyang City	Henan	55765.7	8113.05	2.00294	1.49003	-25.6077	79.8319	782.852	31.8815	756.863	1651.43	0.0644896	55765.7	8113.05	2.00294	1.47259	-26.4782	79.8319	782.852	60.7467	756.863	1680.29	0.0634594	55765.7	8113.05	2.00294	1.47259	-26.4782	79.8319	700.299	41.1862	248.575	1069.89	0.0404064
Luohe City	Henan	17809.8	1122.58	1.46679	1.01824	-30.5809	41.6769	390.146	23.4288	320.017	775.269	0.0253514	17809.8	1122.58	1.46679	0.987064	-32.706	41.6769	390.146	44.641	320.017	796.481	0.0243527	17809.8	1122.58	1.46679	0.987064	-32.706	41.6769	349.005	30.2666	105.102	526.051	0.0160842
Puyang City	Henan	19682.4	903.479	7.69038	5.22988	-31.9945	60.4758	351.141	22.7226	304.448	738.788	0.0230911	19682.4	903.479	7.69038	5.20148	-32.3638	60.4758	351.141	43.2955	304.448	759.36	0.0234632	19682.4	903.479	7.69038	5.20148	-32.3638	60.4758	314.113	29.3543	99.989	503.932	0.0155708
Jiaozuo City	Henan	23884.7	4747.36	2.26259	1.6513	-27.0172	161.651	1165.08	33.6688	965.294	2325.69	0.0860817	23884.7	4747.36	2.26259	1.592	-29.6382	161.651	1165.08	64.1523	965.294	2356.17	0.0794978	23884.7	4747.36	2.26259	1.592	-29.6382	161.651	1042.22	43.4952	317.029	1564.39	0.0527829
Xuchang City	Henan	25738.3	1071.31	2.7006	2.0081	-25.6425	61.329	430.997	30.9378	336.342	859.606	0.0335227	25738.3	1071.31	2.7006	1.98718	-26.4171	61.329	430.997	58.9487	336.342	887.617	0.0336001	25738.3	1071.31	2.7006	1.98718	-26.4171	61.329	385.548	39.9672	110.464	597.308	0.0226107
Zhengzhou City	Henan	31119.3	16319.2	4.55483	3.36036	-26.2243	142.747	850.447	47.6008	728.673	1769.47	0.0674744	31119.3	16319.2	4.55483	3.32541	-26.9916	142.747	850.447	90.6981	728.673	1812.57	0.0671529	31119.3	16319.2	4.55483	3.32541	-26.9916	142.747	760.766	61.4933	239.316	1204.32	0.0446184
Zhumadian City	Henan	25921.5	3653.2	1.10418	0.99176	-10.1811	50.5341	379.417	16.6531	304.709	751.313	0.073795	25921.5	3653.2	1.10418	0.984766	-10.8145	50.5341	379.417	31.7306	304.709	766.391	0.0708668	25921.5	3653.2	1.10418	0.984766	-10.8145	50.5341	339.407	21.5134	100.075	511.529	0.0473002
Hebi City	Henan	10165.8	149.588	4.87903	3.34309	-31.4804	41.4239	188.558	27.6172	157.1	414.699	0.0131732	10165.8	149.588	4.87903	3.31427	-32.0711	41.4239	188.558	52.6216	157.1	439.704	0.0137103	10165.8	149.588	4.87903	3.31427	-32.0711	41.4239	168.674	35.6774	51.5959	297.372	0.0092723
Qitaihe City	Heilongjiang	0	0	0.134529	0.134339	-0.140788	21.1	60.0947	6.03456	47.455	134.684	0.956829	0	0	0.134529	0.129	-4.10938	21.1	60.0947	176.165	47.455	304.814	0.0741762	0	0	0.134529	0.129	-4.10938	21.1	46.1634	119.44	12.353	199.056	0.04844
Yichun City	Heilongjiang	0		0.0105162	0.0104903	-0.246287	40.9968	79.288	4.96247	63.7954	189.043	0.769144	0		0.0105162	0.0097616	-7.1756	40.9968	79.288	144.868	63.7954	328.948	0.0458463	0		0.0105162	0.0097616	-7.1756	40.9968	60.9072	98.2203	16.6066	216.731	0.0302063
Jiamusi City	Heilongjiang	13227.2	0	0.0280634	0.0272666	-2.83929	60.9686	169.664	8.5254	95.4565	334.615	0.117852	13227.2	0	0.0280634	0.0248421	-11.4787	60.9686	169.664	248.879	95.4565	574.968	0.0500901	13227.2	0	0.0280634	0.0248421	-11.4787	60.9686	130.332	168.74	24.8483	384.889	0.0335308
Shuangyashan City	Heilongjiang	5241.89	0	0.0192825	0.0190085	-1.42098	30.2108	64.597	7.10592	119.931	221.845	0.156101	5241.89	0	0.0192825	0.0178906	-7.21846	30.2108	64.597	207.44	119.931	422.179	0.0584867	5241.89	0	0.0192825	0.0178906	-7.21846	30.2108	49.6219	140.645	31.2192	251.697	0.0348688
Harbin City	Heilongjiang	35630.9	0	0.0674644	0.0651879	-3.37437	301.261	814.345	14.3497	1079.21	2209.17	0.6547	35630.9	0	0.0674644	0.0599063	-11.2031	301.261	814.345	418.905	1079.21	2613.72	0.233305	35630.9	0	0.0674644	0.0599063	-11.2031	301.261	625.561	284.017	280.929	1491.77	0.133158
Daxing'anling Prefecture	Heilongjiang	1472.54	0				19.9456	47.0496	6.76217	43.5591	117.317		1472.54	0				19.9456	47.0496	197.405	43.5591	307.96		1472.54	0				19.9456	36.1424	133.841	11.3389	201.268
Daqing City	Heilongjiang	17866.8	693.828	0.35412	0.323755	-8.57475	158.465	287.016	26.7693	214.752	687.002	0.0801192	17866.8	693.828	0.35412	0.313597	-11.4432	158.465	287.016	781.468	214.752	1441.7	0.125988	17866.8	693.828	0.35412	0.313597	-11.4432	158.465	220.479	529.835	55.9021	964.681	0.0843021
Mudanjiang City	Heilongjiang	4901.95	0	0.0669492	0.0665078	-0.659306	79.281	240.81	10.8908	323.768	654.75	0.993069	4901.95	0	0.0669492	0.0644839	-3.68234	79.281	240.81	317.931	323.768	961.79	0.261183	4901.95	0	0.0669492	0.0644839	-3.68234	79.281	184.985	215.557	84.2801	564.103	0.153187
Suihua City	Heilongjiang	16689.2	0	0.0210809	0.0203258	-3.58192	90.9568	210.377	5.61448	340.809	647.757	0.180845	16689.2	0	0.0210809	0.0174168	-17.3811	90.9568	210.377	163.901	340.809	806.044	0.0463745	16689.2	0	0.0210809	0.0174168	-17.3811	90.9568	161.607	111.125	88.7159	452.405	0.0260284
Jixi City	Heilongjiang	1281.27		0.0329722	0.0327964	-0.533176	52.4542	110.977	6.86087	157.277	327.569	0.614191	1281.27		0.0329722	0.0307629	-6.70049	52.4542	110.977	200.287	157.277	520.995	0.0777551	1281.27		0.0329722	0.0307629	-6.70049	52.4542	85.2501	135.794	40.9408	314.44	0.046928
Hegang City	Heilongjiang	5166.64	0	0.0222913	0.0218822	-1.83525	40.3495	89.0023	6.07297	73.1672	208.592	0.113678	5166.64	0	0.0222913	0.0199239	-10.6203	40.3495	89.0023	177.286	73.1672	379.805	0.0357631	5166.64	0	0.0222913	0.0199239	-10.6203	40.3495	68.3696	120.2	19.0462	247.965	0.0233489
Heihe City	Heilongjiang	4024.05		0.0029426	0.0028963	-1.57344	68.0589	96.1724	6.46048	141.043	311.735	0.197988	4024.05		0.0029426	0.0020048	-31.8698	68.0589	96.1724	188.598	141.043	493.872	0.0154957	4024.05		0.0029426	0.0020048	-31.8698	68.0589	73.8774	127.87	36.7148	306.521	0.0096174
Qiqihar City	Heilongjiang	14466.8	0	0.0556985	0.0538642	-3.29327	93.0252	216.181	5.93902	275.495	590.64	0.179343	14466.8	0	0.0556985	0.0504351	-9.44981	93.0252	216.181	173.376	275.495	758.077	0.0802206	14466.8	0	0.0556985	0.0504351	-9.44981	93.0252	166.065	117.549	71.7142	448.353	0.0474453
Shiyan City	Hubei	26151.9	11.4286	0.28158	0.270356	-3.98621	80.4054	208.582	1.02267	262.223	552.232	0.138536	26151.9	11.4286	0.28158	0.262792	-6.67266	80.4054	208.582	24.9072	262.223	576.117	0.08634	26151.9	11.4286	0.28158	0.262792	-6.67266	80.4054	197.047	16.887	65.5667	359.906	0.0539376
Xianning City	Hubei	12197.7	0	0.375635	0.371289	-1.15705	45.2489	79.1266	1.09726	72.7273	198.2	0.171297	12197.7	0	0.375635	0.369483	-1.63789	45.2489	79.1266	26.7238	72.7273	223.827	0.136655	12197.7	0	0.375635	0.369483	-1.63789	45.2489	74.7511	18.1187	18.1849	156.304	0.0954295
Xiaogan City	Hubei	20045.9	1679.79	1.43414	1.37252	-4.29659	97.9385	152.398	0.796296	177.207	428.34	0.0996924	20045.9	1679.79	1.43414	1.36456	-4.85156	97.9385	152.398	19.3938	177.207	446.937	0.0921226	20045.9	1679.79	1.43414	1.36456	-4.85156	97.9385	143.971	13.149	44.3092	299.367	0.0617055
Yichang City	Hubei	11978.9	0	0.325032	0.321077	-1.21677	96.7226	220.473	2.19165	235.139	554.526	0.45574	11978.9	0	0.325032	0.315898	-2.81015	96.7226	220.473	53.3776	235.139	605.712	0.215546	11978.9	0	0.325032	0.315898	-2.81015	96.7226	208.281	36.19	58.7946	399.988	0.142338
Enshi Tujia & Miao A.P	Hubei	6986.48	1.82375	0.0503774	0.0501181	-0.514715	66.7392	78.6739	0	93.7893	239.202	0.46463	6986.48	1.82375	0.0503774	0.0489675	-2.79868	66.7392	78.6739	0	93.7893	239.202	0.0854699	6986.48	1.82375	0.0503774	0.0489675	-2.79868	66.7392	74.3234	0	23.4513	164.514	0.0587828
Wuhan City	Hubei	84300.4	677.444	1.18013	1.03787	-12.0546	393.784	715.679	2.77102	1372.04	2484.28	0.206086	84300.4	677.444	1.18013	1.01299	-14.1632	393.784	715.679	67.488	1372.04	2548.99	0.179973	84300.4	677.444	1.18013	1.01299	-14.1632	393.784	676.103	45.7569	343.068	1458.71	0.102993
Administrative units directly under the Jurisdiction	Hubei	4030.39	0	0.738912	0.733987	-0.666521	62.6736	118.954	0	77.8777	259.505	0.389347	4030.39	0	0.738912	0.729361	-1.29254	62.6736	118.954	0	77.8777	259.505	0.200773	4030.39	0	0.738912	0.729361	-1.29254	62.6736	112.376	0	19.4727	194.523	0.150497
Jingzhou City	Hubei	17876	0.742687	0.733181	0.720749	-1.69568	58.2346	174.997	0.741771	169.419	403.392	0.237894	17876	0.742687	0.733181	0.716738	-2.24272	58.2346	174.997	18.0658	169.419	420.716	0.187593	17876	0.742687	0.733181	0.716738	-2.24272	58.2346	165.32	12.2486	42.3619	278.165	0.124031
Jingmen City	Hubei	13457	0	1.36821	1.32549	-3.12291	35.4263	111.836	1.27731	119.545	268.085	0.0858447	13457	0	1.36821	1.31917	-3.58468	35.4263	111.836	31.1088	119.545	297.917	0.083108	13457	0	1.36821	1.31917	-3.58468	35.4263	105.652	21.0918	29.8914	192.061	0.0535782
Xiangyang City	Hubei	18285.9	58.2603	1.8586	1.78393	-4.01781	56.7284	147.428	1.60512	336.891	542.652	0.13506	18285.9	58.2603	1.8586	1.77602	-4.44291	56.7284	147.428	39.0928	336.891	580.14	0.130576	18285.9	58.2603	1.8586	1.77602	-4.44291	56.7284	139.275	26.5049	84.2369	306.745	0.0690413
Ezhou City	Hubei	734.063		1.84629	1.83536	-0.591674	20.2831	55.905	1.83403	76.1614	154.184	0.260589	734.063		1.84629	1.82478	-1.16482	20.2831	55.905	44.6677	76.1614	197.017	0.16914	734.063		1.84629	1.82478	-1.16482	20.2831	52.8135	30.2847	19.0436	122.425	0.105103
Suizhou City	Hubei	9545.78		1.05592	1.01814	-3.57756	15.9618	51.2851	0.955321	46.8438	115.046	0.0321574	9545.78		1.05592	1.01346	-4.02115	15.9618	51.2851	23.2668	46.8438	137.357	0.0341584	9545.78		1.05592	1.01346	-4.02115	15.9618	48.4492	15.7749	11.7129	91.8987	0.0228536
Huanggang City	Hubei	11060.1	88.9836	0.568266	0.563609	-0.819529	52.7357	127.441	0.672237	110.946	291.795	0.356049	11060.1	88.9836	0.568266	0.561343	-1.21818	52.7357	127.441	16.3723	110.946	307.495	0.25242	11060.1	88.9836	0.568266	0.561343	-1.21818	52.7357	120.394	11.1004	27.7412	211.971	0.174005
Huangshi City	Hubei	19390.4	25.3359	1.12225	1.0683	-4.80695	46.6442	118.778	1.33194	125.549	292.303	0.0608081	19390.4	25.3359	1.12225	1.06113	-5.44612	46.6442	118.778	32.4394	125.549	323.41	0.0593835	19390.4	25.3359	1.12225	1.06113	-5.44612	46.6442	112.21	21.9939	31.3925	212.24	0.0389708
Loudi City	Hunan	21006.1	91.5631	0.479521	0.467029	-2.60516	71.1754	146.41	2.13488	270.665	490.385	0.188236	21006.1	91.5631	0.479521	0.464345	-3.1648	71.1754	146.41	344.728	270.665	832.978	0.263201	21006.1	91.5631	0.479521	0.464345	-3.1648	71.1754	122.545	233.725	78.8184	506.264	0.159967
Yueyang City	Hunan	24442.3	0	0.869269	0.853579	-1.80489	84.0061	206.103	3.28294	393.334	686.725	0.380481	24442.3	0	0.869269	0.851329	-2.06376	84.0061	206.103	530.11	393.334	1213.55	0.588031	24442.3	0	0.869269	0.851329	-2.06376	84.0061	172.507	359.414	114.54	730.467	0.353951
Changde City	Hunan	29609.1	98.6305	0.868643	0.850054	-2.14	59.4525	203.107	2.96242	288.469	553.991	0.258874	29609.1	98.6305	0.868643	0.847883	-2.38991	59.4525	203.107	478.355	288.469	1029.38	0.43072	29609.1	98.6305	0.868643	0.847883	-2.38991	59.4525	170	324.325	84.0031	637.78	0.266863
Zhangjiajie City	Hunan	1211.54	0	0.138393	0.138201	-0.138952	20.751	50.0431	1.87833	76.8807	149.553	1.07613	1211.54	0	0.138393	0.137374	-0.736379	20.751	50.0431	303.301	76.8807	450.976	0.612456	1211.54	0	0.138393	0.137374	-0.736379	20.751	41.8859	205.638	22.3879	290.663	0.39474
Huaihua City	Hunan	18427	0	0.183156	0.181723	-0.782338	62.5775	140.688	1.66352	168.966	373.895	0.477922	18427	0	0.183156	0.180843	-1.26307	62.5775	140.688	268.616	168.966	640.848	0.507357	18427	0	0.183156	0.180843	-1.26307	62.5775	117.755	182.122	49.2034	411.658	0.325908
Zhuzhou City	Hunan	23618.7	0	0.296308	0.290451	-1.97679	151.975	306.195	3.74458	500.568	962.482	0.48689	23618.7	0	0.296308	0.286674	-3.25161	151.975	306.195	604.654	500.568	1563.39	0.480807	23618.7	0	0.296308	0.286674	-3.25161	151.975	256.284	409.956	145.767	963.981	0.296464
Yongzhou City	Hunan	12166.4	0	0.235722	0.234582	-0.48379	68.0304	166.946	1.67386	238.924	475.575	0.982967	12166.4	0	0.235722	0.233604	-0.898388	68.0304	166.946	270.286	238.924	744.187	0.82836	12166.4	0	0.235722	0.233604	-0.898388	68.0304	139.733	183.254	69.5755	460.593	0.51269
Xiangtan City	Hunan	21513.6	77.2657	0.780935	0.740313	-5.20176	58.104	233.736	3.85751	323.544	619.241	0.119044	21513.6	77.2657	0.780935	0.73196	-6.27136	58.104	233.736	622.888	323.544	1238.27	0.197449	21513.6	77.2657	0.780935	0.73196	-6.27136	58.104	195.636	422.318	94.2169	770.275	0.122824
West Hunan Tujia & Miao A.P	Hunan	5846.18	0	0.100492	0.100014	-0.47556	35.0611	101.791	0	175.501	312.353	0.656745	5846.18	0	0.100492	0.0988079	-1.67595	35.0611	101.791	0	175.501	312.353	0.186376	5846.18	0	0.100492	0.0988079	-1.67595	35.0611	85.1983	0	51.1064	171.366	0.102251
Yiyang City	Hunan	21140.4	0	0.535602	0.524513	-2.07055	40.7171	135.24	1.96456	310.737	488.658	0.236007	21140.4	0	0.535602	0.522555	-2.43612	40.7171	135.24	317.227	310.737	803.921	0.330003	21140.4	0	0.535602	0.522555	-2.43612	40.7171	113.195	215.08	90.4876	459.479	0.188613
Hengyang City	Hunan	15270	0	0.814354	0.804047	-1.26575	129.204	210.003	2.26854	381.142	722.618	0.570898	15270	0	0.814354	0.801474	-1.5816	129.204	210.003	366.312	381.142	1086.66	0.687063	15270	0	0.814354	0.801474	-1.5816	129.204	175.771	248.359	110.99	664.325	0.420033
Shaoyang City	Hunan	17252.6	0	0.334689	0.331493	-0.954738	66.138	180.038	1.22281	444.541	691.939	0.724742	17252.6	0	0.334689	0.330023	-1.39401	66.138	180.038	197.452	444.541	888.169	0.63713	17252.6	0	0.334689	0.330023	-1.39401	66.138	150.691	133.873	129.452	480.153	0.344439
Chenzhou City	Hunan	27126.1	0	0.372921	0.368063	-1.30269	45.3809	148.508	2.72458	250.41	447.024	0.343153	27126.1	0	0.372921	0.367009	-1.58532	45.3809	148.508	439.949	250.41	884.248	0.557768	27126.1	0	0.372921	0.367009	-1.58532	45.3809	124.301	298.286	72.9202	540.887	0.341182
Changsha City	Hunan	81341.9	0	0.637115	0.593375	-6.86528	133.831	716.479	7.36923	2106.36	2964.04	0.431744	81341.9	0	0.637115	0.584438	-8.26812	133.831	716.479	1189.94	2106.36	4146.61	0.501518	81341.9	0	0.637115	0.584438	-8.26812	133.831	599.69	806.78	613.378	2153.68	0.26048
Jilin City	Jilin	1730.93	0	0.0814227	0.0800484	-1.68786	112.696	430.701	7.60739	465.834	1016.84	0.602438	1730.93	0	0.0814227	0.0690488	-15.1971	112.696	430.701	83.0702	465.834	1092.3	0.0718758	1730.93	0	0.0814227	0.0690488	-15.1971	112.696	364.079	56.3216	209.228	742.325	0.0488466
Siping City	Jilin	965.535	0	0.199085	0.193164	-2.97381	48.6505	194.894	5.11636	93.732	342.393	0.115136	965.535	0	0.199085	0.159051	-20.109	48.6505	194.894	55.869	93.732	393.146	0.0195507	965.535	0	0.199085	0.159051	-20.109	48.6505	164.748	37.8792	42.0994	293.377	0.0145893
Yanbian Korean A.P	Jilin	7358.73	0				79.0045	293.825	5.44249	122.161	500.433		7358.73	0				79.0045	293.825	59.4303	122.161	554.421		7358.73	0				79.0045	248.376	40.2937	54.8681	422.542
Songyuan City	Jilin	10990.2		0.100624	0.091589	-8.97888	61.4985	149.972	7.9825	78.3929	297.846	0.0331719	10990.2		0.100624	0.0775735	-22.9075	61.4985	149.972	87.1663	78.3929	377.03	0.0164588	10990.2		0.100624	0.0775735	-22.9075	61.4985	126.774	59.0987	35.2099	282.581	0.0123358
Baicheng City	Jilin	1716.5	0	0.0264623	0.0258833	-2.18802	33.151	76.3486	4.82564	35.2344	149.56	0.0683596	1716.5	0	0.0264623	0.0218819	-17.3092	33.151	76.3486	52.6944	35.2344	197.428	0.0114061	1716.5	0	0.0264623	0.0218819	-17.3092	33.151	64.5388	35.7268	15.8254	149.242	0.0086222
Baishan City	Jilin	6374.49	0	0.0255004	0.0249422	-2.18899	38.9351	101.711	7.20854	53.2581	201.113	0.0918747	6374.49	0	0.0255004	0.0223895	-12.1994	38.9351	101.711	78.715	53.2581	272.619	0.0223473	6374.49	0	0.0255004	0.0223895	-12.1994	38.9351	85.9783	53.3687	23.9207	202.203	0.016575
Liaoyuan City	Jilin	6009.39	19.3594	0.140779	0.122121	-13.254	33.5325	114.244	8.12006	79.0265	234.923	0.0177247	6009.39	19.3594	0.140779	0.0932788	-33.7412	33.5325	114.244	88.6684	79.0265	315.472	0.0093498	6009.39	19.3594	0.140779	0.0932788	-33.7412	33.5325	96.5727	60.1172	35.4945	225.717	0.0066897
Tonghua City	Jilin	11080.6	0	0.0512794	0.0492207	-4.01467	69.0816	158.84	6.128	100.943	334.993	0.0834452	11080.6	0	0.0512794	0.043575	-15.0244	69.0816	158.84	66.9157	100.943	395.78	0.0263425	11080.6	0	0.0512794	0.043575	-15.0244	69.0816	134.27	45.3689	45.3382	294.059	0.0195721
Changchun City	Jilin	13766.7	2884.88	0.262233	0.245331	-6.44544	202.749	551.208	9.94729	477.107	1241.01	0.192541	13766.7	2884.88	0.262233	0.216381	-17.4853	202.749	551.208	108.621	477.107	1339.68	0.0766178	13766.7	2884.88	0.262233	0.216381	-17.4853	202.749	465.946	73.6452	214.291	956.631	0.0547106
Nanjing City	Jiangsu	62264.2	14886	0.581606	0.505282	-13.123	244.863	471.884	13.4367	255.24	985.424	0.0750914	62264.2	14886	0.581606	0.501953	-13.6953	244.863	471.884	19.6063	255.24	991.594	0.0724037	62264.2	14886	0.581606	0.501953	-13.6953	244.863	416.895	13.2931	130.926	805.978	0.0588505
Nantong City	Jiangsu	46568	1486.95	0.0606977	0.050365	-17.0232	223.767	518.292	9.57811	341.596	1093.23	0.06422	46568	1486.95	0.0606977	0.0475361	-21.6839	223.767	518.292	13.976	341.596	1097.63	0.0506196	46568	1486.95	0.0606977	0.0475361	-21.6839	223.767	457.896	9.47573	175.223	866.361	0.039954
Suqian City	Jiangsu	29791.1	1005.79	0.0833377	0.0680734	-18.3162	85.0295	178.411	4.98634	75.5202	343.947	0.0187783	29791.1	1005.79	0.0833377	0.065504	-21.3993	85.0295	178.411	7.27586	75.5202	346.236	0.0161798	29791.1	1005.79	0.0833377	0.065504	-21.3993	85.0295	157.62	4.93303	38.7383	286.321	0.0133799
Changzhou City	Jiangsu	16365.7	3080.14	0.147367	0.134809	-8.52126	152.818	284.231	12.7602	288.785	738.594	0.0866767	16365.7	3080.14	0.147367	0.132001	-10.4266	152.818	284.231	18.6191	288.785	744.452	0.0713994	16365.7	3080.14	0.147367	0.132001	-10.4266	152.818	251.109	12.6238	148.133	564.684	0.054158
Xuzhou City	Jiangsu	37291.2	3729.7	0.132756	0.110842	-16.507	148.993	414.582	6.99415	176.913	747.483	0.0452829	37291.2	3729.7	0.132756	0.106789	-19.56	148.993	414.582	10.2056	176.913	750.694	0.0383791	37291.2	3729.7	0.132756	0.106789	-19.56	148.993	366.271	6.91939	90.7481	612.931	0.031336
Yangzhou City	Jiangsu	29530.8	2276.77	0.083292	0.0710692	-14.6746	115.136	310.019	10.1934	136.528	571.875	0.0389704	29530.8	2276.77	0.083292	0.068242	-18.069	115.136	310.019	14.8738	136.528	576.556	0.0319086	29530.8	2276.77	0.083292	0.068242	-18.069	115.136	273.892	10.0844	70.0321	469.144	0.0259641
Wuxi City	Jiangsu	100118	7504.17	0.155045	0.112584	-27.3861	368.006	819.95	14.8884	603.534	1806.38	0.0659598	100118	7504.17	0.155045	0.106765	-31.1392	368.006	819.95	21.7246	603.534	1813.21	0.0582293	100118	7504.17	0.155045	0.106765	-31.1392	368.006	724.401	14.7292	309.584	1416.72	0.0454964
Taizhou City	Jiangsu	18524	455.071	0.0597922	0.0538391	-9.95632	117.225	151.861	9.03722	26.5413	304.665	0.0306005	18524	455.071	0.0597922	0.0524047	-12.3553	117.225	151.861	13.1867	26.5413	308.814	0.0249946	18524	455.071	0.0597922	0.0524047	-12.3553	117.225	134.165	8.94061	13.6144	273.945	0.0221723
Huai'an City	Jiangsu	21269.4	32.4361	0.0504357	0.0456139	-9.56029	91.0879	210.606	6.41982	94.8628	402.976	0.0421505	21269.4	32.4361	0.0504357	0.0442576	-12.2495	91.0879	210.606	9.36755	94.8628	405.924	0.0331378	21269.4	32.4361	0.0504357	0.0442576	-12.2495	91.0879	186.064	6.3512	48.6601	332.163	0.0271163
Yancheng City	Jiangsu	20527.5	45.4318	0.018119	0.0157116	-13.2866	137.664	227.46	6.62893	78.064	449.817	0.0338554	20527.5	45.4318	0.018119	0.0147928	-18.3575	137.664	227.46	9.67267	78.064	452.861	0.024669	20527.5	45.4318	0.018119	0.0147928	-18.3575	137.664	200.954	6.55807	40.0431	385.219	0.0209843
Suzhou City	Jiangsu	158027	7331.16	0.182872	0.134455	-26.4759	658.627	1299.34	15.5438	860.265	2833.78	0.107033	158027	7331.16	0.182872	0.128545	-29.7078	658.627	1299.34	22.6809	860.265	2840.92	0.0956284	158027	7331.16	0.182872	0.128545	-29.7078	658.627	1147.93	15.3776	441.274	2263.21	0.0761822
Lianyungang City	Jiangsu	20748.5	34.9337	0.147409	0.12784	-13.2759	69.7438	154.192	5.50518	42.108	271.549	0.0204543	20748.5	34.9337	0.147409	0.125245	-15.0363	69.7438	154.192	8.03293	42.108	274.077	0.0182277	20748.5	34.9337	0.147409	0.125245	-15.0363	69.7438	136.224	5.44633	21.5994	233.013	0.0154968
Zhenjiang City	Jiangsu	24272.5	1005.22	0.101092	0.0894056	-11.56	112.249	209.369	12.5475	83.2029	417.368	0.0361045	24272.5	1005.22	0.101092	0.08722	-13.722	112.249	209.369	18.3089	83.2029	423.129	0.0308358	24272.5	1005.22	0.101092	0.08722	-13.722	112.249	184.971	12.4134	42.6791	352.312	0.025675
Shangrao City	Jiangxi	22180.7	0	0.0029194	0.0028652	-1.85655	79.04	200.669	3.65053	320.128	603.487	0.325416	22180.7	0	0.0029194	0.0026395	-9.58759	79.04	200.669	26.2065	320.128	626.043	0.0653078	22180.7	0	0.0029194	0.0026395	-9.58759	79.04	153.232	17.768	79.0347	329.075	0.0343285
Jiujiang City	Jiangxi	23350.8	559.378	0.0106935	0.0104787	-2.0087	74.0933	240.019	5.85452	331.374	651.342	0.324225	23350.8	559.378	0.0106935	0.009959	-6.86866	74.0933	240.019	42.0285	331.374	687.516	0.100094	23350.8	559.378	0.0106935	0.009959	-6.86866	74.0933	183.28	28.4953	81.8114	367.68	0.0535299
Nanchang City	Jiangxi	30715.1	0	0.0939215	0.0906449	-3.48866	94.7321	357.802	11.245	821.376	1285.15	0.368378	30715.1	0	0.0939215	0.0890929	-5.1411	94.7321	357.802	80.726	821.376	1354.64	0.26349	30715.1	0	0.0939215	0.0890929	-5.1411	94.7321	273.22	54.7322	202.785	625.47	0.12166
Jian City	Jiangxi	14641.5		0.0036226	0.0035727	-1.37746	34.5469	131.383	4.02621	196.282	366.239	0.266176	14641.5		0.0036226	0.0033806	-6.68028	34.5469	131.383	28.9034	196.282	391.116	0.0585577	14641.5		0.0036226	0.0033806	-6.68028	34.5469	100.325	19.5965	48.4591	202.928	0.0303823
Yichun City	Jiangxi	13788.4	0	0.004838	0.0047446	-1.93055	53.604	215.339	4.36543	285.416	558.724	0.289384	13788.4	0	0.004838	0.0043501	-10.0847	53.604	215.339	31.3387	285.416	585.697	0.0580695	13788.4	0	0.004838	0.0043501	-10.0847	53.604	164.434	21.2476	70.4648	309.75	0.0307105
Fuzhou City	Jiangxi	6361.29	0	0.00474	0.0046909	-1.03587	51.7271	150.743	4.11024	317.444	524.025	0.505196	6361.29	0	0.00474	0.004457	-5.97046	51.7271	150.743	29.5067	317.444	549.421	0.0920023	6361.29	0	0.00474	0.004457	-5.97046	51.7271	115.109	20.0055	78.3722	265.213	0.0444108
Xinyu City	Jiangxi	10097.5	0	0.0278267	0.0268313	-3.57714	19.846	121.546	12.0564	188.858	342.305	0.0956877	10097.5	0	0.0278267	0.0254502	-8.54036	19.846	121.546	86.5507	188.858	416.8	0.0488029	10097.5	0	0.0278267	0.0254502	-8.54036	19.846	92.813	58.6814	46.6261	217.966	0.0255216
Jingdezhen City	Jiangxi	0	693.844	0.0164572	0.0163859	-0.433245	19.0191	86.9604	6.99726	138.949	251.925	0.581696	0	693.844	0.0164572	0.0159455	-3.10928	19.0191	86.9604	50.2321	138.949	295.16	0.0949354	0	693.844	0.0164572	0.0159455	-3.10928	19.0191	66.4036	34.0573	34.3043	153.784	0.0494632
Pingxiang City	Jiangxi	12535.4	99.2275	0.0310184	0.0300101	-3.25065	21.3387	72.4941	7.13316	83.1594	184.125	0.0566402	12535.4	99.2275	0.0310184	0.0293188	-5.47933	21.3387	72.4941	51.2077	83.1594	228.2	0.0416468	12535.4	99.2275	0.0310184	0.0293188	-5.47933	21.3387	55.357	34.7188	20.5308	131.945	0.0240802
Ganzhou City	Jiangxi	21495.6	14.914	0.0080577	0.0079726	-1.05613	67.1385	211.733	3.43046	346.276	628.578	0.594951	21495.6	14.914	0.0080577	0.0077358	-3.99494	67.1385	211.733	24.6267	346.276	649.774	0.162674	21495.6	14.914	0.0080577	0.0077358	-3.99494	67.1385	161.68	16.6969	85.4904	331.006	0.0828688
Yingtan City	Jiangxi	6797.8		0.006889	0.0067181	-2.48077	17.6701	75.1638	8.235	43.6422	144.711	0.0583205	6797.8		0.006889	0.006171	-10.4224	17.6701	75.1638	59.1176	43.6422	195.594	0.0187675	6797.8		0.006889	0.006171	-10.4224	17.6701	57.3956	40.0817	10.7746	125.922	0.0120824
Dandong City	Liaoning	11891.6	0	0.0340546	0.03066	-9.96811	37.2084	48.0616	0.232257	185.922	271.425	0.0272287	11891.6	0	0.0340546	0.0273581	-19.664	37.2084	48.0616	0.540506	185.922	271.733	0.0138186	11891.6	0	0.0340546	0.0273581	-19.664	37.2084	43.8616	0.366463	57.7238	139.16	0.0070768
Dalian City	Liaoning	4274.06	25122.8	0.675004	0.58863	-12.7962	153.093	317.486	0.629293	1100.57	1571.78	0.122832	4274.06	25122.8	0.675004	0.50634	-24.9872	153.093	317.486	1.46449	1100.57	1572.61	0.0629368	4274.06	25122.8	0.675004	0.50634	-24.9872	153.093	289.742	0.992921	341.696	785.523	0.0314371
Fushun City	Liaoning	18182.9		0.150732	0.123873	-17.8192	26.6432	127.736	0.333159	455.002	609.714	0.0342167	18182.9		0.150732	0.105385	-30.0846	26.6432	127.736	0.775324	455.002	610.157	0.0202813	18182.9		0.150732	0.105385	-30.0846	26.6432	116.574	0.52567	141.266	285.008	0.0094735
Chaoyang City	Liaoning	8041.28	3482.68	0.165781	0.116679	-29.6187	49.8492	79.6334	0.164041	507.458	637.105	0.0215102	8041.28	3482.68	0.165781	0.0788814	-52.4183	49.8492	79.6334	0.381754	507.458	637.323	0.0121584	8041.28	3482.68	0.165781	0.0788814	-52.4183	49.8492	72.6745	0.258829	157.552	280.334	0.005348
Benxi City	Liaoning	14413.3	0	0.194949	0.172027	-11.758	26.1968	90.2596	0.384665	45.8568	162.698	0.0138372	14413.3	0	0.194949	0.159063	-18.408	26.1968	90.2596	0.895188	45.8568	163.208	0.0088662	14413.3	0	0.194949	0.159063	-18.408	26.1968	82.372	0.606938	14.2373	123.413	0.0067043
Shenyang City	Liaoning	5079.69	3164.87	0.936008	0.876787	-6.32697	166.211	194.93	0.499383	1109.96	1471.6	0.232592	5079.69	3164.87	0.936008	0.838542	-10.4129	166.211	194.93	1.16216	1109.96	1472.26	0.141388	5079.69	3164.87	0.936008	0.838542	-10.4129	166.211	177.895	0.787944	344.612	689.506	0.0662162
Panjin City	Liaoning	12798.5		0.78927	0.370501	-53.0578	42.7142	70.225	0.496642	214.327	327.763	0.0061775	12798.5		0.78927	0.293546	-62.8079	42.7142	70.225	1.15578	214.327	328.422	0.005229	12798.5		0.78927	0.293546	-62.8079	42.7142	64.0882	0.78362	66.5427	174.129	0.0027724
Yingkou City	Liaoning	7458.97	803.332	0.206758	0.167155	-19.1542	87.8787	62.3866	0.35208	222.318	372.935	0.0194701	7458.97	803.332	0.206758	0.141755	-31.4391	87.8787	62.3866	0.819359	222.318	373.402	0.011877	7458.97	803.332	0.206758	0.141755	-31.4391	87.8787	56.9348	0.555525	69.0236	214.393	0.0068193
Huludao City	Liaoning	13450.4	1443.99	0.1507	0.1112	-26.211	42.0519	59.008	0.160197	87.9387	189.159	0.0072168	13450.4	1443.99	0.1507	0.0901118	-40.2047	42.0519	59.008	0.37281	87.9387	189.371	0.0047102	13450.4	1443.99	0.1507	0.0901118	-40.2047	42.0519	53.8514	0.252765	27.3026	123.459	0.0030708
Liaoyang City	Liaoning	2562.04	227.381	0.202683	0.175569	-13.3775	33.9255	78.9465	0.31654	378.082	491.271	0.0367235	2562.04	227.381	0.202683	0.147554	-27.1994	33.9255	78.9465	0.736649	378.082	491.691	0.0180772	2562.04	227.381	0.202683	0.147554	-27.1994	33.9255	72.0476	0.499448	117.384	223.857	0.0082302
Tieling City	Liaoning	14036.9	1548.03	0.0516007	0.0329725	-36.1007	33.559	84.4109	0.158543	298.765	416.893	0.0115481	14036.9	1548.03	0.0516007	0.0149419	-71.0432	33.559	84.4109	0.368959	298.765	417.104	0.0058711	14036.9	1548.03	0.0516007	0.0149419	-71.0432	33.559	77.0345	0.250155	92.7583	203.602	0.0028659
Jinzhou City	Liaoning	26017.2	769.941	0.517942	0.312909	-39.5861	55.2161	123.229	0.245657	366.887	545.579	0.0137821	26017.2	769.941	0.517942	0.265421	-48.7547	55.2161	123.229	0.571692	366.887	545.905	0.011197	26017.2	769.941	0.517942	0.265421	-48.7547	55.2161	112.461	0.387607	113.909	281.973	0.0057835
Fuxin City	Liaoning	13073.5	0	0.280676	0.186845	-33.4304	49.797	70.8958	0.167674	375.927	496.787	0.0148603	13073.5	0	0.280676	0.148396	-47.1291	49.797	70.8958	0.390209	375.927	497.01	0.0105457	13073.5	0	0.280676	0.148396	-47.1291	49.797	64.7004	0.264562	116.715	231.477	0.0049115
Anshan City	Liaoning	17620	0	0.321617	0.278678	-13.3507	86.6503	110.407	0.367915	515.632	713.058	0.0534096	17620	0	0.321617	0.260982	-18.8531	86.6503	110.407	0.856208	515.632	713.546	0.0378477	17620	0	0.321617	0.260982	-18.8531	86.6503	100.759	0.580509	160.09	348.079	0.0184627
Ulanqab City	Inner Mongolia	0	1651.78	2.55472	2.53064	-0.942374	75.3379	185.913	21.0715	121.503	403.826	0.42851	0	1651.78	2.55472	2.52107	-1.31717	75.3379	185.913	29.4513	121.503	412.205	0.312948	0	1651.78	2.55472	2.52107	-1.31717	75.3379	170.742	19.968	47.2829	313.33	0.237882
Wuhai City	Inner Mongolia	845.796	1121.4	17.6363	13.3012	-24.5808	20.2274	136.278	49.1777	112.712	318.395	0.012953	845.796	1121.4	17.6363	13.1608	-25.3765	20.2274	136.278	68.7347	112.712	337.952	0.0133175	845.796	1121.4	17.6363	13.1608	-25.3765	20.2274	125.156	46.6022	43.8619	235.848	0.009294
Xingan League	Inner Mongolia	7063.09	1563.12	0.6713	0.660031	-1.6787	51.538	139.435	15.3041	33.8849	240.162	0.143065	7063.09	1563.12	0.6713	0.659037	-1.82684	51.538	139.435	21.3902	33.8849	246.248	0.134794	7063.09	1563.12	0.6713	0.659037	-1.82684	51.538	128.056	14.5026	13.1863	207.283	0.113465
Baotou City	Inner Mongolia	28507.9	11575	4.00374	2.56954	-35.8215	181.353	757.738	64.4774	672.481	1676.05	0.046789	28507.9	11575	4.00374	2.53504	-36.6833	181.353	757.738	90.1188	672.481	1701.69	0.0463887	28507.9	11575	4.00374	2.53504	-36.6833	181.353	695.902	61.1006	261.696	1200.05	0.0327138
Hulunbuir City	Inner Mongolia	4140.25	2191.68	0.0886175	0.0874216	-1.34951	163.818	395.467	30.7783	204.706	794.769	0.588944	4140.25	2191.68	0.0886175	0.0869876	-1.83925	163.818	395.467	43.0182	204.706	807.009	0.438759	4140.25	2191.68	0.0886175	0.0869876	-1.83925	163.818	363.195	29.1664	79.6615	635.84	0.345697
Hohhot City	Inner Mongolia	2525.16	1368.18	2.85626	2.71808	-4.83776	141.497	514.683	49.4804	189.324	894.984	0.185	2525.16	1368.18	2.85626	2.6956	-5.6247	141.497	514.683	69.1579	189.324	914.662	0.162615	2525.16	1368.18	2.85626	2.6956	-5.6247	141.497	472.681	46.889	73.6754	734.743	0.130628
Bayannur City	Inner Mongolia	661.183	1600.45	30.2861	29.8032	-1.59453	83.8159	248.685	25.8328	218.902	577.236	0.362015	661.183	1600.45	30.2861	29.7825	-1.66268	83.8159	248.685	36.106	218.902	587.509	0.353351	661.183	1600.45	30.2861	29.7825	-1.66268	83.8159	228.39	24.4799	85.1858	421.872	0.253731
Chifeng City	Inner Mongolia	9349.59	1990.11	1.99979	1.89431	-5.27421	140.643	647.877	21.095	443.212	1252.83	0.237538	9349.59	1990.11	1.99979	1.88376	-5.80182	140.643	647.877	29.484	443.212	1261.22	0.217382	9349.59	1990.11	1.99979	1.88376	-5.80182	140.643	595.006	19.9902	172.476	928.115	0.159969
Tongliao City	Inner Mongolia	12376.8	287.054	1.57915	1.51066	-4.33702	81.3446	453.354	29.3191	337.897	901.915	0.207955	12376.8	287.054	1.57915	1.50566	-4.65384	81.3446	453.354	40.9788	337.897	913.575	0.196305	12376.8	287.054	1.57915	1.50566	-4.65384	81.3446	416.357	27.7836	131.493	656.978	0.141169
Erdos City	Inner Mongolia	3499.43	18744.1	3.61666	3.53233	-2.33187	232.859	302.841	100.998	376.643	1013.34	0.434562	3499.43	18744.1	3.61666	3.52601	-2.50656	232.859	302.841	141.163	376.643	1053.51	0.420301	3499.43	18744.1	3.61666	3.52601	-2.50656	232.859	278.128	95.7088	146.571	753.266	0.300519
Xilingol League	Inner Mongolia	423.444	793.211	0.493255	0.488506	-0.962809	80.5479	115.132	46.8151	63.2334	305.728	0.317539	423.444	793.211	0.493255	0.486914	-1.28538	80.5479	115.132	65.4326	63.2334	324.346	0.252337	423.444	793.211	0.493255	0.486914	-1.28538	80.5479	105.737	44.3633	24.6073	255.255	0.198585
Alxa League	Inner Mongolia	0	1086.24	6.81036	6.79561	-0.216626	56.2234	53.6906	64.9327	15.5503	190.397	0.878958	0	1086.24	6.81036	6.78974	-0.302774	56.2234	53.6906	90.7553	15.5503	216.22	0.71415	0	1086.24	6.81036	6.78974	-0.302774	56.2234	49.3091	61.5321	6.05141	173.116	0.571783
Wuzhong City	Ningxia	2044.56	804.079	31.3223	26.4742	-15.4781	48.534	27.9712	0.0229836	97.2835	173.812	0.0112295	2044.56	804.079	31.3223	26.3772	-15.7878	48.534	27.9712	0.0947675	97.2835	173.883	0.0110138	2044.56	804.079	31.3223	26.3772	-15.7878	48.534	24.7435	0.0642523	49.352	122.694	0.0077714
Guyuan City	Ningxia	250.274	119.95	1.31694	1.30687	-0.764272	19.3357	6.28013	0.0137725	25.8652	51.4948	0.0673794	250.274	119.95	1.31694	1.29997	-1.28829	19.3357	6.28013	0.0567877	25.8652	51.5378	0.0400045	250.274	119.95	1.31694	1.29997	-1.28829	19.3357	5.55546	0.0385021	13.1214	38.0511	0.0295359
Shizuishan City	Ningxia	1756.48	970.998	16.932	14.6195	-13.6572	52.1818	22.7524	0.0478626	29.452	104.434	0.0076468	1756.48	970.998	16.932	14.5389	-14.1336	52.1818	22.7524	0.19735	29.452	104.583	0.0073996	1756.48	970.998	16.932	14.5389	-14.1336	52.1818	20.1269	0.133803	14.941	87.3835	0.0061827
Yinchuan City	Ningxia	10441.5	738.788	20.1913	11.1847	-44.6066	90.5044	111.982	0.0538596	266.448	468.988	0.0105139	10441.5	738.788	20.1913	10.9658	-45.6907	90.5044	111.982	0.222077	266.448	469.157	0.0102681	10441.5	738.788	20.1913	10.9658	-45.6907	90.5044	99.0604	0.150568	135.169	324.885	0.0071105
Haidong City	Qinghai	2825.05		1.94037	1.89349	-2.41609	41.7769	11.2163	0.3646	38.0394	91.3972	0.0378289	2825.05		1.94037	1.88799	-2.69938	41.7769	11.2163	1.18873	38.0394	92.2214	0.0341641	2825.05		1.94037	1.88799	-2.69938	41.7769	7.80811	0.805959	38.0394	88.4304	0.0327597
Haibei Zang A.P	Qinghai	0					23.0019	0	0.439208	8.96223	32.4033		0					23.0019	0	1.43198	8.96223	33.3961		0					23.0019	0	0.970882	8.96223	32.935
Hainan Zang A.P	Qinghai	1691.77	0	0.324323	0.322042	-0.703096	11.5247	5.74631	0.414334	23.2756	40.961	0.0582566	1691.77	0	0.324323	0.320915	-1.05081	11.5247	5.74631	1.35088	23.2756	41.8975	0.0398717	1691.77	0	0.324323	0.320915	-1.05081	11.5247	4.00024	0.915897	23.2756	39.7165	0.0377961
Haixi Mongolian & Zang A.P	Qinghai	0	1441.54	0.167967	0.167563	-0.240702	19.588	19.336	1.19165	43.9241	84.0399	0.349185	0	1441.54	0.167967	0.166649	-0.784677	19.588	19.336	3.88521	43.9241	86.7334	0.110533	0	1441.54	0.167967	0.166649	-0.784677	19.588	13.4606	2.63417	43.9241	79.6069	0.101451
Xining City	Qinghai	2303.16	1034.88	1.1532	1.11451	-3.35526	87.9386	79.2433	0.675825	557.708	725.566	0.216243	2303.16	1034.88	1.1532	1.0757	-6.72093	87.9386	79.2433	2.20344	557.708	727.093	0.108184	2303.16	1034.88	1.1532	1.0757	-6.72093	87.9386	55.1645	1.49393	557.708	702.305	0.104495
Huangnan Zang AP	Qinghai	734.899		0.584359	0.582062	-0.393132	6.3731	0.395343	0.373478	4.45156	11.5935	0.0294903	734.899		0.584359	0.581937	-0.414471	6.3731	0.395343	1.21768	4.45156	12.4377	0.0300081	734.899		0.584359	0.581937	-0.414471	6.3731	0.275215	0.825584	4.45156	11.9255	0.0287723
Dongying City	Shandong	20390.5		4.34668	3.07705	-29.2092	68.5433	163.847	4.59418	80.6417	317.626	0.0108742	20390.5		4.34668	3.06628	-29.4569	68.5433	163.847	7.40249	80.6417	320.435	0.0108781	20390.5		4.34668	3.06628	-29.4569	68.5433	154.766	5.01889	39.8397	268.168	0.0091037
Linyi City	Shandong	71331.9	830.676	1.61818	1.20445	-25.5676	125.448	437.009	1.02724	59.9104	623.395	0.0243823	71331.9	830.676	1.61818	1.19737	-26.0052	125.448	437.009	1.65517	59.9104	624.023	0.0239961	71331.9	830.676	1.61818	1.19737	-26.0052	125.448	412.788	1.12221	29.5978	568.956	0.0218786
Weihai City	Shandong	3515.24	1031.45	1.31061	1.22125	-6.81789	71.5254	166.226	2.99637	130.728	371.476	0.0544856	3515.24	1031.45	1.31061	1.20949	-7.71571	71.5254	166.226	4.82798	130.728	373.308	0.0483832	3515.24	1031.45	1.31061	1.20949	-7.71571	71.5254	157.013	3.27337	64.5841	296.396	0.0384149
Dezhou City	Shandong	37687.4	33.6341	3.47672	2.65609	-23.6036	89.3018	260.889	1.34688	132.208	483.746	0.0204946	37687.4	33.6341	3.47672	2.6486	-23.8189	89.3018	260.889	2.1702	132.208	484.57	0.0203439	37687.4	33.6341	3.47672	2.6486	-23.8189	89.3018	246.429	1.4714	65.3153	402.518	0.0168991
Rizhao City	Shandong	14731.6	2855.11	1.2416	1.00569	-19.0007	64.5525	145.696	1.62847	87.4822	299.36	0.0157552	14731.6	2855.11	1.2416	0.997449	-19.6645	64.5525	145.696	2.62391	87.4822	300.355	0.015274	14731.6	2855.11	1.2416	0.997449	-19.6645	64.5525	137.621	1.77901	43.2191	247.172	0.0125694
Zaozhuang City	Shandong	22184.7	596.678	2.96438	1.97649	-33.3253	67.6394	196.608	1.47663	121.796	387.52	0.0116284	22184.7	596.678	2.96438	1.96306	-33.7784	67.6394	196.608	2.37927	121.796	388.423	0.0114991	22184.7	596.678	2.96438	1.96306	-33.7784	67.6394	185.711	1.61314	60.1713	315.135	0.0093295
Taian City	Shandong	23081.8	2205.05	2.63902	2.0274	-23.176	54.6656	216.067	1.58307	117.847	390.163	0.0168348	23081.8	2205.05	2.63902	2.01757	-23.5484	54.6656	216.067	2.55076	117.847	391.13	0.0166097	23081.8	2205.05	2.63902	2.01757	-23.5484	54.6656	204.091	1.72942	58.2204	318.707	0.0135341
[truncated: 97 more rows]

## Sheet: 1.2 uncertainty_W-MRIO
year	SD_life-cycle CO2 emissions (Mt CO2e)	RSD (%)	SD_life-cycle CH4 emissions (Mt CO2e)	RSD (%)	SD_life-cycle N2O emissions (Mt CO2e)	RSD (%)
[truncated: 10 more rows]

[truncated: 1 more sheets: 1.2 uncertainty_scenario]
